# Supplementary material for: Palladium-catalyzed synthesis of 4-sila-4H-benzo[d][1,3]oxazines by intramolecular Hiyama coupling
Source: Royal Society of Chemistry journal article supplement (doi:10.1039/d2sc06425a), 2023-01-01
Supplement: d2sc06425a1.pdf [file d2sc06425a1.pdf]

**Electronic Supplementary Information**  
**for**  
**Palladium-catalyzed synthesis of 4-sila-4*H*-benzo[*d*][1,3]oxazines**  
**by intramolecular Hiyama coupling**

Donghyeon Lee<sup>†</sup> and Ryo Shintani<sup>\*,†,‡</sup>

<sup>†</sup>*Division of Chemistry, Department of Materials Engineering Science, Graduate School of Engineering Science, Osaka University, Toyonaka, Osaka 560-8531, Japan*

<sup>‡</sup>*Innovative Catalysis Science Division, Institute for Open and Transdisciplinary Research Initiatives (ICS-OTRI), Osaka University, Suita, Osaka 565-0871, Japan*

|                                                        |             |
|--------------------------------------------------------|-------------|
| <b>I. General</b>                                      | <b>S2</b>   |
| <b>II. Synthesis of Substrates</b>                     | <b>S3</b>   |
| <b>III. Catalytic Reactions and Derivatization</b>     | <b>S23</b>  |
| <b>IV. X-ray Crystal Structure</b>                     | <b>S47</b>  |
| <b>V. <sup>1</sup>H and <sup>13</sup>C NMR Spectra</b> | <b>S55</b>  |
| <b>VI. References</b>                                  | <b>S209</b> |

## I. General

All air- and moisture-sensitive manipulations were carried out with standard Schlenk techniques under nitrogen. NMR spectra were recorded on JEOL JNM-ECS400 or Agilent Unity-Inova500 spectrometer. High resolution mass spectra were recorded on JEOL JMS700 spectrometer. X-ray crystallographic analysis was performed by RIGAKU XTaLAB P200 system with graphite-monochromated Mo-K $\alpha$  (0.71075 Å) radiation. Preparative GPC was performed with JAI LaboACE LC-5060 equipped with JAIGEL-2HR columns using CHCl<sub>3</sub> as an eluent.

Et<sub>3</sub>N (Wako Chemicals), *i*Pr<sub>2</sub>NH (Wako Chemicals), Et<sub>2</sub>NH (Wako Chemicals), and 1,2,2,6,6-pentamethylpiperidine (Wako Chemicals) were distilled over KOH under vacuum. THF (Kanto Chemical; dehydrated), 1,2-dichloroethane (Kanto Chemical; dehydrated), CH<sub>2</sub>Cl<sub>2</sub> (Kanto Chemical; dehydrated), DMA (Wako Chemicals; dehydrated), DMF (Wako Chemicals; dehydrated), and toluene (Kanto Chemical; dehydrated) were degassed by purging nitrogen. Bromobenzene (Wako Chemicals), 4-methoxybenzoyl chloride (TCI), 4-methylbenzoyl chloride (TCI), bis(trichloromethyl) carbonate (TCI), benzyl alcohol (Nacalai Tesque), *tert*-butyl alcohol (Wako Chemicals), methyl trifluoromethanesulfonate (Wako Chemicals), *N*-phenylbis(trifluoromethanesulfonimide) (Kanto Chemical), imidazole (Nacalai Tesque), dicyclohexyldichlorosilane (Gelest), *tert*-butyldichloro(phenyl)silane (TCI), bis(pinacolato)diboron (Combi-Blocks), 4,4'-di-*tert*-butyl-2,2'-bipyridyl (TCI), PPh<sub>3</sub> (Wako Chemicals), PCy<sub>3</sub>•HBF<sub>4</sub> (TCI), P(*t*Bu)<sub>3</sub>•HBF<sub>4</sub> (TCI), dppf (Wako Chemicals), binap (Wako Chemicals), L\* (Aldrich), MeLi (Kanto Chemical; 1.37 M solution in cyclopentyl methyl ether), *n*BuLi (Kanto Chemical; 1.57 M solution in hexane), *t*BuLi (Kanto Chemical; 1.60 M solution in pentane), NaH (Kishida Chemical; 60 wt% in mineral oil), Na<sub>2</sub>SO<sub>4</sub> (Wako Chemicals), MgSO<sub>4</sub> (Wako Chemicals), Pd(OAc)<sub>2</sub> (Wako Chemicals), and [Ir(OMe)(cod)]<sub>2</sub> (TCI) were used as received. 3-Amino-2-bromophenol,<sup>1</sup> 3-amino-2-(*tert*-butyldiphenylsilyl)phenyl trifluoromethanesulfonate,<sup>2</sup> and Pd(PPh<sub>3</sub>)<sub>4</sub><sup>3</sup> were synthesized following the literature procedures.

## II. Synthesis of Substrates

### Representative Procedures for Substrates:

#### 2-(Dicyclohexyl(phenyl)silyl)-3-(4-methoxybenzamido)phenyl trifluoromethanesulfonate (1c)

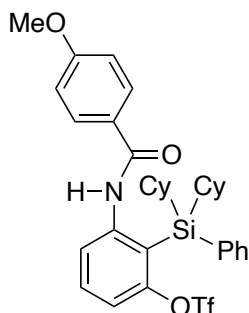

*t*BuLi (18.9 mL, 30.2 mmol; 1.60 M solution in pentane) was added dropwise over 10 min to a solution of bromobenzene (1.60 mL, 15.1 mmol) in THF (30 mL) at  $-78\text{ }^{\circ}\text{C}$  and the mixture was stirred for 1.5 h at  $-78\text{ }^{\circ}\text{C}$ . Dicyclohexyldichlorosilane (3.46 mL, 14.4 mmol) was added to it and the mixture was stirred for 2 h at room temperature. 3-Amino-2-bromophenol (2.26 g, 12.0 mmol) and imidazole (2.04 g, 30.0 mmol) were then added it and the resulting mixture was stirred for 1.5 h at  $60\text{ }^{\circ}\text{C}$ . The reaction was quenched with  $\text{H}_2\text{O}$  and this was extracted with  $\text{Et}_2\text{O}$ . The organic layer was washed with saturated NaCl<sub>aq</sub>, dried over  $\text{MgSO}_4$ , filtered, and concentrated under vacuum. The residue was chromatographed on silica gel with hexane/ $\text{CH}_2\text{Cl}_2 = 2/1$  to afford 2-bromo-3-(dicyclohexyl(phenyl)silyloxy)aniline as a colorless oil (5.35 g, 11.7 mmol; 98% yield).

$^1\text{H}$  NMR ( $\text{CDCl}_3$ ):  $\delta$  7.68-7.58 (m, 2H), 7.45-7.32 (m, 3H), 6.84 (t,  $^3J_{\text{HH}} = 8.3\text{ Hz}$ , 1H), 6.37 (dd,  $^3J_{\text{HH}} = 8.2\text{ Hz}$  and  $^4J_{\text{HH}} = 1.4\text{ Hz}$ , 1H), 6.21 (dd,  $^3J_{\text{HH}} = 8.2\text{ Hz}$  and  $^4J_{\text{HH}} = 1.4\text{ Hz}$ , 1H), 4.13 (bs, 2H), 2.01-1.85 (m, 2H), 1.84-1.58 (m, 8H), 1.39-1.08 (m, 12H).  $^{13}\text{C}\{^1\text{H}\}$  NMR ( $\text{CDCl}_3$ ):  $\delta$  153.6, 145.8, 134.8, 134.3, 129.6, 127.8, 109.3, 108.3, 102.6, 28.23, 28.18, 27.4, 27.2, 26.9, 25.3.

*t*BuLi (22.7 mL, 36.3 mmol; 1.60 M solution in pentane) was added dropwise over 10 min to a solution of 2-bromo-3-(dicyclohexyl(phenyl)silyloxy)aniline (5.35 g, 11.7 mmol) in THF (59 mL) at  $-78\text{ }^{\circ}\text{C}$ , and the mixture was stirred for 30 min at  $-78\text{ }^{\circ}\text{C}$  and for 40 min at room temperature. The reaction was quenched with  $\text{H}_2\text{O}$  at  $0\text{ }^{\circ}\text{C}$  (under nitrogen) and this was extracted with  $\text{Et}_2\text{O}$ . The organic layer was washed with saturated NaCl<sub>aq</sub>, dried over  $\text{MgSO}_4$ , filtered, and concentrated under vacuum. The resulting solid was washed with hexane to afford 3-amino-2-(dicyclohexyl(phenyl)silyl)phenol as a white solid (3.51 g, 9.24 mmol; 79% yield).

$^1\text{H}$  NMR ( $\text{CDCl}_3$ ):  $\delta$  7.67-7.54 (m, 2H), 7.46-7.33 (m, 3H), 7.03 (t,  $^3J_{\text{HH}} = 7.8\text{ Hz}$ , 1H), 6.15 (d,  $^3J_{\text{HH}} = 7.8\text{ Hz}$ , 1H), 6.12 (d,  $^3J_{\text{HH}} = 7.8\text{ Hz}$ , 1H), 4.81 (s, 1H), 3.65 (bs, 2H), 1.97-1.81 (m, 2H), 1.80-1.46 (m, 10H), 1.35-1.01 (m, 8H), 0.99-0.80 (m, 2H).  $^{13}\text{C}\{^1\text{H}\}$  NMR ( $\text{CDCl}_3$ ):  $\delta$  163.0, 154.8, 135.8, 134.4, 131.7, 129.6, 128.2, 108.9, 105.3, 102.0, 28.5, 28.3, 27.9, 27.5, 27.0, 23.8.

NaH (739 mg, 18.5 mmol; 60 wt% in mineral oil) was added to a solution of 3-amino-2-(dicyclohexyl(phenyl)silyl)phenol (3.51 g, 9.24 mmol) in THF (46 mL) at  $0\text{ }^{\circ}\text{C}$ , and the mixture was stirred for 10 min at  $0\text{ }^{\circ}\text{C}$ . *N*-Phenylbis(trifluoromethanesulfonimide) (3.96 g, 11.1 mmol) was added

to it and the mixture was stirred for 1.5 h at room temperature. The reaction was quenched with H<sub>2</sub>O and this was extracted with Et<sub>2</sub>O. The organic layer was washed with saturated NaCl<sub>aq</sub>, dried over MgSO<sub>4</sub>, filtered, and concentrated under vacuum. The residue was chromatographed on silica gel with hexane/EtOAc = 20/1 → 5/1 and then with hexane/CH<sub>2</sub>Cl<sub>2</sub> = 10/1 → 3/1 to afford 3-amino-2-(dicyclohexyl(phenyl)silyl)phenyl trifluoromethanesulfonate as a white solid (3.86 g, 7.54 mmol; 82% yield).

<sup>1</sup>H NMR (CDCl<sub>3</sub>): δ 7.58-7.48 (m, 2H), 7.46-7.33 (m, 3H), 7.20 (t, <sup>3</sup>J<sub>HH</sub> = 8.3 Hz, 1H), 6.77 (d, <sup>3</sup>J<sub>HH</sub> = 8.2 Hz, 1H), 6.45 (d, <sup>3</sup>J<sub>HH</sub> = 8.2 Hz, 1H), 3.76 (bs, 2H), 1.95-1.52 (m, 12H), 1.40-1.20 (m, 4H), 1.20-0.99 (m, 4H), 0.99-0.80 (m, 2H). <sup>13</sup>C{<sup>1</sup>H} NMR (CDCl<sub>3</sub>): δ 158.2, 155.3, 135.6, 133.0, 131.9, 129.8, 128.2, 118.8 (q, <sup>1</sup>J<sub>CF</sub> = 321 Hz), 115.0, 107.6 (q, <sup>5</sup>J<sub>CF</sub> = 2.6 Hz), 107.1, 28.2, 28.03, 27.96, 27.5, 26.9, 23.1.

Et<sub>3</sub>N (258 μL, 1.85 mmol) and 4-methoxybenzoyl chloride (250 μL, 1.85 mmol) were added to a solution of 3-amino-2-(dicyclohexyl(phenyl)silyl)phenyl trifluoromethanesulfonate (902 mg, 1.76 mmol) in 1,2-dichloroethane (3.5 mL) at room temperature, and the mixture was stirred for 17 h at 60 °C. The reaction was quenched with saturated NaHCO<sub>3</sub>aq and this was extracted with Et<sub>2</sub>O. The organic layer was washed with saturated NaCl<sub>aq</sub>, dried over MgSO<sub>4</sub>, filtered, and concentrated under vacuum. The residue was chromatographed on silica gel with hexane/EtOAc = 5/1 to afford compound **1c** as a white solid (826 mg, 1.28 mmol; 88% yield).

<sup>1</sup>H NMR (CDCl<sub>3</sub>): δ 7.97 (d, <sup>3</sup>J<sub>HH</sub> = 8.0 Hz, 1H), 7.93 (s, 1H), 7.57-7.45 (m, 6H), 7.28-7.23 (m, 1H), 6.70 (d, <sup>3</sup>J<sub>HH</sub> = 8.7 Hz, 2H), 6.63 (d, <sup>3</sup>J<sub>HH</sub> = 8.8 Hz, 2H), 3.82 (s, 3H), 1.89-1.80 (m, 2H), 1.72-1.52 (m, 10H), 1.35-1.16 (m, 4H), 1.10-0.96 (m, 4H), 0.85-0.73 (m, 2H). <sup>13</sup>C{<sup>1</sup>H} NMR (CDCl<sub>3</sub>): δ 165.0, 162.3, 157.0, 145.6, 135.6, 132.8, 131.8, 130.4, 129.2, 128.6, 126.2, 124.1, 118.7 (q, <sup>1</sup>J<sub>CF</sub> = 320 Hz), 117.2, 115.0 (q, <sup>5</sup>J<sub>CF</sub> = 2.9 Hz), 113.6, 55.4, 28.0, 27.7, 27.4, 27.2, 26.6, 22.6. HRMS (FAB) calcd for C<sub>33</sub>H<sub>39</sub>F<sub>3</sub>NO<sub>5</sub>SSi (M+H<sup>+</sup>) 646.2265, found 646.2271.

## 2-(*tert*-Butyldiphenylsilyl)-3-(3,3-diisopropylureido)phenyl trifluoromethanesulfonate (**1dd**)

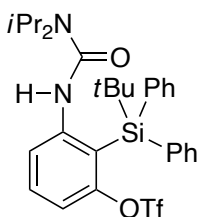

3-Amino-2-(*tert*-butyldiphenylsilyl)phenyl trifluoromethanesulfonate (528 mg, 1.10 mmol) was added dropwise over 2.5 h to a solution of bis(trichloromethyl) carbonate (163 mg, 0.550 mmol) and Et<sub>3</sub>N (15.3 μL, 0.110 mmol) in 1,2-dichloroethane (3.0 mL) at 0 °C. The mixture was stirred for 2 h at room temperature and for 4 h at 85 °C. The volatiles were removed under vacuum and the residue was dissolved in 1,2-dichloroethane (5.5 mL). *i*Pr<sub>2</sub>NH (233 μL, 1.65 mmol) was added to the solution and the mixture was stirred for 18 h at 85 °C, and this was concentrated under vacuum. The residue was chromatographed on silica gel with hexane/EtOAc = 10/1 → 4/1 to afford compound **1dd** as a yellow

solid (415 mg, 0.680 mmol; 62% yield).

$^1\text{H}$  NMR ( $\text{CDCl}_3$ ):  $\delta$  7.68-7.62 (m, 5H), 7.44 (t,  $^3J_{\text{HH}} = 8.4$  Hz, 1H), 7.42-7.34 (m, 6H), 7.10 (d,  $^3J_{\text{HH}} = 8.5$  Hz, 1H), 6.39 (s, 1H), 2.84 (sept,  $^3J_{\text{HH}} = 6.6$  Hz, 2H), 1.25 (s, 9H), 0.99 (d,  $^3J_{\text{HH}} = 6.5$  Hz, 12H).  $^{13}\text{C}\{^1\text{H}\}$  NMR ( $\text{CDCl}_3$ ):  $\delta$  156.5, 153.5, 147.5, 135.9, 134.9, 131.3, 129.8, 128.5, 124.2, 118.5 (q,  $^1J_{\text{CF}} = 322$  Hz), 117.3, 114.1 (q,  $^5J_{\text{CF}} = 1.9$  Hz), 46.5, 29.6, 21.2, 20.3. HRMS (FAB) calcd for  $\text{C}_{30}\text{H}_{38}\text{F}_3\text{N}_2\text{O}_4\text{SSi}$  ( $\text{M}+\text{H}^+$ ) 607.2268, found 607.2275.

### 3-(Benzyloxycarbonylamino)-2-(*tert*-butyldiphenylsilyl)phenyl trifluoromethanesulfonate (**1ee**)

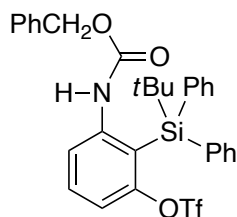

3-Amino-2-(*tert*-butyldiphenylsilyl)phenyl trifluoromethanesulfonate (528 mg, 1.10 mmol) was added dropwise over 2.5 h to a solution of bis(trichloromethyl) carbonate (163 mg, 0.550 mmol) and  $\text{Et}_3\text{N}$  (15.3  $\mu\text{L}$ , 0.110 mmol) in 1,2-dichloroethane (3.0 mL) at 0  $^\circ\text{C}$ . The mixture was stirred for 2.5 h at room temperature and for 4.5 h at 85  $^\circ\text{C}$ . The volatiles were removed under vacuum and the residue was dissolved in 1,2-dichloroethane (5.5 mL).  $\text{Et}_3\text{N}$  (30.7  $\mu\text{L}$ , 0.220 mmol) and benzyl alcohol (140  $\mu\text{L}$ , 1.32 mmol) were added to the solution and the mixture was stirred for 17 h at 85  $^\circ\text{C}$ , and this was concentrated under vacuum. The residue was chromatographed on silica gel with hexane/ $\text{EtOAc} = 20/1 \rightarrow 10/1$  to afford compound **1ee** as a yellow viscous oil (576 mg, 0.940 mmol; 85% yield).

$^1\text{H}$  NMR ( $\text{CDCl}_3$ ):  $\delta$  7.92 (d,  $^3J_{\text{HH}} = 8.2$  Hz, 1H), 7.68-7.62 (m, 4H), 7.50 (t,  $^3J_{\text{HH}} = 8.2$  Hz, 1H), 7.40-7.29 (m, 9H), 7.23-7.16 (m, 3H), 6.83 (s, 1H), 4.90 (s, 2H), 1.30 (s, 9H).  $^{13}\text{C}\{^1\text{H}\}$  NMR ( $\text{CDCl}_3$ ):  $\delta$  156.4, 153.3, 145.8, 136.0, 135.6, 134.4, 132.3, 130.0, 128.7, 128.5, 128.3, 128.2, 121.3, 118.4 (q,  $^1J_{\text{CF}} = 321$  Hz), 117.0, 114.5 (q,  $^5J_{\text{CF}} = 2.9$  Hz), 66.8, 29.5, 20.1. HRMS (FAB) calcd for  $\text{C}_{31}\text{H}_{31}\text{F}_3\text{NO}_5\text{SSi}$  ( $\text{M}+\text{H}^+$ ) 614.1639, found 614.1651.

### 3-(*tert*-Butoxycarbonylamino)-2-(*tert*-butyldiphenylsilyl)phenyl trifluoromethanesulfonate (**1ff**)

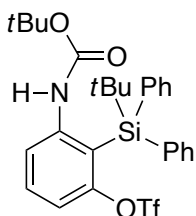

3-Amino-2-(*tert*-butyldiphenylsilyl)phenyl trifluoromethanesulfonate (528 mg, 1.10 mmol) was added dropwise over 2.5 h to a solution of bis(trichloromethyl) carbonate (163 mg, 0.550 mmol) and  $\text{Et}_3\text{N}$  (15.3  $\mu\text{L}$ , 0.110 mmol) in 1,2-dichloroethane (3.0 mL) at 0  $^\circ\text{C}$ . The mixture was stirred for 2 h at room temperature and for 4 h at 85  $^\circ\text{C}$ . The volatiles were removed under vacuum and the residue was dissolved in *tert*-butyl alcohol (3.00 g, 40.5 mmol). The solution was stirred for 18 h at 85  $^\circ\text{C}$  and this

was concentrated under vacuum. The residue was chromatographed on silica gel with hexane/EtOAc = 20/1 to afford compound **1ff** as a white solid (320 mg, 0.551 mmol; 50% yield).

$^1\text{H}$  NMR ( $\text{CDCl}_3$ ):  $\delta$  7.90 (d,  $^3J_{\text{HH}} = 8.2$  Hz, 1H), 7.71-7.64 (m, 4H), 7.46 (t,  $^3J_{\text{HH}} = 8.3$  Hz, 1H), 7.44-7.34 (m, 6H), 7.13 (d,  $^3J_{\text{HH}} = 8.2$  Hz, 1H), 6.64 (s, 1H), 1.31 (s, 9H), 1.29 (s, 9H).  $^{13}\text{C}\{^1\text{H}\}$  NMR ( $\text{CDCl}_3$ ):  $\delta$  156.5, 152.5, 146.4, 135.7, 134.5, 132.1, 130.0, 128.6, 121.0, 118.4 (q,  $^1J_{\text{CF}} = 321$  Hz), 116.3, 114.0 (q,  $^5J_{\text{CF}} = 2.6$  Hz), 80.4, 29.5, 28.2, 20.2. HRMS (FAB) calcd for  $\text{C}_{28}\text{H}_{32}\text{F}_3\text{NO}_5\text{SSi}$  ( $\text{M}^+$ ) 579.1717, found 579.1718.

**(R)-2-(tert-Butyl(methyl)(phenyl)silyl)-3-(4-methylbenzamido)phenyl trifluoromethanesulfonate (1gg)**

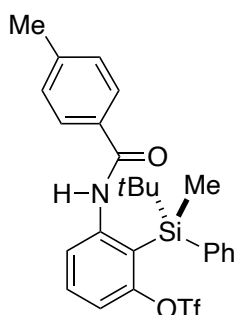

MeLi (6.26 mL, 8.57 mmol; 1.37 M solution in cyclopentyl methyl ether) was added dropwise over 15 min to a solution of *tert*-butyldichloro(phenyl)silane (1.80 mL, 8.57 mmol) in THF (34 mL) at  $-78$  °C, and the mixture was stirred for 1.5 h at room temperature. 3-Amino-2-bromophenol (1.46 g, 7.79 mmol) and imidazole (1.35 g, 19.5 mmol) were added to it and the mixture was stirred for 2.5 h at 60 °C. The reaction was quenched with  $\text{H}_2\text{O}$  and this was extracted with  $\text{Et}_2\text{O}$ . The organic layer was washed with saturated NaCl<sub>aq</sub>, dried over  $\text{MgSO}_4$ , filtered, and concentrated under vacuum. The residue was chromatographed on silica gel with hexane/EtOAc = 5/1 to afford 2-bromo-3-(*tert*-butyl(methyl)(phenyl)silyloxy)aniline as a colorless oil (1.93 g, 5.31 mmol; 68% yield).

$^1\text{H}$  NMR ( $\text{CDCl}_3$ ):  $\delta$  7.63-7.57 (m, 2H), 7.44-7.33 (m, 3H), 6.78 (t,  $^3J_{\text{HH}} = 8.2$  Hz, 1H), 6.34 (dd,  $^3J_{\text{HH}} = 8.2$  Hz and  $^4J_{\text{HH}} = 1.4$  Hz, 1H), 6.06 (dd,  $^3J_{\text{HH}} = 8.2$  Hz and  $^4J_{\text{HH}} = 1.4$  Hz, 1H), 4.13 (bs, 2H), 1.05 (s, 9H), 0.53 (s, 3H).  $^{13}\text{C}\{^1\text{H}\}$  NMR ( $\text{CDCl}_3$ ):  $\delta$  153.3, 145.9, 134.8, 134.6, 129.9, 127.9, 127.8, 109.1, 108.4, 102.6, 25.9, 18.9,  $-6.4$ .

*t*BuLi (10.3 mL, 16.5 mmol; 1.60 M solution in pentane) was added dropwise over 10 min to a solution of 2-bromo-3-(*tert*-butyl(methyl)(phenyl)silyloxy)aniline (1.93 g, 5.31 mmol) in THF (27 mL) at  $-78$  °C, and the mixture was stirred for 1 h at  $-78$  °C and for 2 h at 0 °C. The reaction was quenched with  $\text{H}_2\text{O}$  at 0 °C (under nitrogen) and this was extracted with  $\text{Et}_2\text{O}$ . The organic layer was washed with saturated NaCl<sub>aq</sub>, dried over  $\text{MgSO}_4$ , filtered, and concentrated under vacuum. The residue was chromatographed on silica gel with hexane/EtOAc = 5/1 to afford 3-amino-2-(*tert*-butyl(methyl)(phenyl)silyl)phenol (compound **S1**) as a colorless oil (1.34 g, 4.71 mmol; 89% yield). The enantiomers were separated by preparative HPLC using Daicel Chiralpak IBN-5 column (2 cm  $\varnothing$  x 25 cm) with hexane/2-propanol = 90/10, flow = 10.0 mL/min. Retention times: 9.8–10.3 min [(*S*)-

**S1**], 10.7–11.3 min [(*R*)-**S1**]. The ee of (*R*)-**S1** was determined on a Daicel Chiralcel OD-H column with hexane/2-propanol = 90/10, flow = 0.7 mL/min. Retention times: 6.9 min [(*S*)-enantiomer], 7.7 min [(*R*)-enantiomer]. >99% ee.  $[\alpha]^{23}_D -87.9$  (*c* 0.31, CHCl<sub>3</sub>).

<sup>1</sup>H NMR (CDCl<sub>3</sub>): δ 7.78-7.72 (m, 2H), 7.42-7.34 (m, 3H), 7.01 (t, <sup>3</sup>J<sub>HH</sub> = 7.8 Hz, 1H), 6.14-6.08 (m, 2H), 4.78 (s, 1H), 3.64 (bs, 2H), 1.20 (s, 9H), 0.62 (s, 3H). <sup>13</sup>C {<sup>1</sup>H} NMR (CDCl<sub>3</sub>): δ 162.6, 154.2, 138.9, 134.9, 131.8, 129.4, 128.6, 108.9, 105.5, 104.6, 27.9, 19.9, -0.6.

racemate

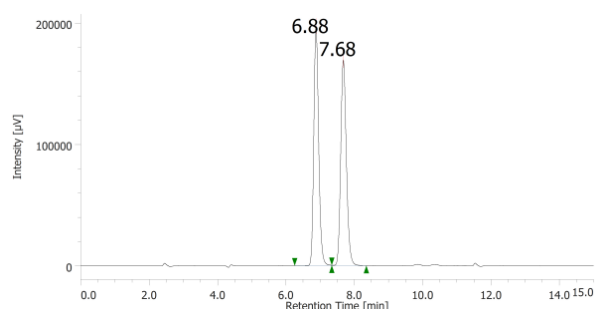

>99% ee (*R*)

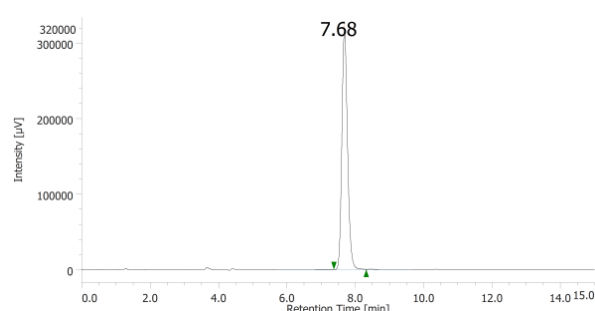

Et<sub>3</sub>N (104 μL, 0.750 mmol) and 4-methylbenzoyl chloride (89.8 μL, 0.680 mmol) were added to a solution of (*R*)-**S1** (194 mg, 0.680 mmol) in 1,2-dichloroethane (1.5 mL) at room temperature, and the mixture was stirred for 14 h at 60 °C. The reaction was quenched with saturated NaHCO<sub>3</sub> aq and this was extracted with Et<sub>2</sub>O. The organic layer was washed with saturated NaCl aq, dried over MgSO<sub>4</sub>, filtered, and concentrated under vacuum. The residue was chromatographed on silica gel with hexane/EtOAc = 3/1 to afford (*R*)-*N*-(2-(*tert*-butyl(methyl)(phenyl)silyl)-3-hydroxyphenyl)-4-methylbenzamide (compound (*R*)-**S2**) as a white solid (237 mg, 0.587 mmol; 86% yield). The absolute configuration was determined by X-ray crystallographic analysis after recrystallization from EtOAc/hexane.  $[\alpha]^{25}_D +2.1$  (*c* 0.54, CHCl<sub>3</sub>).

<sup>1</sup>H NMR (CDCl<sub>3</sub>): δ 7.77 (bs, 1H), 7.68-7.63 (m, 2H), 7.52-7.43 (m, 2H), 7.38 (t, <sup>3</sup>J<sub>HH</sub> = 7.3 Hz, 2H), 7.30 (t, <sup>3</sup>J<sub>HH</sub> = 8.0 Hz, 1H), 7.01 (d, <sup>3</sup>J<sub>HH</sub> = 8.2 Hz, 2H), 6.84 (d, <sup>3</sup>J<sub>HH</sub> = 8.3 Hz, 2H), 6.57 (d, <sup>3</sup>J<sub>HH</sub> = 8.2 Hz, 1H), 5.04 (s, 1H), 2.36 (s, 3H), 1.08 (s, 9H), 0.57 (s, 3H). <sup>13</sup>C {<sup>1</sup>H} NMR (CDCl<sub>3</sub>): δ 165.8, 162.6, 143.9, 141.9, 138.8, 134.8, 131.6, 131.5, 129.6, 129.3, 129.1, 127.0, 117.4, 113.3, 112.2, 27.6, 21.6, 19.5, 0.0.

NaH (28.2 mg, 0.705 mmol; 60 wt% in mineral oil) was added to a solution of (*R*)-**S2** (237 mg, 0.587 mmol) in THF (3.0 mL) at 0 °C, and the mixture was stirred for 20 min at 0 °C. *N*-Phenylbis(trifluoromethanesulfonimide) (241 mg, 0.675 mmol) was added to it and the mixture was stirred for 2 h at room temperature. The reaction was quenched with H<sub>2</sub>O and this was extracted with Et<sub>2</sub>O. The organic layer was washed with saturated NaCl aq, dried over MgSO<sub>4</sub>, filtered, and concentrated under vacuum. The residue was chromatographed on silica gel with hexane/EtOAc = 8/1 to afford compound (*R*)-**1gg** as a yellow oil (267 mg, 0.499 mmol; 85% yield).  $[\alpha]^{24}_D +25.3$  (*c* 0.58, CHCl<sub>3</sub>).

<sup>1</sup>H NMR (CDCl<sub>3</sub>): δ 7.94-7.87 (m, 2H), 7.66-7.60 (m, 2H), 7.56-7.50 (m, 2H), 7.43 (t, <sup>3</sup>J<sub>HH</sub> = 7.3 Hz, 2H), 7.29 (d, <sup>3</sup>J<sub>HH</sub> = 8.2 Hz, 1H), 7.01 (d, <sup>3</sup>J<sub>HH</sub> = 8.3 Hz, 2H), 6.76 (d, <sup>3</sup>J<sub>HH</sub> = 8.3 Hz, 2H), 2.37 (s,

3H), 1.06 (s, 9H), 0.65 (s, 3H).  $^{13}\text{C}\{^1\text{H}\}$  NMR ( $\text{CDCl}_3$ ):  $\delta$  165.4, 156.9, 144.7, 142.4, 136.9, 134.4, 131.8, 130.9, 130.1, 129.7, 129.1, 127.0, 124.3, 119.6, 118.7 (q,  $^1J_{\text{CF}} = 320$  Hz), 115.4, 27.5, 21.5, 19.5, 0.2. HRMS (FAB) calcd for  $\text{C}_{26}\text{H}_{29}\text{F}_3\text{NO}_4\text{SSi}$  ( $\text{M}+\text{H}^+$ ) 536.1533, found 536.1535.

#### Analytical Data for Other Substrates:

#### 2-(*tert*-Butyldiphenylsilyl)-3-(4-methoxybenzamido)phenyl trifluoromethanesulfonate (1b)

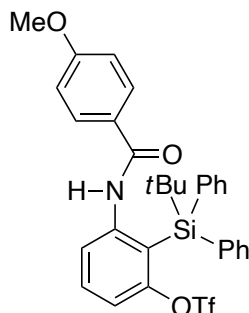

$^1\text{H}$  NMR ( $\text{CDCl}_3$ ):  $\delta$  8.04 (dd,  $^3J_{\text{HH}} = 8.3$  Hz and  $^4J_{\text{HH}} = 0.9$  Hz, 1H), 8.01 (bs, 1H), 7.70-7.66 (m, 4H), 7.56 (t,  $^3J_{\text{HH}} = 8.4$  Hz, 1H), 7.44-7.39 (m, 2H), 7.39-7.34 (m, 4H), 7.25 (d,  $^3J_{\text{HH}} = 8.5$  Hz, 1H), 6.83-6.79 (m, 2H), 6.69-6.64 (m, 2H), 3.82 (s, 3H), 1.23 (s, 9H).  $^{13}\text{C}\{^1\text{H}\}$  NMR ( $\text{CDCl}_3$ ):  $\delta$  164.9, 162.5, 156.7, 145.4, 135.8, 134.5, 132.0, 130.0, 128.8, 126.1, 124.0, 118.7, 118.5 (q,  $^1J_{\text{CF}} = 321$  Hz), 115.6 (q,  $^5J_{\text{CF}} = 1.9$  Hz), 113.6, 55.4, 29.4, 20.4. HRMS (FAB) calcd for  $\text{C}_{31}\text{H}_{31}\text{F}_3\text{NO}_5\text{SSi}$  ( $\text{M}+\text{H}^+$ ) 614.1639, found 614.1643.

#### 2-(Dicyclohexyl(4-methoxyphenyl)silyl)-3-(4-methoxybenzamido)phenyl trifluoromethanesulfonate (1d)

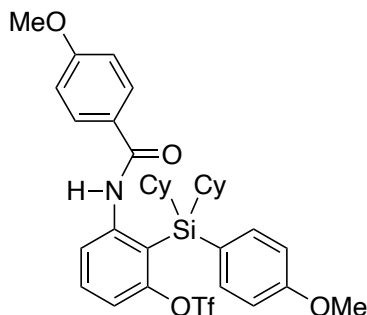

$^1\text{H}$  NMR ( $\text{CDCl}_3$ ):  $\delta$  8.13 (s, 1H), 8.00 (d,  $^3J_{\text{HH}} = 8.2$  Hz, 1H), 7.52 (t,  $^3J_{\text{HH}} = 8.2$  Hz, 1H), 7.42 (d,  $^3J_{\text{HH}} = 8.7$  Hz, 2H), 7.23 (d,  $^3J_{\text{HH}} = 7.8$  Hz, 1H), 6.98 (d,  $^3J_{\text{HH}} = 8.2$  Hz, 2H), 6.80 (d,  $^3J_{\text{HH}} = 8.7$  Hz, 2H), 6.65 (d,  $^3J_{\text{HH}} = 8.7$  Hz, 2H), 3.86 (s, 3H), 3.82 (s, 3H), 1.88-1.77 (m, 2H), 1.74-1.50 (m, 10H), 1.36-1.15 (m, 4H), 1.11-0.96 (m, 4H), 0.86-0.71 (m, 2H).  $^{13}\text{C}\{^1\text{H}\}$  NMR ( $\text{CDCl}_3$ ):  $\delta$  165.1, 162.3, 161.6, 157.0, 145.8, 137.1, 131.8, 128.7, 126.5, 123.5, 122.9, 118.7 (q,  $^1J_{\text{CF}} = 320$  Hz), 116.9, 115.0, 114.8 (q,  $^5J_{\text{CF}} = 2.6$  Hz), 113.5, 55.4, 55.2, 28.0, 27.8, 27.4, 27.3, 26.6, 22.9. HRMS (FAB) calcd for  $\text{C}_{34}\text{H}_{41}\text{F}_3\text{NO}_6\text{SSi}$  ( $\text{M}+\text{H}^+$ ) 676.2370, found 676.2367.



**2-(Dicyclohexyl(4-(phenylethynyl)phenyl)silyl)-3-(4-methoxybenzamido)phenyl trifluoromethanesulfonate (1e)**

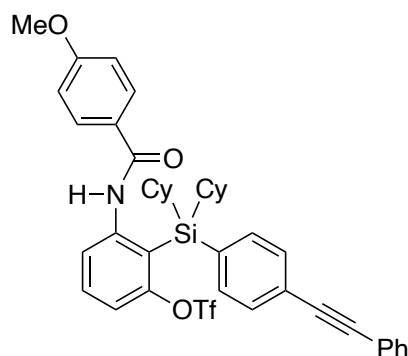

$^1\text{H}$  NMR ( $\text{CDCl}_3$ ):  $\delta$  7.95 (dd,  $^3J_{\text{HH}} = 8.3$  Hz and  $^4J_{\text{HH}} = 0.9$  Hz, 1H), 7.79 (s, 1H), 7.62-7.53 (m, 5H), 7.48 (d,  $^3J_{\text{HH}} = 8.2$  Hz, 2H), 7.43-7.35 (m, 3H), 7.26 (dd,  $^3J_{\text{HH}} = 8.2$  Hz and  $^4J_{\text{HH}} = 0.9$  Hz, 1H), 6.82 (d,  $^3J_{\text{HH}} = 9.2$  Hz, 2H), 6.74 (d,  $^3J_{\text{HH}} = 9.2$  Hz, 2H), 3.77 (s, 3H), 1.91-1.79 (m, 2H), 1.75-1.55 (m, 10H), 1.36-1.16 (m, 4H), 1.13-0.98 (m, 4H), 0.88-0.74 (m, 2H).  $^{13}\text{C}\{^1\text{H}\}$  NMR ( $\text{CDCl}_3$ ):  $\delta$  165.2, 162.5, 157.0, 145.5, 135.4, 133.2, 132.02, 132.00, 131.8, 128.8, 128.6, 128.5, 126.3, 125.5, 124.0, 122.9, 118.7 (q,  $^1J_{\text{CF}} = 320$  Hz), 116.7, 115.0 (q,  $^5J_{\text{CF}} = 2.9$  Hz), 113.8, 91.6, 88.8, 55.4, 28.0, 27.7, 27.4, 27.2, 26.6, 22.7. HRMS (FAB) calcd for  $\text{C}_{41}\text{H}_{43}\text{F}_3\text{NO}_5\text{SSi}$  ( $\text{M}+\text{H}^+$ ) 746.2578, found 746.2579.

**2-(Dicyclohexyl(4-fluorophenyl)silyl)-3-(4-methoxybenzamido)phenyl trifluoromethanesulfonate (1f)**

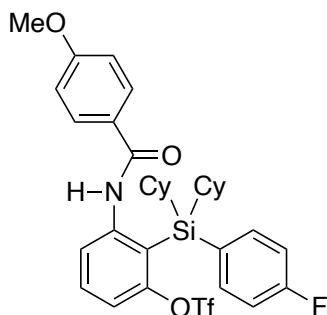

$^1\text{H}$  NMR ( $\text{CDCl}_3$ ):  $\delta$  7.95 (d,  $^3J_{\text{HH}} = 7.6$  Hz, 1H), 7.77 (s, 1H), 7.55 (t,  $^3J_{\text{HH}} = 8.4$  Hz, 1H), 7.46 (dd,  $^3J_{\text{HH}} = 8.5$  Hz and  $^4J_{\text{HF}} = 6.1$  Hz, 2H), 7.27-7.23 (m, 1H), 7.14 (t,  $^3J = 8.8$  Hz, 2H), 6.84 (d,  $^3J_{\text{HH}} = 8.8$  Hz, 2H), 6.70 (d,  $^3J_{\text{HH}} = 9.0$  Hz, 2H), 3.83 (s, 3H), 1.87-1.78 (m, 2H), 1.75-1.49 (m, 10H), 1.35-1.17 (m, 4H), 1.09-0.97 (m, 4H), 0.85-0.72 (m, 2H).  $^{13}\text{C}\{^1\text{H}\}$  NMR ( $\text{CDCl}_3$ ):  $\delta$  165.2, 164.5 (d,  $^1J_{\text{CF}} = 252$  Hz), 162.5, 156.9, 145.5, 137.5 (d,  $^3J_{\text{CF}} = 6.7$  Hz), 132.0, 128.4, 128.3 (d,  $^4J_{\text{CF}} = 3.8$  Hz), 126.4, 124.0, 118.7 (q,  $^1J_{\text{CF}} = 320$  Hz), 116.7, 116.4 (d,  $^2J_{\text{CF}} = 20.1$  Hz), 115.1 (q,  $^5J_{\text{CF}} = 1.9$  Hz), 113.7, 55.5, 28.0, 27.7, 27.4, 27.2, 26.6, 22.7. HRMS (FAB) calcd for  $\text{C}_{33}\text{H}_{38}\text{F}_4\text{NO}_5\text{SSi}$  ( $\text{M}+\text{H}^+$ ) 664.2171, found 664.2181.

**2-((4-Chlorophenyl)dicyclohexylsilyl)-3-(4-methoxybenzamido)phenyl trifluoromethanesulfonate (1g)**

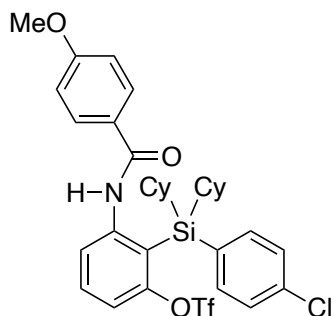

$^1\text{H}$  NMR ( $\text{CDCl}_3$ ):  $\delta$  7.93 (d,  $^3J_{\text{HH}} = 8.2$  Hz, 1H), 7.68 (s, 1H), 7.55 (t,  $^3J_{\text{HH}} = 8.2$  Hz, 1H), 7.45-7.37 (m, 4H), 7.25 (d,  $^3J_{\text{HH}} = 8.7$  Hz, 1H), 6.83 (d,  $^3J_{\text{HH}} = 9.2$  Hz, 2H), 6.73 (d,  $^3J_{\text{HH}} = 8.7$  Hz, 2H), 3.85 (s, 3H), 1.89-1.78 (m, 2H), 1.75-1.53 (m, 10H), 1.36-1.15 (m, 4H), 1.12-0.97 (m, 4H), 0.86-0.71 (m, 2H).  $^{13}\text{C}\{^1\text{H}\}$  NMR ( $\text{CDCl}_3$ ):  $\delta$  165.2, 162.5, 156.9, 145.4, 136.9, 136.7, 132.1, 131.3, 129.4, 128.4, 126.3, 124.1, 118.6 (q,  $^1J_{\text{CF}} = 320$  Hz), 116.5, 115.1 (q,  $^5J_{\text{CF}} = 2.6$  Hz), 113.7, 55.5, 28.0, 27.7, 27.4, 27.2, 26.5, 22.7. HRMS (FAB) calcd for  $\text{C}_{33}\text{H}_{38}\text{ClF}_3\text{NO}_5\text{SSi}$  ( $\text{M}+\text{H}^+$ ) 680.1875, found 680.1883.

**2-(Dicyclohexyl(4-(trifluoromethyl)phenyl)silyl)-3-(4-methoxybenzamido)phenyl trifluoromethanesulfonate (1h)**

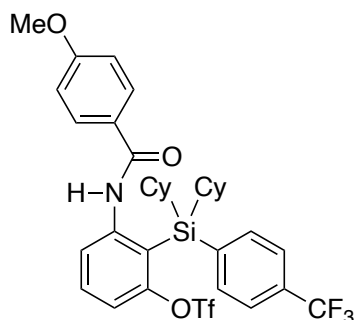

$^1\text{H}$  NMR ( $\text{CDCl}_3$ ):  $\delta$  7.89 (d,  $^3J_{\text{HH}} = 8.3$  Hz, 1H), 7.64 (d,  $^3J_{\text{HH}} = 8.3$  Hz, 2H), 7.62-7.53 (m, 3H), 7.45 (s, 1H), 7.28 (d,  $^3J_{\text{HH}} = 8.2$  Hz, 1H), 6.80 (d,  $^3J_{\text{HH}} = 8.7$  Hz, 2H), 6.66 (d,  $^3J_{\text{HH}} = 8.7$  Hz, 2H), 3.81 (s, 3H), 1.92-1.80 (m, 2H), 1.76-1.53 (m, 10H), 1.38-1.19 (m, 4H), 1.13-0.97 (m, 4H), 0.86-0.72 (m, 2H).  $^{13}\text{C}\{^1\text{H}\}$  NMR ( $\text{CDCl}_3$ ):  $\delta$  165.1, 162.6, 156.9, 145.3, 138.3, 135.6, 132.3, 132.1 (q,  $^2J_{\text{CF}} = 31.6$  Hz), 128.3, 126.1, 125.4 (q,  $^3J_{\text{CF}} = 3.5$  Hz), 124.6, 124.0 (q,  $^1J_{\text{CF}} = 272$  Hz), 118.7 (q,  $^1J_{\text{CF}} = 320$  Hz), 116.7, 115.4 (q,  $^5J_{\text{CF}} = 2.6$  Hz), 113.7, 55.4, 28.0, 27.7, 27.5, 27.2, 26.5, 22.6. HRMS (FAB) calcd for  $\text{C}_{34}\text{H}_{38}\text{F}_6\text{NO}_5\text{SSi}$  ( $\text{M}+\text{H}^+$ ) 714.2139, found 714.2139.

**2-((4-Acetylphenyl)dicyclohexylsilyl)-3-(4-methoxybenzamido)phenyl trifluoromethanesulfonate (1i)**

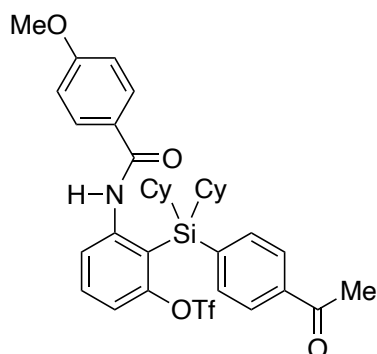

$^1\text{H}$  NMR ( $\text{CDCl}_3$ ):  $\delta$  7.92 (d,  $^3J_{\text{HH}} = 8.2$  Hz, 1H), 7.89 (d,  $^3J_{\text{HH}} = 8.2$  Hz, 2H), 7.62-7.53 (m, 3H), 7.47 (s, 1H), 7.28 (d,  $^3J_{\text{HH}} = 8.2$  Hz, 1H), 6.81 (d,  $^3J_{\text{HH}} = 8.7$  Hz, 2H), 6.59 (d,  $^3J_{\text{HH}} = 8.7$  Hz, 2H), 3.80 (s, 3H), 2.58 (s, 3H), 1.92-1.79 (m, 2H), 1.76-1.54 (m, 10H), 1.38-1.19 (m, 4H), 1.14-0.97 (m, 4H), 0.89-0.72 (m, 2H).  $^{13}\text{C}\{^1\text{H}\}$  NMR ( $\text{CDCl}_3$ ):  $\delta$  197.8, 165.0, 162.4, 156.9, 145.3, 139.5, 138.1, 135.5, 132.1, 128.4, 128.1, 126.1, 124.3, 118.7 (q,  $^1J_{\text{CF}} = 320$  Hz), 116.5, 115.2 (q,  $^5J_{\text{CF}} = 1.9$  Hz), 113.6, 55.4, 27.9, 27.63, 27.55, 27.2, 26.6, 26.5, 22.7. HRMS (FAB) calcd for  $\text{C}_{35}\text{H}_{41}\text{F}_3\text{NO}_6\text{SSi}$  ( $\text{M}+\text{H}^+$ ) 688.2370, found 688.2379.

**2-(Dicyclohexyl(3-dimethylaminophenyl)silyl)-3-(4-methoxybenzamido)phenyl trifluoromethanesulfonate (1j)**

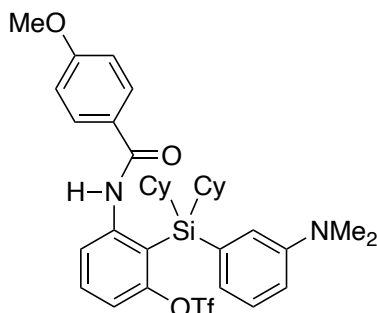

$^1\text{H}$  NMR ( $\text{CDCl}_3$ ):  $\delta$  8.19 (s, 1H), 7.94 (d,  $^3J_{\text{HH}} = 7.8$  Hz, 1H), 7.52 (t,  $^3J_{\text{HH}} = 8.2$  Hz, 1H), 7.33 (t,  $^3J_{\text{HH}} = 7.8$  Hz, 1H), 7.24 (d,  $^3J_{\text{HH}} = 8.2$  Hz, 1H), 6.89-6.81 (m, 2H), 6.81-6.75 (m, 3H), 6.64 (d,  $^3J_{\text{HH}} = 9.2$  Hz, 2H), 3.82 (s, 3H), 2.91 (s, 6H), 1.88-1.79 (m, 2H), 1.75-1.50 (m, 10H), 1.37-0.99 (m, 8H), 0.91-0.76 (m, 2H).  $^{13}\text{C}\{^1\text{H}\}$  NMR ( $\text{CDCl}_3$ ):  $\delta$  165.1, 162.2, 157.0, 150.7, 145.7, 132.9, 131.6, 130.0, 128.8, 126.3, 124.1, 123.0, 118.71 (q,  $^1J_{\text{CF}} = 320$  Hz), 118.69, 117.8, 114.9 (q,  $^5J_{\text{CF}} = 1.9$  Hz), 114.1, 113.5, 55.4, 40.5, 28.1, 27.8, 27.44, 27.36, 26.6, 22.9. HRMS (FAB) calcd for  $\text{C}_{35}\text{H}_{44}\text{F}_3\text{N}_2\text{O}_5\text{SSi}$  ( $\text{M}+\text{H}^+$ ) 689.2687, found 689.2694.

**2-(Dicyclohexyl(3-tolyl)silyl)-3-(4-methoxybenzamido)phenyl trifluoromethanesulfonate (1k)**

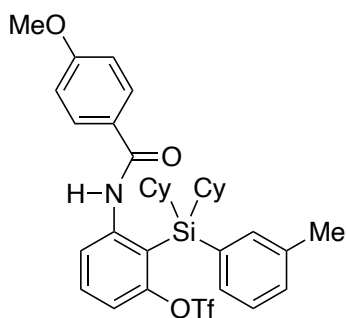

$^1\text{H}$  NMR ( $\text{CDCl}_3$ ):  $\delta$  7.98 (s, 1H), 7.95 (d,  $^3J_{\text{HH}} = 8.2$  Hz, 1H), 7.53 (t,  $^3J_{\text{HH}} = 8.2$  Hz, 1H), 7.40-7.22 (m, 5H), 6.71 (d,  $^3J_{\text{HH}} = 8.7$  Hz, 2H), 6.64 (d,  $^3J_{\text{HH}} = 8.7$  Hz, 2H), 3.82 (s, 3H), 2.36 (s, 3H), 1.90-1.78 (m, 2H), 1.74-1.50 (m, 10H), 1.37-1.14 (m, 4H), 1.12-0.97 (m, 4H), 0.86-0.71 (m, 2H).  $^{13}\text{C}\{^1\text{H}\}$  NMR ( $\text{CDCl}_3$ ):  $\delta$  165.0, 162.3, 157.0, 145.6, 138.7, 135.9, 132.6, 132.5, 131.7, 131.2, 129.1, 128.6, 126.2, 124.0, 118.7 (q,  $^1J_{\text{CF}} = 320$  Hz), 117.3, 114.9 (q,  $^5J_{\text{CF}} = 2.9$  Hz), 113.5, 55.4, 28.0, 27.7, 27.33, 27.26, 26.6, 22.6, 21.8. HRMS (FAB) calcd for  $\text{C}_{34}\text{H}_{41}\text{F}_3\text{NO}_5\text{SSi}$  ( $\text{M}+\text{H}^+$ ) 660.2421, found 660.2435.

**2-(Dicyclohexyl(3,5-dimethoxyphenyl)silyl)-3-(4-methoxybenzamido)phenyl trifluoromethanesulfonate (1l)**

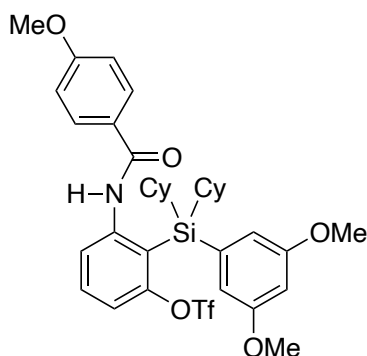

$^1\text{H}$  NMR ( $\text{CDCl}_3$ ):  $\delta$  7.920 (s, 1H), 7.916 (dd,  $^3J_{\text{HH}} = 8.2$  Hz and  $^4J_{\text{HH}} = 0.9$  Hz, 1H), 7.53 (t,  $^3J_{\text{HH}} = 8.2$  Hz, 1H), 7.25 (d,  $^3J_{\text{HH}} = 8.2$  Hz, 1H), 6.91 (d,  $^3J_{\text{HH}} = 9.2$  Hz, 2H), 6.70 (d,  $^3J_{\text{HH}} = 8.7$  Hz, 2H), 6.57 (d,  $^4J_{\text{HH}} = 2.3$  Hz, 2H), 6.48 (t,  $^4J_{\text{HH}} = 2.3$  Hz, 1H), 3.83 (s, 3H), 3.73 (s, 6H), 1.89-1.78 (m, 2H), 1.75-1.53 (m, 10H), 1.36-0.99 (m, 8H), 0.93-0.76 (m, 2H).  $^{13}\text{C}\{^1\text{H}\}$  NMR ( $\text{CDCl}_3$ ):  $\delta$  165.1, 162.3, 161.3, 156.8, 145.5, 134.8, 131.7, 128.5, 126.2, 124.2, 118.6 (q,  $^1J_{\text{CF}} = 320$  Hz), 117.2, 114.9 (q,  $^5J_{\text{CF}} = 1.9$  Hz), 113.4, 112.6, 101.6, 55.29, 55.26, 27.9, 27.7, 27.4, 27.3, 26.5, 22.7. HRMS (FAB) calcd for  $\text{C}_{35}\text{H}_{43}\text{F}_3\text{NO}_7\text{SSi}$  ( $\text{M}+\text{H}^+$ ) 706.2476, found 706.2482.

## 2-(Dicyclohexyl(2-tolyl)silyl)-3-(4-methoxybenzamido)phenyl trifluoromethanesulfonate (1m)

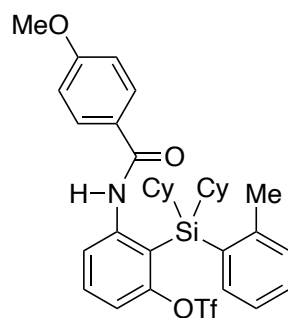

$^1\text{H}$  NMR ( $\text{CDCl}_3$ ):  $\delta$  8.18 (s, 1H), 8.05 (d,  $^3J_{\text{HH}} = 8.2$  Hz, 1H), 7.52 (t,  $^3J_{\text{HH}} = 8.5$  Hz, 1H), 7.49-7.41 (m, 2H), 7.36-7.20 (m, 3H), 6.71 (d,  $^3J_{\text{HH}} = 8.7$  Hz, 2H), 6.62 (d,  $^3J_{\text{HH}} = 8.7$  Hz, 2H), 3.81 (s, 3H), 2.22 (s, 3H), 1.99-1.86 (m, 2H), 1.80-1.50 (m, 10H), 1.38-1.14 (m, 4H), 1.14-0.94 (m, 4H), 0.94-0.70 (m, 2H).  $^{13}\text{C}\{^1\text{H}\}$  NMR ( $\text{CDCl}_3$ ):  $\delta$  165.0, 162.3, 155.9, 145.7, 145.2, 136.6, 132.0, 131.6, 131.1, 130.5, 128.5, 126.1, 123.1, 118.7 (q,  $^1J_{\text{CF}} = 321$  Hz), 118.4, 114.9 (q,  $^5J_{\text{CF}} = 2.9$  Hz), 113.6, 55.4, 28.1, 27.8, 27.4, 26.5, 24.0, 23.8. HRMS (FAB) calcd for  $\text{C}_{34}\text{H}_{41}\text{F}_3\text{NO}_5\text{SSi}$  ( $\text{M}+\text{H}^+$ ) 660.2421, found 660.2425.

## 2-(Dicyclohexyl(2-naphthyl)silyl)-3-(4-methoxybenzamido)phenyl trifluoromethanesulfonate (1n)

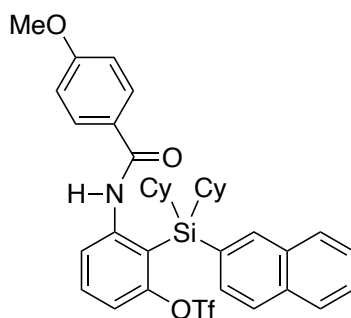

$^1\text{H}$  NMR ( $\text{CDCl}_3$ ):  $\delta$  8.01 (s, 1H), 7.98 (d,  $^3J_{\text{HH}} = 7.3$  Hz, 1H), 7.96-7.88 (m, 2H), 7.88-7.80 (m, 2H), 7.67-7.57 (m, 2H), 7.56 (t,  $^3J_{\text{HH}} = 8.2$  Hz, 1H), 7.52 (d,  $^3J_{\text{HH}} = 8.2$  Hz, 1H), 7.29 (d,  $^3J_{\text{HH}} = 8.2$  Hz, 1H), 6.38 (d,  $^3J_{\text{HH}} = 8.7$  Hz, 2H), 5.97 (d,  $^3J_{\text{HH}} = 8.7$  Hz, 2H), 3.60 (s, 3H), 1.99-1.86 (m, 2H), 1.86-1.52 (m, 10H), 1.40-0.94 (m, 8H), 0.91-0.76 (m, 2H).  $^{13}\text{C}\{^1\text{H}\}$  NMR ( $\text{CDCl}_3$ ):  $\delta$  165.1, 162.0, 157.0, 145.7, 136.6, 134.2, 133.4, 131.9, 131.1, 130.1, 128.72, 128.68, 128.1, 128.0, 127.4, 126.7, 125.9, 123.7, 118.7 (q,  $^1J_{\text{CF}} = 320$  Hz), 116.8, 114.9 (q,  $^5J_{\text{CF}} = 2.6$  Hz), 113.1, 55.1, 28.0, 27.8, 27.4, 26.5, 22.8. HRMS (FAB) calcd for  $\text{C}_{37}\text{H}_{41}\text{F}_3\text{NO}_5\text{SSi}$  ( $\text{M}+\text{H}^+$ ) 696.2421, found 696.2422.

**2-(Dicyclohexyl(1-methyl-1*H*-5-indolyl)silyl)-3-(4-methoxybenzamido)phenyl trifluoromethanesulfonate (1o)**

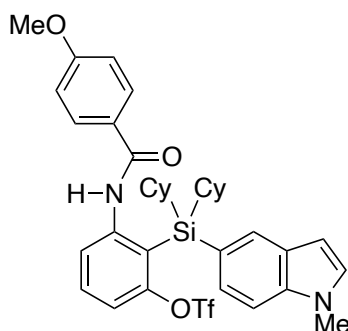

$^1\text{H}$  NMR ( $\text{CDCl}_3$ ):  $\delta$  8.29 (s, 1H), 8.05 (d,  $^3J_{\text{HH}} = 8.0$  Hz, 1H), 7.82 (s, 1H), 7.52 (t,  $^3J_{\text{HH}} = 8.3$  Hz, 1H), 7.38 (d,  $^3J_{\text{HH}} = 8.3$  Hz, 1H), 7.29 (d,  $^3J_{\text{HH}} = 8.1$  Hz, 1H), 7.28-7.22 (m, 1H), 7.16 (d,  $^3J_{\text{HH}} = 3.1$  Hz, 1H), 6.57 (d,  $^3J_{\text{HH}} = 3.1$  Hz, 1H), 6.42 (d,  $^3J_{\text{HH}} = 8.8$  Hz, 2H), 6.18 (d,  $^3J_{\text{HH}} = 8.8$  Hz, 2H), 3.85 (s, 3H), 3.71 (s, 3H), 1.94-1.84 (m, 2H), 1.75-1.50 (m, 10H), 1.38-1.19 (m, 4H), 1.18-0.96 (m, 4H), 0.87-0.75 (m, 2H).  $^{13}\text{C}\{^1\text{H}\}$  NMR ( $\text{CDCl}_3$ ):  $\delta$  165.1, 161.9, 157.1, 146.0, 138.0, 131.6, 129.44, 129.36, 129.2, 128.5, 128.0, 126.2, 123.2, 120.4, 118.7 (q,  $^1J_{\text{CF}} = 321$  Hz), 117.3, 114.5 (q,  $^5J_{\text{CF}} = 2.9$  Hz), 113.0, 110.5, 102.0, 55.2, 32.9, 28.1, 27.8, 27.42, 27.39, 26.6, 23.0. HRMS (FAB) calcd for  $\text{C}_{36}\text{H}_{41}\text{F}_3\text{N}_2\text{O}_5\text{SSi}$  ( $\text{M}^+$ ) 698.2452, found 698.2438.

**2-(Dicyclohexyl(2-thienyl)silyl)-3-(4-methoxybenzamido)phenyl trifluoromethanesulfonate (1p)**

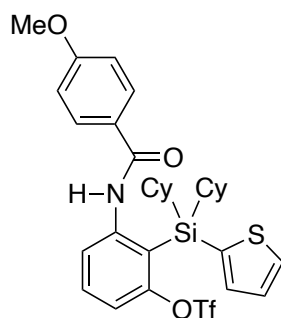

$^1\text{H}$  NMR ( $\text{CDCl}_3$ ):  $\delta$  8.27 (s, 1H), 7.96 (d,  $^3J_{\text{HH}} = 8.2$  Hz, 1H), 7.78 (d,  $^3J_{\text{HH}} = 5.0$  Hz, 1H), 7.53 (t,  $^3J_{\text{HH}} = 8.2$  Hz, 1H), 7.40 (d,  $^3J_{\text{HH}} = 3.6$  Hz, 1H), 7.33 (dd,  $^3J_{\text{HH}} = 5.0$  and  $3.6$  Hz, 1H), 7.23 (d,  $^3J_{\text{HH}} = 8.2$  Hz, 1H), 6.89 (d,  $^3J_{\text{HH}} = 9.2$  Hz, 2H), 6.71 (d,  $^3J_{\text{HH}} = 9.2$  Hz, 2H), 3.84 (s, 3H), 1.87-1.77 (m, 2H), 1.75-1.49 (m, 10H), 1.35-0.99 (m, 8H), 0.90-0.74 (m, 2H).  $^{13}\text{C}\{^1\text{H}\}$  NMR ( $\text{CDCl}_3$ ):  $\delta$  165.2, 162.4, 156.3, 145.9, 137.6, 133.1, 132.0, 131.5, 129.5, 128.7, 126.4, 124.1, 118.7 (q,  $^1J_{\text{CF}} = 320$  Hz), 117.0, 114.9 (q,  $^5J_{\text{CF}} = 2.2$  Hz), 113.6, 55.5, 27.9, 27.70, 27.67, 27.3, 26.6, 23.9. HRMS (FAB) calcd for  $\text{C}_{31}\text{H}_{37}\text{F}_3\text{NO}_5\text{S}_2\text{Si}$  ( $\text{M}+\text{H}^+$ ) 652.1829, found 652.1839.

**2-(1-Cyclohexenyldicyclohexylsilyl)-3-(4-methoxybenzamido)phenyl trifluoromethanesulfonate (1q)**

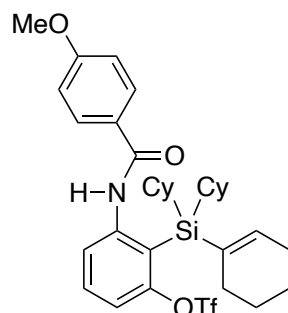

$^1\text{H}$  NMR ( $\text{CDCl}_3$ ):  $\delta$  8.84 (s, 1H), 8.09 (d,  $^3J_{\text{HH}} = 8.2$  Hz, 1H), 7.73 (d,  $^3J_{\text{HH}} = 8.7$  Hz, 2H), 7.48 (t,  $^3J_{\text{HH}} = 8.2$  Hz, 1H), 7.16 (d,  $^3J_{\text{HH}} = 8.3$  Hz, 1H), 6.96 (d,  $^3J_{\text{HH}} = 8.7$  Hz, 2H), 6.26 (s, 1H), 3.88 (s, 3H), 2.12-1.96 (m, 4H), 1.79-1.56 (m, 10H), 1.56-1.36 (m, 6H), 1.33-1.00 (m, 10H).  $^{13}\text{C}\{^1\text{H}\}$  NMR ( $\text{CDCl}_3$ ):  $\delta$  165.8, 162.7, 156.6, 145.9, 142.8, 134.4, 131.5, 129.3, 127.4, 122.9, 118.7 (q,  $^1J_{\text{CF}} = 320$  Hz), 117.4, 114.8 (q,  $^5J_{\text{CF}} = 2.9$  Hz), 114.0, 55.6, 28.7, 28.24, 28.23, 28.0, 27.2, 26.9, 23.6, 22.3, 22.0. HRMS (FAB) calcd for  $\text{C}_{33}\text{H}_{43}\text{F}_3\text{NO}_5\text{SSi}$  ( $\text{M}+\text{H}^+$ ) 650.2578, found 650.2581.

**2-(Dicyclohexyl(phenylethynyl)silyl)-3-(4-methoxybenzamido)phenyl trifluoromethanesulfonate (1r)**

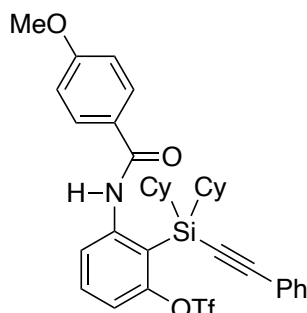

$^1\text{H}$  NMR ( $\text{CDCl}_3$ ):  $\delta$  9.93 (s, 1H), 8.21 (d,  $^3J_{\text{HH}} = 8.3$  Hz, 1H), 7.76 (d,  $^3J_{\text{HH}} = 8.8$  Hz, 2H), 7.50 (t,  $^3J_{\text{HH}} = 8.4$  Hz, 1H), 7.37 (tt,  $^3J_{\text{HH}} = 7.4$  Hz and  $^4J_{\text{HH}} = 1.9$  Hz, 1H), 7.30-7.24 (m, 2H), 7.23-7.19 (m, 2H), 7.17 (d,  $^3J_{\text{HH}} = 8.3$  Hz, 1H), 6.55 (d,  $^3J_{\text{HH}} = 8.7$  Hz, 2H), 3.67 (s, 3H), 1.91-1.81 (m, 2H), 1.77-1.56 (m, 8H), 1.46-1.14 (m, 12H).  $^{13}\text{C}\{^1\text{H}\}$  NMR ( $\text{CDCl}_3$ ):  $\delta$  166.4, 162.4, 155.6, 146.3, 132.4, 131.9, 129.5, 128.4, 127.2, 122.7, 121.9, 118.6 (q,  $^1J_{\text{CF}} = 320$  Hz), 115.5, 114.1 (q,  $^5J_{\text{CF}} = 1.9$  Hz), 113.8, 113.4, 88.5, 55.3, 28.3, 28.1, 27.9, 27.8, 26.7, 24.7. HRMS (FAB) calcd for  $\text{C}_{35}\text{H}_{39}\text{F}_3\text{NO}_5\text{SSi}$  ( $\text{M}+\text{H}^+$ ) 670.2265, found 670.2278.

### 2-(Dicyclohexyl(methyl)silyl)-3-(4-methoxybenzamido)phenyl trifluoromethanesulfonate (1s)

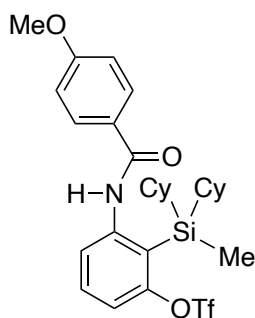

$^1\text{H}$  NMR ( $\text{CDCl}_3$ ):  $\delta$  7.87-7.84 (m, 2H), 7.82 (d,  $^3J_{\text{HH}} = 8.7$  Hz, 2H), 7.47 (t,  $^3J_{\text{HH}} = 8.3$  Hz, 1H), 7.20 (d,  $^3J_{\text{HH}} = 8.3$  Hz, 1H), 7.02 (d,  $^3J_{\text{HH}} = 8.8$  Hz, 2H), 3.90 (s, 3H), 1.80-1.61 (m, 8H), 1.51-1.43 (m, 2H), 1.24-1.01 (m, 12H), 0.39 (s, 3H).  $^{13}\text{C}\{^1\text{H}\}$  NMR ( $\text{CDCl}_3$ ):  $\delta$  165.4, 162.9, 155.9, 144.7, 131.3, 129.1, 126.7, 124.9, 122.4, 118.6 (q,  $^1J_{\text{CF}} = 320$  Hz), 116.5 (q,  $^5J_{\text{CF}} = 1.9$  Hz), 114.3, 55.6, 28.6, 28.3, 28.2, 28.1, 26.8, 25.4, -6.5. HRMS (FAB) calcd for  $\text{C}_{28}\text{H}_{37}\text{F}_3\text{NO}_5\text{SSi}$  ( $\text{M}+\text{H}^+$ ) 584.2108, found 584.2116.

### 2-(Dicyclohexyl(ethyl)silyl)-3-(4-methoxybenzamido)phenyl trifluoromethanesulfonate (1t)

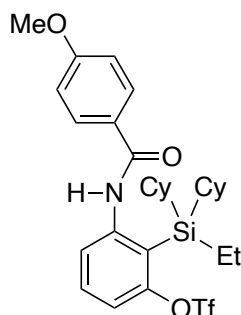

$^1\text{H}$  NMR ( $\text{CDCl}_3$ ):  $\delta$  7.97 (s, 1H), 7.92 (d,  $^3J_{\text{HH}} = 7.8$  Hz, 1H), 7.82 (d,  $^3J_{\text{HH}} = 8.7$  Hz, 2H), 7.49 (t,  $^3J_{\text{HH}} = 8.2$  Hz, 1H), 7.19 (d,  $^3J_{\text{HH}} = 8.2$  Hz, 1H), 7.01 (d,  $^3J_{\text{HH}} = 9.2$  Hz, 2H), 3.90 (s, 3H), 1.84-1.54 (m, 10H), 1.31-0.95 (m, 17H).  $^{13}\text{C}\{^1\text{H}\}$  NMR ( $\text{CDCl}_3$ ):  $\delta$  165.3, 162.9, 156.0, 145.0, 131.5, 129.0, 126.9, 124.4, 120.7, 118.6 (q,  $^1J_{\text{CF}} = 320$  Hz), 116.4 (q,  $^5J_{\text{CF}} = 1.9$  Hz), 114.3, 55.6, 28.9, 28.8, 28.3, 26.9, 26.0, 8.4, 3.0. HRMS (FAB) calcd for  $\text{C}_{29}\text{H}_{39}\text{F}_3\text{NO}_5\text{SSi}$  ( $\text{M}+\text{H}^+$ ) 598.2265, found 598.2266.

### 2-(Diisopropyl(phenyl)silyl)-3-(4-methoxybenzamido)phenyl trifluoromethanesulfonate (1u)

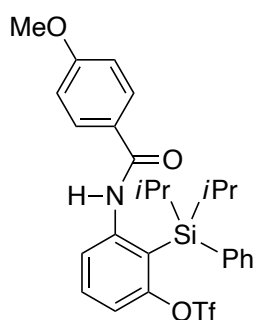

$^1\text{H}$  NMR ( $\text{CDCl}_3$ ):  $\delta$  8.01 (s, 1H), 7.97 (dd,  $^3J_{\text{HH}} = 8.2$  Hz and  $^4J_{\text{HH}} = 0.9$  Hz, 1H), 7.59-7.45 (m,



6H), 7.28 (d,  $^3J_{\text{HH}} = 8.2$  Hz, 1H), 6.71 (d,  $^3J_{\text{HH}} = 9.2$  Hz, 2H), 6.64 (d,  $^3J_{\text{HH}} = 8.7$  Hz, 2H), 3.82 (s, 3H), 1.81 (sept,  $^3J_{\text{HH}} = 7.3$  Hz, 2H), 1.03 (d,  $^3J_{\text{HH}} = 7.4$  Hz, 6H), 0.82 (d,  $^3J_{\text{HH}} = 7.3$  Hz, 6H).  $^{13}\text{C}\{^1\text{H}\}$  NMR ( $\text{CDCl}_3$ ):  $\delta$  164.9, 162.4, 157.1, 145.6, 135.6, 132.3, 132.0, 130.5, 129.3, 128.7, 126.1, 124.2, 118.7 (q,  $^1J_{\text{CF}} = 320$  Hz), 116.7, 114.9 (q,  $^5J_{\text{CF}} = 2.6$  Hz), 113.6, 55.5, 17.7, 17.6, 11.2. HRMS (FAB) calcd for  $\text{C}_{27}\text{H}_{31}\text{F}_3\text{NO}_5\text{SSi}$  ( $\text{M}+\text{H}^+$ ) 566.1639, found 566.1627.

**2-(1-(*tert*-Butyl)siletan-1-yl)-3-(4-methoxybenzamido)phenyl trifluoromethanesulfonate (1v)**

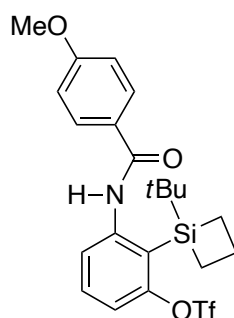

$^1\text{H}$  NMR ( $\text{CDCl}_3$ ):  $\delta$  8.16 (d,  $^3J_{\text{HH}} = 8.2$  Hz, 1H), 7.97 (s, 1H), 7.76 (d,  $^3J_{\text{HH}} = 8.7$  Hz, 2H), 7.52 (t,  $^3J_{\text{HH}} = 8.2$  Hz, 1H), 7.20 (d,  $^3J_{\text{HH}} = 8.7$  Hz, 1H), 6.98 (d,  $^3J_{\text{HH}} = 8.7$  Hz, 2H), 3.88 (s, 3H), 2.50-2.35 (m, 1H), 2.21-2.04 (m, 1H), 1.62-1.40 (m, 4H), 1.03 (s, 9H).  $^{13}\text{C}\{^1\text{H}\}$  NMR ( $\text{CDCl}_3$ ):  $\delta$  165.1, 162.9, 155.0, 144.7, 132.4, 128.9, 126.5, 122.3, 120.1, 118.5 (q,  $^1J_{\text{CF}} = 320$  Hz), 114.8 (q,  $^5J_{\text{CF}} = 1.9$  Hz), 114.3, 55.6, 26.3, 20.0, 19.3, 13.7, 13.2. HRMS (FAB) calcd for  $\text{C}_{22}\text{H}_{27}\text{F}_3\text{NO}_5\text{SSi}$  ( $\text{M}+\text{H}^+$ ) 502.1326, found 502.1330.

**2-(Dicyclohexyl(phenyl)silyl)-3-(4-(dimethylamino)benzamido)phenyl trifluoromethanesulfonate (1w)**

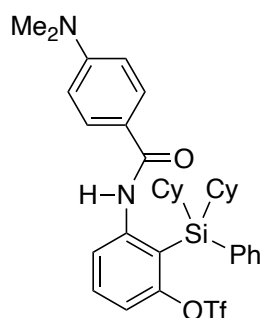

$^1\text{H}$  NMR ( $\text{CDCl}_3$ ):  $\delta$  7.97 (d,  $^3J_{\text{HH}} = 8.2$  Hz, 1H), 7.86 (s, 1H), 7.60-7.45 (m, 6H), 7.22 (d,  $^3J_{\text{HH}} = 8.2$  Hz, 1H), 6.62 (d,  $^3J_{\text{HH}} = 9.2$  Hz, 2H), 6.36 (d,  $^3J_{\text{HH}} = 9.2$  Hz, 2H), 2.99 (s, 6H), 1.90-1.79 (m, 2H), 1.74-1.50 (m, 10H), 1.37-1.14 (m, 4H), 1.12-0.95 (m, 4H), 0.88-0.73 (m, 2H).  $^{13}\text{C}\{^1\text{H}\}$  NMR ( $\text{CDCl}_3$ ):  $\delta$  165.4, 157.0, 152.5, 146.0, 135.6, 132.9, 131.7, 130.3, 129.2, 128.3, 124.1, 120.5, 118.7 (q,  $^1J_{\text{CF}} = 321$  Hz), 116.9, 114.6 (q,  $^5J_{\text{CF}} = 2.9$  Hz), 110.7, 40.1, 28.1, 27.8, 27.33, 27.27, 26.6, 22.6. HRMS (FAB) calcd for  $\text{C}_{34}\text{H}_{42}\text{F}_3\text{N}_2\text{O}_4\text{SSi}$  ( $\text{M}+\text{H}^+$ ) 659.2581, found 659.2589.

**Methyl 4-((2-(dicyclohexyl(phenyl)silyl)-3-(trifluoromethylsulfonyloxy)phenyl)carbamoyl)benzoate (1x)**

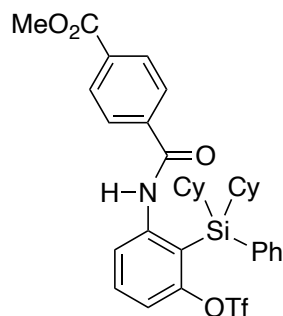

$^1\text{H}$  NMR ( $\text{CDCl}_3$ ):  $\delta$  8.09 (s, 1H), 7.99 (d,  $^3J_{\text{HH}} = 8.2$  Hz, 1H), 7.82 (d,  $^3J_{\text{HH}} = 8.7$  Hz, 2H), 7.61-7.53 (m, 2H), 7.51-7.44 (m, 4H), 7.29 (d,  $^3J_{\text{HH}} = 8.2$  Hz, 1H), 6.82 (d,  $^3J_{\text{HH}} = 8.7$  Hz, 2H), 3.94 (s, 3H), 1.90-1.78 (m, 2H), 1.74-1.48 (m, 10H), 1.37-1.13 (m, 4H), 1.10-0.96 (m, 4H), 0.85-0.70 (m, 2H).  $^{13}\text{C}\{^1\text{H}\}$  NMR ( $\text{CDCl}_3$ ):  $\delta$  166.3, 164.5, 156.9, 144.9, 137.8, 135.5, 132.9, 132.6, 132.0, 130.6, 129.7, 129.3, 126.6, 124.0, 118.7 (q,  $^1J_{\text{CF}} = 320$  Hz), 117.5, 115.6 (q,  $^5J_{\text{CF}} = 1.9$  Hz), 52.5, 27.9, 27.7, 27.4, 27.2, 26.5, 22.6. HRMS (FAB) calcd for  $\text{C}_{34}\text{H}_{39}\text{F}_3\text{NO}_6\text{SSi}$  ( $\text{M}+\text{H}^+$ ) 674.2214, found 674.2220.

**2-(Dicyclohexyl(phenyl)silyl)-3-(2-methylbenzamido)phenyl trifluoromethanesulfonate (1y)**

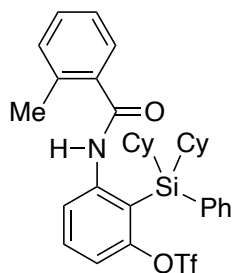

$^1\text{H}$  NMR ( $\text{CDCl}_3$ ):  $\delta$  8.11 (d,  $^3J_{\text{HH}} = 8.3$  Hz, 1H), 7.71 (s, 1H), 7.55 (t,  $^3J_{\text{HH}} = 8.3$  Hz, 1H), 7.40-7.33 (m, 3H), 7.30-7.23 (m, 3H), 7.19 (t,  $^3J_{\text{HH}} = 7.5$  Hz, 1H), 7.08 (d,  $^3J_{\text{HH}} = 7.6$  Hz, 1H), 6.84 (t,  $^3J_{\text{HH}} = 7.5$  Hz, 1H), 6.26 (d,  $^3J_{\text{HH}} = 7.5$  Hz, 1H), 2.27 (s, 3H), 1.88-1.78 (m, 2H), 1.75-1.48 (m, 10H), 1.36-1.17 (m, 4H), 1.14-0.98 (m, 4H), 0.86-0.73 (m, 2H).  $^{13}\text{C}\{^1\text{H}\}$  NMR ( $\text{CDCl}_3$ ):  $\delta$  167.6, 156.9, 145.5, 136.9, 135.0, 134.9, 132.04, 131.98, 131.1, 130.3, 130.0, 128.8, 125.8, 125.7, 122.6, 118.7 (q,  $^1J_{\text{CF}} = 321$  Hz), 116.7, 114.9 (q,  $^5J_{\text{CF}} = 2.9$  Hz), 27.9, 27.7, 27.5, 27.3, 26.6, 22.7, 19.9. HRMS (FAB) calcd for  $\text{C}_{33}\text{H}_{39}\text{F}_3\text{NO}_4\text{SSi}$  ( $\text{M}+\text{H}^+$ ) 630.2316, found 630.2325.

**2-(Dicyclohexyl(phenyl)silyl)-3-(3-furancarboxamido)phenyl trifluoromethanesulfonate (1z)**

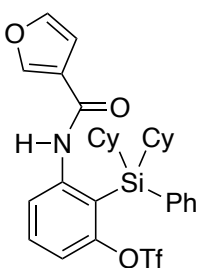

$^1\text{H}$  NMR ( $\text{CDCl}_3$ ):  $\delta$  7.99 (d,  $^3J_{\text{HH}} = 8.2$  Hz, 1H), 7.72 (s, 1H), 7.60-7.47 (m, 6H), 7.26 (d,  $^3J_{\text{HH}} = 8.7$  Hz, 1H), 7.20 (t,  $J_{\text{HH}} = 1.6$  Hz, 1H), 6.77 (d,  $J_{\text{HH}} = 0.9$  Hz, 1H), 5.67 (s, 1H), 1.88-1.78 (m, 2H), 1.74-1.50 (m, 10H), 1.37-1.18 (m, 4H), 1.10-0.95 (m, 4H), 0.87-0.73 (m, 2H).  $^{13}\text{C}\{^1\text{H}\}$  NMR ( $\text{CDCl}_3$ ):  $\delta$  160.6, 157.0, 144.9, 144.6, 143.6, 135.6, 132.9, 132.0, 130.7, 129.2, 123.8, 122.5, 118.7 (q,  $^1J_{\text{CF}} = 320$  Hz), 116.8, 115.3 (q,  $^5J_{\text{CF}} = 2.6$  Hz), 108.0, 28.0, 27.7, 27.4, 27.2, 26.6, 22.6. HRMS (FAB) calcd for  $\text{C}_{30}\text{H}_{35}\text{F}_3\text{NO}_5\text{SSi}$  ( $\text{M}+\text{H}^+$ ) 606.1952, found 606.1949.

### 2-(Dicyclohexyl(phenyl)silyl)-3-pivalamidophenyl trifluoromethanesulfonate (1aa)

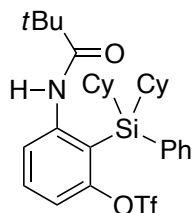

$^1\text{H}$  NMR ( $\text{CDCl}_3$ ):  $\delta$  7.80 (d,  $^3J_{\text{HH}} = 8.2$  Hz, 1H), 7.54-7.39 (m, 6H), 7.33 (s, 1H), 7.22 (d,  $^3J_{\text{HH}} = 8.2$  Hz, 1H), 1.87-1.56 (m, 12H), 1.38-1.20 (m, 4H), 1.12-0.95 (m, 4H), 0.91-0.75 (m, 2H), 0.69 (s, 9H).  $^{13}\text{C}\{^1\text{H}\}$  NMR ( $\text{CDCl}_3$ ):  $\delta$  177.1, 157.0, 145.8, 135.4, 133.3, 131.5, 130.4, 128.9, 124.9, 118.7 (q,  $^1J_{\text{CF}} = 320$  Hz), 117.6, 115.1 (q,  $^5J_{\text{CF}} = 2.6$  Hz), 39.3, 28.0, 27.7, 27.4, 26.64, 26.60, 22.9. HRMS (FAB) calcd for  $\text{C}_{30}\text{H}_{41}\text{F}_3\text{NO}_4\text{SSi}$  ( $\text{M}+\text{H}^+$ ) 596.2472, found 596.2473.

### 2-(Dicyclohexyl(phenyl)silyl)-3-isobutyramidophenyl trifluoromethanesulfonate (1bb)

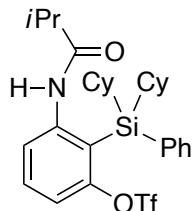

$^1\text{H}$  NMR ( $\text{CDCl}_3$ ):  $\delta$  8.10 (d,  $^3J_{\text{HH}} = 8.2$  Hz, 1H), 7.58-7.52 (m, 2H), 7.52-7.43 (m, 4H), 7.29 (s, 1H), 7.19 (d,  $^3J_{\text{HH}} = 8.2$  Hz, 1H), 1.90-1.79 (m, 2H), 1.78-1.60 (m, 10H), 1.39-1.24 (m, 4H), 1.17-0.98 (m, 5H), 0.90-0.77 (m, 2H), 0.76 (d,  $^3J_{\text{HH}} = 6.9$  Hz, 6H).  $^{13}\text{C}\{^1\text{H}\}$  NMR ( $\text{CDCl}_3$ ):  $\delta$  175.0, 156.9, 145.8, 135.4, 132.9, 132.0, 130.5, 128.9, 122.0, 118.7 (q,  $^1J_{\text{CF}} = 321$  Hz), 115.4, 114.4 (q,  $^5J_{\text{CF}} = 2.6$  Hz), 36.4, 28.0, 27.73, 27.70, 27.3, 26.6, 22.8, 19.0. HRMS (FAB) calcd for  $\text{C}_{29}\text{H}_{39}\text{F}_3\text{NO}_4\text{SSi}$  ( $\text{M}+\text{H}^+$ ) 582.2316, found 582.2329.

### 3-Acetamido-2-(dicyclohexyl(phenyl)silyl)phenyl trifluoromethanesulfonate (1cc)

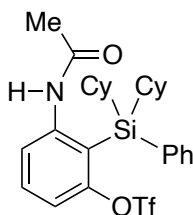

$^1\text{H}$  NMR ( $\text{CDCl}_3$ ):  $\delta$  8.02 (d,  $^3J_{\text{HH}} = 8.3$  Hz, 1H), 7.58-7.44 (m, 6H), 7.23 (s, 1H), 7.21 (d,  $^3J_{\text{HH}} = 8.7$  Hz, 1H), 1.90-1.80 (m, 2H), 1.78-1.61 (m, 10H), 1.39-1.26 (m, 4H), 1.22 (s, 3H), 1.18-0.98 (m, 4H), 0.90-0.76 (m, 2H).  $^{13}\text{C}\{^1\text{H}\}$  NMR ( $\text{CDCl}_3$ ):  $\delta$  167.9, 156.8, 145.4, 135.3, 132.9, 132.1, 130.4, 129.0, 122.1, 118.7 (q,  $^1J_{\text{CF}} = 321$  Hz), 115.4, 114.6 (q,  $^5J_{\text{CF}} = 1.9$  Hz), 28.0, 27.8, 27.7, 27.3, 26.6, 23.6, 22.8. HRMS (FAB) calcd for  $\text{C}_{27}\text{H}_{35}\text{F}_3\text{NO}_4\text{SSi}$  ( $\text{M}+\text{H}^+$ ) 554.2003, found 554.2015.

**2-(*tert*-Butyldi-4-tolylsilyl)-3-(4-methoxybenzamido)phenyl trifluoromethanesulfonate (1hh)**

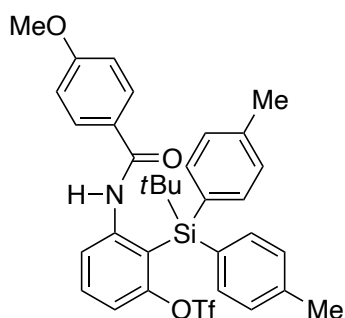

$^1\text{H}$  NMR ( $\text{CDCl}_3$ ):  $\delta$  8.10 (s, 1H), 8.04 (d,  $^3J_{\text{HH}} = 8.2$  Hz, 1H), 7.54 (d,  $^3J_{\text{HH}} = 7.8$  Hz, 4H), 7.53 (t,  $^3J_{\text{HH}} = 8.2$  Hz, 1H), 7.23 (d,  $^3J_{\text{HH}} = 8.7$  Hz, 1H), 7.15 (d,  $^3J_{\text{HH}} = 7.8$  Hz, 4H), 6.84 (d,  $^3J_{\text{HH}} = 9.2$  Hz, 2H), 6.66 (d,  $^3J_{\text{HH}} = 9.2$  Hz, 2H), 3.83 (s, 3H), 2.34 (s, 6H), 1.21 (s, 9H).  $^{13}\text{C}\{^1\text{H}\}$  NMR ( $\text{CDCl}_3$ ):  $\delta$  165.1, 162.4, 156.7, 145.5, 140.0, 135.8, 131.9, 131.0, 129.6, 128.9, 126.4, 123.7, 118.9, 118.5 (q,  $^1J_{\text{CF}} = 321$  Hz), 115.5 (q,  $^5J_{\text{CF}} = 1.9$  Hz), 113.5, 55.5, 29.4, 21.6, 20.4. HRMS (FAB) calcd for  $\text{C}_{33}\text{H}_{35}\text{F}_3\text{NO}_5\text{SSi}$  ( $\text{M}+\text{H}^+$ ) 642.1952, found 642.1952.

**2-(*tert*-Butylbis(4-fluorophenyl)silyl)-3-(4-methoxybenzamido)phenyl trifluoromethanesulfonate (1ii)**

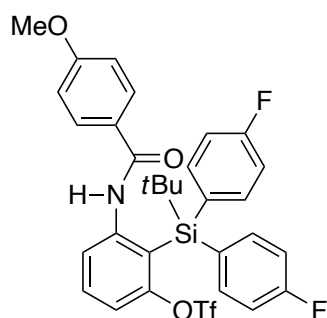

$^1\text{H}$  NMR ( $\text{CDCl}_3$ ):  $\delta$  8.01 (d,  $^3J_{\text{HH}} = 8.2$  Hz, 1H), 7.81 (s, 1H), 7.58 (dd,  $^3J_{\text{HH}} = 8.2$  Hz and  $^4J_{\text{HF}} = 6.0$  Hz, 4H), 7.55 (t,  $^3J_{\text{HH}} = 8.2$  Hz, 1H), 7.22 (d,  $^3J_{\text{HH}} = 8.2$  Hz, 1H), 7.02 (t,  $^3J = 8.7$  Hz, 4H), 6.91 (d,  $^3J_{\text{HH}} = 8.7$  Hz, 2H), 6.70 (d,  $^3J_{\text{HH}} = 8.7$  Hz, 2H), 3.82 (s, 3H), 1.18 (s, 9H).  $^{13}\text{C}\{^1\text{H}\}$  NMR ( $\text{CDCl}_3$ ):  $\delta$  165.0, 164.2 (d,  $^1J_{\text{CF}} = 252$  Hz), 162.6, 156.4, 145.4, 137.8 (d,  $^3J_{\text{CF}} = 7.7$  Hz), 132.3, 129.9 (d,  $^4J_{\text{CF}} = 3.8$  Hz), 128.6, 126.2, 124.0, 118.4 (q,  $^1J_{\text{CF}} = 322$  Hz), 117.9, 116.1 (d,  $^2J_{\text{CF}} = 20.1$  Hz), 115.7 (q,  $^5J_{\text{CF}} = 2.9$  Hz), 113.7, 55.4, 29.3, 20.2. HRMS (FAB) calcd for  $\text{C}_{31}\text{H}_{29}\text{F}_5\text{NO}_5\text{SSi}$  ( $\text{M}+\text{H}^+$ ) 650.1450, found 650.1469.

**2-(*tert*-Butyldiphenylsilyl)-3-(4-methylbenzamido)phenyl trifluoromethanesulfonate (1jj)**

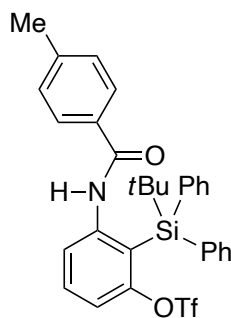

$^1\text{H}$  NMR ( $\text{CDCl}_3$ ):  $\delta$  8.07 (s, 1H), 8.05 (dd,  $^3J_{\text{HH}} = 8.2$  Hz and  $^4J_{\text{HH}} = 0.9$  Hz, 1H), 7.70-7.63 (m, 4H), 7.56 (t,  $^3J_{\text{HH}} = 8.2$  Hz, 1H), 7.44-7.38 (m, 2H), 7.28-7.32 (m, 4H), 7.26 (d,  $^3J_{\text{HH}} = 8.3$  Hz, 1H), 6.97 (d,  $^3J_{\text{HH}} = 7.8$  Hz, 2H), 6.74 (d,  $^3J_{\text{HH}} = 8.2$  Hz, 2H), 2.35 (s, 3H), 1.22 (s, 9H).  $^{13}\text{C}\{^1\text{H}\}$  NMR ( $\text{CDCl}_3$ ):  $\delta$  165.3, 156.7, 145.3, 142.3, 135.8, 134.5, 132.1, 131.0, 130.0, 129.1, 128.8, 126.9, 124.0, 118.8, 118.5 (q,  $^1J_{\text{CF}} = 321$  Hz), 115.6, 29.4, 21.5, 20.4. HRMS (FAB) calcd for  $\text{C}_{31}\text{H}_{31}\text{F}_3\text{NO}_4\text{SSi}$  ( $\text{M}+\text{H}^+$ ) 598.1690, found 598.1699.

**Methyl 4-((2-(*tert*-butyldiphenylsilyl)-3-(trifluoromethylsulfonyloxy)phenyl)carbamoyl)benzoate (1kk)**

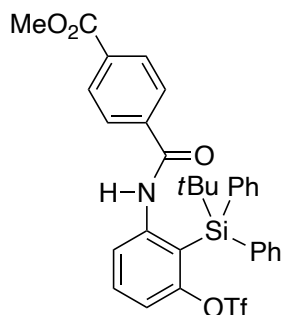

$^1\text{H}$  NMR ( $\text{CDCl}_3$ ):  $\delta$  8.13 (s, 1H), 8.04 (d,  $^3J_{\text{HH}} = 8.2$  Hz, 1H), 7.84 (d,  $^3J_{\text{HH}} = 8.7$  Hz, 2H), 7.68-7.62 (m, 4H), 7.59 (t,  $^3J_{\text{HH}} = 8.2$  Hz, 1H), 7.44-7.38 (m, 2H), 7.37-7.28 (m, 5H), 6.92 (d,  $^3J_{\text{HH}} = 8.7$  Hz, 2H), 3.95 (s, 3H), 1.22 (s, 9H).  $^{13}\text{C}\{^1\text{H}\}$  NMR ( $\text{CDCl}_3$ ):  $\delta$  166.2, 164.4, 156.6, 144.8, 137.7, 135.6, 134.3, 132.9, 132.2, 130.1, 129.6, 128.8, 126.8, 123.9, 119.0, 118.4 (q,  $^1J_{\text{CF}} = 321$  Hz), 115.9 (q,  $^5J_{\text{CF}} = 1.9$  Hz), 52.4, 29.2, 20.3. HRMS (FAB) calcd for  $\text{C}_{32}\text{H}_{31}\text{F}_3\text{NO}_6\text{SSi}$  ( $\text{M}+\text{H}^+$ ) 642.1588, found 642.1590.

**2-(*tert*-Butyldiphenylsilyl)-3-(2-methylbenzamido)phenyl trifluoromethanesulfonate (1ll)**

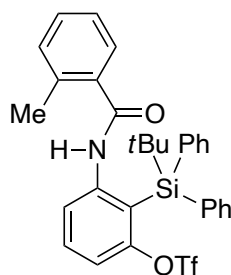

$^1\text{H}$  NMR ( $\text{CDCl}_3$ ):  $\delta$  8.15 (d,  $^3J_{\text{HH}} = 8.3$  Hz, 1H), 7.70 (s, 1H), 7.60-7.53 (m, 5H), 7.31-7.17 (m, 8H), 7.09 (d,  $^3J_{\text{HH}} = 7.8$  Hz, 1H), 6.92 (t,  $^3J_{\text{HH}} = 7.6$  Hz, 1H), 6.49 (dd,  $^3J_{\text{HH}} = 7.8$  Hz and  $^4J_{\text{HH}} = 1.4$  Hz, 1H), 2.21 (s, 3H), 1.27 (s, 9H).  $^{13}\text{C}\{^1\text{H}\}$  NMR ( $\text{CDCl}_3$ ):  $\delta$  167.8, 156.6, 145.6, 136.7, 135.4, 135.2, 134.1, 132.3, 131.2, 130.2, 129.9, 128.6, 126.4, 125.8, 122.8, 118.5 (q,  $^1J_{\text{CF}} = 321$  Hz), 117.8, 115.2 (q,  $^5J_{\text{CF}} = 2.9$  Hz), 29.3, 20.3, 19.8. HRMS (FAB) calcd for  $\text{C}_{31}\text{H}_{31}\text{F}_3\text{NO}_4\text{SSi}$  ( $\text{M}+\text{H}^+$ ) 598.1690, found 598.1690.

### III. Catalytic Reactions and Derivatization

#### Procedure for Scheme 1b.

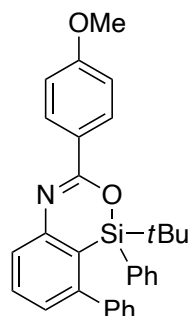

Et<sub>2</sub>NH (46.6  $\mu$ L, 0.450 mmol) and DMA (0.6 mL) were added to a mixture of compound **1b** (92.1 mg, 0.150 mmol) and Pd(PPh<sub>3</sub>)<sub>4</sub> (17.3 mg, 15.0  $\mu$ mol), and the resulting solution was stirred for 47 h at 100 °C. The reaction was quenched with H<sub>2</sub>O and this was extracted with Et<sub>2</sub>O. The organic layer was washed with saturated NaCl<sub>aq</sub>, dried over Na<sub>2</sub>SO<sub>4</sub>, filtered, and concentrated under vacuum. The residue was chromatographed on silica gel with hexane/EtOAc = 10/1 (containing 2 vol% of Et<sub>3</sub>N) to afford compound **3b** as a white amorphous (46.5 mg, 0.100 mmol; 67% yield).

<sup>1</sup>H NMR (CDCl<sub>3</sub>):  $\delta$  8.17 (d, <sup>3</sup>J<sub>HH</sub> = 8.7 Hz, 2H), 7.53-7.45 (m, 4H), 7.44-7.38 (m, 1H), 7.32 (t, <sup>3</sup>J<sub>HH</sub> = 7.3 Hz, 2H), 7.25 (t, <sup>3</sup>J<sub>HH</sub> = 7.3 Hz, 1H), 7.12 (t, <sup>3</sup>J<sub>HH</sub> = 7.6 Hz, 2H), 7.09-7.04 (m, 1H), 7.00 (d, <sup>3</sup>J<sub>HH</sub> = 7.4 Hz, 2H), 6.93 (d, <sup>3</sup>J<sub>HH</sub> = 8.7 Hz, 2H), 3.85 (s, 3H), 0.82 (s, 9H). <sup>13</sup>C {<sup>1</sup>H} NMR (CDCl<sub>3</sub>):  $\delta$  162.1, 154.2, 151.3, 148.7, 143.7, 136.1, 135.2, 131.3, 130.24, 130.20, 130.17, 128.1, 127.97, 127.95, 127.50, 127.47, 127.3, 119.8, 113.6, 55.5, 26.6, 21.1. HRMS (FAB) calcd for C<sub>30</sub>H<sub>30</sub>NO<sub>2</sub>Si (M+H<sup>+</sup>) 464.2040, found 464.2042.

#### General Procedure for Schemes 2 and 3.

Et<sub>2</sub>NH (33.0  $\mu$ L, 0.320 mmol) and DMF (0.6 mL) were added to a mixture of compound **1** (0.150 mmol), Pd(OAc)<sub>2</sub> (1.7 mg, 7.5  $\mu$ mol), and PCy<sub>3</sub>•HBF<sub>4</sub> (6.1 mg, 17  $\mu$ mol), and the resulting solution was stirred for 16 h at 80 °C. The reaction was quenched with H<sub>2</sub>O and this was extracted with Et<sub>2</sub>O. The organic layer was washed with saturated NaCl<sub>aq</sub>, dried over Na<sub>2</sub>SO<sub>4</sub>, filtered, and concentrated under vacuum. The residue was chromatographed on silica gel with hexane/EtOAc (containing 2 vol% of Et<sub>3</sub>N) to afford compound **3**.

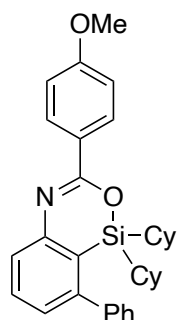

**Scheme 2, compound 3c.** Hexane/EtOAc = 10/1 was used for silica gel chromatography. White amorphous. 94% yield (69.7 mg). The reaction could be scaled up using 4.26 mmol of **1c** to give **3c** in 83% yield (1.75 g, 3.52 mmol).

$^1\text{H}$  NMR ( $\text{CDCl}_3$ ):  $\delta$  8.20 (d,  $^3J_{\text{HH}} = 8.7$  Hz, 2H), 7.50-7.37 (m, 5H), 7.36-7.30 (m, 2H), 7.10 (dd,  $^3J_{\text{HH}} = 7.4$  Hz and  $^4J_{\text{HH}} = 1.4$  Hz, 1H), 6.98 (d,  $^3J_{\text{HH}} = 8.7$  Hz, 2H), 3.88 (s, 3H), 1.74-1.45 (m, 10H), 1.36-1.21 (m, 2H), 1.16-0.97 (m, 6H), 0.91-0.76 (m, 2H), 0.64 (tt,  $^3J_{\text{HH}} = 12.8$  and 2.7 Hz, 2H).  $^{13}\text{C}\{^1\text{H}\}$  NMR ( $\text{CDCl}_3$ ):  $\delta$  162.0, 154.6, 151.0, 147.9, 144.2, 130.9, 130.1, 129.0, 128.4, 127.8, 127.5, 126.81, 126.75, 120.5, 113.6, 55.5, 27.92, 27.88, 27.01, 26.97, 26.6. HRMS (FAB) calcd for  $\text{C}_{32}\text{H}_{38}\text{NO}_2\text{Si}$  ( $\text{M}+\text{H}^+$ ) 496.2666, found 496.2670.

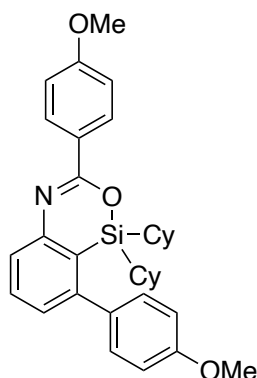

**Scheme 2, compound 3d.** Hexane/EtOAc = 10/1 was used for silica gel chromatography. White amorphous. 95% yield (74.7 mg).

$^1\text{H}$  NMR ( $\text{CDCl}_3$ ):  $\delta$  8.18 (d,  $^3J_{\text{HH}} = 9.0$  Hz, 2H), 7.44 (t,  $^3J_{\text{HH}} = 7.6$  Hz, 1H), 7.36 (dd,  $^3J_{\text{HH}} = 8.0$  Hz and  $^4J_{\text{HH}} = 1.2$  Hz, 1H), 7.24 (d,  $^3J_{\text{HH}} = 8.8$  Hz, 2H), 7.06 (dd,  $^3J_{\text{HH}} = 7.3$  Hz and  $^4J_{\text{HH}} = 1.2$  Hz, 1H), 7.00-6.93 (m, 4H), 3.89 (s, 3H), 3.88 (s, 3H), 1.70-1.44 (m, 10H), 1.35-1.21 (m, 2H), 1.15-0.99 (m, 6H), 0.91-0.79 (m, 2H), 0.65 (tt,  $^3J_{\text{HH}} = 12.8$  and 2.8 Hz, 2H).  $^{13}\text{C}\{^1\text{H}\}$  NMR ( $\text{CDCl}_3$ ):  $\delta$  162.0, 159.5, 154.5, 151.0, 147.6, 136.6, 130.8, 130.1, 127.5, 127.0, 126.6, 120.7, 113.8, 113.6, 55.6, 55.5, 27.91, 27.89, 27.03, 26.99, 26.7. HRMS (FAB) calcd for  $\text{C}_{33}\text{H}_{40}\text{NO}_3\text{Si}$  ( $\text{M}+\text{H}^+$ ) 526.2772, found 526.2784.



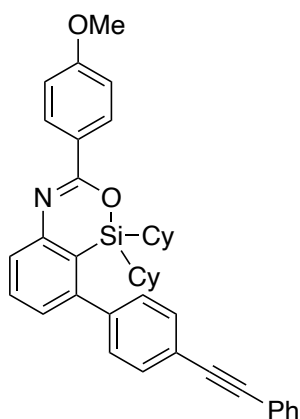

**Scheme 2, compound 3e.** The reaction was conducted for 40 h. Hexane/EtOAc = 9/1 was used for silica gel chromatography. White amorphous. 65% yield (58.0 mg).

$^1\text{H}$  NMR ( $\text{CDCl}_3$ ):  $\delta$  8.19 (d,  $^3J_{\text{HH}} = 8.7$  Hz, 2H), 7.67-7.54 (m, 4H), 7.47 (t,  $^3J_{\text{HH}} = 7.8$  Hz, 1H), 7.44-7.28 (m, 6H), 7.09 (d,  $^3J_{\text{HH}} = 7.3$  Hz, 1H), 6.97 (d,  $^3J_{\text{HH}} = 8.7$  Hz, 2H), 3.88 (s, 3H), 1.76-1.43 (m, 10H), 1.38-1.21 (m, 2H), 1.21-0.99 (m, 6H), 0.96-0.79 (m, 2H), 0.66 (t,  $^3J_{\text{HH}} = 12.6$  Hz, 2H).  $^{13}\text{C}\{^1\text{H}\}$  NMR ( $\text{CDCl}_3$ ):  $\delta$  162.1, 154.7, 151.1, 147.2, 144.1, 131.8, 131.6, 131.0, 130.2, 129.1, 128.6, 127.4, 127.1, 126.7, 123.3, 122.9, 120.4, 113.7, 90.3, 89.3, 55.5, 27.9, 27.1, 27.0, 26.6. HRMS (FAB) calcd for  $\text{C}_{40}\text{H}_{42}\text{NO}_2\text{Si}$  ( $\text{M}+\text{H}^+$ ) 596.2979, found 596.2985.

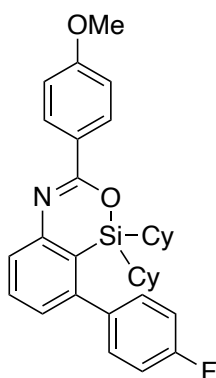

**Scheme 2, compound 3f.** Hexane/EtOAc = 10/1 was used for silica gel chromatography. White amorphous. 92% yield (71.1 mg).

$^1\text{H}$  NMR ( $\text{CDCl}_3$ ):  $\delta$  8.18 (d,  $^3J_{\text{HH}} = 9.0$  Hz, 2H), 7.45 (t,  $^3J_{\text{HH}} = 7.7$  Hz, 1H), 7.39 (dd,  $^3J_{\text{HH}} = 8.0$  Hz and  $^4J_{\text{HH}} = 1.2$  Hz, 1H), 7.29 (dd,  $^3J_{\text{HH}} = 8.8$  Hz and  $^4J_{\text{HF}} = 5.4$  Hz, 2H), 7.13 (t,  $^3J = 8.6$  Hz, 2H), 7.05 (dd,  $^3J_{\text{HH}} = 7.3$  Hz and  $^4J_{\text{HH}} = 1.2$  Hz, 1H), 6.97 (d,  $^3J_{\text{HH}} = 9.0$  Hz, 2H), 3.88 (s, 3H), 1.70-1.43 (m, 10H), 1.34-1.22 (m, 2H), 1.16-0.99 (m, 6H), 0.91-0.80 (m, 2H), 0.62 (tt,  $^3J_{\text{HH}} = 12.7$  and 2.8 Hz, 2H).  $^{13}\text{C}\{^1\text{H}\}$  NMR ( $\text{CDCl}_3$ ):  $\delta$  162.7 (d,  $^1J_{\text{CF}} = 247$  Hz), 162.1, 154.6, 151.1, 146.7, 140.2 (d,  $^4J_{\text{CF}} = 2.9$  Hz), 130.9, 130.6 (d,  $^3J_{\text{CF}} = 8.6$  Hz), 130.1, 127.3, 127.0, 126.9, 120.6, 115.2 (d,  $^2J_{\text{CF}} = 21.1$  Hz), 113.6, 55.5, 27.9, 27.04, 26.97, 26.6. HRMS (FAB) calcd for  $\text{C}_{32}\text{H}_{37}\text{FNO}_2\text{Si}$  ( $\text{M}+\text{H}^+$ ) 514.2572, found 514.2579.

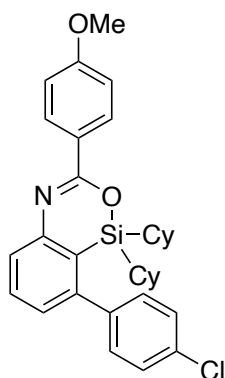

**Scheme 2, compound 3g.** The reaction was conducted using binap (5.5 mol%) as the ligand. Hexane/EtOAc = 10/1 was used for silica gel chromatography. White amorphous. 86% yield (68.3 mg).

$^1\text{H}$  NMR ( $\text{CDCl}_3$ ):  $\delta$  8.17 (d,  $^3J_{\text{HH}} = 8.7$  Hz, 2H), 7.48-7.36 (m, 4H), 7.26 (d,  $^3J_{\text{HH}} = 8.2$  Hz, 2H), 7.04 (dd,  $^3J_{\text{HH}} = 7.4$  Hz and  $^4J_{\text{HH}} = 1.4$  Hz, 1H), 6.96 (d,  $^3J_{\text{HH}} = 8.7$  Hz, 2H), 3.88 (s, 3H), 1.73-1.41 (m, 10H), 1.34-1.20 (m, 2H), 1.18-0.97 (m, 6H), 0.91-0.77 (m, 2H), 0.62 (tt,  $^3J_{\text{HH}} = 12.4$  and 2.7 Hz, 2H).  $^{13}\text{C}\{^1\text{H}\}$  NMR ( $\text{CDCl}_3$ ):  $\delta$  162.1, 154.6, 151.1, 146.5, 142.6, 134.0, 131.0, 130.4, 130.2, 128.5, 127.3, 127.2, 126.7, 120.5, 113.7, 55.5, 27.9, 27.1, 27.04, 26.98, 26.6. HRMS (FAB) calcd for  $\text{C}_{32}\text{H}_{37}\text{ClNO}_2\text{Si}$  ( $\text{M}+\text{H}^+$ ) 530.2277, found 530.2277.

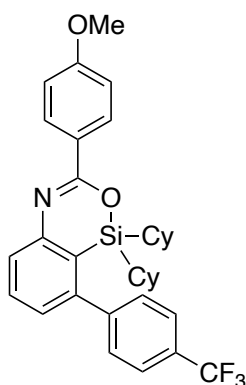

**Scheme 2, compound 3h.** Hexane/EtOAc = 9/1 was used for silica gel chromatography. White amorphous. 92% yield (78.2 mg).

$^1\text{H}$  NMR ( $\text{CDCl}_3$ ):  $\delta$  8.18 (d,  $^3J_{\text{HH}} = 9.2$  Hz, 2H), 7.72 (d,  $^3J_{\text{HH}} = 7.8$  Hz, 2H), 7.52-7.40 (m, 4H), 7.08 (dd,  $^3J_{\text{HH}} = 7.3$  Hz and  $^4J_{\text{HH}} = 0.9$  Hz, 1H), 6.97 (d,  $^3J_{\text{HH}} = 9.2$  Hz, 2H), 3.88 (s, 3H), 1.71-1.41 (m, 10H), 1.33-1.18 (m, 2H), 1.15-0.96 (m, 6H), 0.88-0.73 (m, 2H), 0.59 (tt,  $^3J_{\text{HH}} = 12.6$  and 2.5 Hz, 2H).  $^{13}\text{C}\{^1\text{H}\}$  NMR ( $\text{CDCl}_3$ ):  $\delta$  162.2, 154.7, 151.2, 147.9, 146.3, 131.1, 130.22 (q,  $^2J_{\text{CF}} = 32.6$  Hz), 130.19, 129.4, 127.5, 127.2, 126.5, 125.4 (q,  $^3J_{\text{CF}} = 3.5$  Hz), 124.3 (q,  $^1J_{\text{CF}} = 272$  Hz), 120.5, 113.7, 55.5, 27.9, 27.8, 27.1, 27.0, 26.9, 26.6. HRMS (FAB) calcd for  $\text{C}_{33}\text{H}_{37}\text{F}_3\text{NO}_2\text{Si}$  ( $\text{M}+\text{H}^+$ ) 564.2540, found 564.2550.

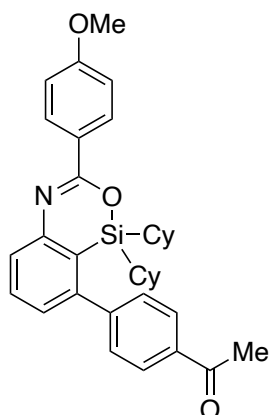

**Scheme 2, compound 3i.** Hexane/EtOAc = 9/1 was used for silica gel chromatography. White amorphous. 86% yield (69.2 mg).

$^1\text{H}$  NMR ( $\text{CDCl}_3$ ):  $\delta$  8.18 (d,  $^3J_{\text{HH}} = 9.2$  Hz, 2H), 8.04 (d,  $^3J_{\text{HH}} = 8.2$  Hz, 2H), 7.52-7.38 (m, 4H), 7.07 (dd,  $^3J_{\text{HH}} = 7.3$  Hz and  $^4J_{\text{HH}} = 0.9$  Hz, 1H), 6.97 (d,  $^3J_{\text{HH}} = 8.7$  Hz, 2H), 3.88 (s, 3H), 2.69 (s, 3H), 1.70-1.40 (m, 10H), 1.35-1.18 (m, 2H), 1.15-0.95 (m, 6H), 0.91-0.77 (m, 2H), 0.60 (tt,  $^3J_{\text{HH}} = 12.8$  and 2.8 Hz, 2H).  $^{13}\text{C}\{^1\text{H}\}$  NMR ( $\text{CDCl}_3$ ):  $\delta$  197.8, 162.1, 154.6, 151.2, 149.1, 146.6, 136.4, 131.0, 130.1, 129.3, 128.4, 127.4, 127.2, 126.5, 120.3, 113.6, 55.5, 27.83, 27.80, 27.1, 27.04, 26.95, 26.9, 26.5. HRMS (FAB) calcd for  $\text{C}_{34}\text{H}_{40}\text{NO}_3\text{Si}$  ( $\text{M}+\text{H}^+$ ) 538.2772, found 538.2775.

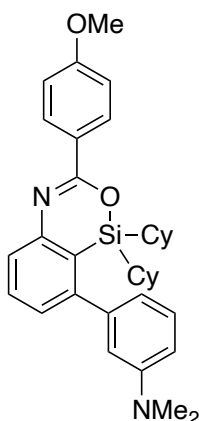

**Scheme 2, compound 3j.** Hexane/EtOAc = 9/1 was used for silica gel chromatography. White amorphous. 99% yield (79.7 mg).

$^1\text{H}$  NMR ( $\text{CDCl}_3$ ):  $\delta$  8.19 (d,  $^3J_{\text{HH}} = 9.2$  Hz, 2H), 7.44 (t,  $^3J_{\text{HH}} = 7.6$  Hz, 1H), 7.37 (dd,  $^3J_{\text{HH}} = 8.2$  Hz and  $^4J_{\text{HH}} = 1.4$  Hz, 1H), 7.27 (t,  $^3J_{\text{HH}} = 8.0$  Hz, 1H), 7.12 (dd,  $^3J_{\text{HH}} = 7.4$  Hz and  $^4J_{\text{HH}} = 0.9$  Hz, 1H), 6.96 (d,  $^3J_{\text{HH}} = 9.2$  Hz, 2H), 6.80-6.74 (m, 1H), 6.68-6.63 (m, 2H), 3.88 (s, 3H), 3.00 (s, 6H), 1.69-1.48 (m, 10H), 1.35-1.21 (m, 2H), 1.14-0.97 (m, 6H), 0.93-0.78 (m, 2H), 0.71 (tt,  $^3J_{\text{HH}} = 12.6$  and 2.5 Hz, 2H).  $^{13}\text{C}\{^1\text{H}\}$  NMR ( $\text{CDCl}_3$ ):  $\delta$  162.0, 154.7, 150.9, 150.6, 148.9, 144.9, 130.7, 130.1, 129.1, 127.6, 126.6, 126.5, 120.5, 117.4, 113.6, 113.2, 112.0, 55.5, 40.8, 28.0, 27.9, 27.03, 26.97, 26.8, 26.7. HRMS (FAB) calcd for  $\text{C}_{34}\text{H}_{43}\text{N}_2\text{O}_2\text{Si}$  ( $\text{M}+\text{H}^+$ ) 539.3088, found 539.3102.

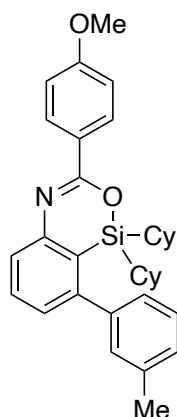

**Scheme 2, compound 3k.** Hexane/EtOAc = 10/1 was used for silica gel chromatography. White amorphous. 98% yield (74.6 mg).

$^1\text{H}$  NMR ( $\text{CDCl}_3$ ):  $\delta$  8.18 (d,  $^3J_{\text{HH}} = 9.0$  Hz, 2H), 7.45 (t,  $^3J_{\text{HH}} = 7.8$  Hz, 1H), 7.38 (dd,  $^3J_{\text{HH}} = 7.8$  Hz and  $^4J_{\text{HH}} = 0.9$  Hz, 1H), 7.32 (t,  $^3J_{\text{HH}} = 7.8$  Hz, 1H), 7.22 (d,  $^3J_{\text{HH}} = 7.6$  Hz, 1H), 7.15-7.11 (m, 2H), 7.09 (dd,  $^3J_{\text{HH}} = 7.3$  Hz and  $^4J_{\text{HH}} = 0.9$  Hz, 1H), 6.96 (d,  $^3J_{\text{HH}} = 9.0$  Hz, 2H), 3.88 (s, 3H), 2.42 (s, 3H), 1.70-1.45 (m, 10H), 1.33-1.20 (m, 2H), 1.15-0.98 (m, 6H), 0.87-0.75 (m, 2H), 0.63 (tt,  $^3J_{\text{HH}} = 12.8$  and 2.8 Hz, 2H).  $^{13}\text{C}\{^1\text{H}\}$  NMR ( $\text{CDCl}_3$ ):  $\delta$  162.0, 154.6, 151.0, 148.1, 144.0, 137.9, 130.8, 130.1, 129.9, 128.39, 128.37, 127.5, 126.7, 126.6, 126.1, 120.5, 113.6, 55.5, 27.99, 27.97, 27.1, 27.0, 26.9, 26.7, 21.6. HRMS (FAB) calcd for  $\text{C}_{33}\text{H}_{40}\text{NO}_2\text{Si}$  ( $\text{M}+\text{H}^+$ ) 510.2823, found 510.2831.

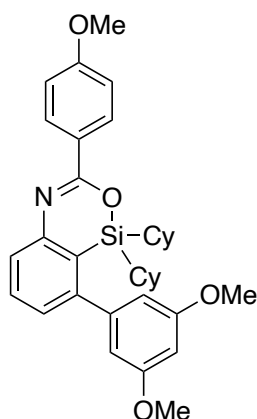

**Scheme 2, compound 3l.** Hexane/EtOAc = 9/1 was used for silica gel chromatography. White amorphous. 93% yield (77.7 mg).

$^1\text{H}$  NMR ( $\text{CDCl}_3$ ):  $\delta$  8.19 (d,  $^3J_{\text{HH}} = 8.7$  Hz, 2H), 7.45 (t,  $^3J_{\text{HH}} = 7.6$  Hz, 1H), 7.39 (dd,  $^3J_{\text{HH}} = 7.4$  Hz and  $^4J_{\text{HH}} = 0.9$  Hz, 1H), 7.10 (dd,  $^3J_{\text{HH}} = 7.3$  Hz and  $^4J_{\text{HH}} = 0.9$  Hz, 1H), 6.97 (d,  $^3J_{\text{HH}} = 8.7$  Hz, 2H), 6.52 (t,  $^4J_{\text{HH}} = 2.3$  Hz, 1H), 6.48 (d,  $^4J_{\text{HH}} = 2.3$  Hz, 2H), 3.88 (s, 3H), 3.84 (s, 6H), 1.74-1.48 (m, 10H), 1.38-1.24 (m, 2H), 1.18-0.98 (m, 6H), 0.95-0.81 (m, 2H), 0.74 (tt,  $^3J_{\text{HH}} = 12.6$  and 2.5 Hz, 2H).  $^{13}\text{C}\{^1\text{H}\}$  NMR ( $\text{CDCl}_3$ ):  $\delta$  162.0, 160.8, 154.7, 151.0, 147.9, 146.0, 130.8, 130.1, 127.4, 126.9, 126.3, 120.3, 113.6, 107.2, 100.2, 55.6, 55.5, 28.0, 27.1, 27.0, 26.9, 26.7. HRMS (FAB) calcd for  $\text{C}_{34}\text{H}_{42}\text{NO}_4\text{Si}$  ( $\text{M}+\text{H}^+$ ) 556.2878, found 556.2879.

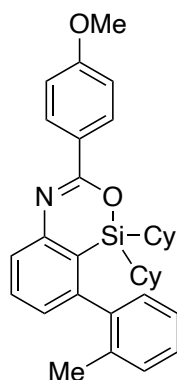

**Scheme 2, compound 3m.** Hexane/EtOAc = 10/1 was used for silica gel chromatography. White amorphous. 86% yield (65.5 mg).

$^1\text{H}$  NMR ( $\text{CDCl}_3$ ):  $\delta$  8.18 (d,  $^3J_{\text{HH}} = 7.8$  Hz, 2H), 7.44 (td,  $^3J_{\text{HH}} = 7.8$  Hz and  $^4J_{\text{HH}} = 0.9$  Hz, 1H), 7.38 (d,  $^3J_{\text{HH}} = 7.8$  Hz, 1H), 7.35-7.20 (m, 3H), 7.15 (d,  $^3J_{\text{HH}} = 7.3$  Hz, 1H), 7.01 (d,  $^3J_{\text{HH}} = 7.3$  Hz, 1H), 6.96 (d,  $^3J_{\text{HH}} = 8.3$  Hz, 2H), 3.88 (s, 3H), 2.19 (s, 3H), 1.78-1.46 (m, 8H), 1.42-0.79 (m, 12H), 0.79-0.64 (m, 1H), 0.35 (tt,  $^3J_{\text{HH}} = 12.6$  and 2.7 Hz, 1H).  $^{13}\text{C}\{^1\text{H}\}$  NMR ( $\text{CDCl}_3$ ):  $\delta$  162.0, 154.6, 151.3, 146.7, 142.9, 136.5, 130.53, 130.51, 130.1, 129.4, 128.1, 127.5, 127.3, 126.7, 125.7, 121.0, 113.6, 55.5, 28.0, 27.9, 27.8, 27.7, 27.3, 26.9, 26.8, 26.7, 25.8, 20.4. HRMS (FAB) calcd for  $\text{C}_{33}\text{H}_{40}\text{NO}_2\text{Si}$  ( $\text{M}+\text{H}^+$ ) 510.2823, found 510.2827.

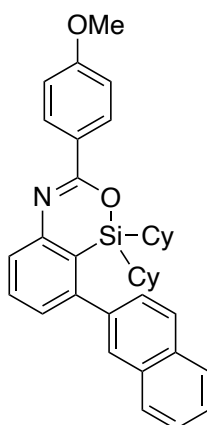

**Scheme 2, compound 3n.** Hexane/EtOAc = 9/1 was used for silica gel chromatography. White amorphous. 93% yield (76.2 mg).

$^1\text{H}$  NMR ( $\text{CDCl}_3$ ):  $\delta$  8.19 (d,  $^3J_{\text{HH}} = 8.7$  Hz, 2H), 7.97-7.80 (m, 3H), 7.76 (s, 1H), 7.60-7.45 (m, 4H), 7.43 (d,  $^3J_{\text{HH}} = 7.8$  Hz, 1H), 7.18 (d,  $^3J_{\text{HH}} = 7.3$  Hz, 1H), 6.97 (d,  $^3J_{\text{HH}} = 8.7$  Hz, 2H), 3.88 (s, 3H), 1.63-1.43 (m, 10H), 1.31-1.16 (m, 2H), 1.12-0.90 (m, 6H), 0.87-0.71 (m, 2H), 0.61 (t,  $^3J_{\text{HH}} = 12.6$  Hz, 2H).  $^{13}\text{C}\{^1\text{H}\}$  NMR ( $\text{CDCl}_3$ ):  $\delta$  162.0, 154.6, 151.1, 147.9, 141.5, 133.1, 132.8, 130.9, 130.1, 128.1, 128.0, 127.9, 127.7, 127.4, 126.9, 126.8, 126.3, 120.8, 113.6, 55.5, 27.9, 27.8, 27.04, 27.03, 26.9, 26.6. HRMS (FAB) calcd for  $\text{C}_{36}\text{H}_{40}\text{NO}_2\text{Si}$  ( $\text{M}+\text{H}^+$ ) 546.2823, found 546.2823.

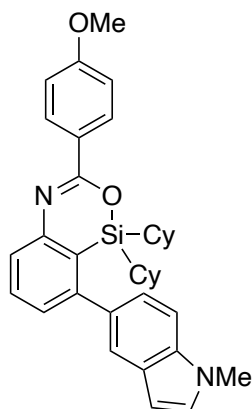

**Scheme 2, compound 3o.** Hexane/EtOAc = 8/1 was used for silica gel chromatography. White amorphous. 95% yield (78.5 mg).

$^1\text{H}$  NMR ( $\text{CDCl}_3$ ):  $\delta$  8.19 (d,  $^3J_{\text{HH}} = 9.2$  Hz, 2H), 7.53 (s, 1H), 7.45 (t,  $^3J_{\text{HH}} = 7.8$  Hz, 1H), 7.37 (dd,  $^3J_{\text{HH}} = 7.8$  Hz and  $^4J_{\text{HH}} = 1.4$  Hz, 1H), 7.36 (d,  $^3J_{\text{HH}} = 8.3$  Hz, 1H), 7.19 (dd,  $^3J_{\text{HH}} = 8.2$  Hz and  $^4J_{\text{HH}} = 1.4$  Hz, 1H), 7.15 (dd,  $^3J_{\text{HH}} = 7.8$  Hz and  $^4J_{\text{HH}} = 1.4$  Hz, 1H), 7.13 (d,  $^3J_{\text{HH}} = 3.2$  Hz, 1H), 6.97 (d,  $^3J_{\text{HH}} = 9.2$  Hz, 2H), 6.51 (d,  $^3J_{\text{HH}} = 3.2$  Hz, 1H), 3.88 (s, 3H), 3.87 (s, 3H), 1.63-1.45 (m, 10H), 1.32-1.17 (m, 2H), 1.13-0.93 (m, 6H), 0.87-0.73 (m, 2H), 0.62 (t,  $^3J_{\text{HH}} = 12.8$  Hz, 2H).  $^{13}\text{C}\{^1\text{H}\}$  NMR ( $\text{CDCl}_3$ ):  $\delta$  161.9, 154.5, 150.9, 149.3, 136.4, 135.3, 130.6, 130.1, 129.8, 128.5, 127.7, 127.3, 126.2, 122.9, 121.2, 121.1, 113.6, 108.9, 101.2, 55.5, 33.1, 27.94, 27.88, 27.04, 26.96, 26.7. HRMS (FAB) calcd for  $\text{C}_{35}\text{H}_{41}\text{N}_2\text{O}_2\text{Si}$  ( $\text{M}+\text{H}^+$ ) 549.2932, found 549.2934.

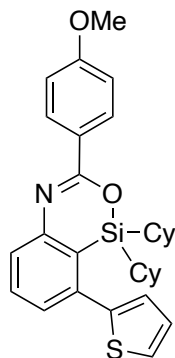

**Scheme 2, compound 3p.** Hexane/EtOAc = 10/1 was used for silica gel chromatography. White amorphous. 90% yield (68.1 mg).

$^1\text{H}$  NMR ( $\text{CDCl}_3$ ):  $\delta$  8.18 (d,  $^3J_{\text{HH}} = 9.2$  Hz, 2H), 7.44 (t,  $^3J_{\text{HH}} = 7.6$  Hz, 1H), 7.39 (d,  $^3J_{\text{HH}} = 7.8$  Hz, 1H), 7.37 (dd,  $^3J_{\text{HH}} = 5.0$  Hz and  $^4J_{\text{HH}} = 0.9$  Hz, 1H), 7.20 (dd,  $^3J_{\text{HH}} = 7.8$  Hz and  $^4J_{\text{HH}} = 1.4$  Hz, 1H), 7.09 (dd,  $^3J_{\text{HH}} = 5.0$  and 3.2 Hz, 1H), 7.02-6.88 (m, 3H), 3.88 (s, 3H), 1.78-1.47 (m, 10H), 1.40-1.25 (m, 2H), 1.21-1.01 (m, 6H), 0.98-0.85 (m, 2H), 0.77 (tt,  $^3J_{\text{HH}} = 12.4$  and 2.5 Hz, 2H).  $^{13}\text{C}\{^1\text{H}\}$  NMR ( $\text{CDCl}_3$ ):  $\delta$  162.1, 154.8, 151.2, 145.2, 139.7, 130.8, 130.2, 128.1, 127.7, 127.32, 127.26, 126.4, 126.0, 121.8, 113.6, 55.5, 27.9, 27.8, 27.3, 27.1, 27.0, 26.6. HRMS (FAB) calcd for  $\text{C}_{30}\text{H}_{36}\text{NO}_2\text{SSi}$  ( $\text{M}+\text{H}^+$ ) 502.2231, found 502.2234.

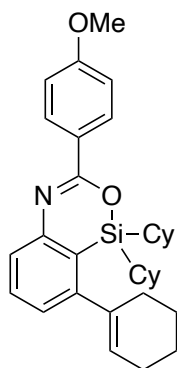

**Scheme 2, compound 3q.** Hexane/EtOAc = 9/1 was used for silica gel chromatography. White amorphous. 98% yield (73.4 mg).

$^1\text{H}$  NMR ( $\text{CDCl}_3$ ):  $\delta$  8.18 (d,  $^3J_{\text{HH}} = 8.7$  Hz, 2H), 7.37 (t,  $^3J_{\text{HH}} = 7.8$  Hz, 1H), 7.26 (dd,  $^3J_{\text{HH}} = 7.8$  Hz and  $^4J_{\text{HH}} = 0.9$  Hz, 1H), 7.00 (dd,  $^3J_{\text{HH}} = 7.8$  Hz and  $^4J_{\text{HH}} = 1.4$  Hz, 1H), 6.96 (d,  $^3J_{\text{HH}} = 9.2$  Hz, 2H), 5.62-5.57 (m, 1H), 3.88 (s, 3H), 2.39-2.31 (m, 2H), 2.24-2.15 (m, 2H), 2.00-1.90 (m, 2H), 1.86-1.51 (m, 12H), 1.51-1.38 (m, 2H), 1.32-1.00 (m, 10H).  $^{13}\text{C}\{^1\text{H}\}$  NMR ( $\text{CDCl}_3$ ):  $\delta$  161.9, 154.5, 151.4, 150.2, 141.4, 130.7, 130.1, 127.6, 126.4, 124.6, 119.2, 113.6, 55.5, 30.5, 28.2, 28.0, 27.7, 27.6, 27.5, 26.8, 25.5, 23.2, 22.0. HRMS (FAB) calcd for  $\text{C}_{32}\text{H}_{42}\text{NO}_2\text{Si}$  ( $\text{M}+\text{H}^+$ ) 500.2979, found 500.2981.

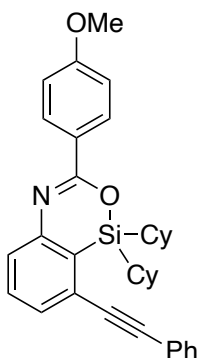

**Scheme 2, compound 3r.** Hexane/EtOAc = 9/1 was used for silica gel chromatography. White amorphous. 93% yield (72.7 mg).

$^1\text{H}$  NMR ( $\text{CDCl}_3$ ):  $\delta$  8.18 (d,  $^3J_{\text{HH}} = 8.7$  Hz, 2H), 7.57-7.51 (m, 2H), 7.46-7.34 (m, 6H), 6.97 (d,  $^3J_{\text{HH}} = 8.7$  Hz, 2H), 3.88 (s, 3H), 1.97-1.84 (m, 2H), 1.80-1.57 (m, 8H), 1.50-1.10 (m, 12H).  $^{13}\text{C}\{^1\text{H}\}$  NMR ( $\text{CDCl}_3$ ):  $\delta$  162.2, 154.9, 151.1, 131.5, 131.2, 130.2, 129.5, 128.7, 128.6, 128.2, 127.5, 127.2, 123.4, 123.3, 113.7, 91.0, 90.8, 55.5, 27.9, 27.2, 26.72, 26.65, 25.6. HRMS (FAB) calcd for  $\text{C}_{34}\text{H}_{38}\text{NO}_2\text{Si}$  ( $\text{M}+\text{H}^+$ ) 520.2666, found 520.2670.

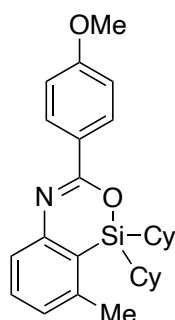

**Scheme 2, compound 3s.** The reaction was conducted at 100 °C. Hexane/EtOAc = 8/1 was used for silica gel chromatography. White amorphous. 78% yield (50.5 mg).

$^1\text{H}$  NMR ( $\text{CDCl}_3$ ):  $\delta$  8.16 (d,  $^3J_{\text{HH}} = 8.7$  Hz, 2H), 7.34 (t,  $^3J_{\text{HH}} = 7.8$  Hz, 1H), 7.22 (d,  $^3J_{\text{HH}} = 7.8$  Hz, 1H), 7.00 (d,  $^3J_{\text{HH}} = 7.3$  Hz, 1H), 6.96 (d,  $^3J_{\text{HH}} = 8.7$  Hz, 2H), 3.87 (s, 3H), 2.39 (s, 3H), 1.94-1.85 (m, 2H), 1.79-1.52 (m, 8H), 1.47-1.33 (m, 2H), 1.33-1.10 (m, 10H).  $^{13}\text{C}\{^1\text{H}\}$  NMR ( $\text{CDCl}_3$ ):  $\delta$  162.0, 153.8, 151.1, 142.0, 131.2, 130.0, 127.6, 127.0, 125.7, 119.9, 113.6, 55.5, 27.93, 27.88, 27.3, 26.8, 26.7, 26.3, 23.5. HRMS (FAB) calcd for  $\text{C}_{27}\text{H}_{36}\text{NO}_2\text{Si}$  ( $\text{M}+\text{H}^+$ ) 434.2510, found 434.2517.

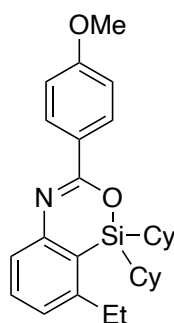

**Scheme 2, compound 3t.** The reaction was conducted at 100 °C. Hexane/EtOAc = 11/1 was used for silica gel chromatography. White amorphous. 74% yield (49.9 mg).

$^1\text{H}$  NMR ( $\text{CDCl}_3$ ):  $\delta$  8.16 (d,  $^3J_{\text{HH}} = 8.7$  Hz, 2H), 7.40 (t,  $^3J_{\text{HH}} = 7.8$  Hz, 1H), 7.23 (d,  $^3J_{\text{HH}} = 7.8$  Hz, 1H), 7.09 (d,  $^3J_{\text{HH}} = 7.8$  Hz, 1H), 6.96 (d,  $^3J_{\text{HH}} = 9.2$  Hz, 2H), 3.87 (s, 3H), 2.61 (q,  $^3J_{\text{HH}} = 7.5$  Hz, 2H), 1.95-1.85 (m, 2H), 1.79-1.53 (m, 8H), 1.46-1.34 (m, 2H), 1.31 (t,  $^3J_{\text{HH}} = 7.3$  Hz, 3H), 1.34-1.09 (m, 10H).  $^{13}\text{C}\{^1\text{H}\}$  NMR ( $\text{CDCl}_3$ ):  $\delta$  161.9, 153.7, 151.0, 148.5, 131.4, 130.0, 127.7, 126.0, 124.9, 119.4, 113.6, 55.5, 30.4, 27.93, 27.89, 27.4, 26.9, 26.7, 15.7. HRMS (FAB) calcd for  $\text{C}_{28}\text{H}_{38}\text{NO}_2\text{Si}$  ( $\text{M}+\text{H}^+$ ) 448.2666, found 448.2667.

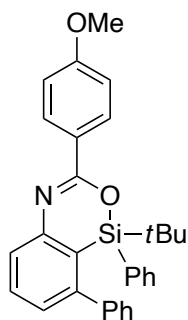



**Scheme 2, compound 3b.** Hexane/EtOAc = 10/1 was used for silica gel chromatography. White amorphous. 90% yield (62.5 mg).

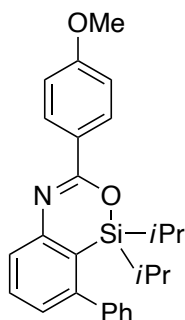

**Scheme 2, compound 3u.** Hexane/EtOAc = 10/1 was used for silica gel chromatography. White amorphous. 94% yield (58.3 mg).

$^1\text{H}$  NMR ( $\text{CDCl}_3$ ):  $\delta$  8.17 (d,  $^3J_{\text{HH}} = 9.0$  Hz, 2H), 7.47 (t,  $^3J_{\text{HH}} = 7.8$  Hz, 1H), 7.44-7.32 (m, 6H), 7.11 (dd,  $^3J_{\text{HH}} = 7.3$  and  $^4J_{\text{HH}} = 1.2$  Hz, 1H), 6.95 (d,  $^3J_{\text{HH}} = 9.0$  Hz, 2H), 3.87 (s, 3H), 0.97 (d,  $^3J_{\text{HH}} = 7.1$  Hz, 6H), 0.95-0.83 (m, 2H), 0.74 (d,  $J = 7.3$  Hz, 6H).  $^{13}\text{C}\{^1\text{H}\}$  NMR ( $\text{CDCl}_3$ ):  $\delta$  162.1, 154.7, 151.1, 148.1, 144.2, 131.0, 130.1, 129.0, 128.5, 127.9, 127.4, 126.92, 126.87, 120.7, 113.6, 55.5, 17.4, 16.9, 15.3. HRMS (FAB) calcd for  $\text{C}_{26}\text{H}_{30}\text{NO}_2\text{Si}$  ( $\text{M}+\text{H}^+$ ) 416.2040, found 416.2037.

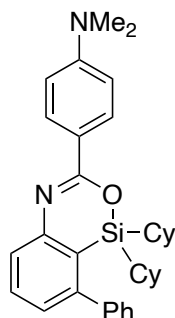

**Scheme 3, compound 3w.** Hexane/EtOAc = 8/1 was used for silica gel chromatography. White amorphous. 76% yield (58.2 mg).

$^1\text{H}$  NMR ( $\text{CDCl}_3$ ):  $\delta$  8.11 (d,  $^3J_{\text{HH}} = 9.2$  Hz, 2H), 7.47-7.29 (m, 7H), 7.05 (dd,  $^3J_{\text{HH}} = 7.4$  Hz and  $^4J_{\text{HH}} = 1.4$  Hz, 1H), 6.74 (d,  $^3J_{\text{HH}} = 9.2$  Hz, 2H), 3.05 (s, 6H), 1.69-1.45 (m, 10H), 1.34-1.21 (m, 2H), 1.15-0.96 (m, 6H), 0.90-0.76 (m, 2H), 0.60 (tt,  $^3J_{\text{HH}} = 12.8$  and 2.8 Hz, 2H).  $^{13}\text{C}\{^1\text{H}\}$  NMR ( $\text{CDCl}_3$ ):  $\delta$  155.4, 152.3, 151.5, 147.9, 144.3, 130.7, 129.9, 129.0, 128.4, 127.7, 126.5, 126.1, 122.2, 120.4, 111.3, 40.3, 28.0, 27.9, 27.02, 27.00, 26.96, 26.6. HRMS (FAB) calcd for  $\text{C}_{33}\text{H}_{41}\text{N}_2\text{OSi}$  ( $\text{M}+\text{H}^+$ ) 509.2983, found 509.2989.

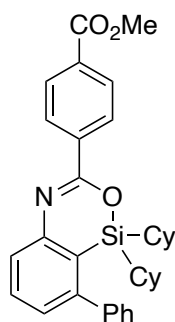

**Scheme 3, compound 3x.** Hexane/EtOAc = 9/1 was used for silica gel chromatography. White amorphous. 82% yield (64.4 mg).

$^1\text{H}$  NMR ( $\text{CDCl}_3$ ):  $\delta$  8.30 (d,  $^3J_{\text{HH}} = 8.1$  Hz, 2H), 8.12 (d,  $^3J_{\text{HH}} = 8.5$  Hz, 2H), 7.53-7.40 (m, 5H), 7.35-7.29 (m, 2H), 7.15 (d,  $^3J_{\text{HH}} = 8.3$  Hz, 1H), 3.95 (s, 3H), 1.70-1.43 (m, 10H), 1.31-1.19 (m, 2H), 1.14-0.99 (m, 6H), 0.85-0.74 (m, 2H), 0.65 (tt,  $^3J_{\text{HH}} = 12.7$  and 2.5 Hz, 2H).  $^{13}\text{C}\{^1\text{H}\}$  NMR ( $\text{CDCl}_3$ ):  $\delta$  166.9, 153.7, 150.2, 148.1, 143.9, 139.0, 132.1, 131.0, 129.6, 129.0, 128.5, 128.3, 128.0, 127.7, 127.2, 120.8, 52.4, 27.84, 27.82, 27.0, 26.9, 26.6. HRMS (FAB) calcd for  $\text{C}_{33}\text{H}_{38}\text{NO}_3\text{Si}$  ( $\text{M}+\text{H}^+$ ) 524.2615, found 524.2625.

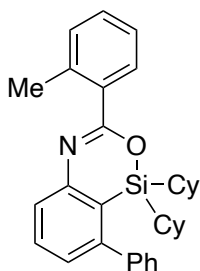

**Scheme 3, compound 3y.** Hexane/EtOAc = 11/1 was used for silica gel chromatography. White amorphous. 91% yield (65.2 mg).

$^1\text{H}$  NMR ( $\text{CDCl}_3$ ):  $\delta$  7.94-7.88 (m, 1H), 7.50-7.37 (m, 5H), 7.36-7.23 (m, 5H), 7.13 (d,  $^3J_{\text{HH}} = 7.3$  Hz, 1H), 2.68 (s, 3H), 1.69-1.45 (m, 10H), 1.30-0.98 (m, 8H), 0.94-0.80 (m, 2H), 0.63 (tt,  $^3J_{\text{HH}} = 12.6$  and 2.5 Hz, 2H).  $^{13}\text{C}\{^1\text{H}\}$  NMR ( $\text{CDCl}_3$ ):  $\delta$  156.5, 150.7, 148.0, 144.0, 138.2, 135.2, 131.6, 130.9, 129.8, 129.6, 129.1, 128.4, 127.9, 127.3, 127.0, 125.8, 120.2, 27.90, 27.88, 27.0, 26.9, 26.7, 22.3. HRMS (FAB) calcd for  $\text{C}_{32}\text{H}_{38}\text{NOSi}$  ( $\text{M}+\text{H}^+$ ) 480.2717, found 480.2724.

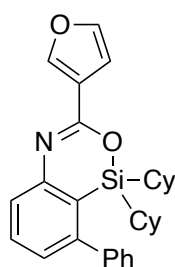

**Scheme 3, compound 3z.** Hexane/EtOAc = 10/1 was used for silica gel chromatography. White amorphous. 86% yield (59.2 mg).

$^1\text{H}$  NMR ( $\text{CDCl}_3$ ):  $\delta$  7.98 (s, 1H), 7.48-7.38 (m, 5H), 7.36-7.28 (m, 3H), 7.10 (dd,  $^3J_{\text{HH}} = 7.3$  Hz and  $^4J_{\text{HH}} = 0.9$  Hz, 1H), 6.92 (d,  $J_{\text{HH}} = 1.8$  Hz, 1H), 1.68-1.42 (m, 10H), 1.28-1.15 (m, 2H), 1.14-0.96 (m, 6H), 0.88-0.74 (m, 2H), 0.59 (tt,  $^3J_{\text{HH}} = 12.6$  and 2.8 Hz, 2H).  $^{13}\text{C}\{^1\text{H}\}$  NMR ( $\text{CDCl}_3$ ):  $\delta$  151.3, 150.6, 148.0, 145.3, 144.0, 143.6, 130.9, 129.0, 128.4, 127.9, 127.0, 126.6, 124.2, 120.7, 109.9, 27.9, 27.8, 26.93, 26.87, 26.6. HRMS (FAB) calcd for  $\text{C}_{29}\text{H}_{34}\text{NO}_2\text{Si}$  ( $\text{M}+\text{H}^+$ ) 456.2353, found 456.2360.

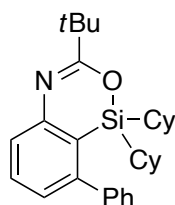

**Scheme 2, compound 3aa.** Hexane/EtOAc = 10/1 was used for silica gel chromatography. White amorphous. 95% yield (63.5 mg).

$^1\text{H}$  NMR ( $\text{CDCl}_3$ ):  $\delta$  7.45-7.36 (m, 4H), 7.32-7.23 (m, 3H), 7.05 (d,  $^3J_{\text{HH}} = 7.8$  Hz, 1H), 1.70-1.39 (m, 10H), 1.36-0.97 (m, 8H), 1.31 (s, 9H), 0.87-0.71 (m, 2H), 0.58 (tt,  $^3J_{\text{HH}} = 12.8$  and 2.7 Hz, 2H).  $^{13}\text{C}\{^1\text{H}\}$  NMR ( $\text{CDCl}_3$ ):  $\delta$  165.8, 150.9, 147.8, 144.2, 130.7, 129.1, 128.3, 127.7, 126.9, 126.8, 120.1, 39.0, 28.3, 27.93, 27.91, 27.2, 26.81, 26.79, 26.77. HRMS (FAB) calcd for  $\text{C}_{29}\text{H}_{40}\text{NOSi}$  ( $\text{M}+\text{H}^+$ ) 446.2874, found 446.2876.

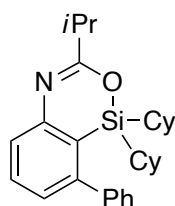

**Scheme 3, compound 3bb.** Hexane/EtOAc = 9/1 was used for silica gel chromatography. White amorphous. 74% yield (47.8 mg).

$^1\text{H}$  NMR ( $\text{CDCl}_3$ ):  $\delta$  7.44-7.35 (m, 4H), 7.31-7.21 (m, 3H), 7.05 (d,  $^3J_{\text{HH}} = 7.3$  Hz, 1H), 2.70 (sept,  $^3J_{\text{HH}} = 6.8$  Hz, 1H), 1.68-1.39 (m, 10H), 1.27 (d,  $^3J_{\text{HH}} = 6.9$  Hz, 6H), 1.25-0.97 (m, 8H), 0.85-0.70 (m, 2H), 0.58 (tt,  $^3J_{\text{HH}} = 12.6$  and 2.5 Hz, 2H).  $^{13}\text{C}\{^1\text{H}\}$  NMR ( $\text{CDCl}_3$ ):  $\delta$  164.7, 150.7, 147.9, 144.1, 130.8, 129.1, 128.4, 127.8, 126.9, 126.4, 120.2, 36.6, 27.90, 27.88, 27.1, 26.8, 26.7, 20.3. HRMS (FAB) calcd for  $\text{C}_{28}\text{H}_{38}\text{NOSi}$  ( $\text{M}+\text{H}^+$ ) 432.2717, found 432.2719.

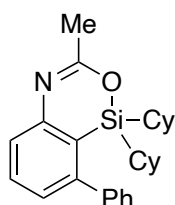

**Scheme 3, compound 3cc.** Hexane/EtOAc = 9/1 was used for silica gel chromatography. White

amorphous. 62% yield (37.7 mg).

$^1\text{H}$  NMR ( $\text{CDCl}_3$ ):  $\delta$  7.45-7.36 (m, 4H), 7.31-7.26 (m, 2H), 7.22 (dd,  $^3J_{\text{HH}} = 8.2$  Hz and  $^4J_{\text{HH}} = 0.9$  Hz, 1H), 7.08 (dd,  $^3J_{\text{HH}} = 7.3$  Hz and  $^4J_{\text{HH}} = 0.9$  Hz, 1H), 2.22 (s, 3H), 1.69-1.38 (m, 10H), 1.24-0.96 (m, 8H), 0.83-0.68 (m, 2H), 0.62-0.50 (m, 2H).  $^{13}\text{C}\{^1\text{H}\}$  NMR ( $\text{CDCl}_3$ ):  $\delta$  158.9, 150.5, 147.9, 144.1, 130.9, 129.0, 128.4, 127.8, 126.9, 125.9, 120.1, 27.89, 27.86, 26.9, 26.8, 26.72, 26.70, 24.1. HRMS (FAB) calcd for  $\text{C}_{26}\text{H}_{34}\text{NOSi}$  ( $\text{M}+\text{H}^+$ ) 404.2404, found 404.2401.

### Reaction of 2-(Dimethyl(phenyl)silyl)-3-(4-methoxybenzamido)phenyl trifluoromethanesulfonate to Give 2-(4-Methoxyphenyl)benzo[d]oxazole.

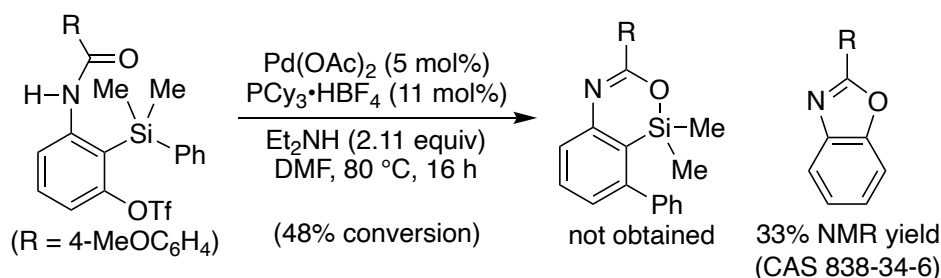

$^1\text{H}$  NMR ( $\text{CDCl}_3$ ):  $\delta$  8.20 (d,  $^3J_{\text{HH}} = 9.2$  Hz, 2H), 7.77-7.72 (m, 1H), 7.58-7.53 (m, 1H), 7.37-7.28 (m, 2H), 7.04 (d,  $^3J_{\text{HH}} = 9.2$  Hz, 2H), 3.90 (s, 3H).  $^{13}\text{C}\{^1\text{H}\}$  NMR ( $\text{CDCl}_3$ ):  $\delta$  163.3, 162.5, 150.8, 142.4, 129.5, 124.7, 124.6, 119.9, 119.8, 114.5, 110.5, 55.6.

### Procedure for Equation 1.

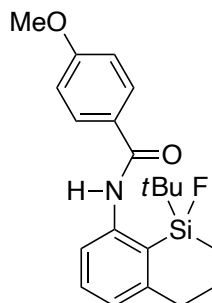

$\text{Et}_2\text{NH}$  (33.0  $\mu\text{L}$ , 0.320 mmol) and DMF (0.6 mL) were added to a mixture of compound **1v** (75.2 mg, 0.150 mmol),  $\text{Pd}(\text{OAc})_2$  (1.7 mg, 7.5  $\mu\text{mol}$ ), and  $\text{PCy}_3\cdot\text{HBF}_4$  (6.1 mg, 17  $\mu\text{mol}$ ), and the resulting solution was stirred for 16 h at 100 °C. The reaction was quenched with  $\text{H}_2\text{O}$  and this was extracted with  $\text{Et}_2\text{O}$ . The organic layer was washed with saturated  $\text{NaCl}$  aq, dried over  $\text{Na}_2\text{SO}_4$ , filtered, and concentrated under vacuum. The residue was chromatographed on silica gel with hexane/ $\text{EtOAc} = 10/1 \rightarrow 6/1$  and the resulting solid was washed with hexane to afford compound **4v** as a white solid (23.2 mg, 62.4  $\mu\text{mol}$ ; 42% yield). The structure was confirmed by X-ray crystallographic analysis after recrystallization from  $\text{CH}_2\text{Cl}_2$ /hexane.

$^1\text{H}$  NMR ( $\text{CDCl}_3$ ):  $\delta$  8.68-8.57 (m, 1H), 8.16-8.08 (m, 1H), 7.91 (d,  $^3J_{\text{HH}} = 8.7$  Hz, 2H), 7.39 (t,  $^3J_{\text{HH}} = 8.0$  Hz, 1H), 7.03-6.94 (m, 3H), 3.88 (s, 3H), 2.86-2.76 (m, 1H), 2.57-2.46 (m, 1H), 2.21-2.09 (m, 1H), 1.68-1.52 (m, 1H), 1.20-1.09 (m, 2H), 0.90 (s, 9H).  $^{13}\text{C}\{^1\text{H}\}$  NMR ( $\text{CDCl}_3$ ):  $\delta$  164.6, 162.6,

151.2 (d,  $^3J_{CF} = 3.8$  Hz), 144.2 (d,  $^3J_{CF} = 2.9$  Hz), 131.4, 129.0, 126.9, 125.2 (d,  $^4J_{CF} = 1.9$  Hz), 120.8, 119.9 (d,  $^2J_{CF} = 13.4$  Hz), 114.1, 55.6, 35.8, 25.5, 21.8 (d,  $^3J_{CF} = 1.9$  Hz), 19.6 (d,  $^2J_{CF} = 14.4$  Hz), 9.6 (d,  $^2J_{CF} = 10.5$  Hz).  $^{19}\text{F}$  NMR ( $\text{CDCl}_3$ ):  $\delta -165.9$  (s). HRMS (FAB) calcd for  $\text{C}_{21}\text{H}_{27}\text{FNO}_2\text{Si}$  ( $\text{M}+\text{H}^+$ ) 372.1790, found 372.1793.

To elucidate the origin of the fluoride on silicon, the reaction of **1v** was also conducted by using free  $\text{PCy}_3$  without  $\text{HBF}_4$  as the ligand, which gave compound **S3** as the major product in 32% yield with no formation of compound **4v**. This result indicates that the fluoride of compound **4v** comes from  $\text{BF}_4^-$  of the phosphine ligand salt, although the exact reaction mechanism is unclear at this stage.

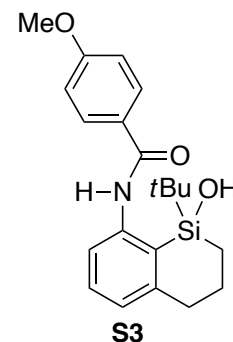

### General Procedure for Equations 2 and 3.

1,2,2,6,6-Pentamethylpiperidine (57.0  $\mu\text{L}$ , 0.320 mmol) and DMF (0.6 mL) were added to a mixture of compound **1** (0.150 mmol),  $\text{Pd}(\text{OAc})_2$  (1.7 mg, 7.5  $\mu\text{mol}$ ), and  $\text{PCy}_3 \cdot \text{HBF}_4$  (6.1 mg, 17  $\mu\text{mol}$ ), and the resulting solution was stirred for 16 h at 80  $^\circ\text{C}$ . The reaction was quenched with  $\text{H}_2\text{O}$  and this was extracted with  $\text{Et}_2\text{O}$ . The organic layer was washed with saturated  $\text{NaCl}$ aq, dried over  $\text{Na}_2\text{SO}_4$ , filtered, and concentrated under vacuum. The residue was chromatographed on silica gel with hexane/ $\text{EtOAc}$  (containing 2 vol% of  $\text{Et}_3\text{N}$ ) to afford compound **3** or **5**.

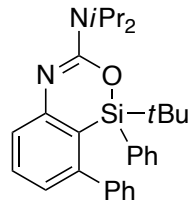

**Equation 2, compound 3dd.** Hexane/ $\text{EtOAc}$  = 10/1 was used for silica gel chromatography. Yellow amorphous. 81% yield (55.5 mg).

$^1\text{H}$  NMR ( $\text{CDCl}_3$ ):  $\delta$  7.54-7.46 (m, 2H), 7.43-7.37 (m, 1H), 7.37-7.28 (m, 3H), 7.18 (tt,  $^3J_{\text{HH}} = 7.3$  Hz and  $^4J_{\text{HH}} = 1.4$  Hz, 1H), 7.11-7.02 (m, 3H), 6.99 (d,  $^3J_{\text{HH}} = 7.3$  Hz, 2H), 6.77 (dd,  $^3J_{\text{HH}} = 7.3$  Hz and  $^4J_{\text{HH}} = 1.4$  Hz, 1H), 4.42-3.96 (m, 2H), 1.27 (d,  $^3J_{\text{HH}} = 6.9$  Hz, 6H), 1.18 (d,  $^3J_{\text{HH}} = 6.9$  Hz, 6H), 0.79 (s, 9H).  $^{13}\text{C}\{^1\text{H}\}$  NMR ( $\text{CDCl}_3$ ):  $\delta$  154.8, 151.4, 148.5, 144.6, 136.5, 135.0, 131.2, 130.04, 129.97, 128.0, 127.9, 127.1, 124.4, 123.3, 115.9, 46.0, 27.1, 21.5, 21.4, 20.6. HRMS (FAB) calcd for  $\text{C}_{29}\text{H}_{37}\text{N}_2\text{OSi}$  ( $\text{M}+\text{H}^+$ ) 457.2670, found 457.2673.

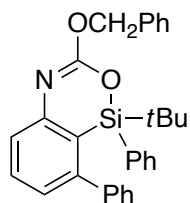

**Equation 2, compound 3ee.** Hexane/EtOAc = 10/1 was used for silica gel chromatography. Yellow viscous oil. 80% yield (55.3 mg).

$^1\text{H}$  NMR ( $\text{CDCl}_3$ ):  $\delta$  7.49-7.27 (m, 12H), 7.23 (t,  $^3J_{\text{HH}} = 7.6$  Hz, 1H), 7.10 (t,  $^3J_{\text{HH}} = 7.8$  Hz, 2H), 7.01-6.94 (m, 3H), 5.41 (d,  $^2J_{\text{HH}} = 12.4$  Hz, 1H), 5.37 (d,  $^2J_{\text{HH}} = 12.4$  Hz, 1H), 0.78 (s, 9H).  $^{13}\text{C}\{^1\text{H}\}$  NMR ( $\text{CDCl}_3$ ):  $\delta$  152.4, 151.8, 148.8, 143.8, 136.6, 135.4, 135.14, 135.05, 131.4, 130.4, 130.1, 128.5, 128.4, 128.1, 128.0, 127.5, 126.5, 125.5, 117.9, 69.9, 26.6, 20.9. HRMS (FAB) calcd for  $\text{C}_{30}\text{H}_{29}\text{NO}_2\text{Si}$  ( $\text{M}^+$ ) 463.1968, found 463.1987.

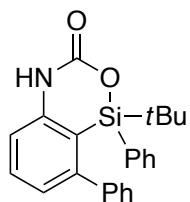

**Equation 3, compound 5ff.** Hexane/EtOAc = 4/1  $\rightarrow$  1/1 was used for silica gel chromatography. White solid. 67% yield (37.8 mg).

$^1\text{H}$  NMR ( $\text{CDCl}_3$ ):  $\delta$  8.46 (s, 1H), 7.49-7.36 (m, 4H), 7.33 (t,  $^3J_{\text{HH}} = 7.6$  Hz, 2H), 7.28-7.20 (m, 1H), 7.10 (t,  $^3J_{\text{HH}} = 7.6$  Hz, 2H), 6.99-6.86 (m, 4H), 0.84 (s, 9H).  $^{13}\text{C}\{^1\text{H}\}$  NMR ( $\text{CDCl}_3$ ):  $\delta$  151.1, 149.5, 145.2, 143.0, 135.1, 134.1, 131.8, 130.7, 130.0, 128.2, 128.1, 127.8, 125.6, 115.7, 113.3, 26.6, 20.8. HRMS (FAB) calcd for  $\text{C}_{23}\text{H}_{23}\text{NO}_2\text{Si}$  ( $\text{M}^+$ ) 373.1498, found 373.1512.

#### Procedure for Scheme 4a.

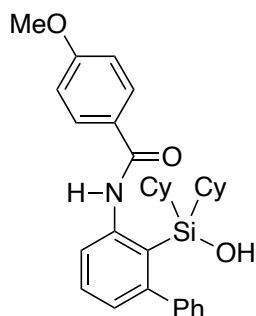

$\text{H}_2\text{O}$  (2 mL) was added to compound **3c** (74.4 mg, 0.150 mmol) and the mixture was stirred for 40 h at 110  $^\circ\text{C}$ . After cooled to room temperature, this was extracted with  $\text{Et}_2\text{O}$ . The organic layer was washed with saturated NaCl(aq), dried over  $\text{Na}_2\text{SO}_4$ , filtered, and concentrated under vacuum. The residue was chromatographed on silica gel with hexane/EtOAc = 3/1  $\rightarrow$  2/1 to afford compound **6** as a white solid (69.5 mg, 0.135 mmol; 90% yield).

$^1\text{H}$  NMR ( $\text{CDCl}_3$ ):  $\delta$  10.84 (s, 1H), 8.36 (dd,  $^3J_{\text{HH}} = 8.2$  Hz and  $^4J_{\text{HH}} = 0.9$  Hz, 1H), 8.00 (d,  $^3J_{\text{HH}} = 8.7$  Hz, 2H), 7.45-7.35 (m, 4H), 7.29-7.21 (m, 2H), 7.01-6.91 (m, 3H), 3.88 (s, 3H), 2.31 (bs, 1H), 1.68-1.48 (m, 10H), 1.18-0.91 (m, 10H), 0.17 (t,  $^3J_{\text{HH}} = 12.4$  Hz, 2H).  $^{13}\text{C}\{^1\text{H}\}$  NMR ( $\text{CDCl}_3$ ):  $\delta$  165.5, 162.2, 149.3, 145.8, 144.5, 129.6, 129.4, 129.3, 128.10, 128.07, 127.6, 126.1, 123.6, 121.8, 113.8, 55.5, 28.0, 27.9, 27.8, 27.6, 27.0, 26.8. HRMS (FAB) calcd for  $\text{C}_{32}\text{H}_{40}\text{NO}_3\text{Si}$  ( $\text{M}+\text{H}^+$ ) 514.2772, found 514.2770.

#### Procedure for Scheme 4b.

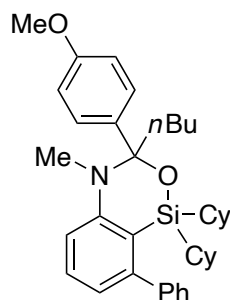

Methyl trifluoromethanesulfonate (18.0  $\mu\text{L}$ , 0.165 mmol) was added dropwise to a solution of compound **3c** (74.4 mg, 0.150 mmol) in toluene (1 mL) at room temperature, and the mixture was stirred for 14 h at 90  $^\circ\text{C}$ . This was cooled to  $-78$   $^\circ\text{C}$ , and *n*BuLi (105  $\mu\text{L}$ , 0.165 mmol; 1.57 M solution in hexane) was added dropwise to it. The resulting mixture was stirred for 1 h at 0  $^\circ\text{C}$  and for 5.5 h at room temperature. The reaction was quenched with  $\text{H}_2\text{O}$  and this was extracted with  $\text{Et}_2\text{O}$ . The organic layer was washed with saturated NaCl(aq), dried over  $\text{Na}_2\text{SO}_4$ , filtered, and concentrated under vacuum. The residue was purified by GPC with  $\text{CHCl}_3$  to afford compound **7** as a colorless oil (53.2 mg, 93.7  $\mu\text{mol}$ ; 62% yield).

$^1\text{H}$  NMR ( $\text{CDCl}_3$ ):  $\delta$  7.43-7.34 (m, 5H), 7.33-7.26 (m, 3H), 6.88-6.81 (m, 4H), 3.81 (s, 3H), 2.70 (s, 3H), 2.12 (ddd,  $^3J_{\text{HH}} = 13.3$ , 12.4, and 4.1 Hz, 1H), 1.82 (ddd,  $^3J_{\text{HH}} = 13.3$ , 12.4, and 4.1 Hz, 1H), 1.76-1.44 (m, 8H), 1.44-0.86 (m, 16H), 0.80 (t,  $^3J_{\text{HH}} = 7.3$  Hz, 3H), 0.58 (tt,  $^3J_{\text{HH}} = 12.6$  and 2.5 Hz, 1H), 0.26 (tt,  $^3J_{\text{HH}} = 12.4$  and 2.3 Hz, 1H).  $^{13}\text{C}\{^1\text{H}\}$  NMR ( $\text{CDCl}_3$ ):  $\delta$  158.5, 157.0, 147.9, 144.6, 136.0, 129.8, 129.2, 128.4, 128.0, 127.9, 127.3, 123.2, 119.8, 112.9, 91.6, 55.3, 40.6, 38.3, 28.51, 28.49, 28.4, 28.1, 27.9, 27.8, 27.5, 27.1, 27.03, 27.00, 23.0, 14.3. HRMS (FAB) calcd for  $\text{C}_{37}\text{H}_{50}\text{NO}_2\text{Si}$  ( $\text{M}+\text{H}^+$ ) 568.3605, found 568.3608.

#### Procedure for Scheme 4c.<sup>4</sup>

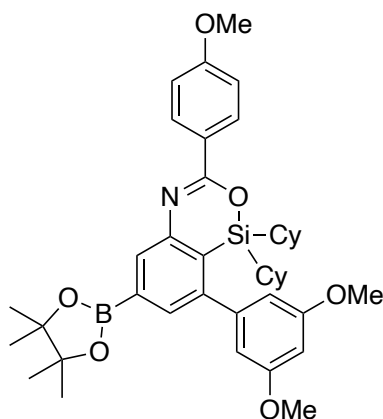

A solution of  $[\text{Ir}(\text{OMe})(\text{cod})]_2$  (6.2 mg, 19  $\mu\text{mol}$  Ir), 4,4'-di-*tert*-butyl-2,2'-bipyridyl (4.2 mg, 16  $\mu\text{mol}$ ), and bis(pinacolato)diboron (70.8 mg, 0.279 mmol) in THF (0.6 mL) was stirred for 10 min at room temperature. Compound **3i** (104 mg, 0.186 mmol) and THF (1.3 mL) were added to it, and this was stirred for 12 h at 70 °C. The reaction mixture was filtered through a pad of silica gel with EtOAc and concentrated under vacuum. The residue was purified by GPC with  $\text{CHCl}_3$  to afford compound **8** as a pale orange amorphous (111 mg, 0.162 mmol; 87% yield).

$^1\text{H}$  NMR ( $\text{CDCl}_3$ ):  $\delta$  8.19 (d,  $^3J_{\text{HH}} = 8.7$  Hz, 2H), 7.85 (d,  $^4J_{\text{HH}} = 0.9$  Hz, 1H), 7.53 (d,  $^4J_{\text{HH}} = 0.9$  Hz, 1H), 6.96 (d,  $^3J_{\text{HH}} = 9.2$  Hz, 2H), 6.53-6.47 (m, 3H), 3.87 (s, 3H), 3.83 (s, 6H), 1.76-1.47 (m, 10H), 1.44-1.18 (m, 2H), 1.35 (s, 12H), 1.18-0.97 (m, 6H), 0.95-0.81 (m, 2H), 0.74 (tt,  $^3J_{\text{HH}} = 12.6$  and 2.7 Hz, 2H).  $^{13}\text{C}\{^1\text{H}\}$  NMR ( $\text{CDCl}_3$ ):  $\delta$  162.0, 160.7, 154.4, 150.4, 147.2, 146.0, 133.2, 131.9, 130.1, 127.5, 123.6, 113.6, 107.2, 100.3, 84.0, 55.6, 55.5, 27.9, 27.03, 26.96, 26.8, 26.6, 25.0. HRMS (FAB) calcd for  $\text{C}_{40}\text{H}_{53}\text{BNO}_6\text{Si}$  ( $\text{M}+\text{H}^+$ ) 682.3730, found 682.3754.

#### Procedure for Scheme 5a.

$\text{Et}_2\text{NH}$  (31.0  $\mu\text{L}$ , 0.300 mmol) and DMF (0.6 mL) were added to a mixture of compound **1b** (46.0 mg, 75.0  $\mu\text{mol}$ ), compound **1d** (50.7 mg, 75.0  $\mu\text{mol}$ ),  $\text{Pd}(\text{OAc})_2$  (1.7 mg, 7.5  $\mu\text{mol}$ ), and  $\text{PCy}_3 \cdot \text{HBF}_4$  (6.1 mg, 17  $\mu\text{mol}$ ), and the mixture was stirred for 16 h at 80 °C. The reaction was quenched with  $\text{H}_2\text{O}$  and this was extracted with  $\text{Et}_2\text{O}$ . The organic layer was washed with saturated NaCl aq, dried over  $\text{Na}_2\text{SO}_4$ , filtered, and concentrated under vacuum. The yield of compounds **3b** and **3d** were determined to be 97% yield for both by  $^1\text{H}$  NMR against an internal standard ( $\text{MeNO}_2$ ), and no crossover products were obtained.



## Procedure for Scheme 5b.

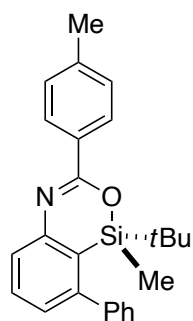

Et<sub>2</sub>NH (33.0  $\mu$ L, 0.320 mmol) and DMF (0.6 mL) were added to a mixture of compound (*R*)-**1gg** (80.3 mg, 0.150 mmol), Pd(OAc)<sub>2</sub> (1.7 mg, 7.5  $\mu$ mol), and PCy<sub>3</sub>•HBF<sub>4</sub> (6.1 mg, 17  $\mu$ mol), and the resulting solution was stirred for 22 h at 70 °C. The reaction was quenched with H<sub>2</sub>O and this was extracted with Et<sub>2</sub>O. The organic layer was washed with saturated NaCl<sub>aq</sub>, dried over Na<sub>2</sub>SO<sub>4</sub>, filtered, and concentrated under vacuum. The residue was chromatographed on silica gel with hexane/EtOAc = 10/1 (containing 2 vol% of Et<sub>3</sub>N) to afford compound **3gg** as a white amorphous (51.6 mg, 0.134 mmol; 89% yield). The ee was determined on a Daicel Chiralcel OD-H column with hexane/2-propanol = 95/5, flow = 0.7 mL/min. Retention times: 5.1 min [minor enantiomer], 6.2 min [major enantiomer]. 97% ee. [ $\alpha$ ]<sub>D</sub><sup>24</sup> +38.0 (*c* 0.62, CHCl<sub>3</sub>). The absolute configuration was determined to be *R* by X-ray crystallographic analysis after treatment with TfOH and recrystallization from CHCl<sub>3</sub>/pentane.

<sup>1</sup>H NMR (CDCl<sub>3</sub>):  $\delta$  8.10 (d, <sup>3</sup>J<sub>HH</sub> = 8.2 Hz, 2H), 7.48 (t, <sup>3</sup>J<sub>HH</sub> = 7.6 Hz, 1H), 7.44 (dd, <sup>3</sup>J<sub>HH</sub> = 8.2 Hz and <sup>4</sup>J<sub>HH</sub> = 1.8 Hz, 1H), 7.41-7.32 (m, 5H), 7.24 (d, <sup>3</sup>J<sub>HH</sub> = 7.8 Hz, 2H), 7.10 (dd, <sup>3</sup>J<sub>HH</sub> = 7.4 Hz and <sup>4</sup>J<sub>HH</sub> = 1.4 Hz, 1H), 2.41 (s, 3H), 0.62 (s, 9H), 0.40 (s, 3H). <sup>13</sup>C{<sup>1</sup>H} NMR (CDCl<sub>3</sub>):  $\delta$  154.6, 150.9, 148.5, 144.0, 141.3, 132.1, 131.0, 130.1, 129.1, 128.4, 128.0, 127.84, 127.75, 127.4, 121.0, 25.8, 21.7, 20.7, -0.5. HRMS (FAB) calcd for C<sub>25</sub>H<sub>28</sub>NOSi (M+H<sup>+</sup>) 386.1935, found 386.1938.

racemate

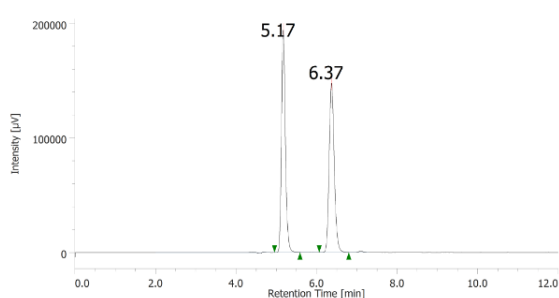

96.5% ee (*R*)

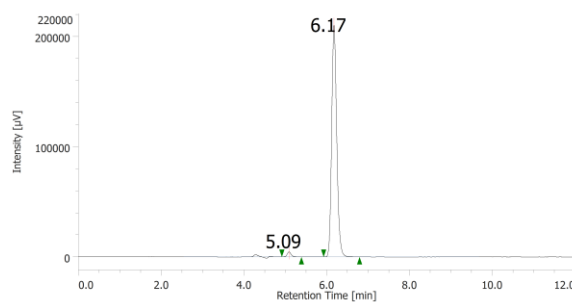

## General Procedure for Scheme 7.

Et<sub>2</sub>NH (31.0  $\mu$ L, 0.300 mmol) and DMA (0.6 mL) were added to a mixture of compound **1** (0.150 mmol), Pd(OAc)<sub>2</sub> (1.7 mg, 7.5  $\mu$ mol), and **L\*** (5.0 mg, 8.3  $\mu$ mol), and the resulting solution was stirred for 40 h at 40 °C. The reaction was quenched with H<sub>2</sub>O and this was extracted with Et<sub>2</sub>O. The organic layer was washed with saturated NaCl<sub>aq</sub>, dried over Na<sub>2</sub>SO<sub>4</sub>, filtered, and concentrated under vacuum. The residue was chromatographed on silica gel with hexane/EtOAc (containing 2 vol% of Et<sub>3</sub>N) to

afford compound **3**.

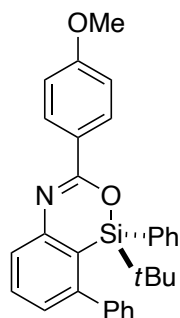

**Scheme 7, compound 3b.** Hexane/EtOAc = 10/1 was used for silica gel chromatography. White amorphous. 87% yield (60.6 mg). The ee was determined on a Daicel Chiralcel OD-H column with hexane/2-propanol = 100/1, flow = 0.7 mL/min. Retention times: 8.1 min [major enantiomer], 12.9 min [minor enantiomer]. 88% ee.  $[\alpha]^{17}_D -70.2$  (*c* 0.53, CHCl<sub>3</sub>). The absolute configuration was determined to be *R* by X-ray crystallographic analysis after recrystallization from CH<sub>2</sub>Cl<sub>2</sub>/hexane.

racemate

87.6% ee (*R*)

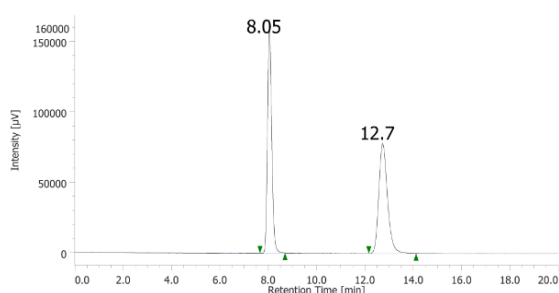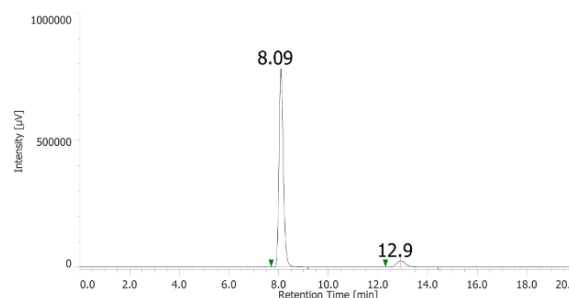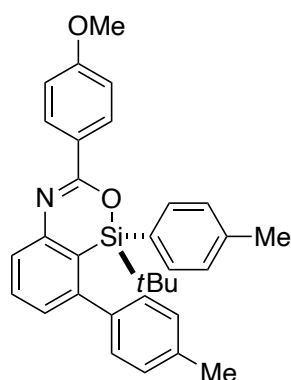

**Scheme 7, compound 3hh.** Hexane/EtOAc = 9/1 was used for silica gel chromatography. White amorphous. 89% yield (65.6 mg). The ee was determined on a Daicel Chiralcel OD-H column with hexane/2-propanol = 95/5, flow = 0.7 mL/min. Retention times: 5.6 min [major enantiomer], 6.7 min [minor enantiomer]. 85% ee.  $[\alpha]^{22}_D -19.4$  (*c* 0.54, CHCl<sub>3</sub>). The absolute configuration was assigned by analogy with compound **3b**.

<sup>1</sup>H NMR (CDCl<sub>3</sub>):  $\delta$  8.18 (d, <sup>3</sup>*J*<sub>HH</sub> = 9.2 Hz, 2H), 7.54-7.47 (m, 2H), 7.41 (d, <sup>3</sup>*J*<sub>HH</sub> = 7.8 Hz, 2H), 7.16 (d, <sup>3</sup>*J*<sub>HH</sub> = 7.8 Hz, 2H), 7.12-7.05 (m, 1H), 7.01-6.90 (m, 6H), 3.86 (s, 3H), 2.39 (s, 3H), 2.36 (s,

3H), 0.83 (s, 9H).  $^{13}\text{C}\{^1\text{H}\}$  NMR ( $\text{CDCl}_3$ ):  $\delta$  162.1, 154.2, 151.3, 148.7, 141.0, 140.2, 137.2, 135.2, 132.7, 131.2, 130.2, 130.0, 128.7, 127.9, 127.4, 127.2, 120.2, 113.6, 55.5, 26.7, 21.7, 21.3, 21.0. HRMS (FAB) calcd for  $\text{C}_{32}\text{H}_{34}\text{NO}_2\text{Si}$  ( $\text{M}+\text{H}^+$ ) 492.2353, found 492.2358.

racemate

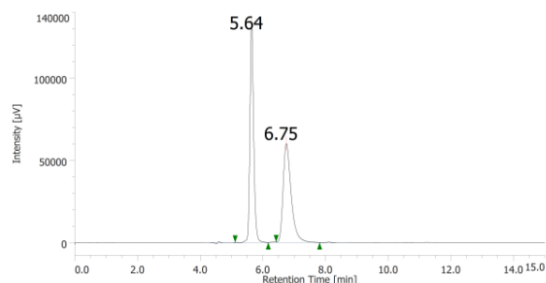

85.2% ee

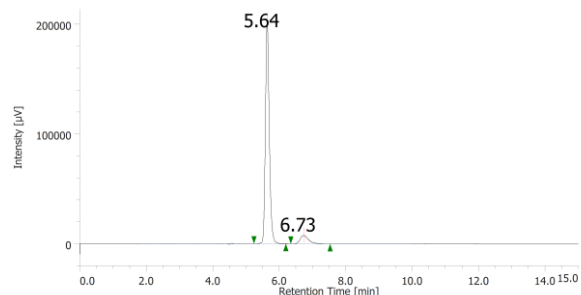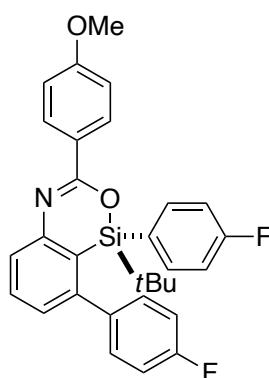

**Scheme 7, compound 3ii.** Hexane/EtOAc = 9/1 was used for silica gel chromatography. White amorphous. 89% yield (66.8 mg). The ee was determined on a Daicel Chiralcel OD-H column with hexane/2-propanol = 95/5, flow = 0.7 mL/min. Retention times: 5.8 min [major enantiomer], 7.5 min [minor enantiomer]. 73% ee.  $[\alpha]_{\text{D}}^{19} -78.9$  ( $c$  0.50,  $\text{CHCl}_3$ ). The absolute configuration was assigned by analogy with compound **3b**.

$^1\text{H}$  NMR ( $\text{CDCl}_3$ ):  $\delta$  8.15 (d,  $^3J_{\text{HH}} = 8.7$  Hz, 2H), 7.53-7.48 (m, 2H), 7.44 (dd,  $^3J_{\text{HH}} = 8.7$  Hz and  $^4J_{\text{HF}} = 6.0$  Hz, 2H), 7.07-6.99 (m, 3H), 6.97-6.88 (m, 4H), 6.81 (t,  $^3J_{\text{HH}} = 8.9$  Hz, 2H), 3.86 (s, 3H), 0.85 (s, 9H).  $^{13}\text{C}\{^1\text{H}\}$  NMR ( $\text{CDCl}_3$ ):  $\delta$  164.4 (d,  $^1J_{\text{CF}} = 251$  Hz), 162.5 (d,  $^1J_{\text{CF}} = 247$  Hz), 162.3, 154.2, 151.3, 147.5, 139.6 (d,  $^4J_{\text{CF}} = 2.9$  Hz), 137.3 (d,  $^3J_{\text{CF}} = 8.6$  Hz), 131.8 (d,  $^3J_{\text{CF}} = 8.6$  Hz), 131.4, 131.3 (d,  $^4J_{\text{CF}} = 3.8$  Hz), 130.2, 128.1, 127.7, 127.1, 119.7, 115.4 (d,  $^2J_{\text{CF}} = 19.2$  Hz), 114.8 (d,  $^2J_{\text{CF}} = 21.1$  Hz), 113.8, 55.5, 26.6, 21.2. HRMS (FAB) calcd for  $\text{C}_{30}\text{H}_{28}\text{F}_2\text{NO}_2\text{Si}$  ( $\text{M}+\text{H}^+$ ) 500.1852, found 500.1868.

racemate

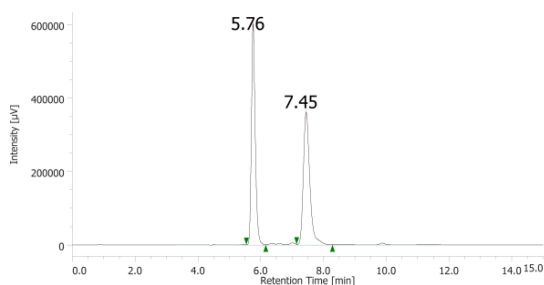

72.9% ee

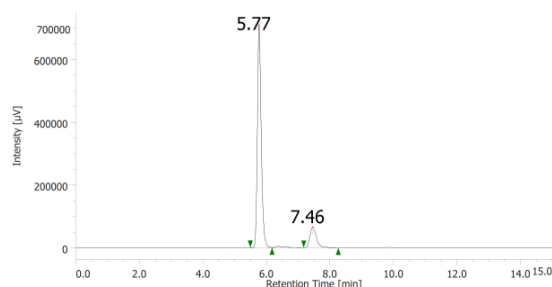

The ee of compound **3ii** could be improved by recrystallisation. Compound **3ii** (40.0 mg, 80.1  $\mu\text{mol}$ ; 73% ee) was dissolved in hexane (6.0 mL) at 60  $^{\circ}\text{C}$ , and the solution was slowly cooled to  $-35$   $^{\circ}\text{C}$  to give colorless crystals (28.9 mg, 57.7  $\mu\text{mol}$ ; 72% yield, 93% ee).

racemate

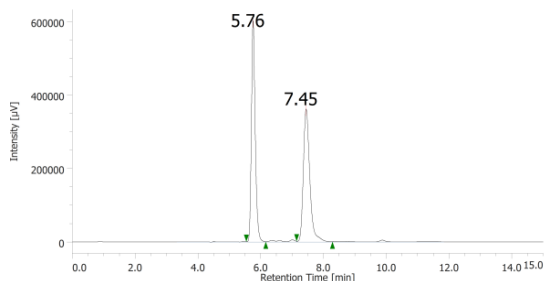

93.3% ee

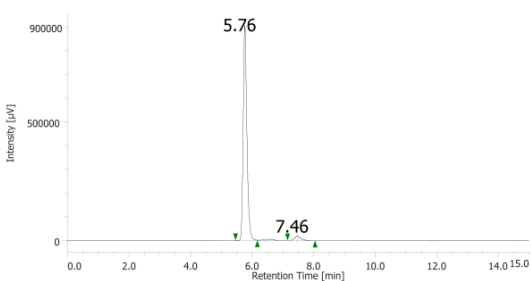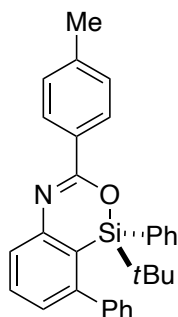

**Scheme 7, compound 3jj.** Hexane/EtOAc = 10/1 was used for silica gel chromatography. White amorphous. 88% yield (59.4 mg). The ee was determined on a Daicel Chiralcel OD-H column with hexane/2-propanol = 100/1, flow = 0.7 mL/min. Retention times: 6.0 min [major enantiomer], 7.4 min [minor enantiomer]. 88% ee.  $[\alpha]_D^{23} -66.2$  (*c* 0.52,  $\text{CHCl}_3$ ). The absolute configuration was assigned by analogy with compound **3b**.

$^1\text{H}$  NMR ( $\text{CDCl}_3$ ):  $\delta$  8.11 (d,  $^3J_{\text{HH}} = 8.3$  Hz, 2H), 7.55-7.46 (m, 4H), 7.41 (tt,  $^3J_{\text{HH}} = 7.3$  Hz and  $^4J_{\text{HH}} = 2.1$  Hz, 1H), 7.32 (t,  $^3J_{\text{HH}} = 7.3$  Hz, 2H), 7.28-7.20 (m, 3H), 7.17-7.06 (m, 3H), 7.00 (d,  $^3J_{\text{HH}} = 6.8$  Hz, 2H), 2.41 (s, 3H), 0.82 (s, 9H).  $^{13}\text{C}\{^1\text{H}\}$  NMR ( $\text{CDCl}_3$ ):  $\delta$  154.4, 151.1, 148.7, 143.6, 141.4, 136.0, 135.2, 132.0, 131.3, 130.3, 130.2, 129.1, 128.5, 128.2, 128.1, 128.0, 127.6, 127.5, 120.0, 26.6, 21.7, 21.2. HRMS (FAB) calcd for  $\text{C}_{30}\text{H}_{30}\text{NOSi}$  ( $\text{M}+\text{H}^+$ ) 448.2091, found 448.2098.

racemate

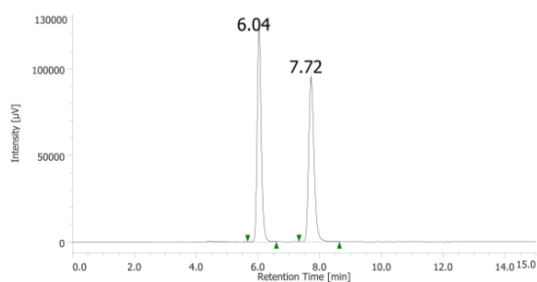

88.1% ee

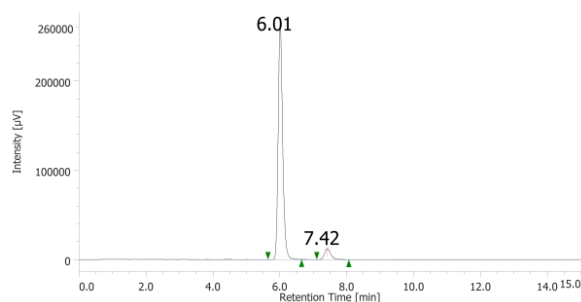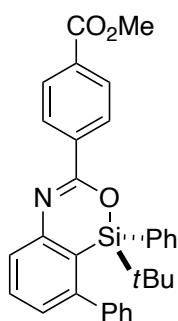

**Scheme 7, compound 3kk.** Hexane/EtOAc = 8/1 was used for silica gel chromatography. White amorphous. 92% yield (67.5 mg). The ee was determined on a Daicel Chiralcel OD-H column with hexane/2-propanol = 100/1, flow = 0.7 mL/min. Retention times: 9.0 min [major enantiomer], 10.8 min [minor enantiomer]. 80% ee.  $[\alpha]_D^{19} -48.1$  ( $c$  0.54,  $\text{CHCl}_3$ ). The absolute configuration was assigned by analogy with compound **3b**.

$^1\text{H}$  NMR ( $\text{CDCl}_3$ ):  $\delta$  8.27 (d,  $^3J_{\text{HH}} = 8.7$  Hz, 2H), 8.08 (d,  $^3J_{\text{HH}} = 8.7$  Hz, 2H), 7.57-7.51 (m, 2H), 7.50-7.45 (m, 2H), 7.43 (tt,  $^3J_{\text{HH}} = 7.6$  Hz and  $^4J_{\text{HH}} = 2.3$  Hz, 1H), 7.33 (t,  $^3J_{\text{HH}} = 7.3$  Hz, 2H), 7.28-7.22 (m, 1H), 7.21-7.08 (m, 3H), 6.99 (d,  $^3J_{\text{HH}} = 7.3$  Hz, 2H), 3.94 (s, 3H), 0.81 (s, 9H).  $^{13}\text{C}$   $\{^1\text{H}\}$  NMR ( $\text{CDCl}_3$ ):  $\delta$  166.9, 153.2, 150.6, 148.9, 143.4, 138.9, 135.8, 135.2, 132.1, 131.4, 130.4, 130.2, 129.6, 128.9, 128.3, 128.2, 128.1, 128.0, 127.7, 120.2, 52.4, 26.6, 21.1. HRMS (FAB) calcd for  $\text{C}_{31}\text{H}_{30}\text{NO}_3\text{Si}$  ( $\text{M}+\text{H}^+$ ) 492.1989, found 492.1987.

racemate

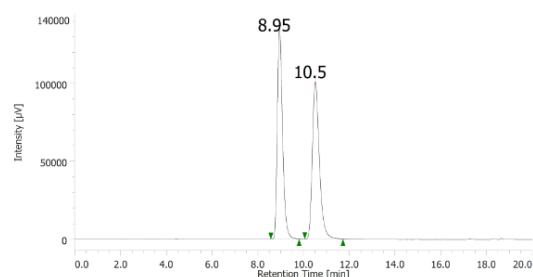

79.9% ee

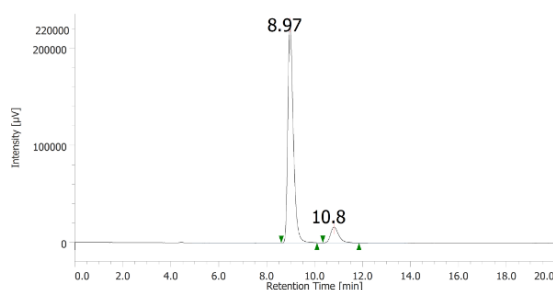

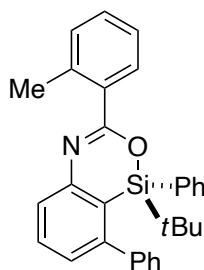

**Scheme 7, compound 3II.** The reaction was conducted for 16 h at 60 °C. Hexane/EtOAc = 10/1 was used for silica gel chromatography. White amorphous. 93% yield (62.4 mg). The ee was determined on a Daicel Chiralcel OD-H column with hexane/2-propanol = 100/1, flow = 0.7 mL/min. Retention times: 5.7 min [major enantiomer], 6.2 min [minor enantiomer]. 79% ee.  $[\alpha]_D^{23} +10.0$  (*c* 0.55, CHCl<sub>3</sub>). The absolute configuration was assigned by analogy with compound **3b**.

<sup>1</sup>H NMR (CDCl<sub>3</sub>): δ 7.85 (d, <sup>3</sup>J<sub>HH</sub> = 6.8 Hz, 1H), 7.56-7.48 (m, 4H), 7.43 (t, <sup>3</sup>J<sub>HH</sub> = 6.8 Hz, 1H), 7.34 (t, <sup>3</sup>J<sub>HH</sub> = 7.4 Hz, 2H), 7.31-7.18 (m, 4H), 7.15-7.08 (m, 3H), 7.01 (d, <sup>3</sup>J<sub>HH</sub> = 7.4 Hz, 2H), 2.61 (s, 3H), 0.80 (s, 9H). <sup>13</sup>C{<sup>1</sup>H} NMR (CDCl<sub>3</sub>): δ 155.9, 151.1, 148.7, 143.7, 138.4, 136.2, 135.1, 134.7, 131.6, 131.3, 130.3, 130.1, 130.0, 129.9, 128.4, 128.2, 128.1, 127.63, 127.59, 125.8, 119.7, 26.7, 22.3, 20.9. HRMS (FAB) calcd for C<sub>30</sub>H<sub>30</sub>NOSi (M+H<sup>+</sup>) 448.2091, found 448.2093.

racemate

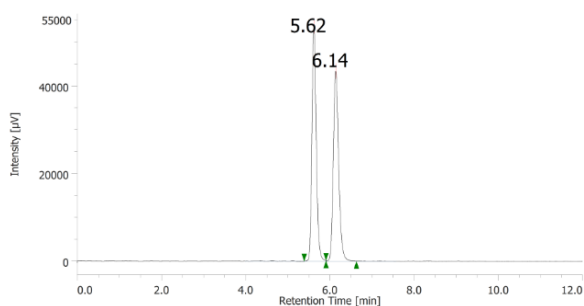

78.8% ee

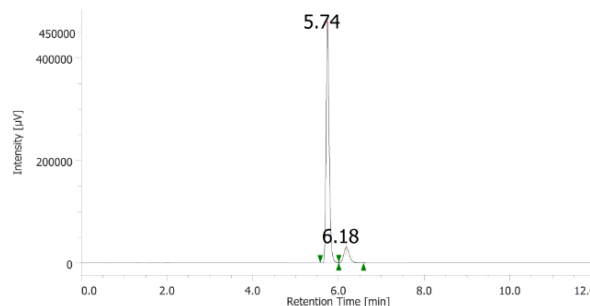

## IV. X-ray Crystal Structure

### Compound (*R*)-S2

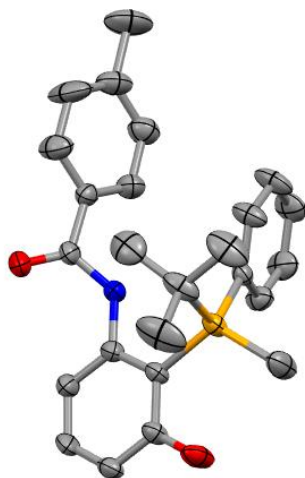

A colorless ethyl acetate solution of compound (*R*)-S2 was prepared. Crystals suitable for X-ray analysis were obtained by slow evaporation of the solvent at room temperature under hexane atmosphere. The crystal structure has been deposited at the Cambridge Crystallographic Data Centre (deposition number: CCDC 2194996). The data can be obtained free of charge via the Internet at <https://www.ccdc.cam.ac.uk/structures/>.

### Crystal Data and Structure Refinement.

|                      |                                                      |         |
|----------------------|------------------------------------------------------|---------|
| Empirical Formula    | C <sub>27.5</sub> H <sub>32</sub> NO <sub>2</sub> Si |         |
| Formula Weight       | 439.65                                               |         |
| Temperature          | 293 ± 2 K                                            |         |
| Wavelength           | 0.71075 Å                                            |         |
| Crystal System       | Orthorhombic                                         |         |
| Space Group          | P2 <sub>1</sub> 2 <sub>1</sub> 2                     |         |
| Unit Cell Dimensions | a = 14.2116(14) Å                                    | α = 90° |
|                      | b = 19.3311(19) Å                                    | β = 90° |
|                      | c = 9.9202(9) Å                                      | γ = 90° |
| Volume               | 2725.3(5) Å <sup>3</sup>                             |         |

|                                   |                                                 |
|-----------------------------------|-------------------------------------------------|
| Z Value                           | 4                                               |
| Calculated Density                | 1.072 g/cm <sup>3</sup>                         |
| Absorption coefficient            | 0.108 mm <sup>-1</sup>                          |
| F(000)                            | 948                                             |
| Crystal size                      | 0.500 x 0.500 x 0.300 mm                        |
| Theta Range for Data Collection   | 3.054–27.546°                                   |
| Index Ranges                      | -18 ≤ h ≤ 18, -18 ≤ k ≤ 25, -12 ≤ l ≤ 11        |
| Reflections Collected             | 15527                                           |
| Independent Reflections           | 6127 [R(int) = 0.0204]                          |
| Completeness to Theta = 25.242°   | 99.4%                                           |
| Absorption Correction             | Semi-empirical from equivalents                 |
| Max. and Min. Transmission        | 0.948 and 0.968                                 |
| Refinement Method                 | Full-matrix least-squares on F <sup>2</sup>     |
| Data / Restraints / Parameters    | 6127 / 0 / 279                                  |
| Goodness-of-Fit on F <sup>2</sup> | 1.025                                           |
| Final R Indices [I > 2σ(I)]       | R1 = 0.0542, wR2 = 0.1488                       |
| R Indices (All Data)              | R1 = 0.0722, wR2 = 0.1614                       |
| Absolute Structure Parameter      | 0.07(3)                                         |
| Largest Diff. Peak and Hole       | 0.437 and -0.175 e <sup>-</sup> /Å <sup>3</sup> |



## Compound (*R*)-3gg•HOTf

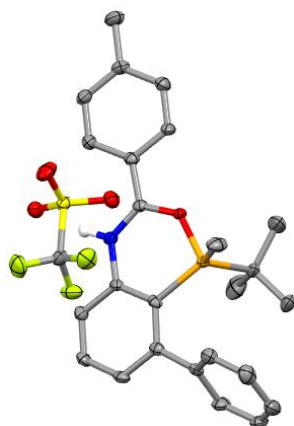

TfOH (6.9  $\mu$ L, 77.8  $\mu$ mol) was added to a solution of compound (*R*)-**3gg** (15.0 mg, 38.9  $\mu$ mol) in 1,2-dichloroethane (0.5 mL) at room temperature. The mixture was concentrated under vacuum and the resulting solid was washed with Et<sub>2</sub>O. A colorless CHCl<sub>3</sub> solution of this compound was prepared. Crystals suitable for X-ray analysis were obtained by slow evaporation of the solvent at room temperature under pentane atmosphere. The crystal structure has been deposited at the Cambridge Crystallographic Data Centre (deposition number: CCDC 2194997). The data can be obtained free of charge via the Internet at <https://www.ccdc.cam.ac.uk/structures/>.

### Crystal Data and Structure Refinement.

|                      |                                                                                       |                                                          |
|----------------------|---------------------------------------------------------------------------------------|----------------------------------------------------------|
| Empirical Formula    | C <sub>26</sub> H <sub>28</sub> F <sub>3</sub> NO <sub>4</sub> SSi                    |                                                          |
| Formula Weight       | 535.64                                                                                |                                                          |
| Temperature          | 113 $\pm$ 2 K                                                                         |                                                          |
| Wavelength           | 0.71075 $\text{\AA}$                                                                  |                                                          |
| Crystal System       | Monoclinic                                                                            |                                                          |
| Space Group          | P2 <sub>1</sub>                                                                       |                                                          |
| Unit Cell Dimensions | a = 9.145(2) $\text{\AA}$<br>b = 19.109(5) $\text{\AA}$<br>c = 15.052(4) $\text{\AA}$ | $\alpha$ = 90°<br>$\beta$ = 98.006(6)°<br>$\gamma$ = 90° |
| Volume               | 2604.7(11) $\text{\AA}^3$                                                             |                                                          |

|                                   |                                                 |
|-----------------------------------|-------------------------------------------------|
| Z Value                           | 4                                               |
| Calculated Density                | 1.366 g/cm <sup>3</sup>                         |
| Absorption coefficient            | 0.225 mm <sup>-1</sup>                          |
| F(000)                            | 1120                                            |
| Crystal size                      | 0.500 x 0.100 x 0.100 mm                        |
| Theta Range for Data Collection   | 3.099–27.567°                                   |
| Index Ranges                      | -11 ≤ h ≤ 11, -24 ≤ k ≤ 24, -19 ≤ l ≤ 19        |
| Reflections Collected             | 49778                                           |
| Independent Reflections           | 11925 [R(int) = 0.0758]                         |
| Completeness to Theta = 25.242°   | 99.7%                                           |
| Absorption Correction             | Semi-empirical from equivalents                 |
| Max. and Min. Transmission        | 0.896 and 0.978                                 |
| Refinement Method                 | Full-matrix least-squares on F <sup>2</sup>     |
| Data / Restraints / Parameters    | 11925 / 1 / 659                                 |
| Goodness-of-Fit on F <sup>2</sup> | 0.989                                           |
| Final R Indices [I > 2σ(I)]       | R1 = 0.0493, wR2 = 0.1167                       |
| R Indices (All Data)              | R1 = 0.0645, wR2 = 0.1225                       |
| Absolute Structure Parameter      | -0.02(4)                                        |
| Largest Diff. Peak and Hole       | 1.055 and -0.435 e <sup>-</sup> /Å <sup>3</sup> |

## Compound (*R*)-3b

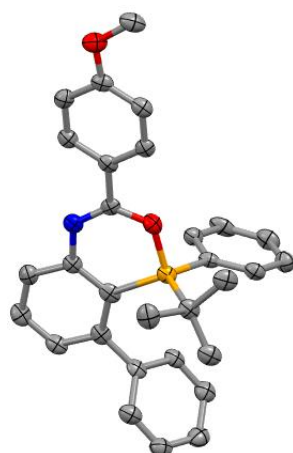

A colorless dichloromethane solution of compound (*R*)-**3b** was prepared. Crystals suitable for X-ray analysis were obtained by slow evaporation of the solvent at room temperature under hexane atmosphere. The crystal structure has been deposited at the Cambridge Crystallographic Data Centre (deposition number: CCDC 2194998). The data can be obtained free of charge via the Internet at <https://www.ccdc.cam.ac.uk/structures/>.

### Crystal Data and Structure Refinement.

|                      |                                                      |                                       |
|----------------------|------------------------------------------------------|---------------------------------------|
| Empirical Formula    | C <sub>30</sub> H <sub>29</sub> NO <sub>2</sub> Si   |                                       |
| Formula Weight       | 463.63                                               |                                       |
| Temperature          | 113 ± 2 K                                            |                                       |
| Wavelength           | 0.71075 Å                                            |                                       |
| Crystal System       | Monoclinic                                           |                                       |
| Space Group          | P2 <sub>1</sub>                                      |                                       |
| Unit Cell Dimensions | a = 9.521(3) Å<br>b = 12.367(3) Å<br>c = 11.509(3) Å | α = 90°<br>β = 112.719(6)°<br>γ = 90° |
| Volume               | 1250.0(6) Å <sup>3</sup>                             |                                       |

|                                   |                                                 |
|-----------------------------------|-------------------------------------------------|
| Z Value                           | 2                                               |
| Calculated Density                | 1.232 g/cm <sup>3</sup>                         |
| Absorption coefficient            | 0.121 mm <sup>-1</sup>                          |
| F(000)                            | 492                                             |
| Crystal size                      | 0.200 x 0.200 x 0.100 mm                        |
| Theta Range for Data Collection   | 3.536–27.480°                                   |
| Index Ranges                      | -12 ≤ h ≤ 11, -16 ≤ k ≤ 15, -14 ≤ l ≤ 14        |
| Reflections Collected             | 22935                                           |
| Independent Reflections           | 5645 [R(int) = 0.1207]                          |
| Completeness to Theta = 25.242°   | 99.7%                                           |
| Absorption Correction             | Semi-empirical from equivalents                 |
| Max. and Min. Transmission        | 0.976 and 0.988                                 |
| Refinement Method                 | Full-matrix least-squares on F <sup>2</sup>     |
| Data / Restraints / Parameters    | 5645 / 1 / 311                                  |
| Goodness-of-Fit on F <sup>2</sup> | 0.908                                           |
| Final R Indices [I > 2σ(I)]       | R1 = 0.0598, wR2 = 0.1253                       |
| R Indices (All Data)              | R1 = 0.0820, wR2 = 0.1305                       |
| Absolute Structure Parameter      | 0.02(12)                                        |
| Largest Diff. Peak and Hole       | 0.665 and -0.395 e <sup>-</sup> /Å <sup>3</sup> |

## Compound 4v

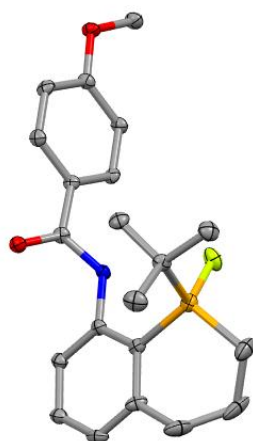

A colorless  $\text{CH}_2\text{Cl}_2$  solution of compound **4v** was prepared. Crystals suitable for X-ray analysis were obtained by layering hexane and slow diffusion of the solvents at room temperature. The crystal structure has been deposited at the Cambridge Crystallographic Data Centre (deposition number: CCDC 2247904). The data can be obtained free of charge via the Internet at <https://www.ccdc.cam.ac.uk/structures/>.

### Crystal Data and Structure Refinement.

|                      |                                                            |                                                                                            |
|----------------------|------------------------------------------------------------|--------------------------------------------------------------------------------------------|
| Empirical Formula    | $\text{C}_{21}\text{H}_{26}\text{FNO}_2\text{Si}$          |                                                                                            |
| Formula Weight       | 371.52                                                     |                                                                                            |
| Temperature          | $113 \pm 2$ K                                              |                                                                                            |
| Wavelength           | 0.71075 Å                                                  |                                                                                            |
| Crystal System       | Triclinic                                                  |                                                                                            |
| Space Group          | P-1                                                        |                                                                                            |
| Unit Cell Dimensions | $a = 9.572(3)$ Å<br>$b = 12.507(5)$ Å<br>$c = 17.419(6)$ Å | $\alpha = 108.6130(10)^\circ$<br>$\beta = 90.260(7)^\circ$<br>$\gamma = 92.4160(10)^\circ$ |
| Volume               | $1974.2(12)$ Å <sup>3</sup>                                |                                                                                            |

|                                   |                                                 |
|-----------------------------------|-------------------------------------------------|
| Z Value                           | 4                                               |
| Calculated Density                | 1.250 g/cm <sup>3</sup>                         |
| Absorption coefficient            | 0.143 mm <sup>-1</sup>                          |
| F(000)                            | 792                                             |
| Crystal size                      | 0.200 x 0.200 x 0.050 mm                        |
| Theta Range for Data Collection   | 3.153–27.344°                                   |
| Index Ranges                      | -11 ≤ h ≤ 12, -16 ≤ k ≤ 15, -22 ≤ l ≤ 22        |
| Reflections Collected             | 35709                                           |
| Independent Reflections           | 8865 [R(int) = 0.1274]                          |
| Completeness to Theta = 25.242°   | 99.8%                                           |
| Absorption Correction             | Semi-empirical from equivalents                 |
| Max. and Min. Transmission        | 0.993 and 0.972                                 |
| Refinement Method                 | Full-matrix least-squares on F <sup>2</sup>     |
| Data / Restraints / Parameters    | 8865 / 0 / 485                                  |
| Goodness-of-Fit on F <sup>2</sup> | 1.045                                           |
| Final R Indices [I > 2σ(I)]       | R1 = 0.0828, wR2 = 0.2023                       |
| R Indices (All Data)              | R1 = 0.1466, wR2 = 0.2222                       |
| Largest Diff. Peak and Hole       | 0.901 and -0.466 e <sup>-</sup> /Å <sup>3</sup> |

# V. $^1\text{H}$ and $^{13}\text{C}$ NMR spectra

compound **1b**

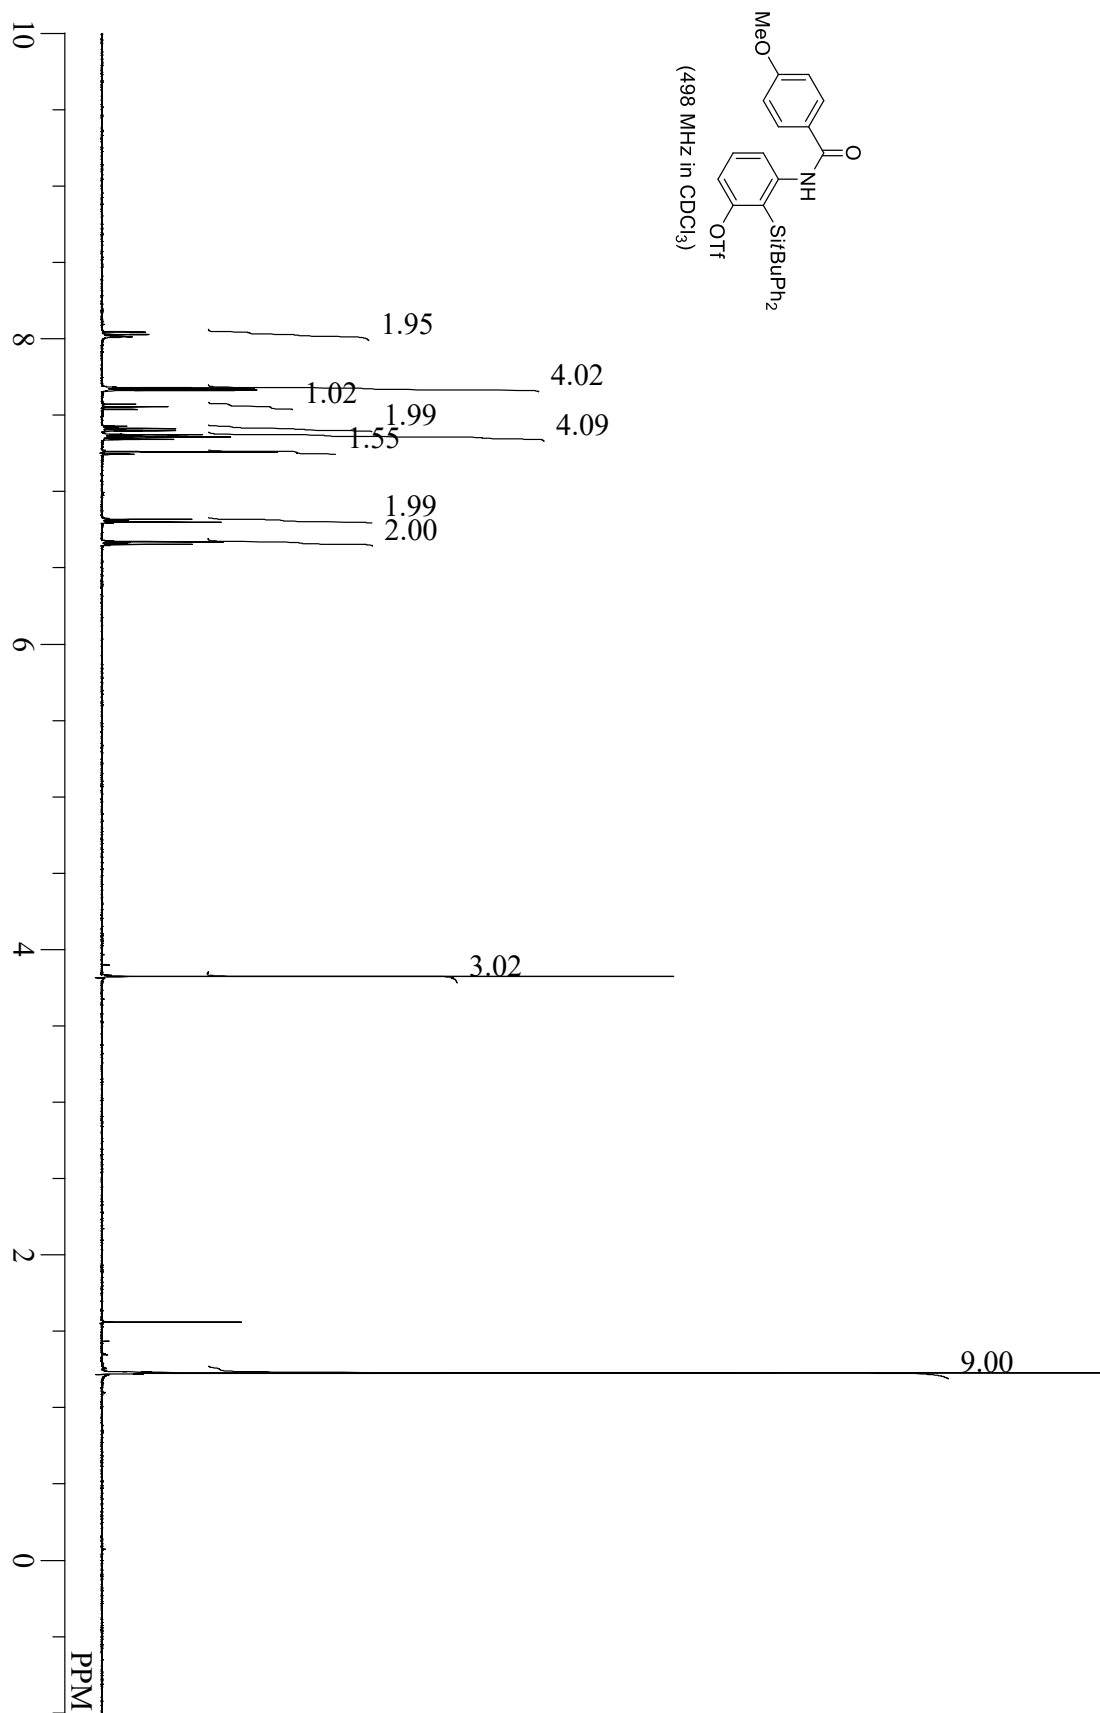

compound **1b**

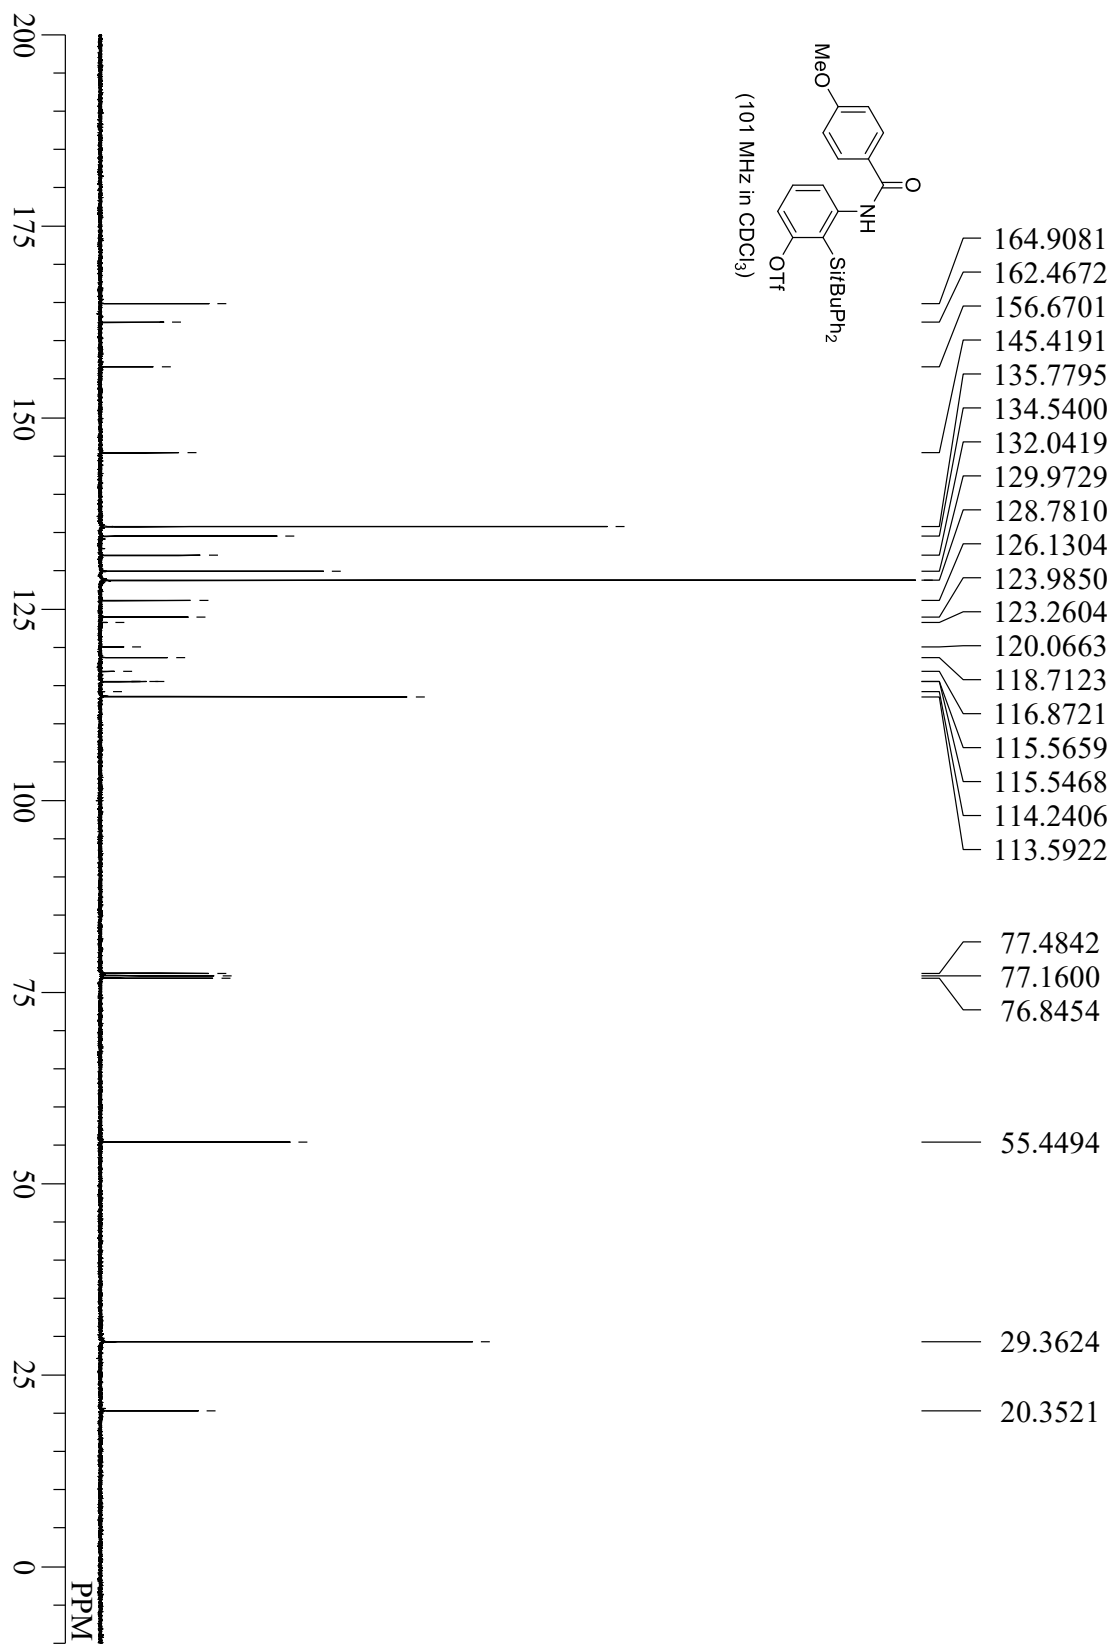



compound **1c**

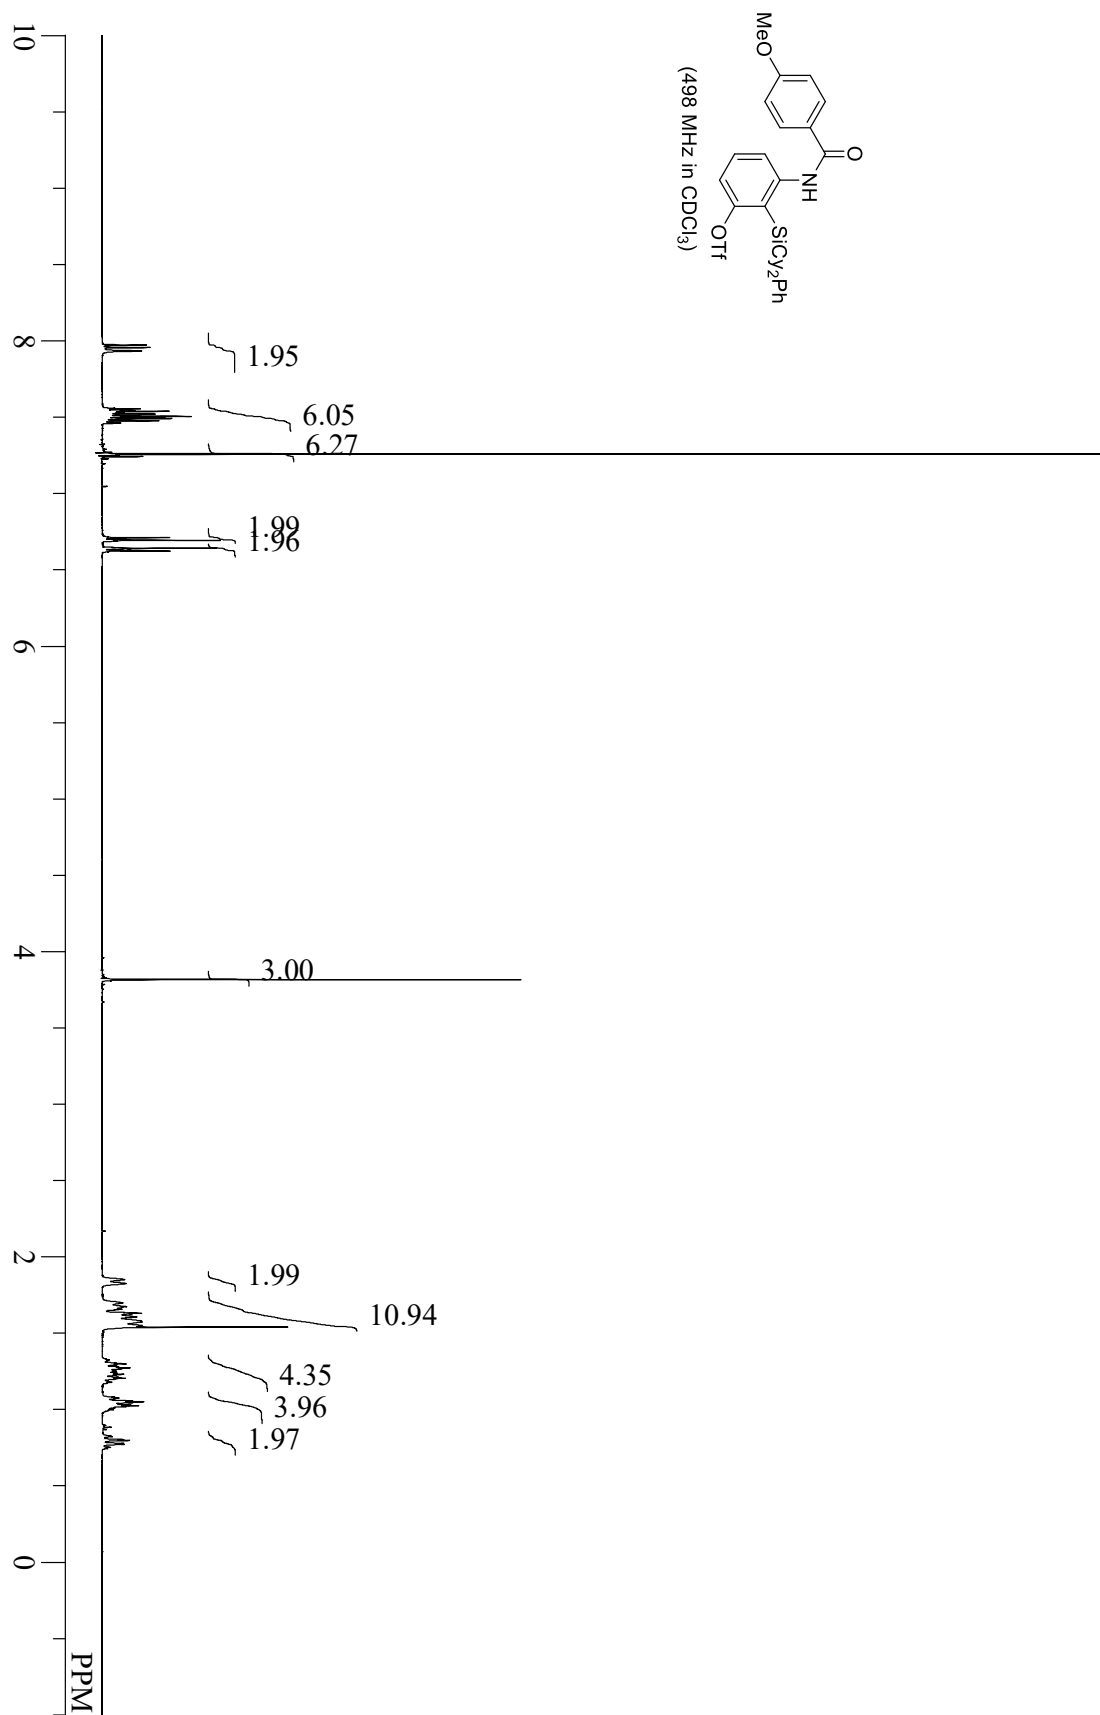

compound 1c

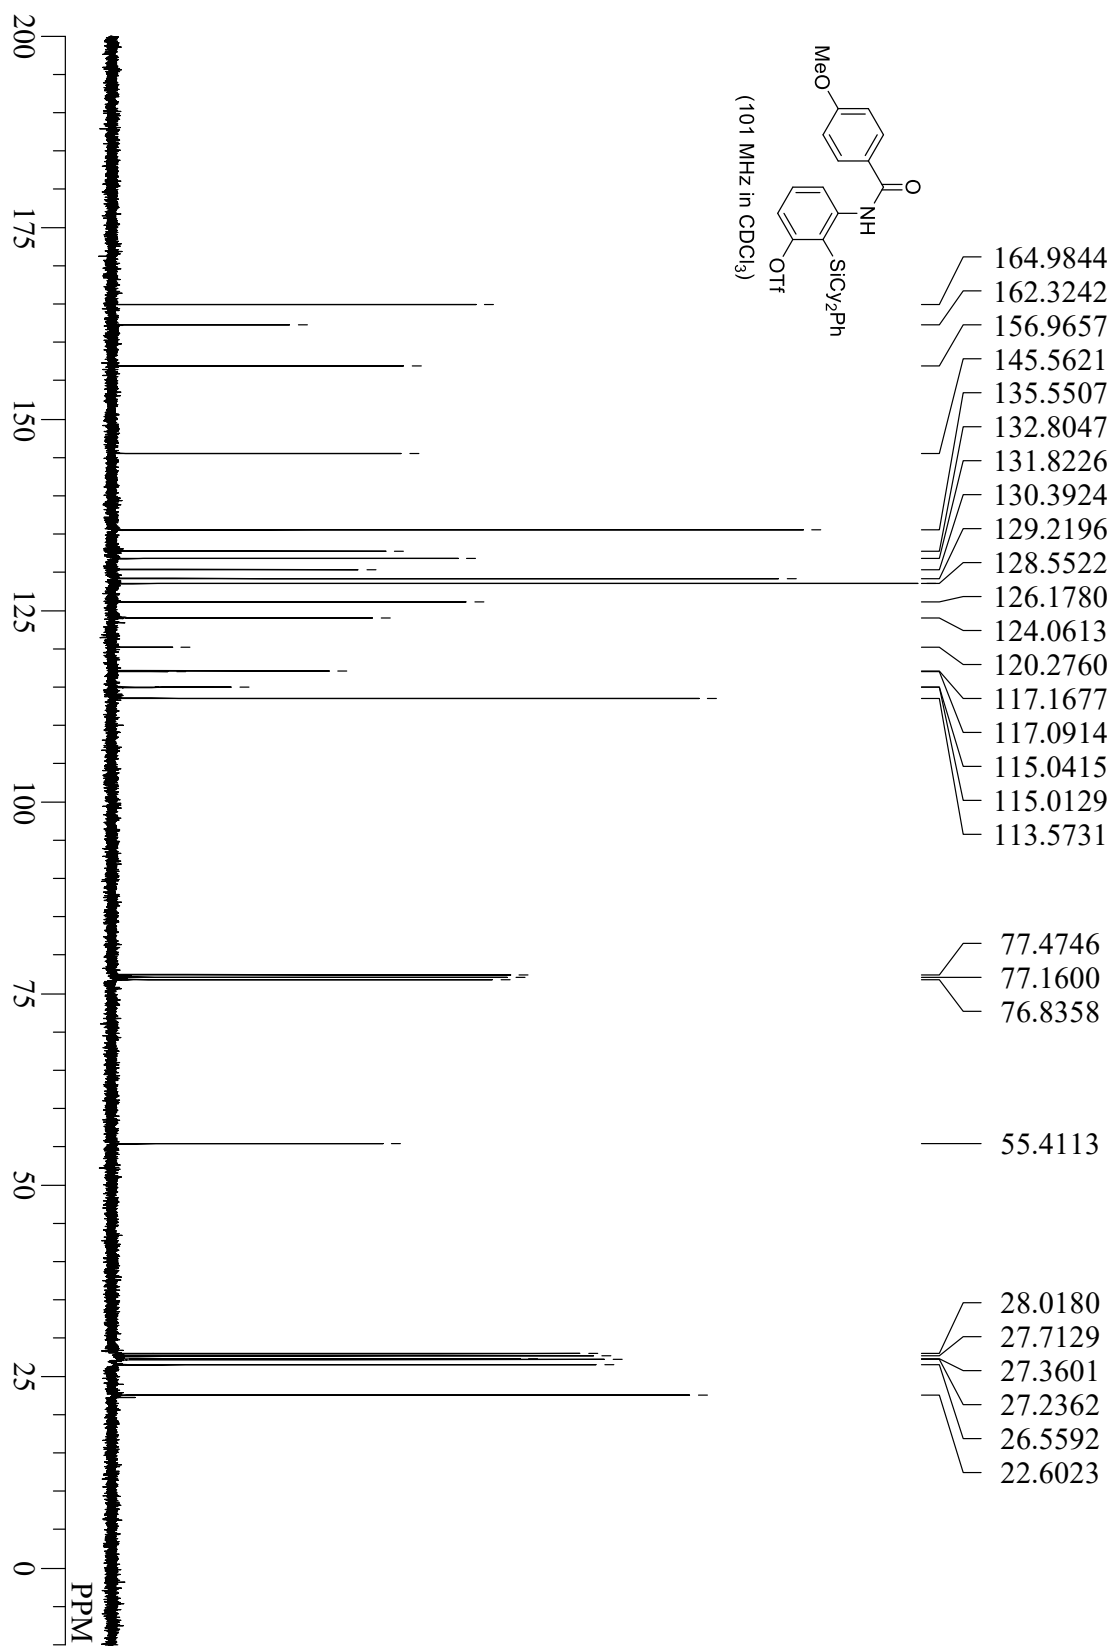

compound **1d**

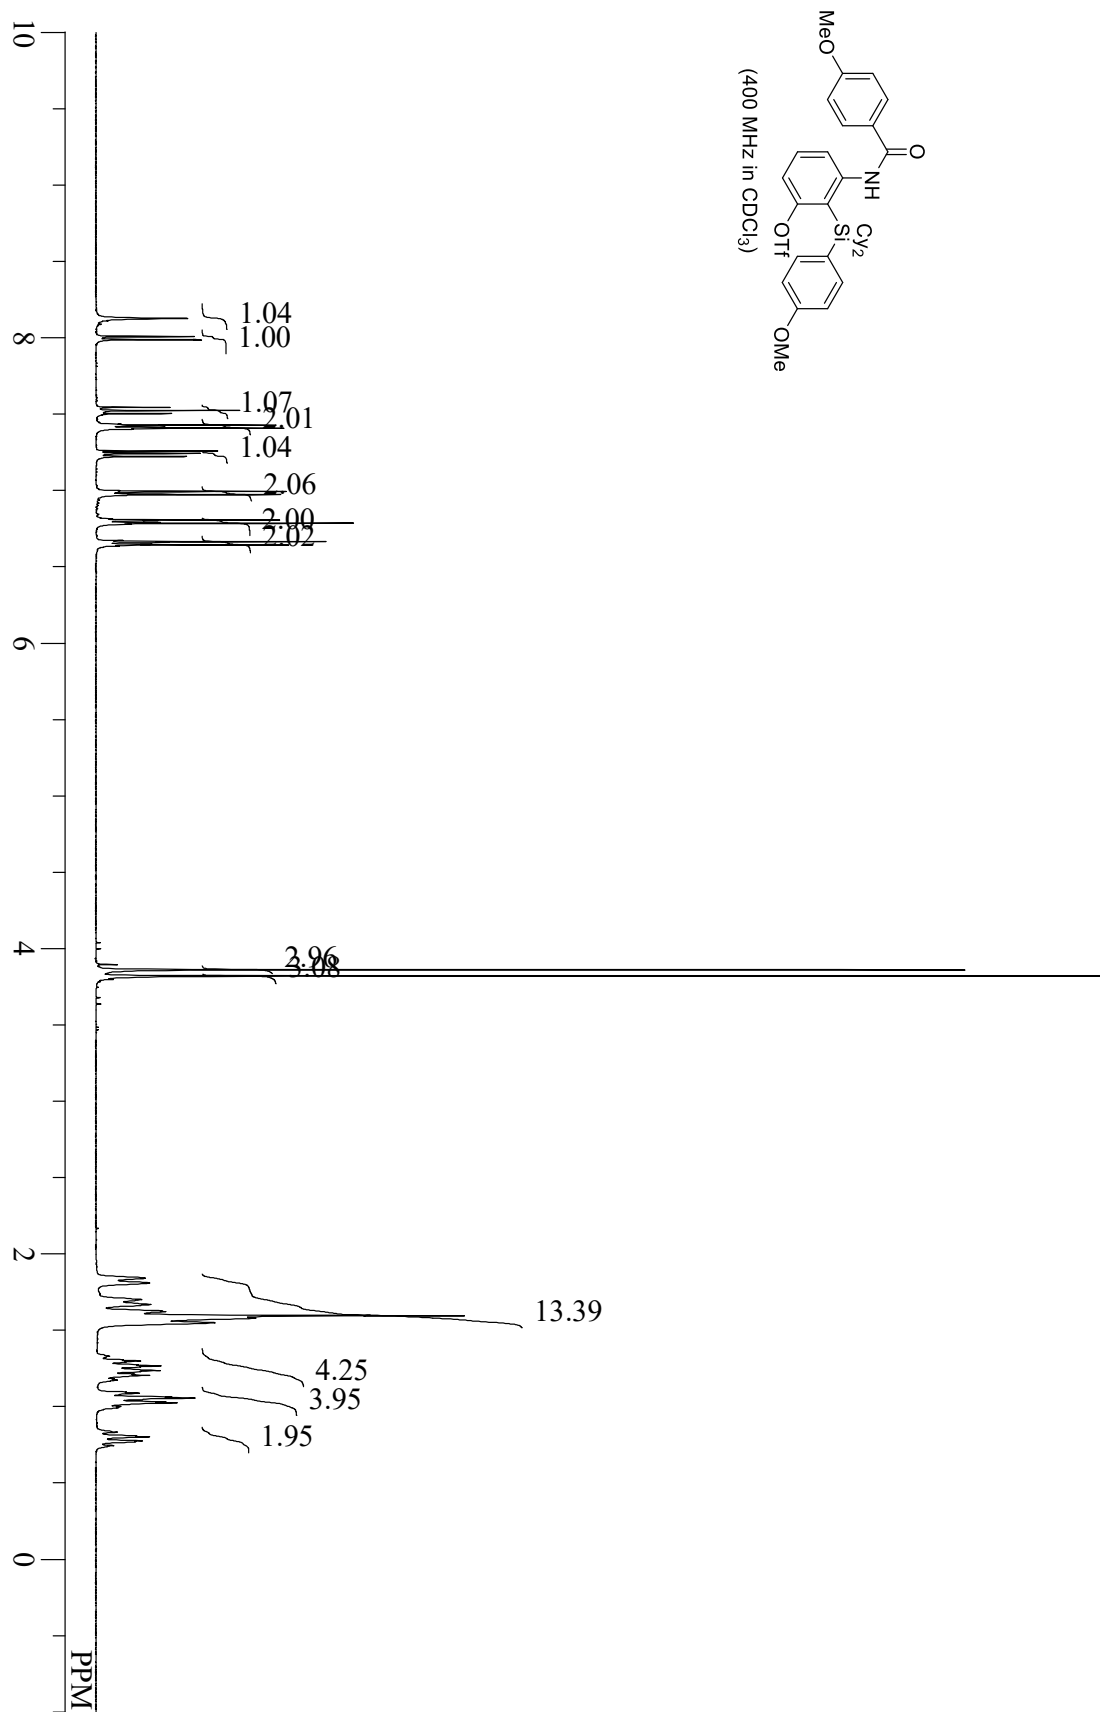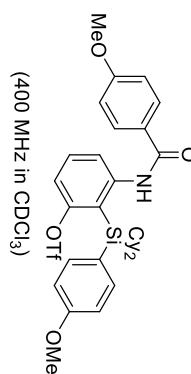

compound **1d**

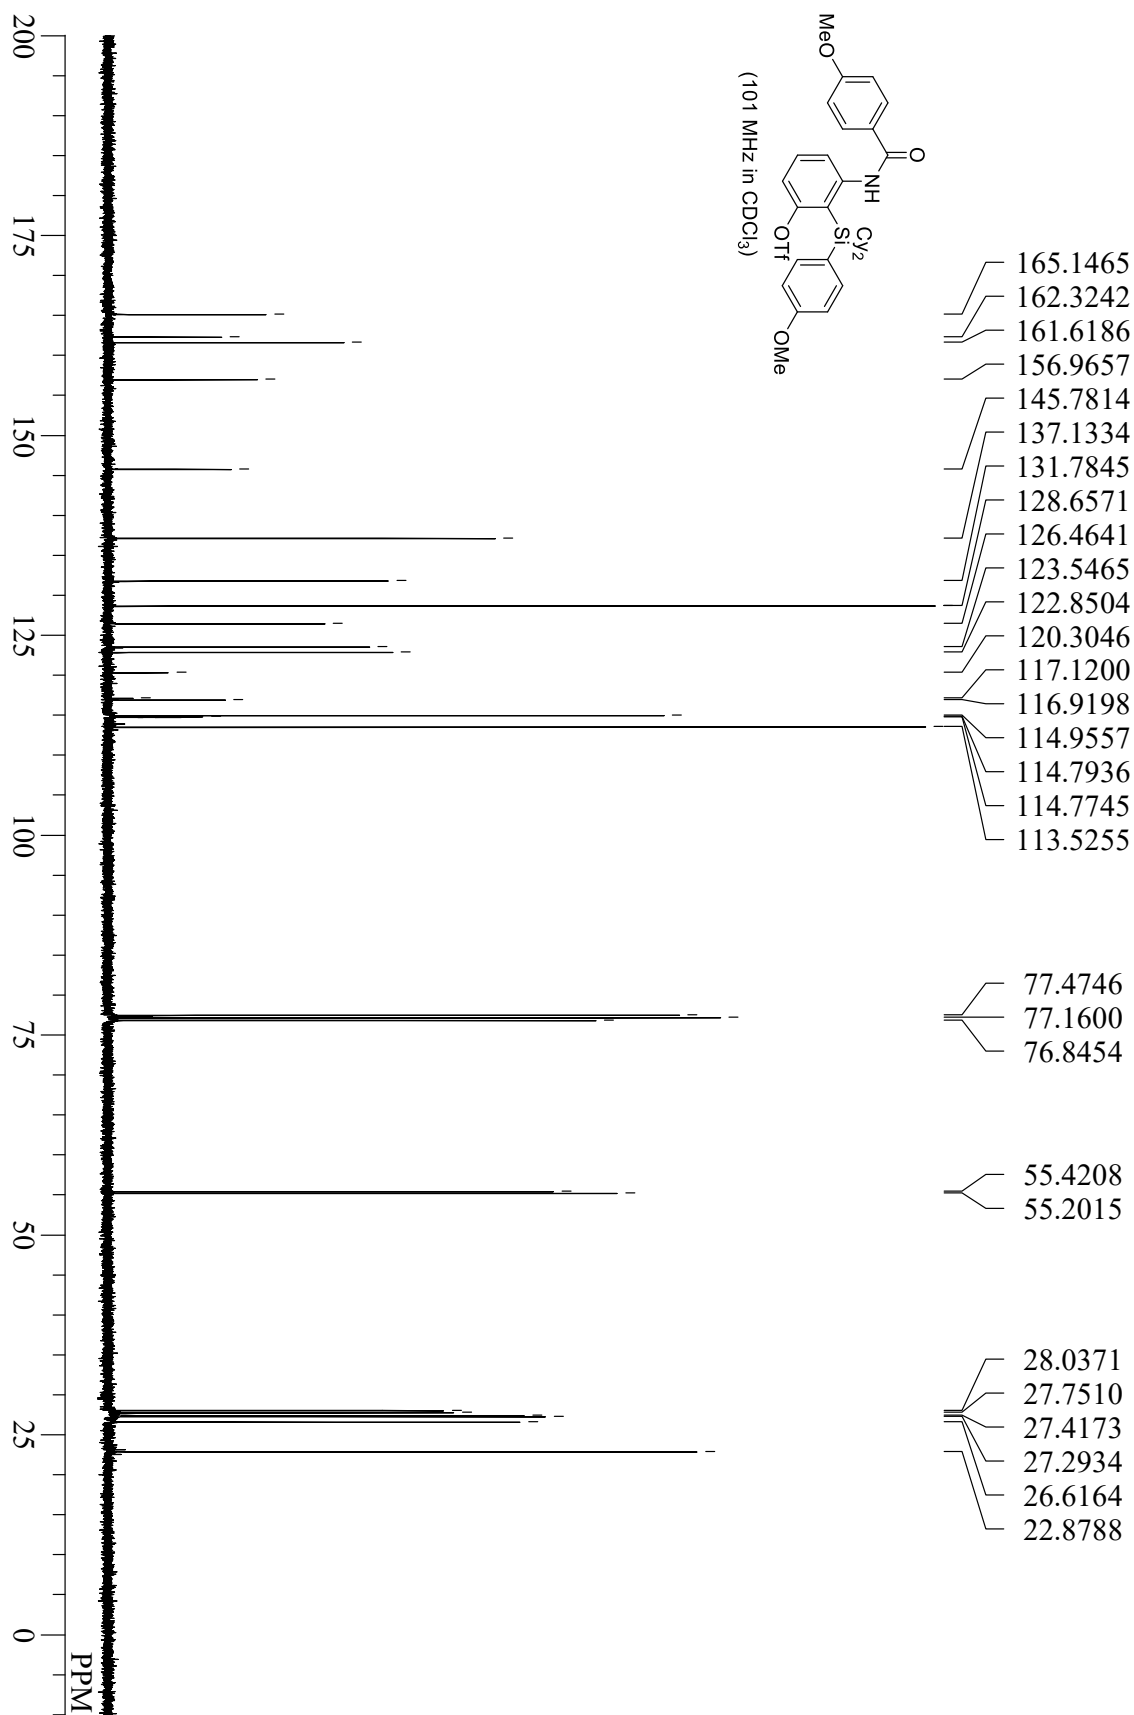

compound **1e**

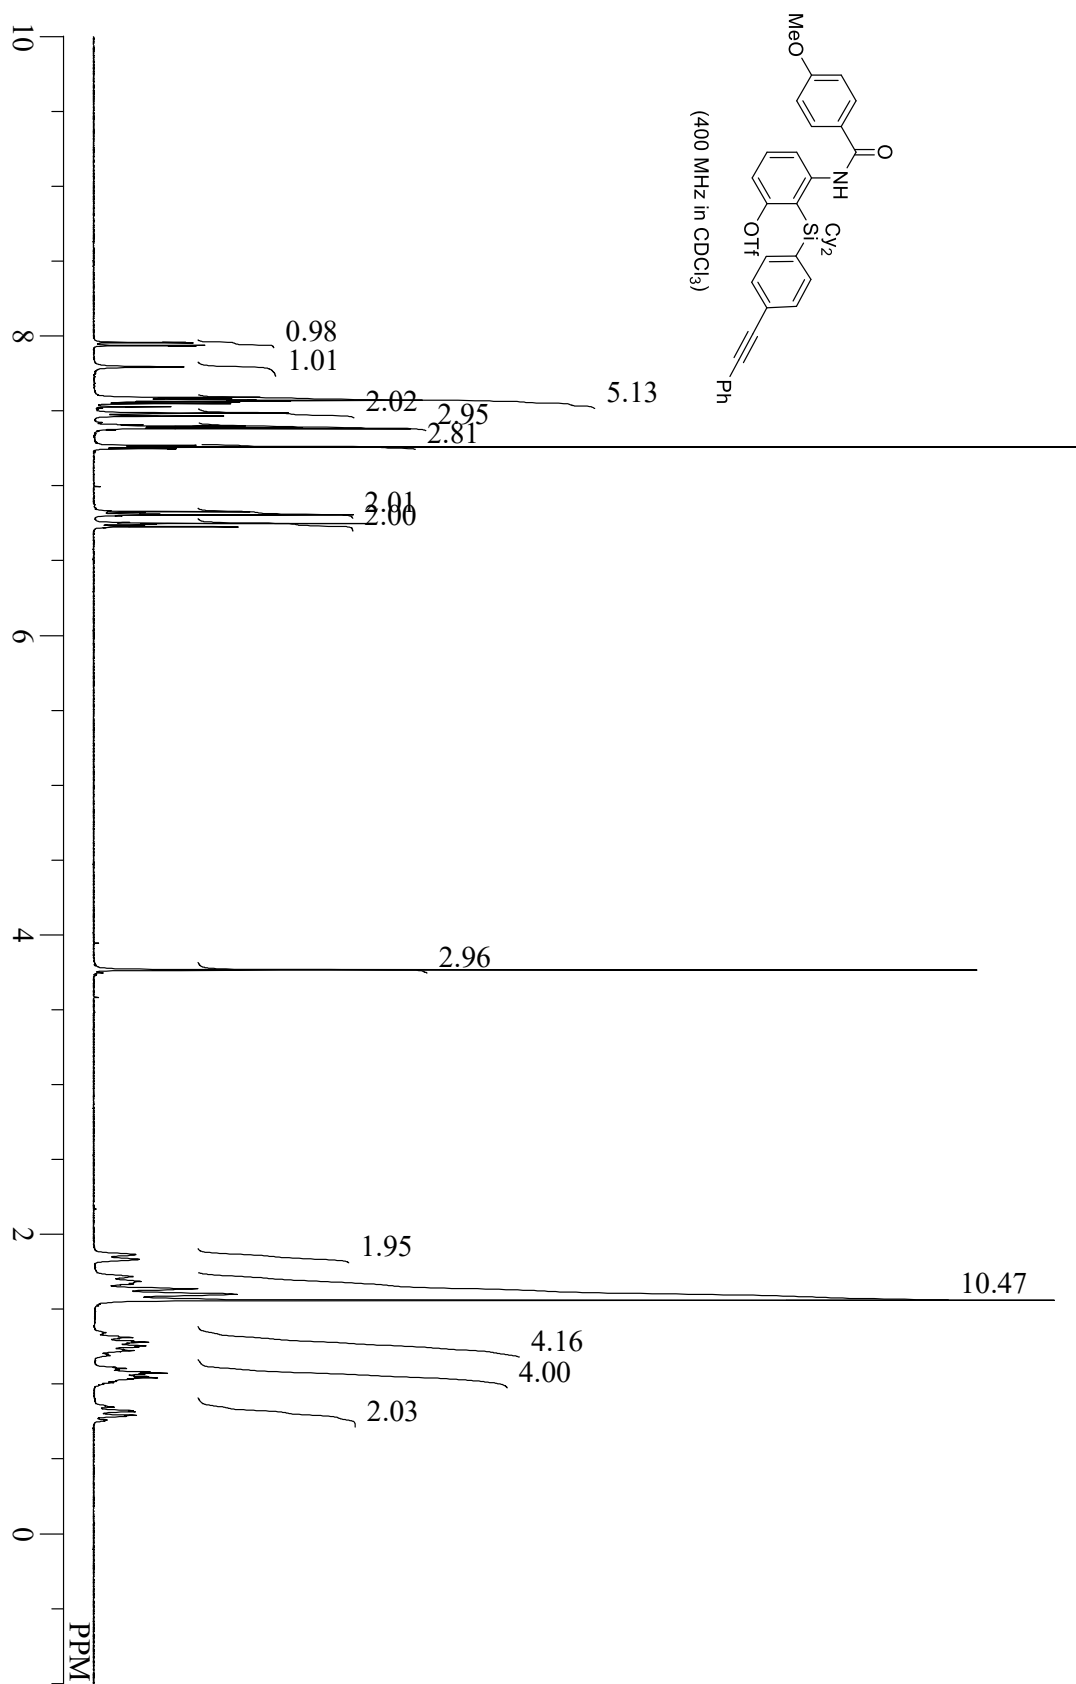

compound 1e

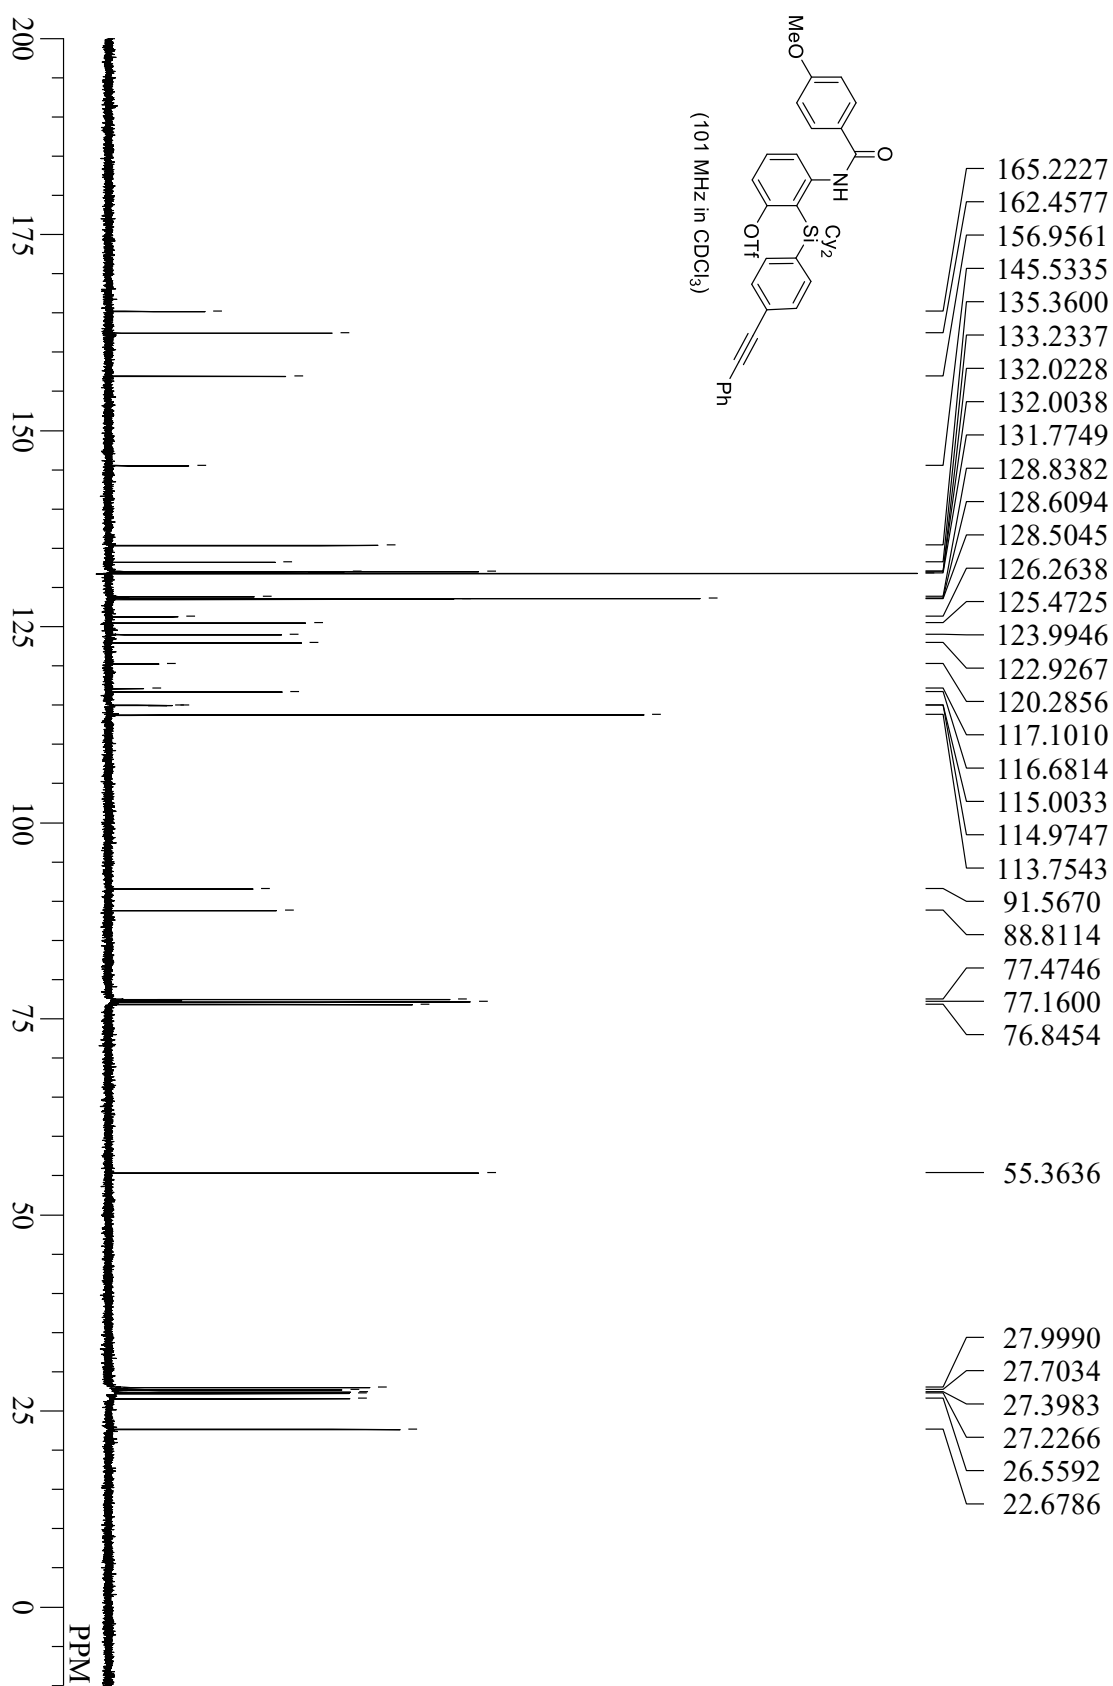

compound 1f

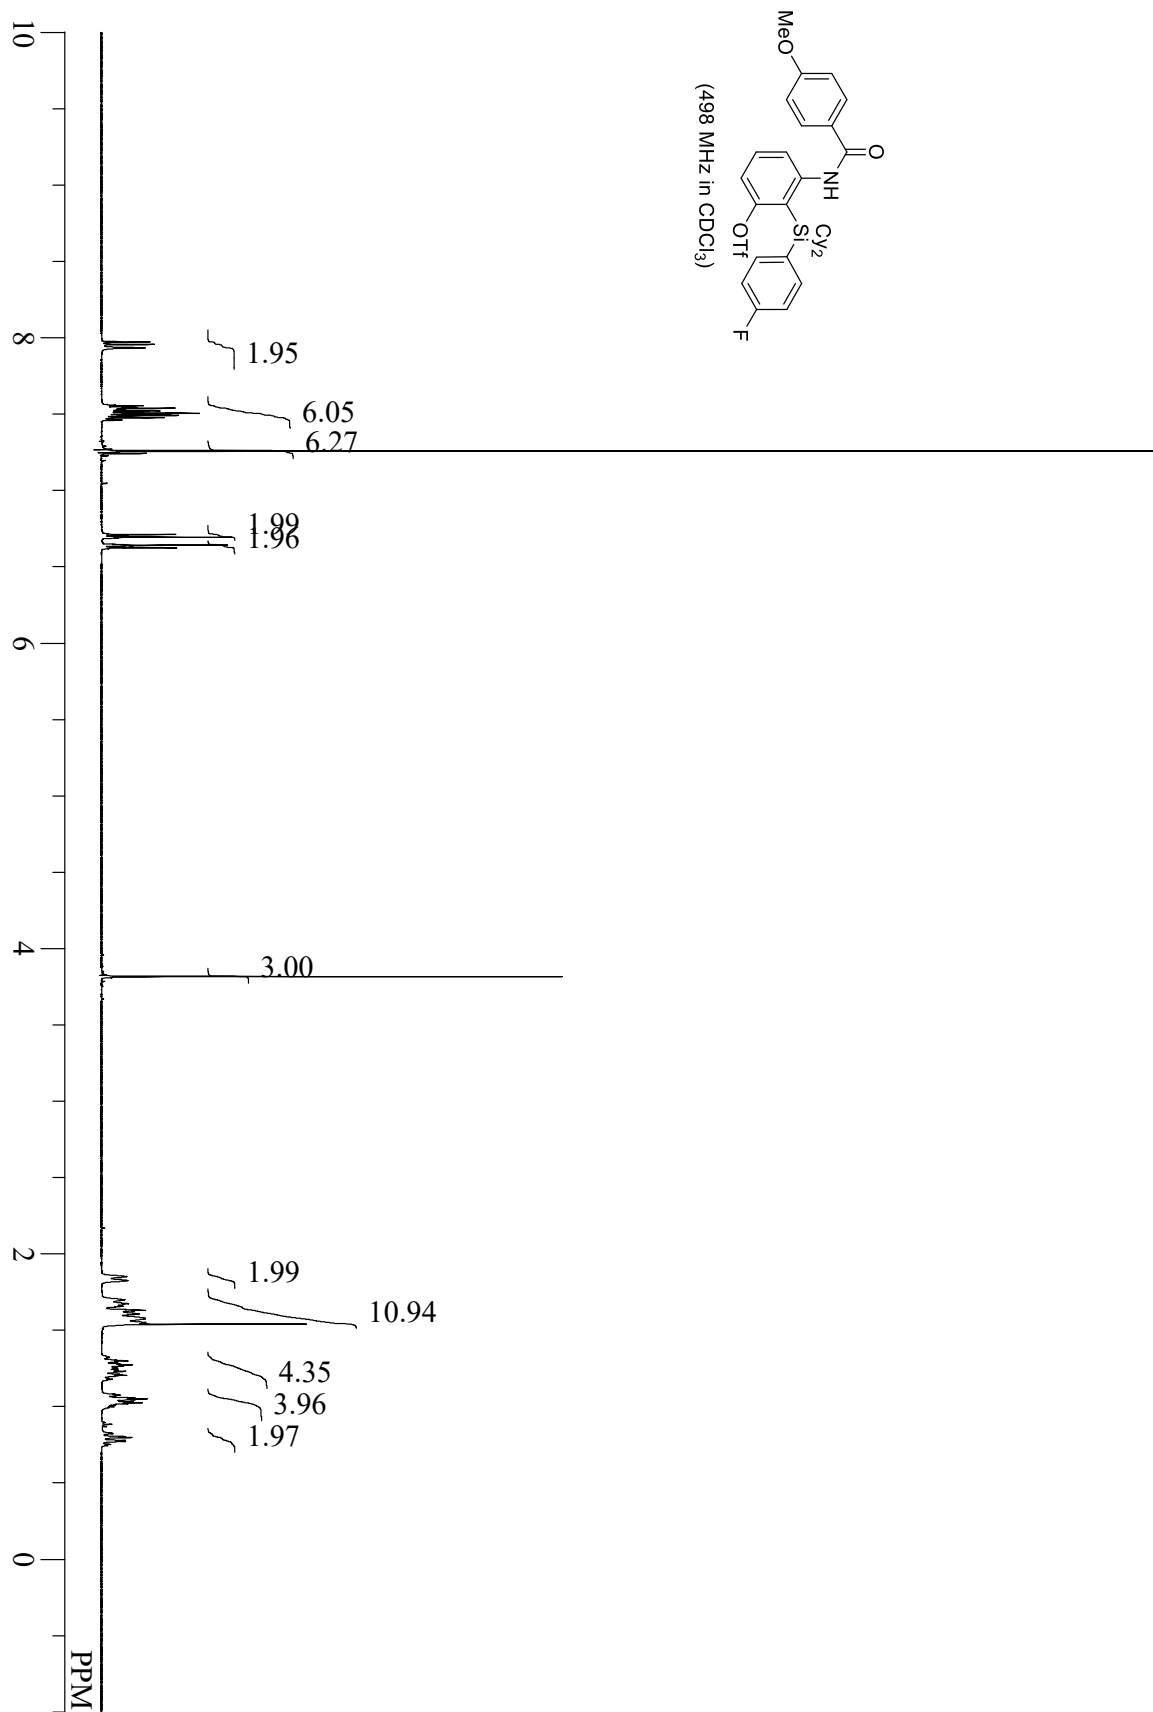

compound 1f

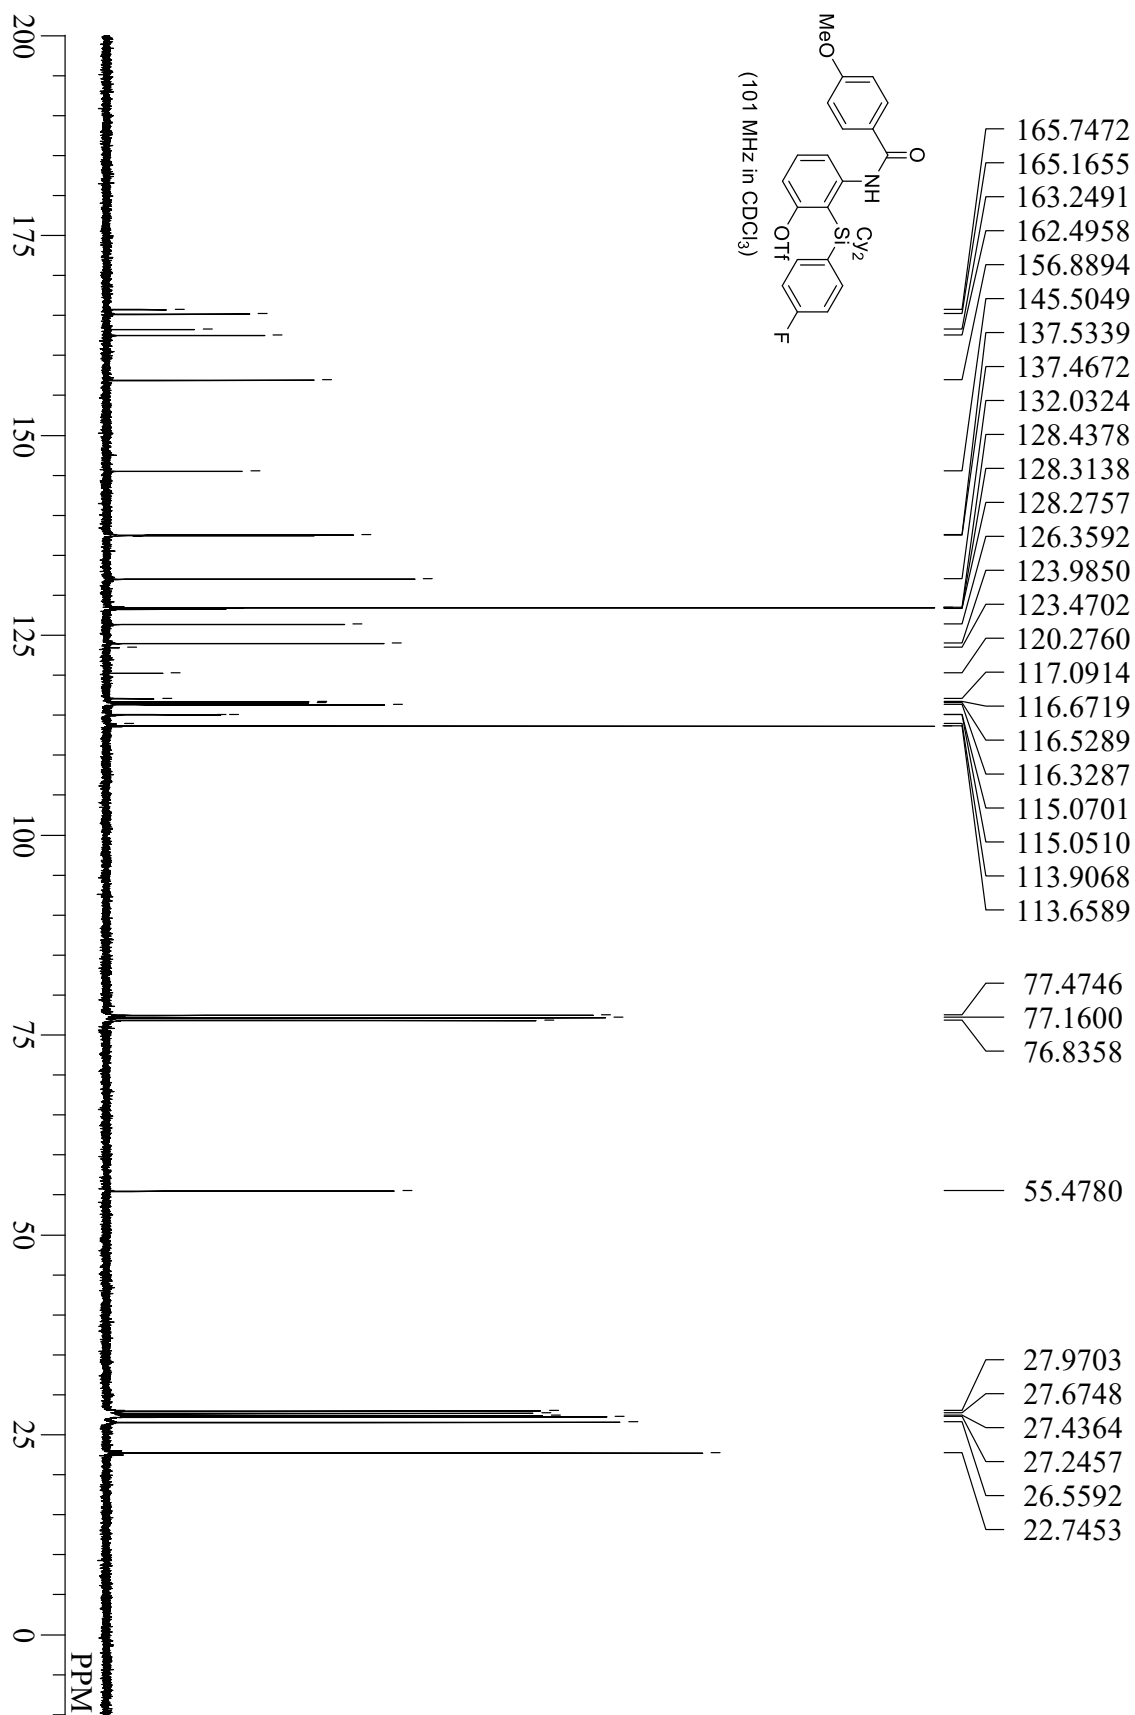



compound **1g**

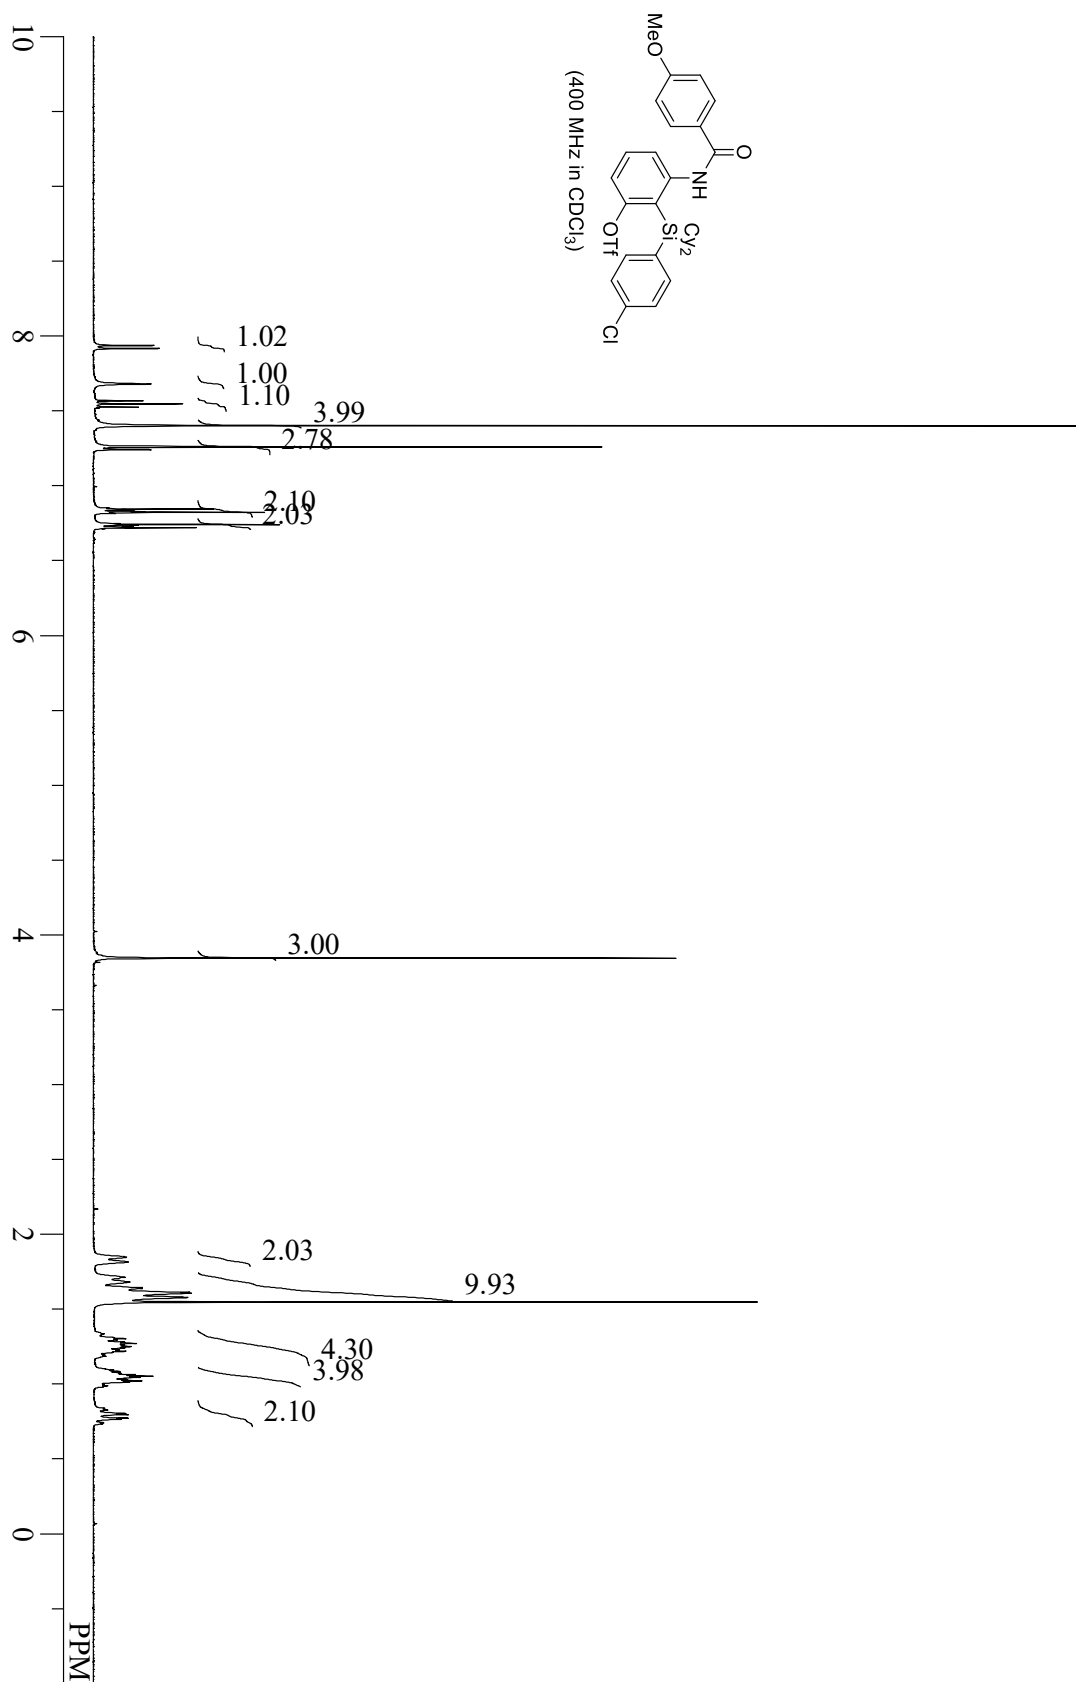

compound **1g**

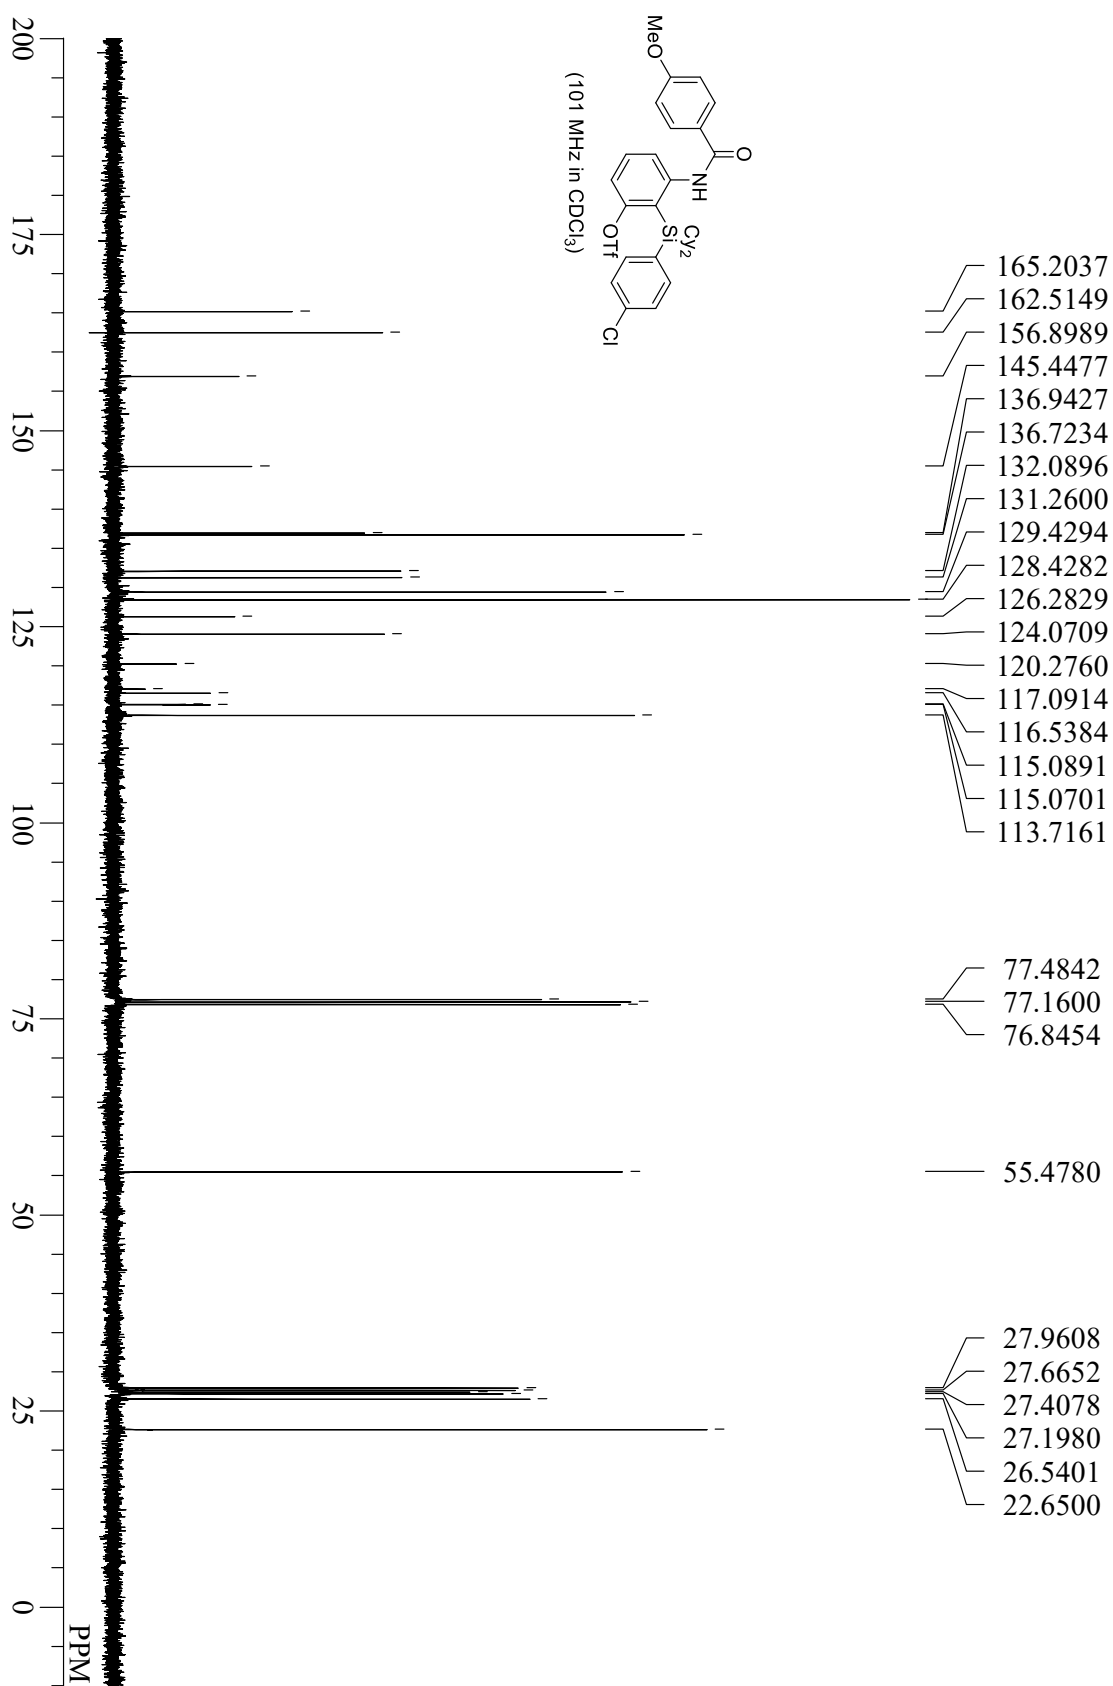

compound **1h**

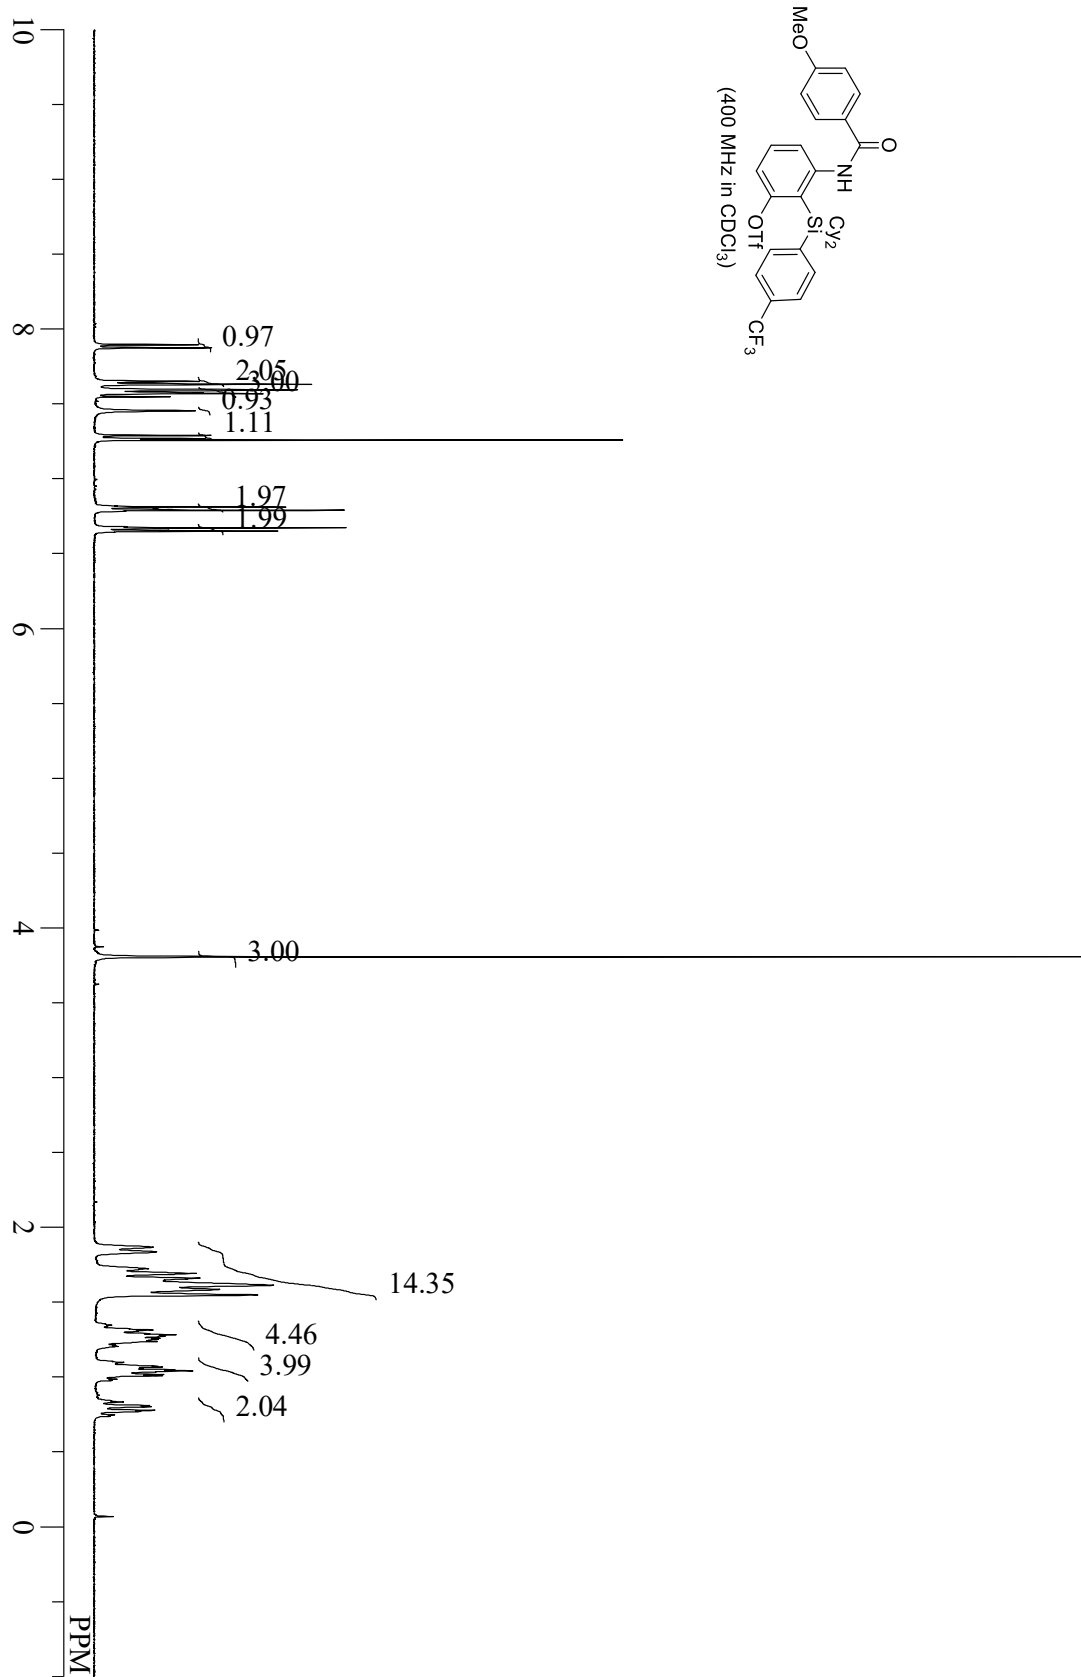

compound 1h

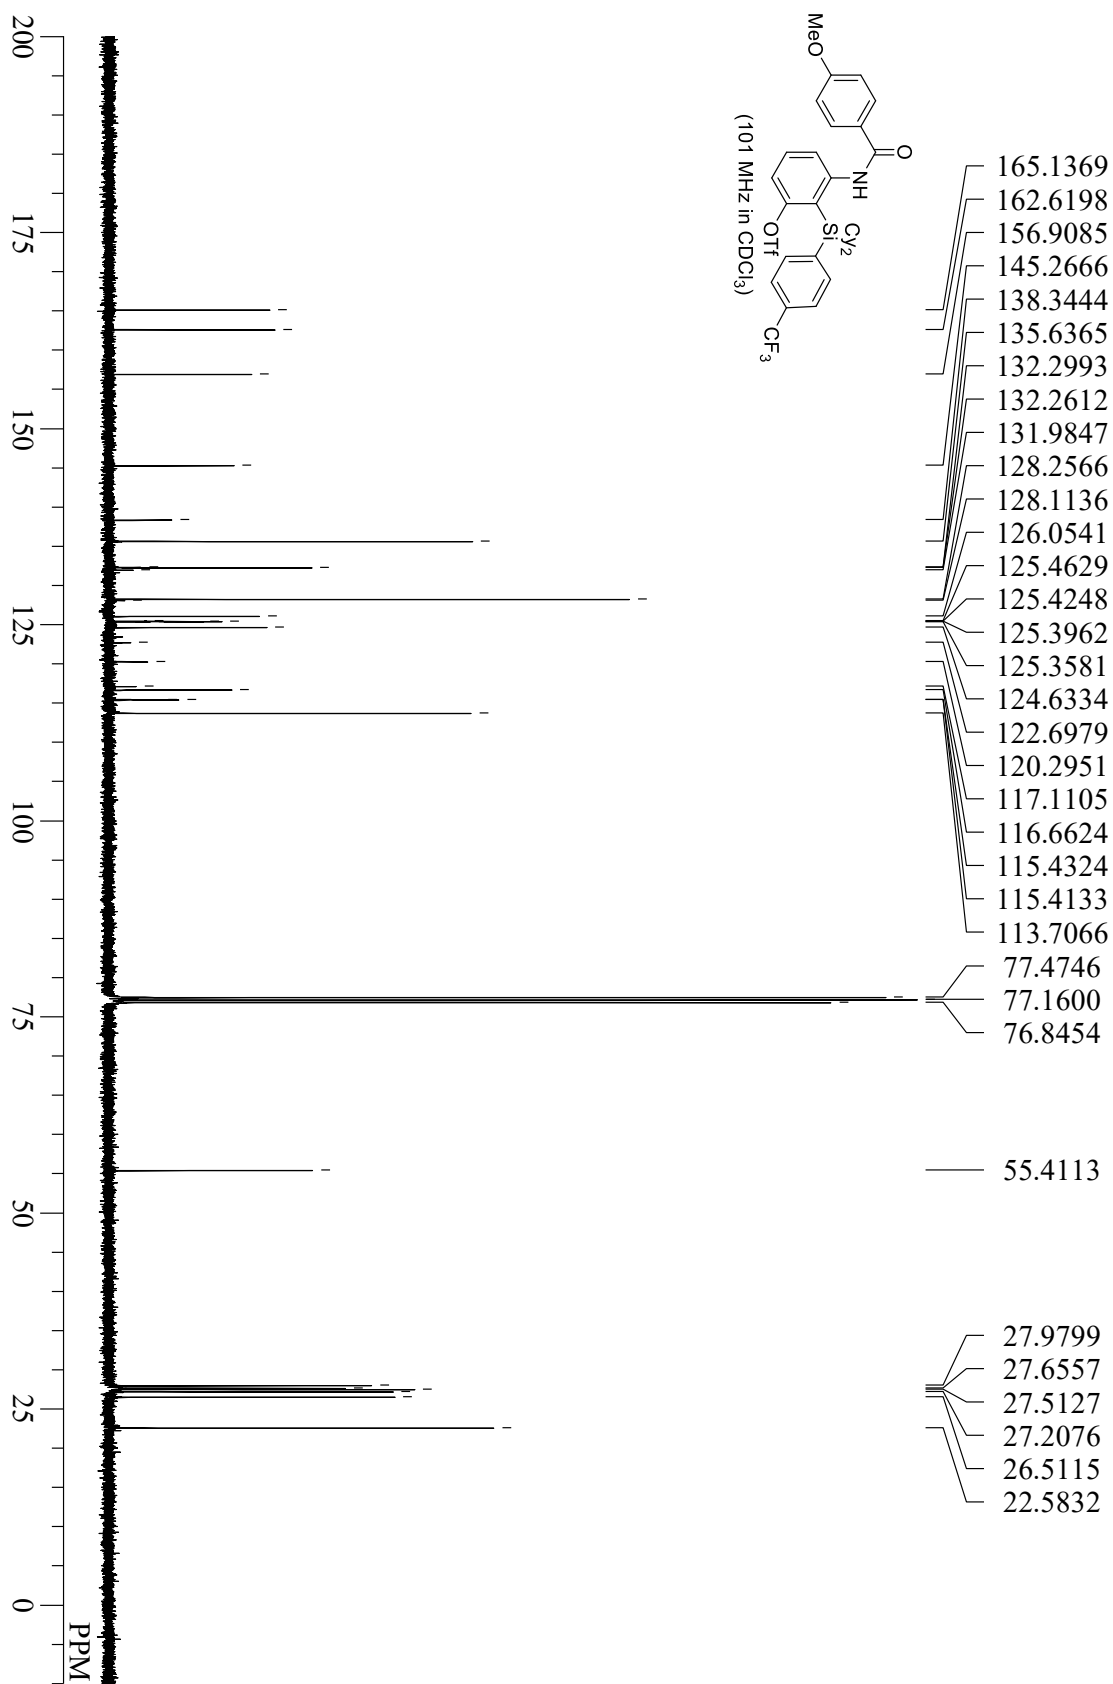

compound **1i**

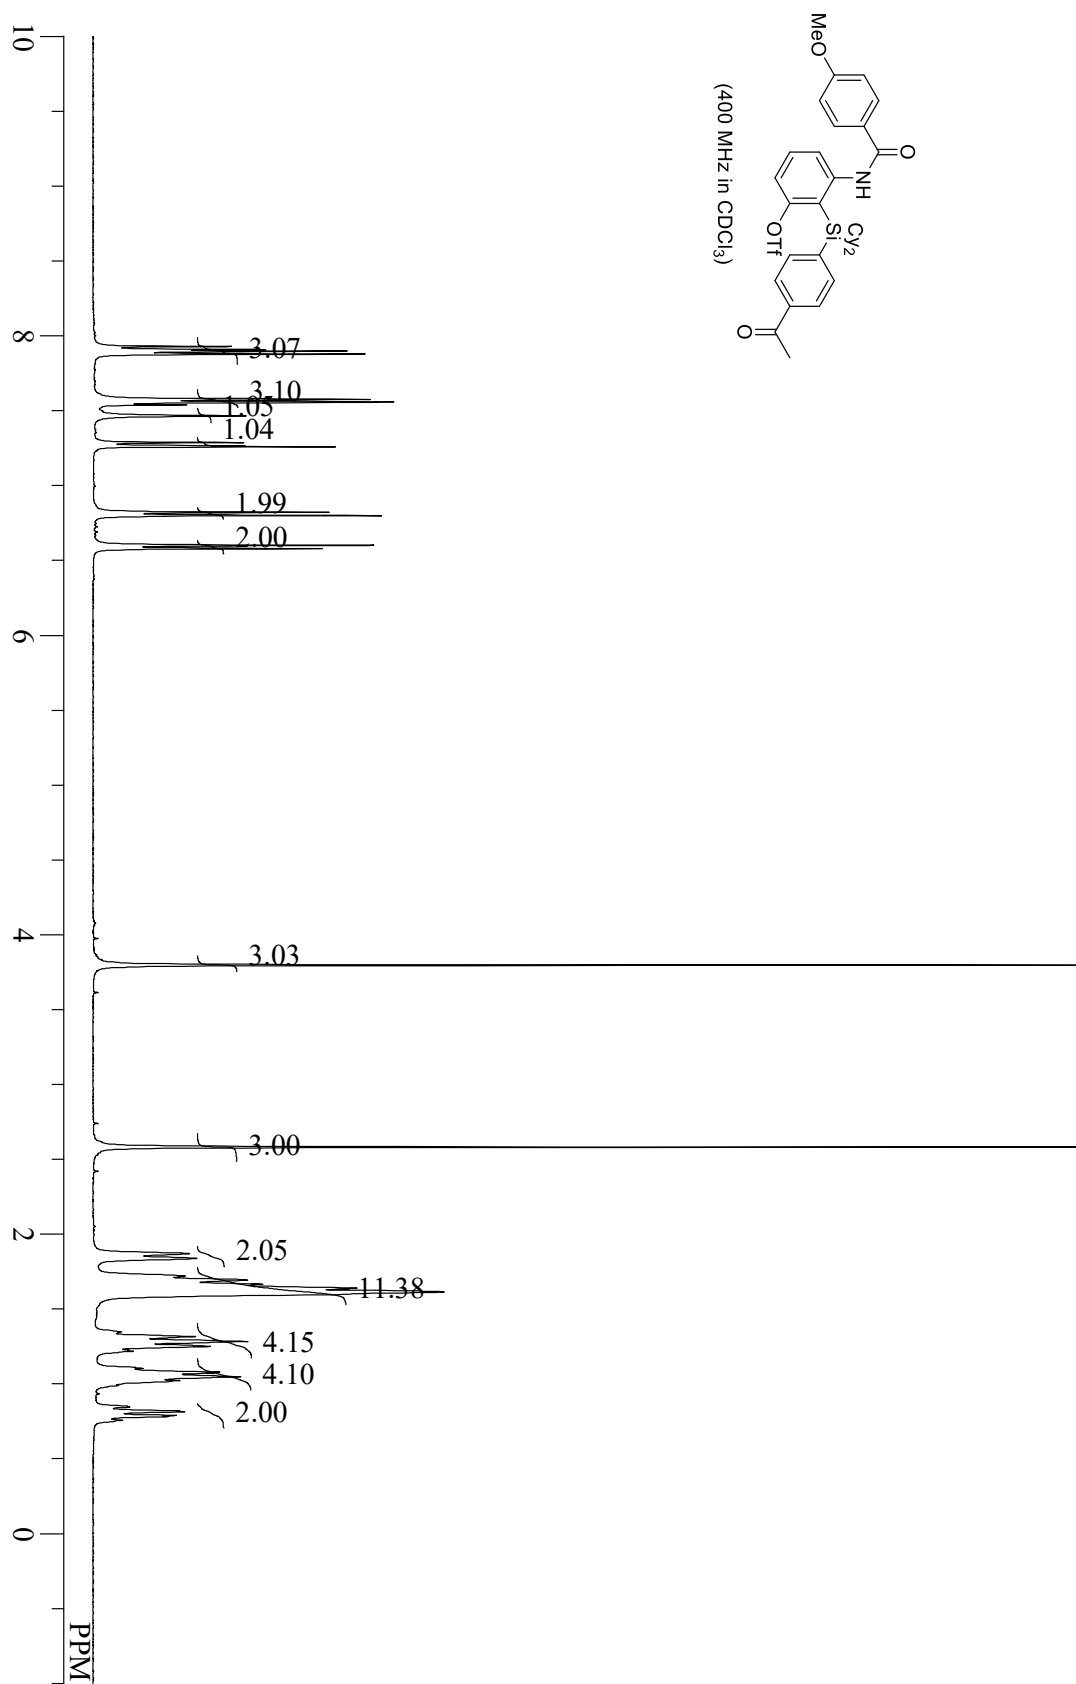

compound **1i**

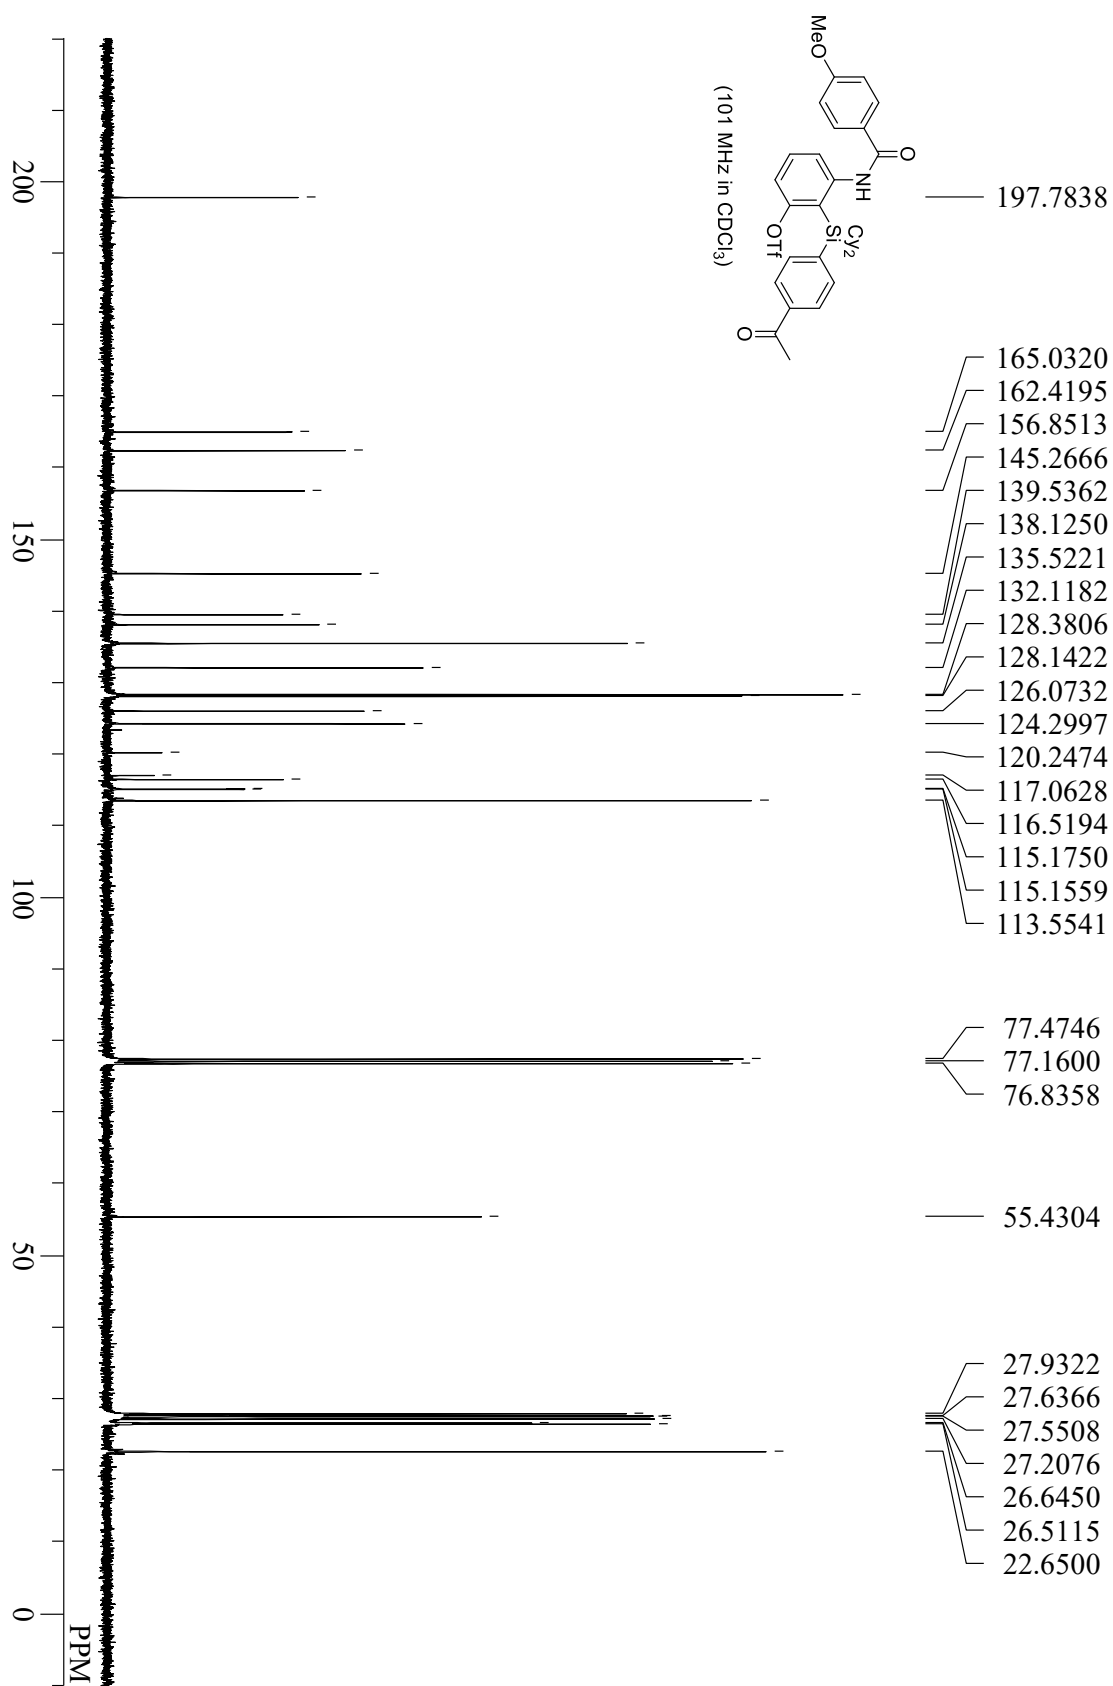

compound **1j**

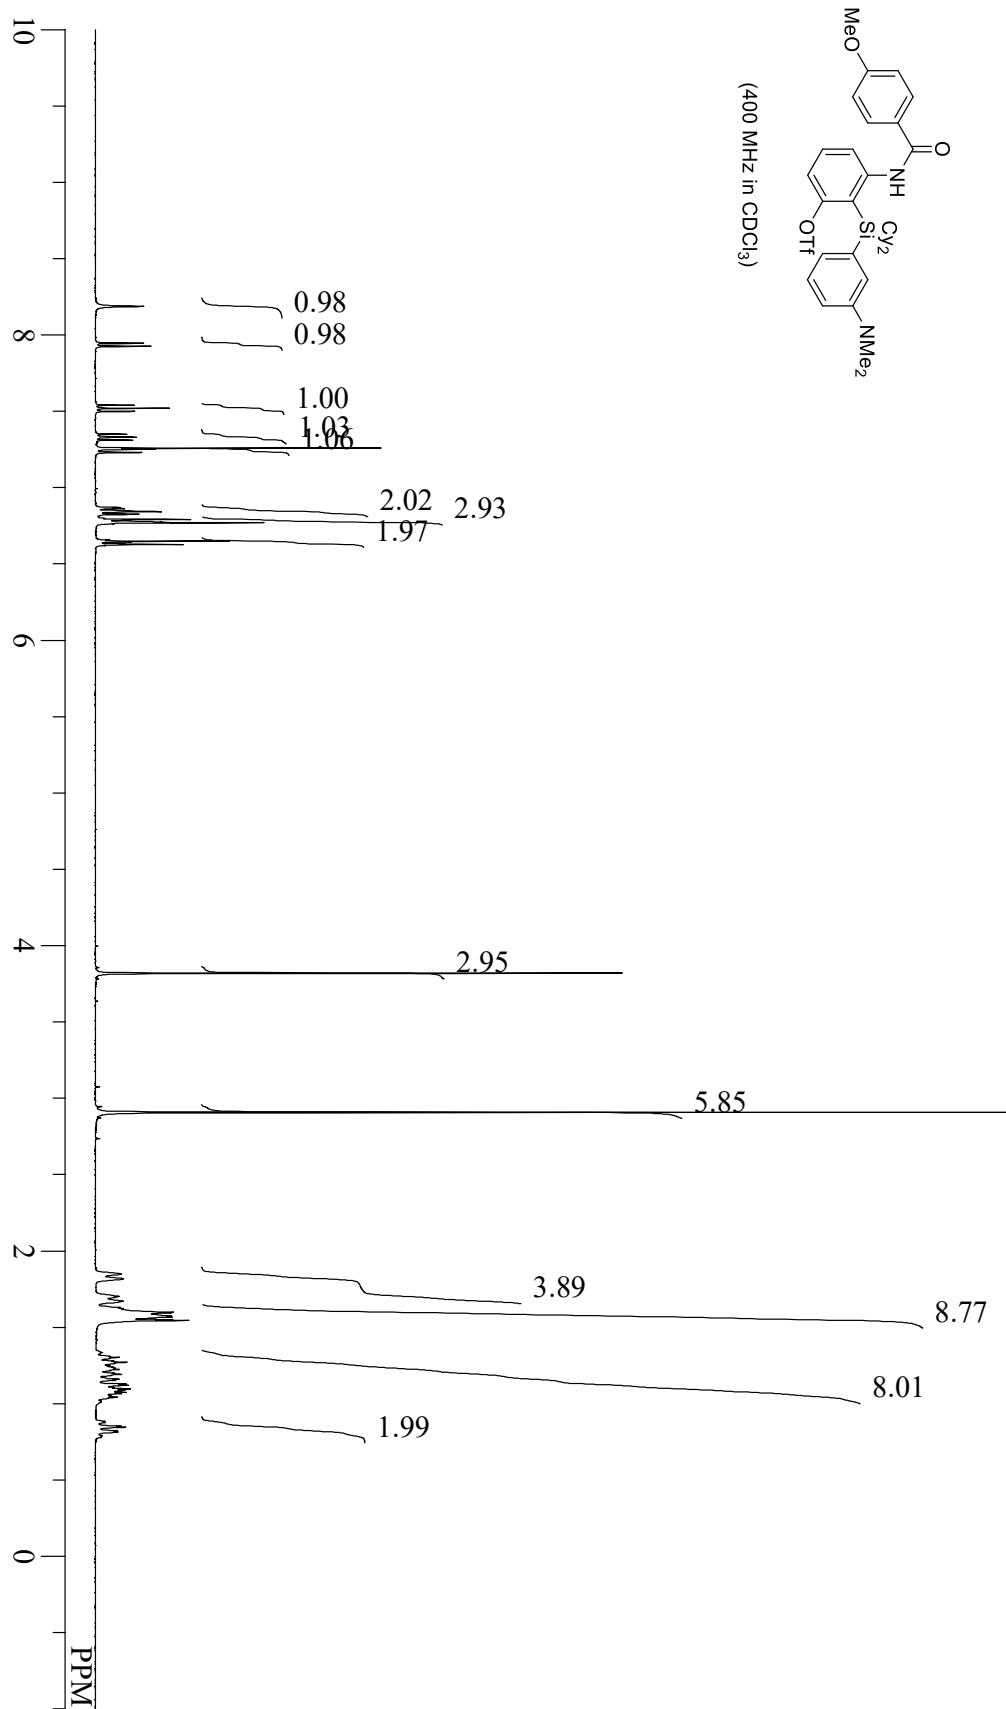

compound 1j

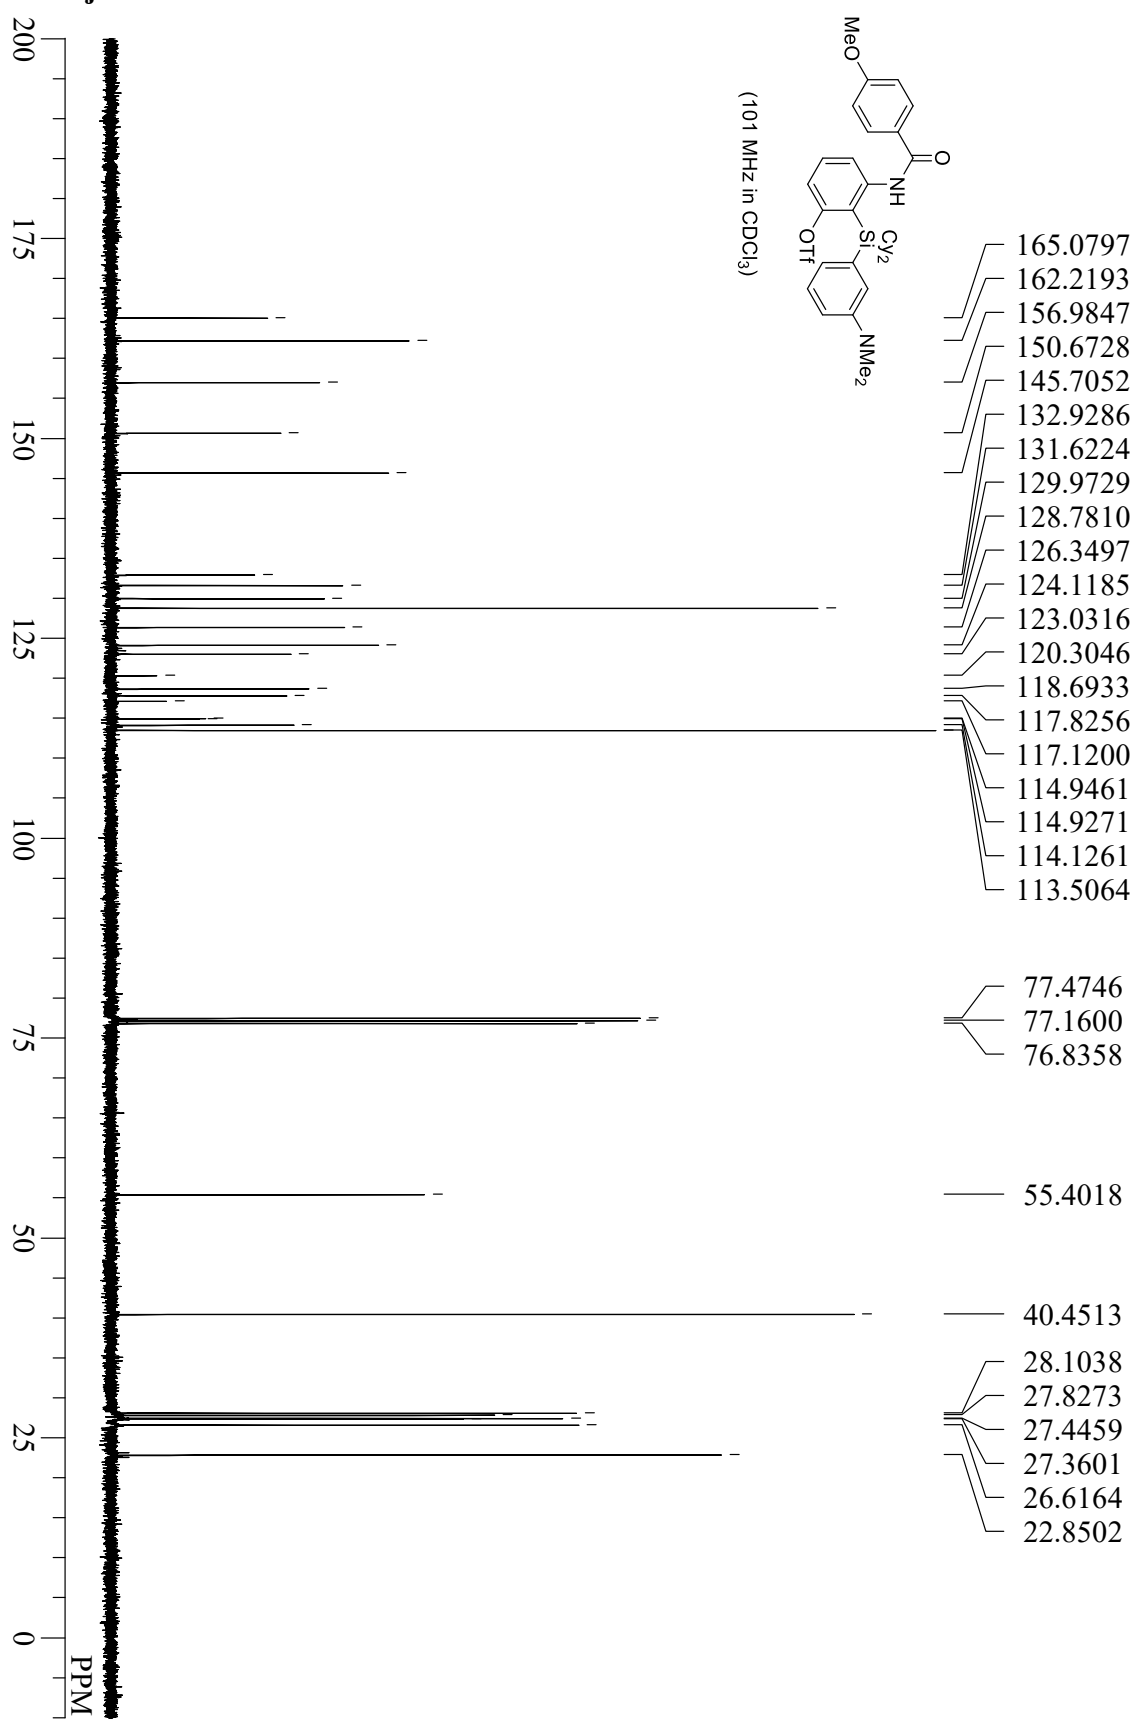



compound **1k**

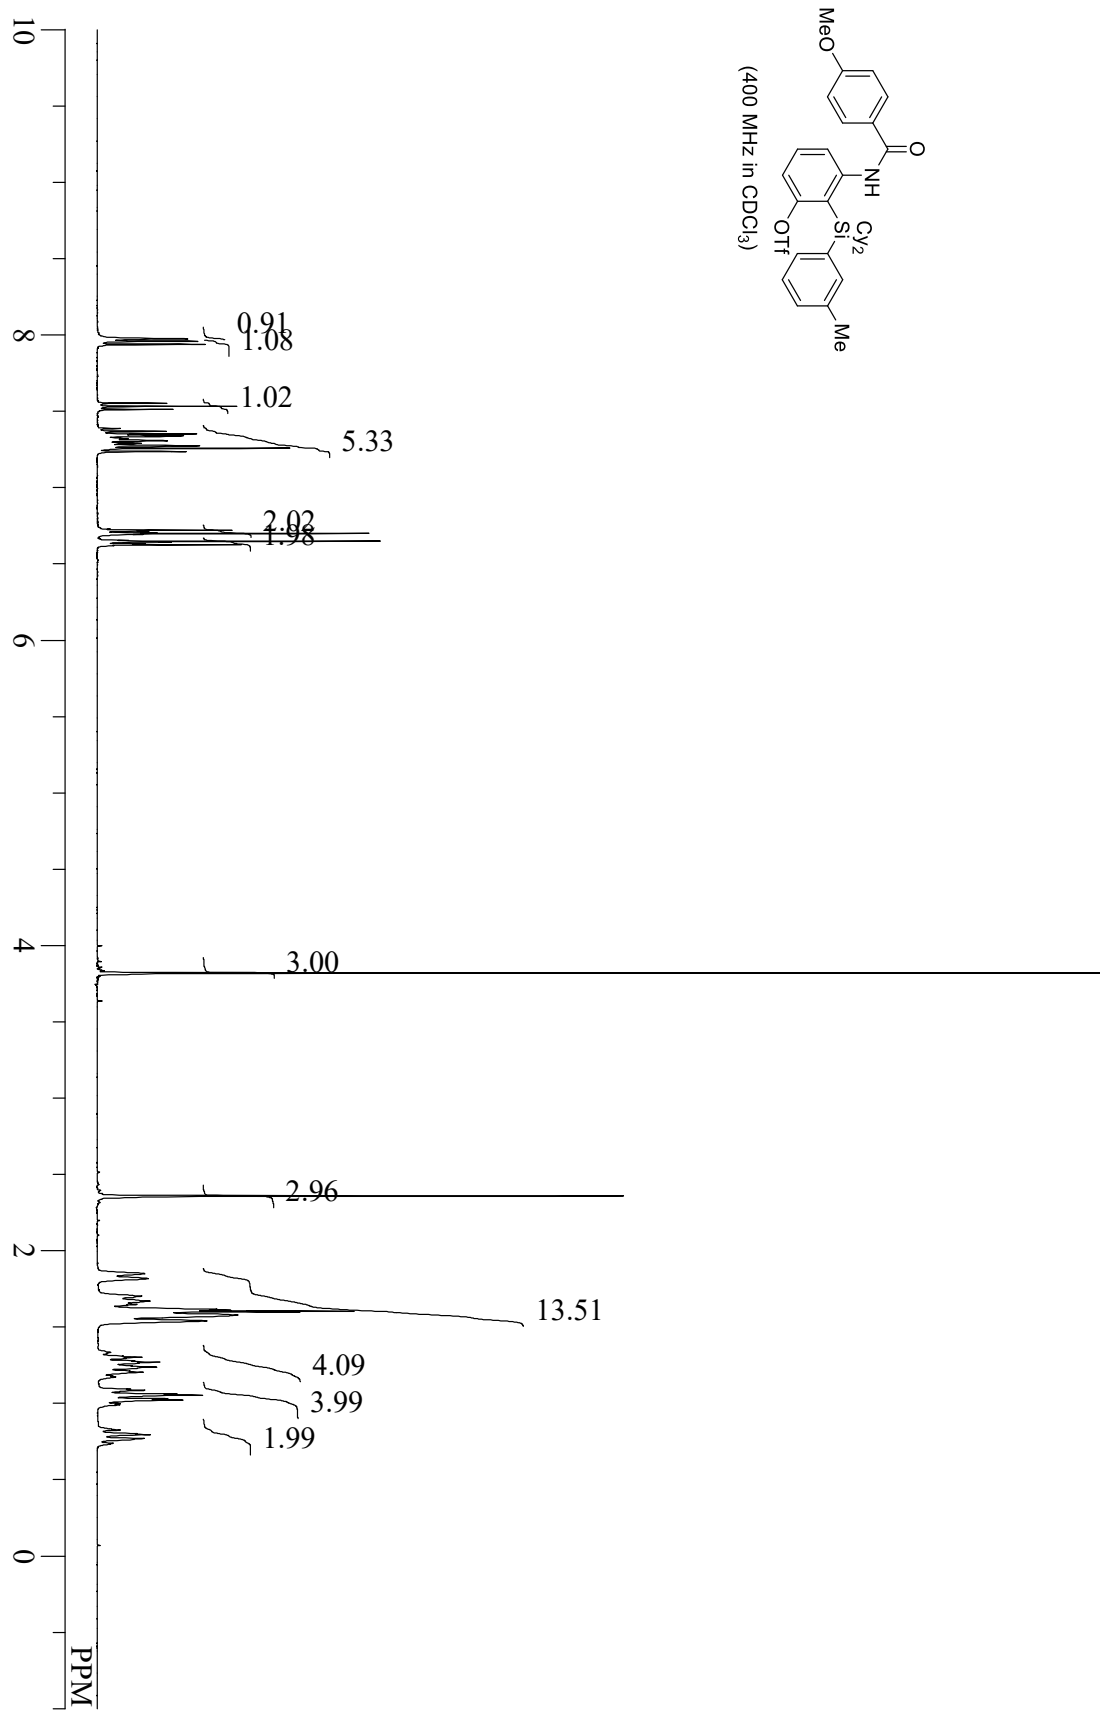

compound 1k

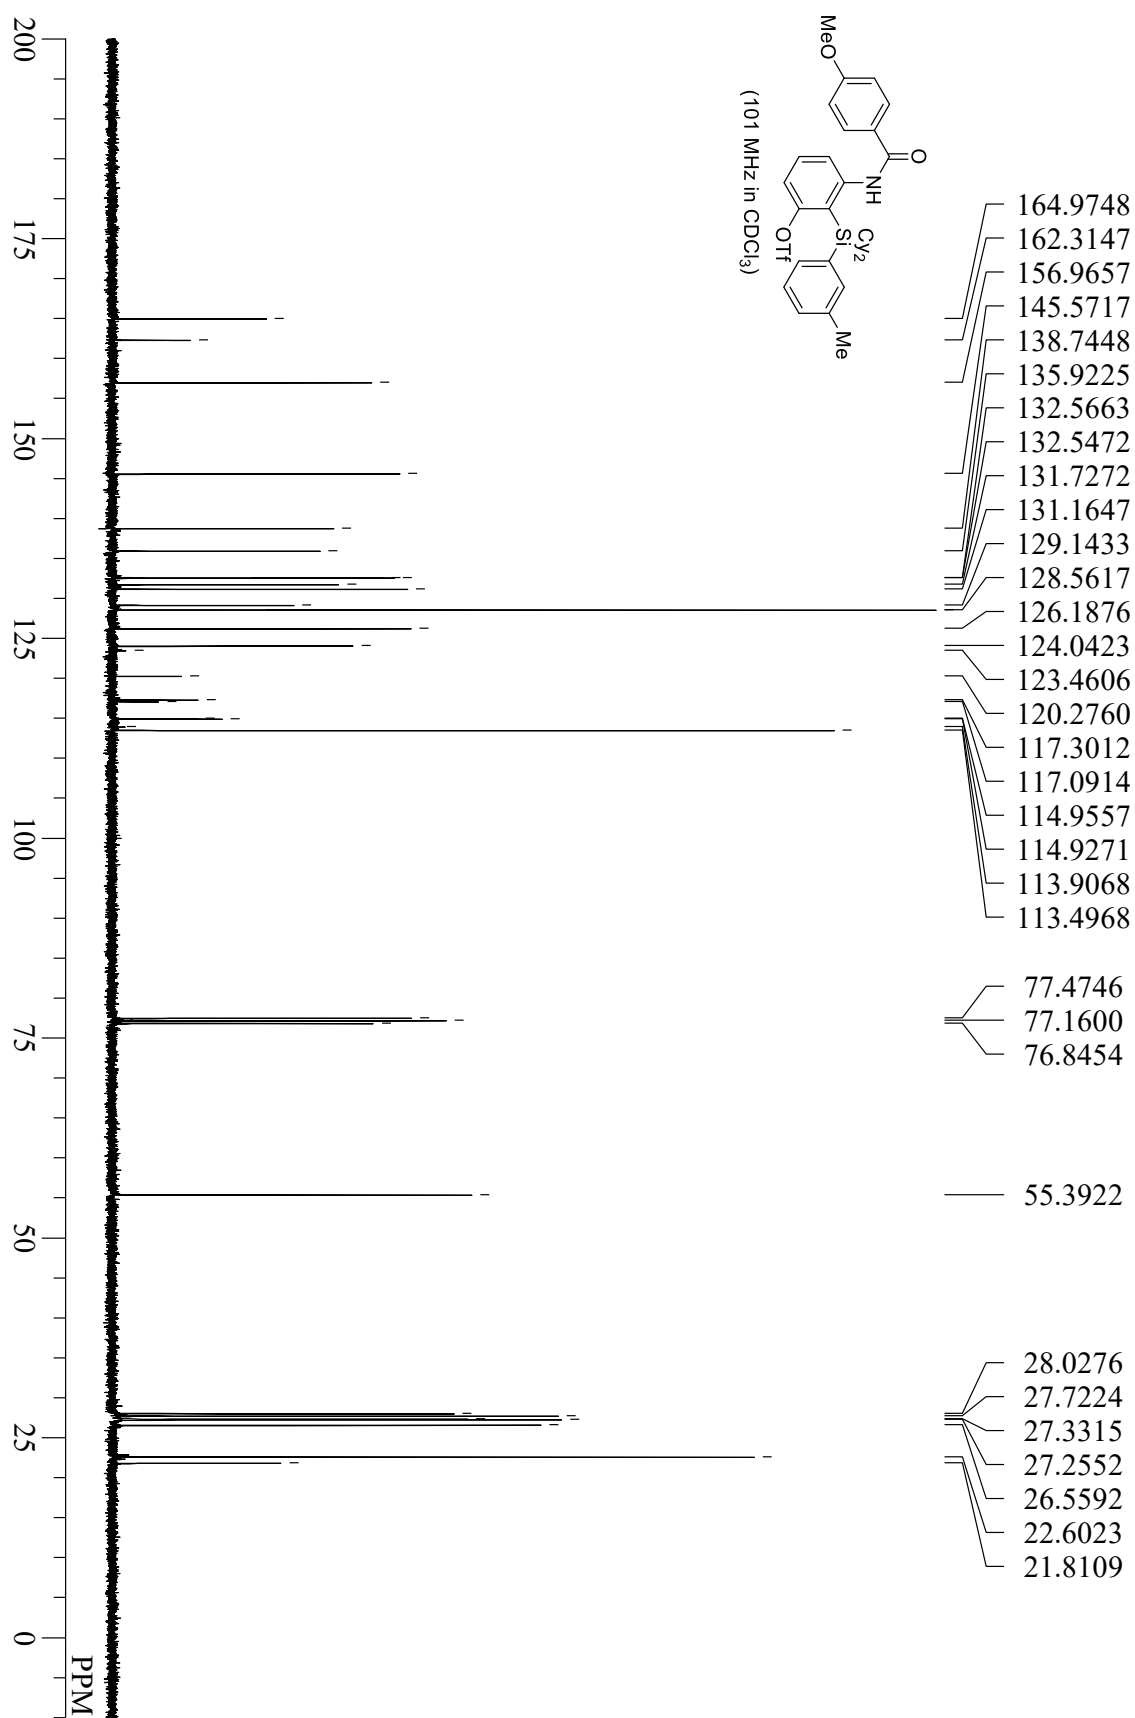

compound **11**

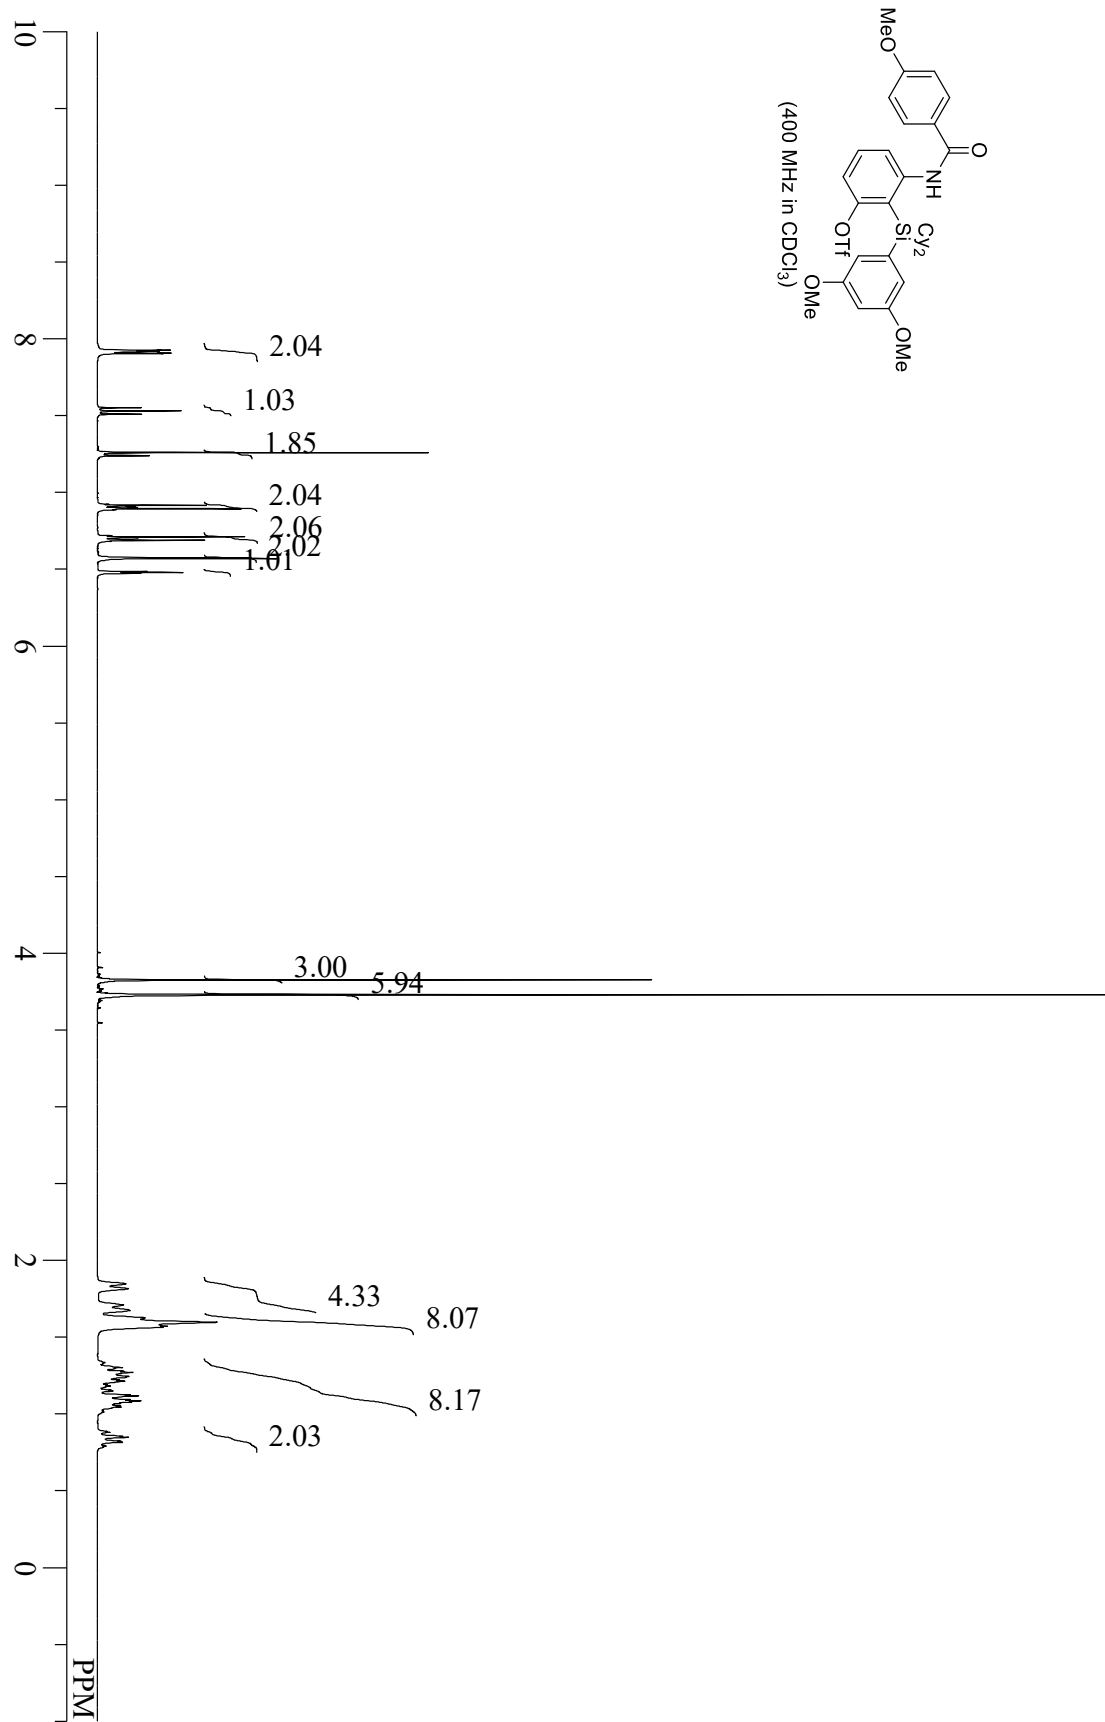

compound 11

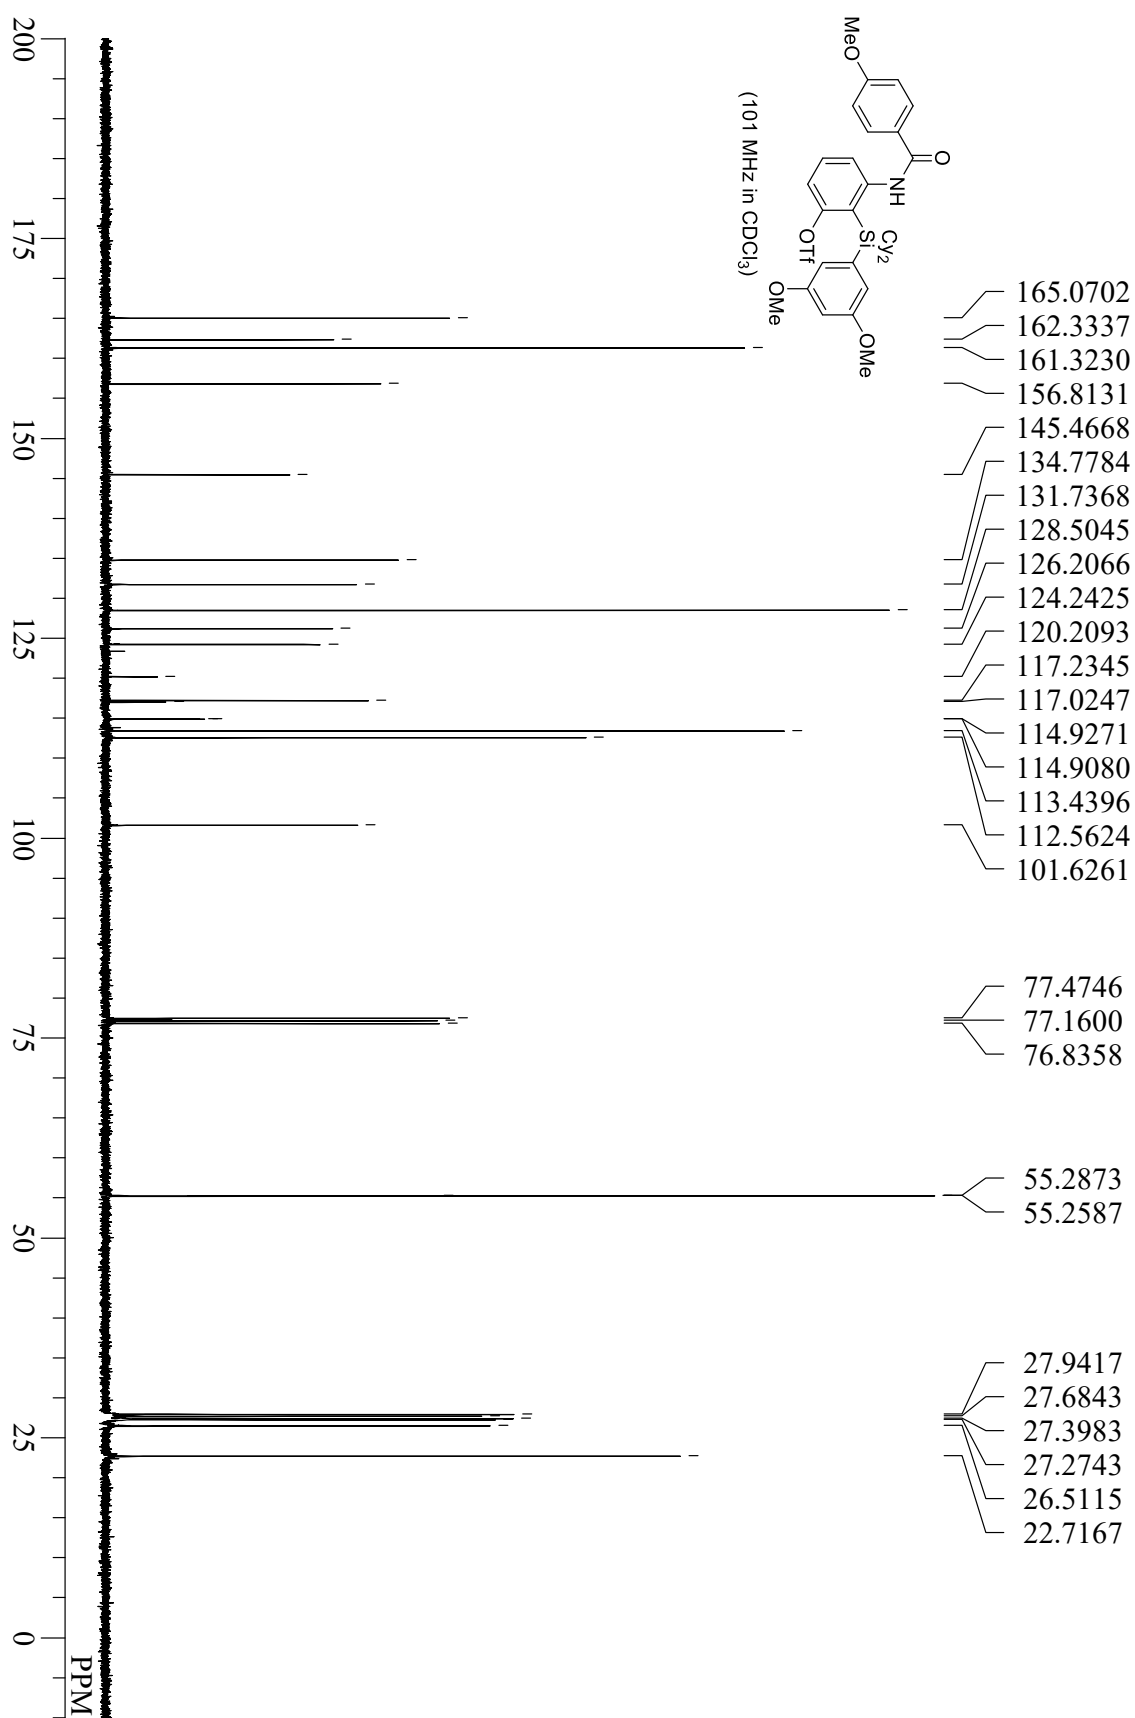

compound **1m**

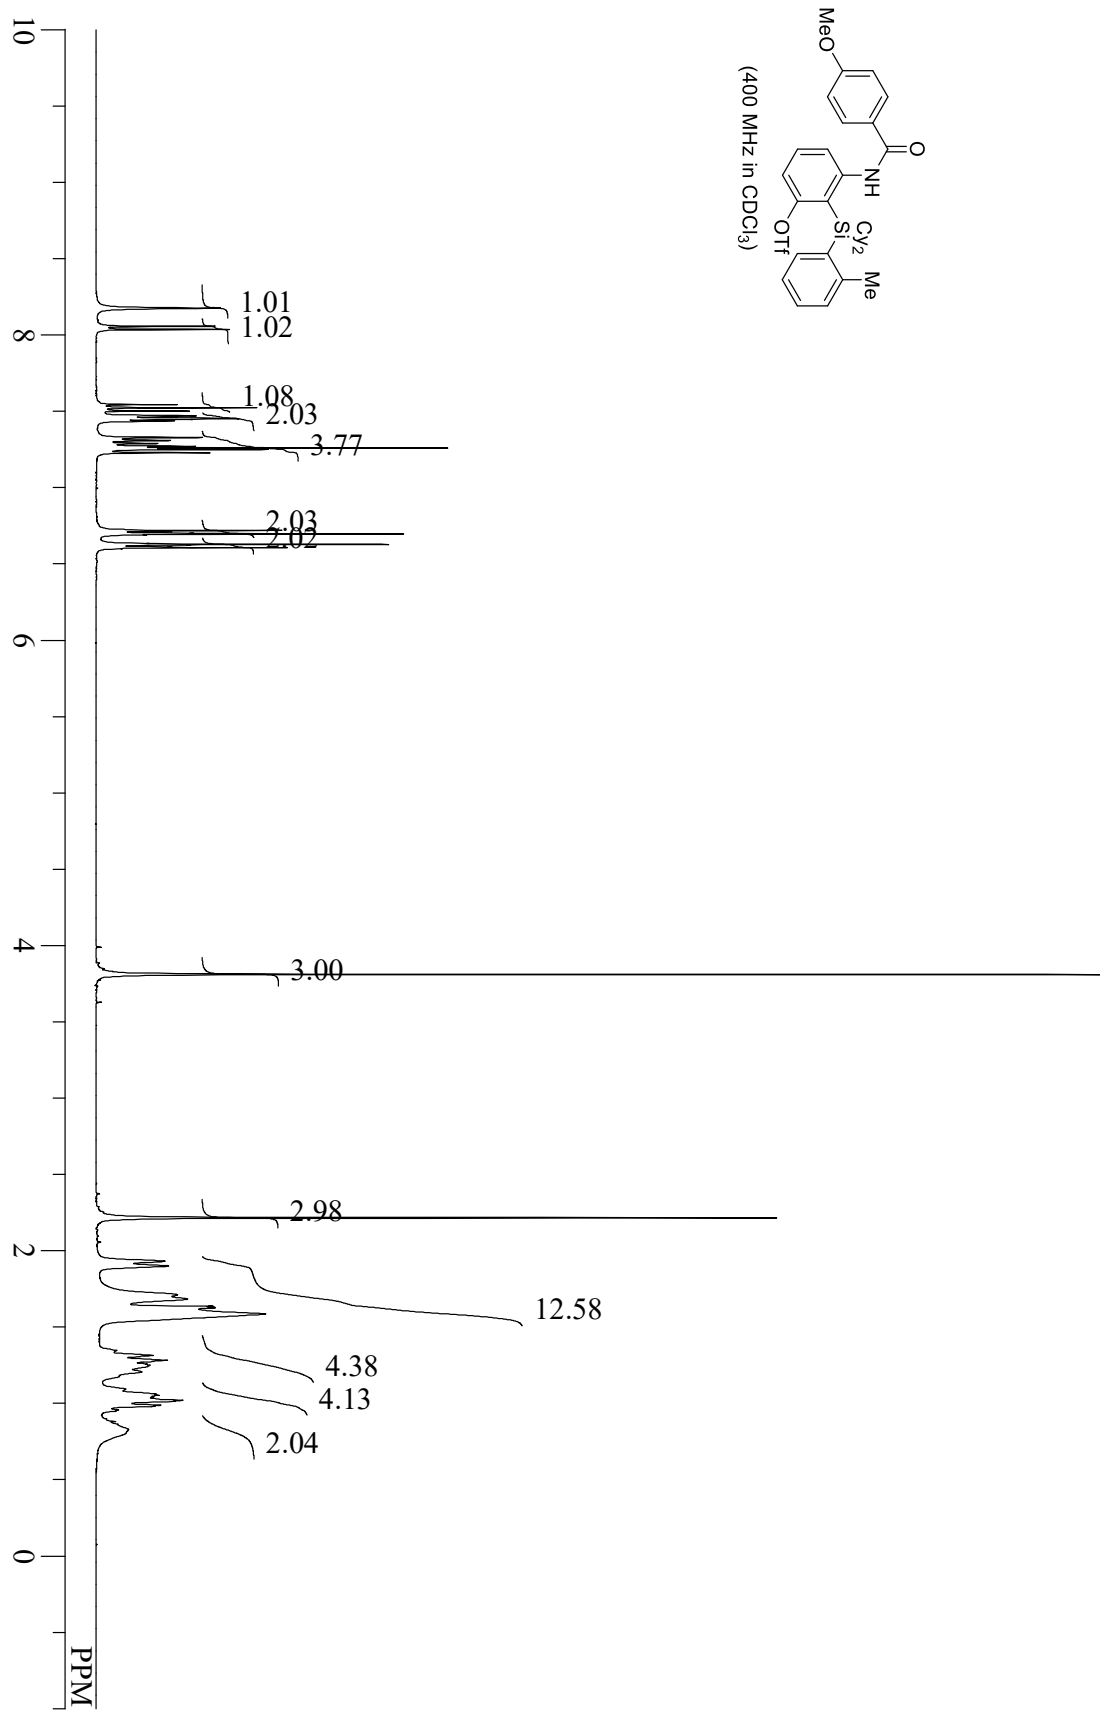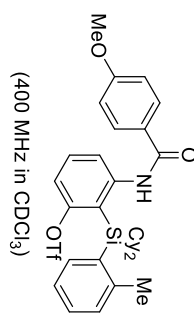

compound 1m

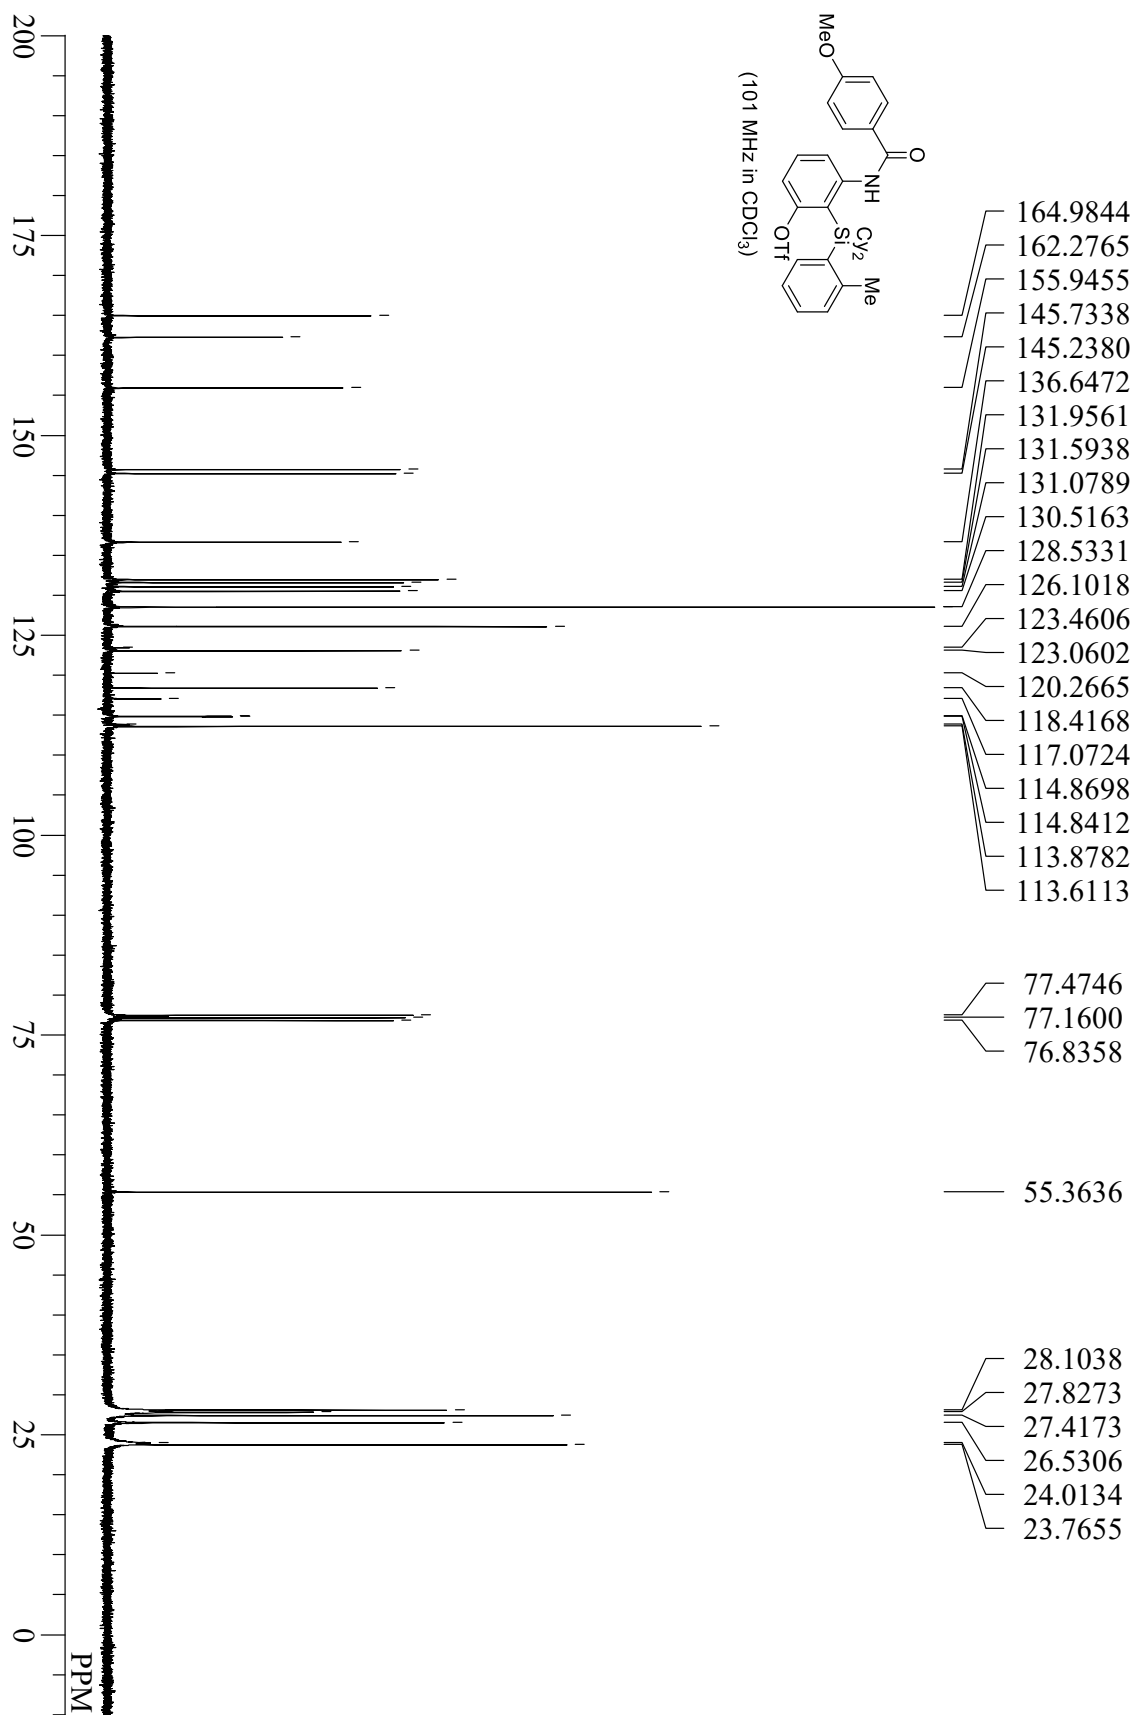

compound **1n**

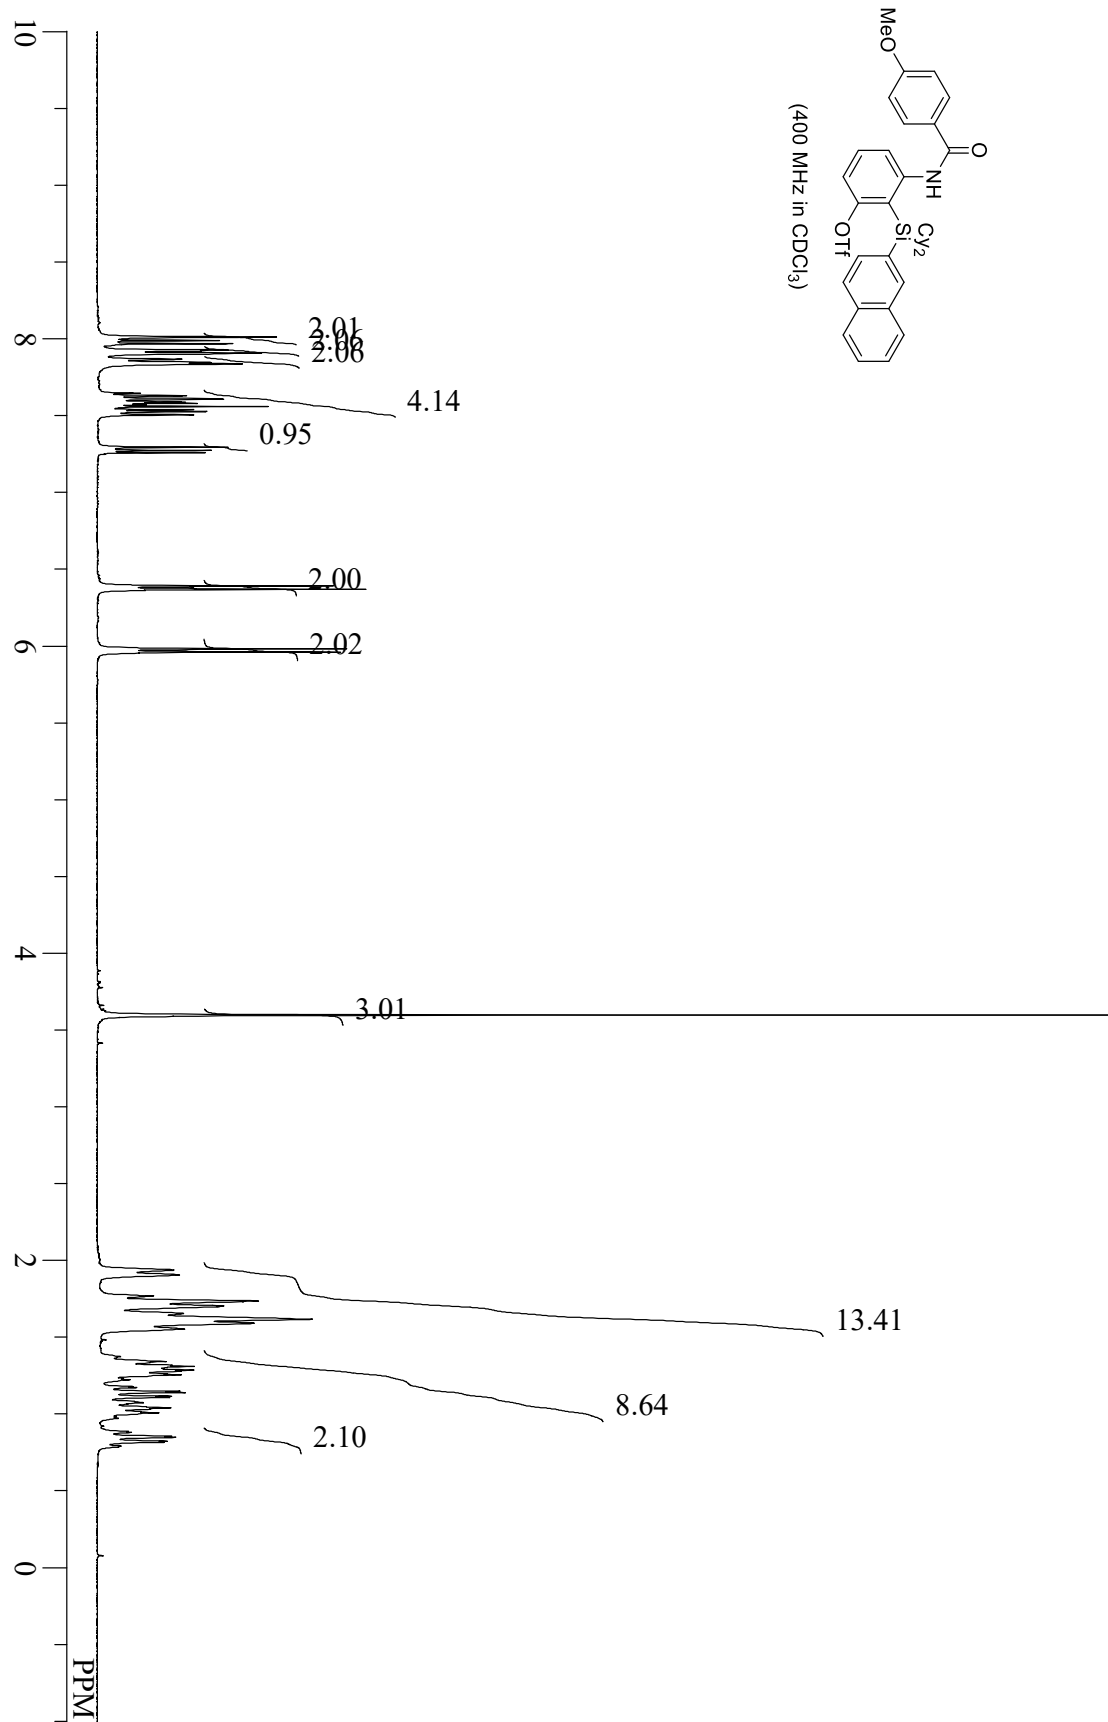

compound **1n**

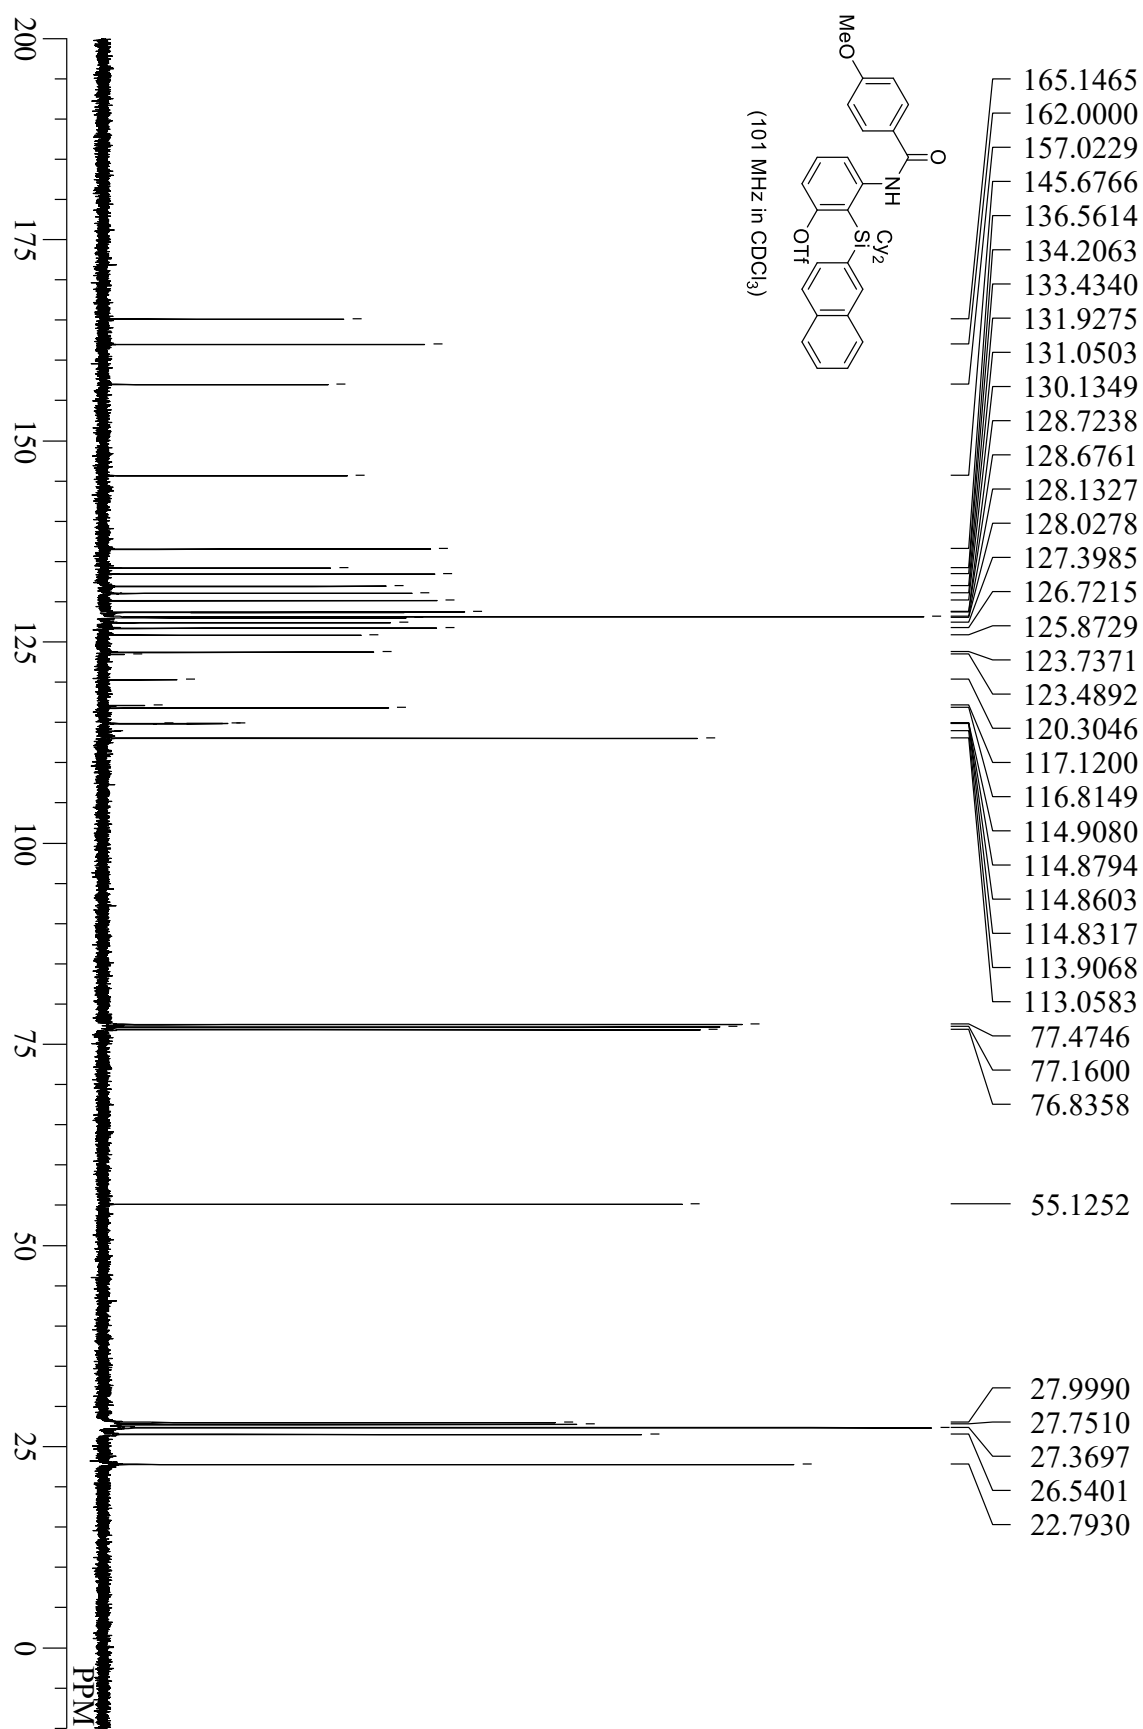



compound **10**

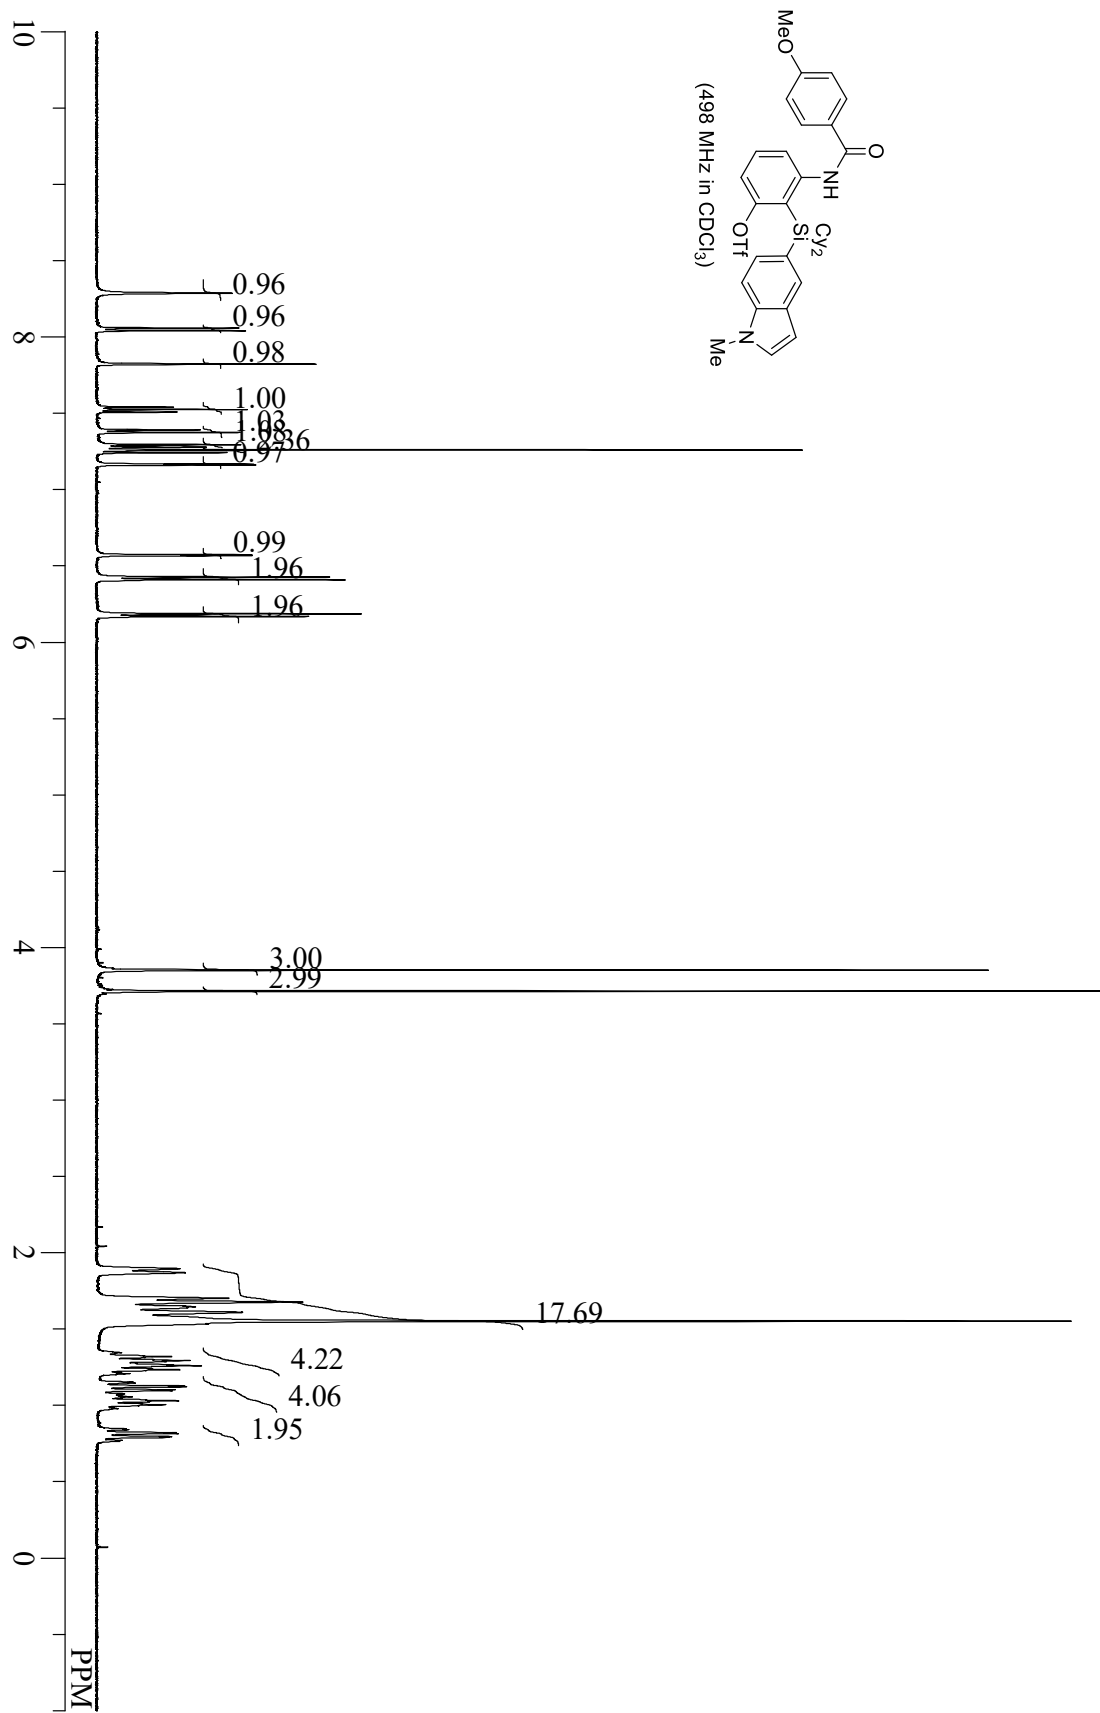

compound 1o

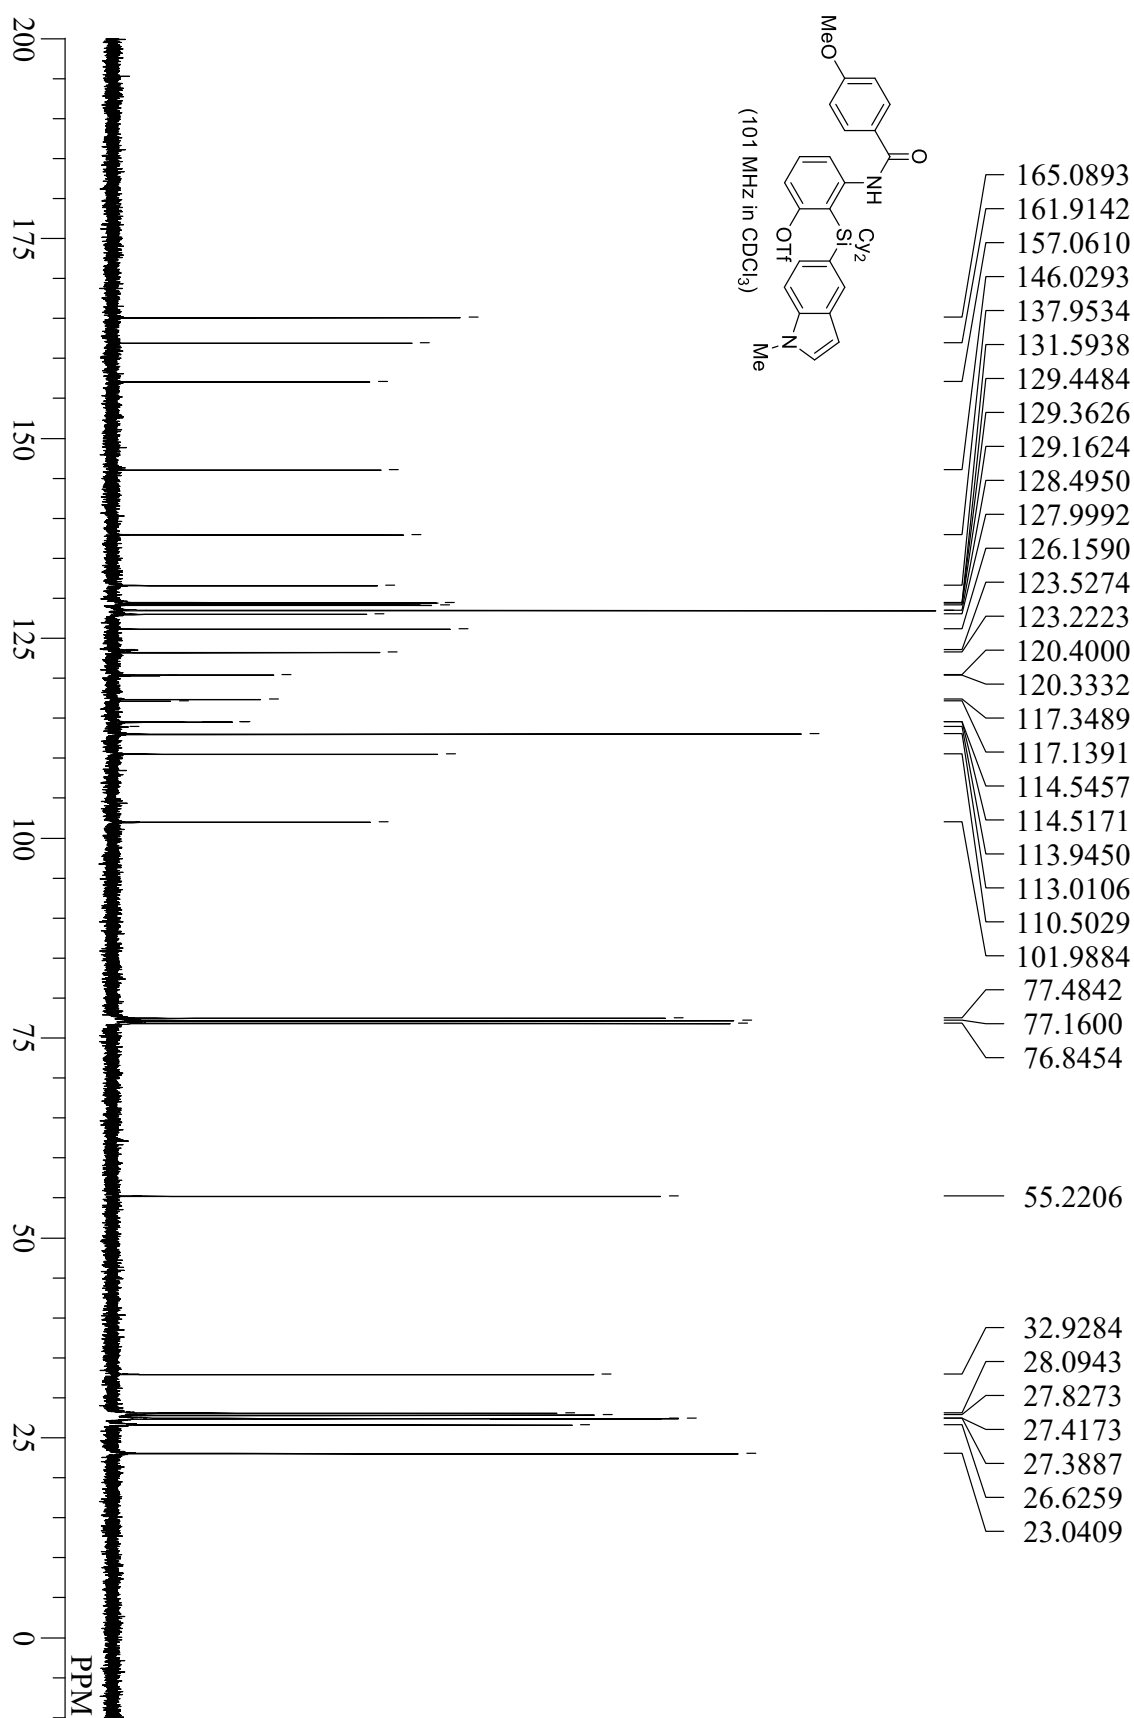

compound **1p**

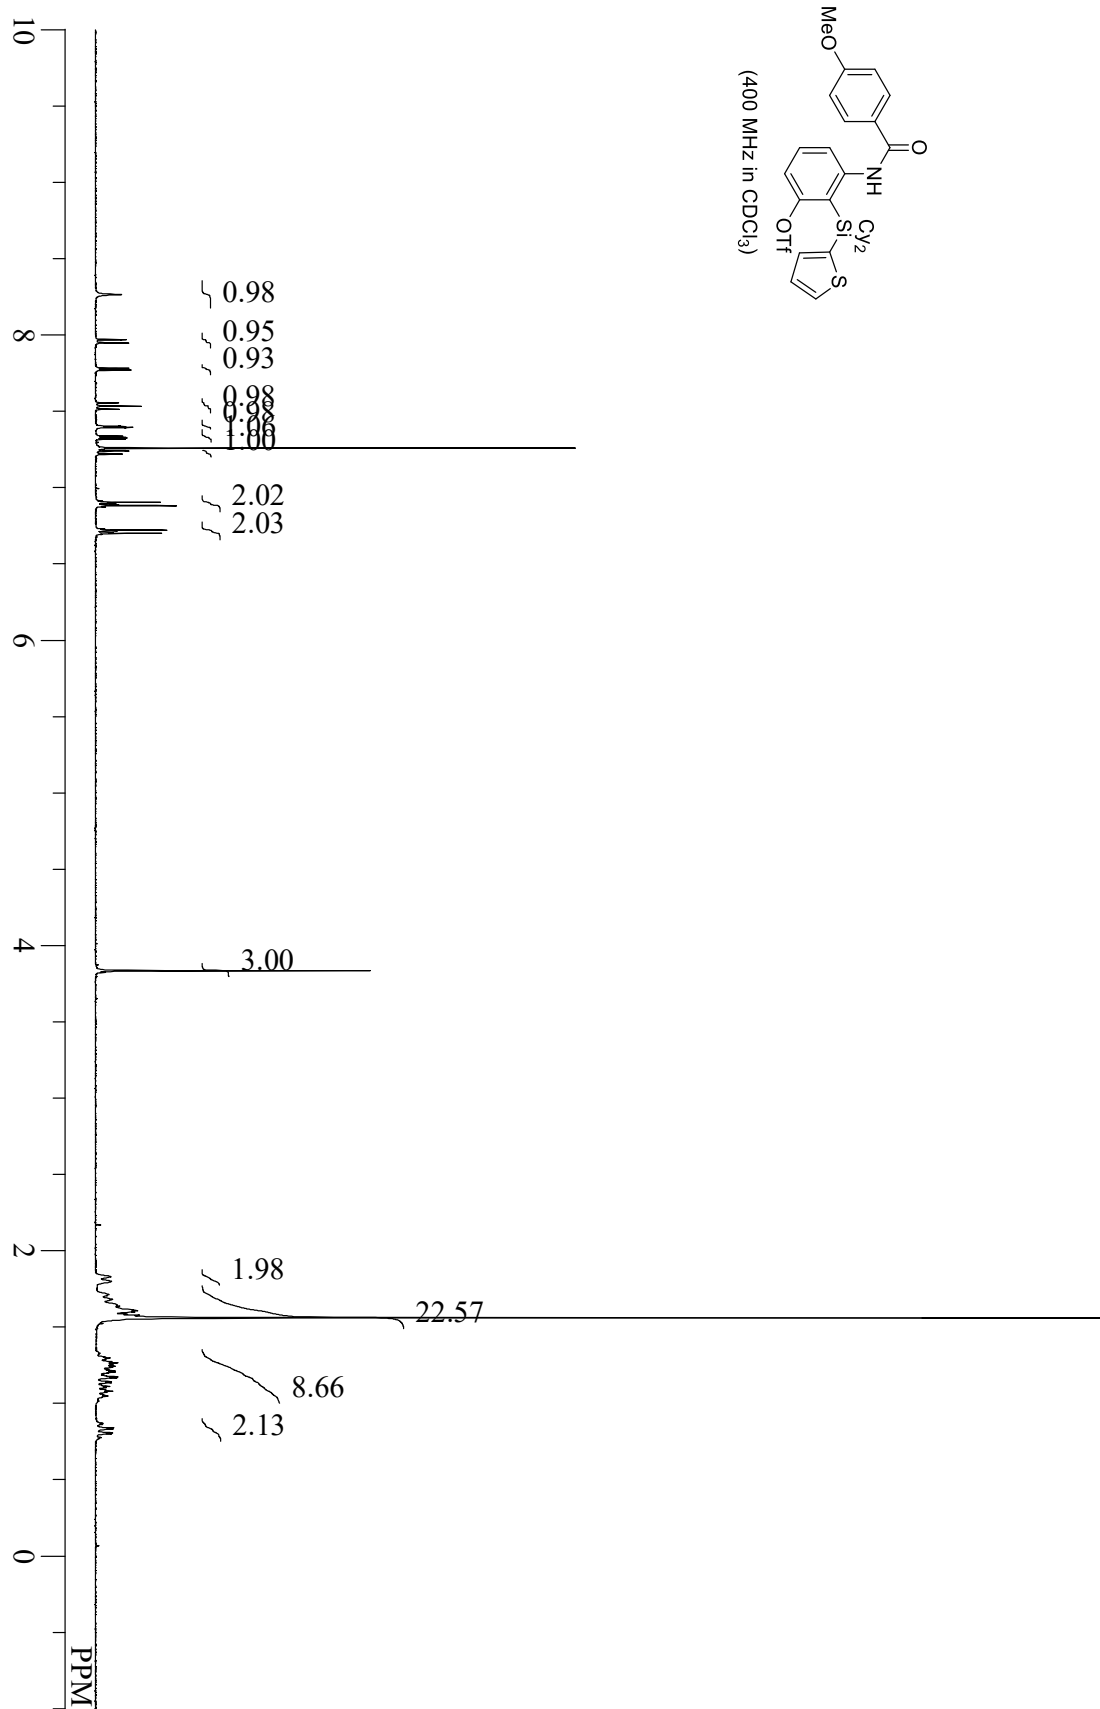

compound 1p

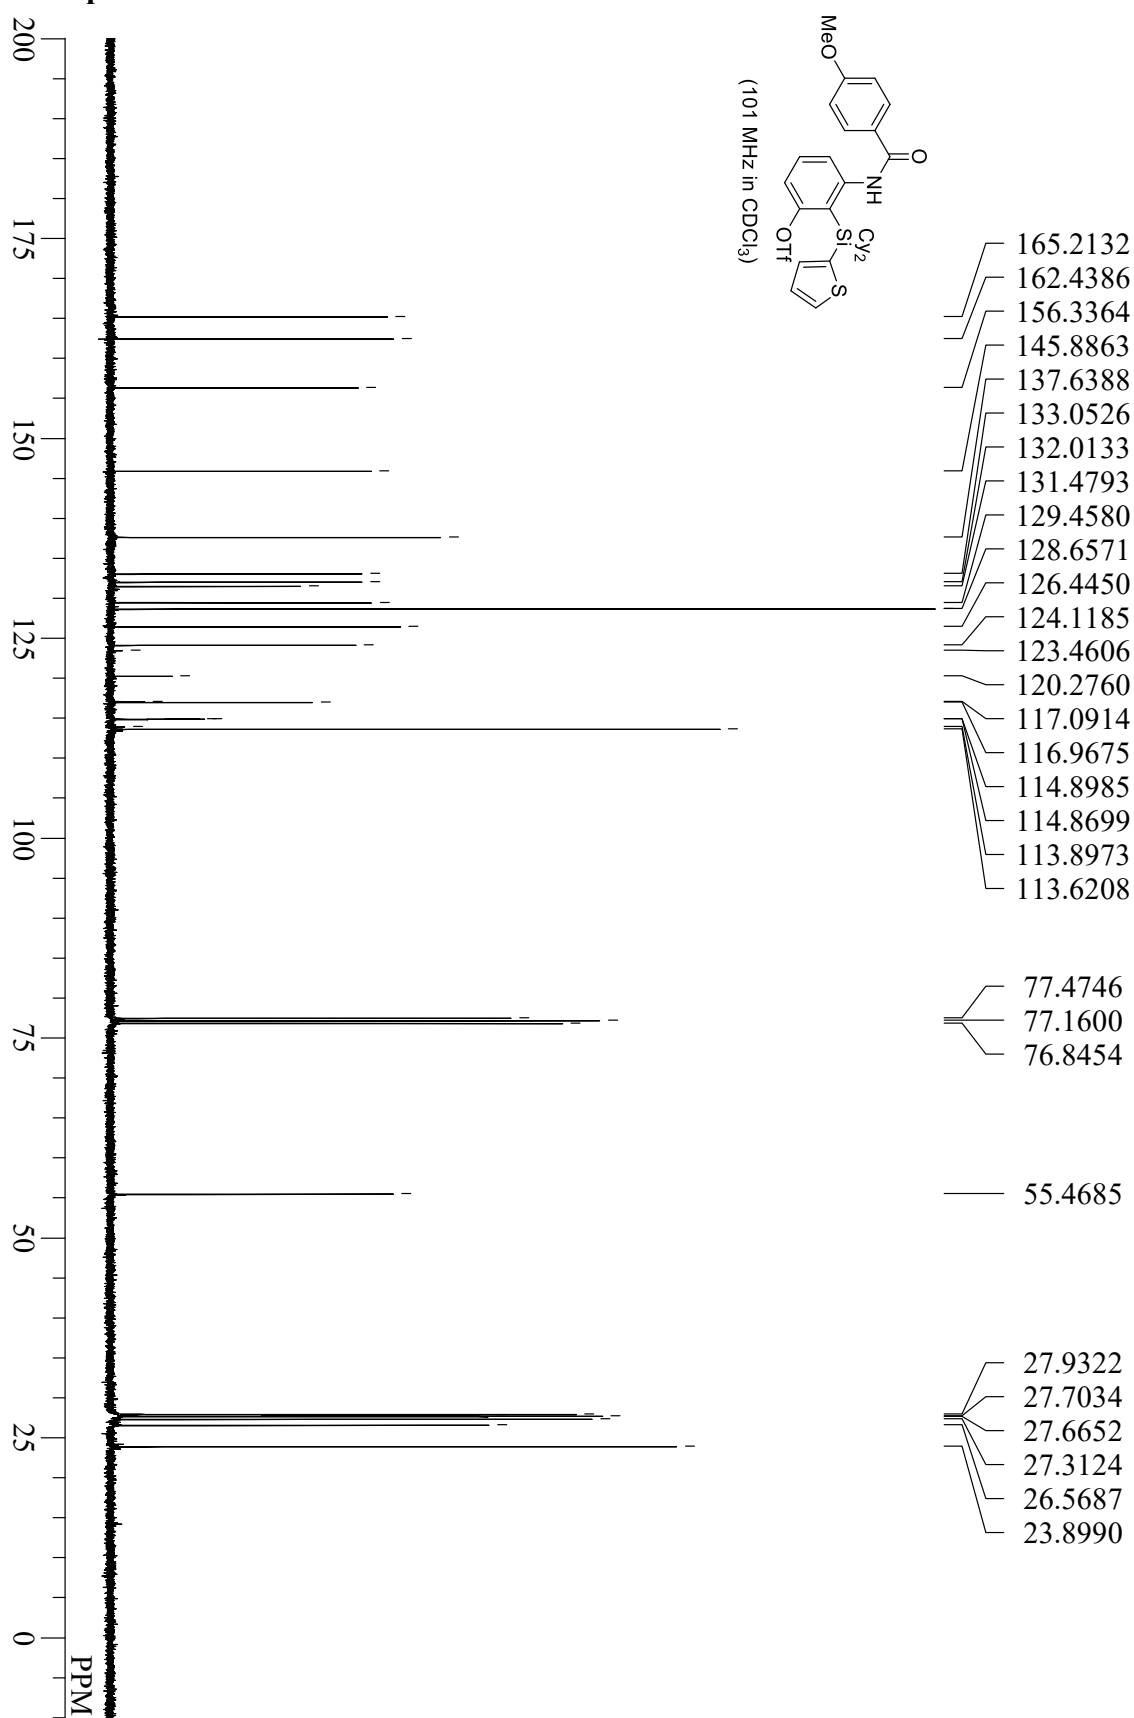

compound **1q**

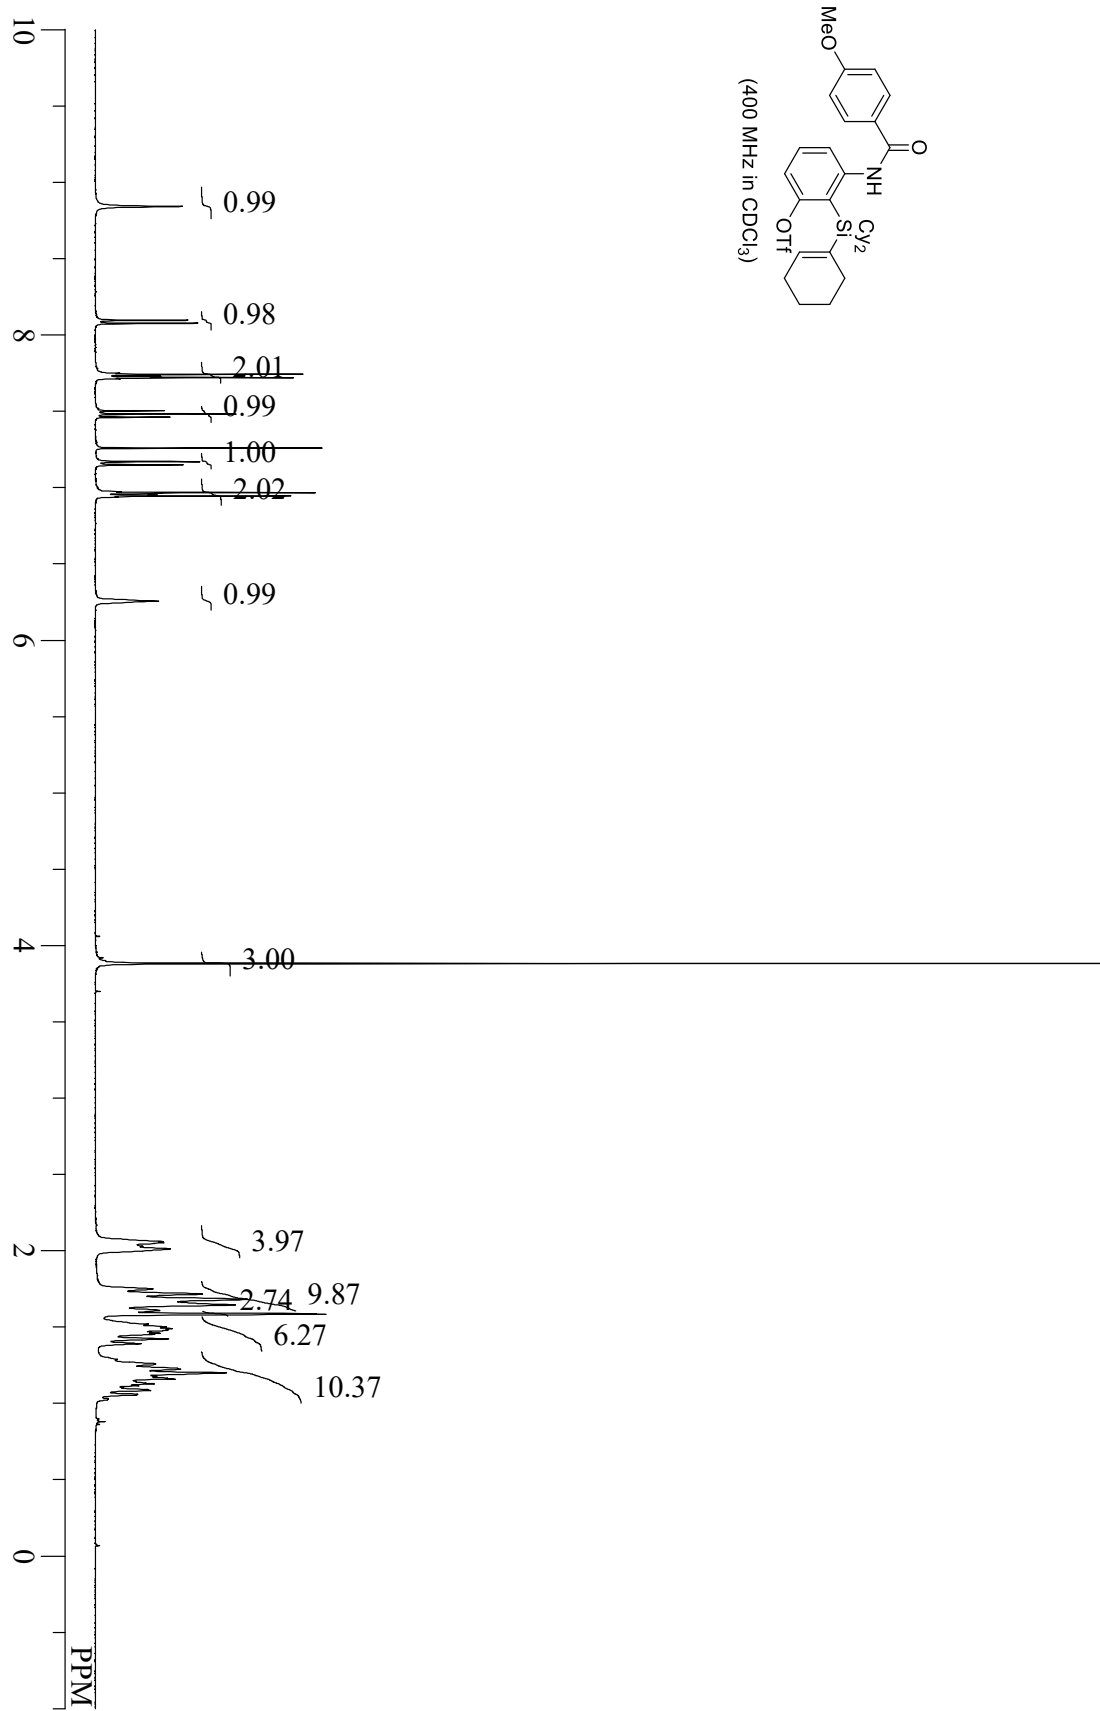

compound 1q

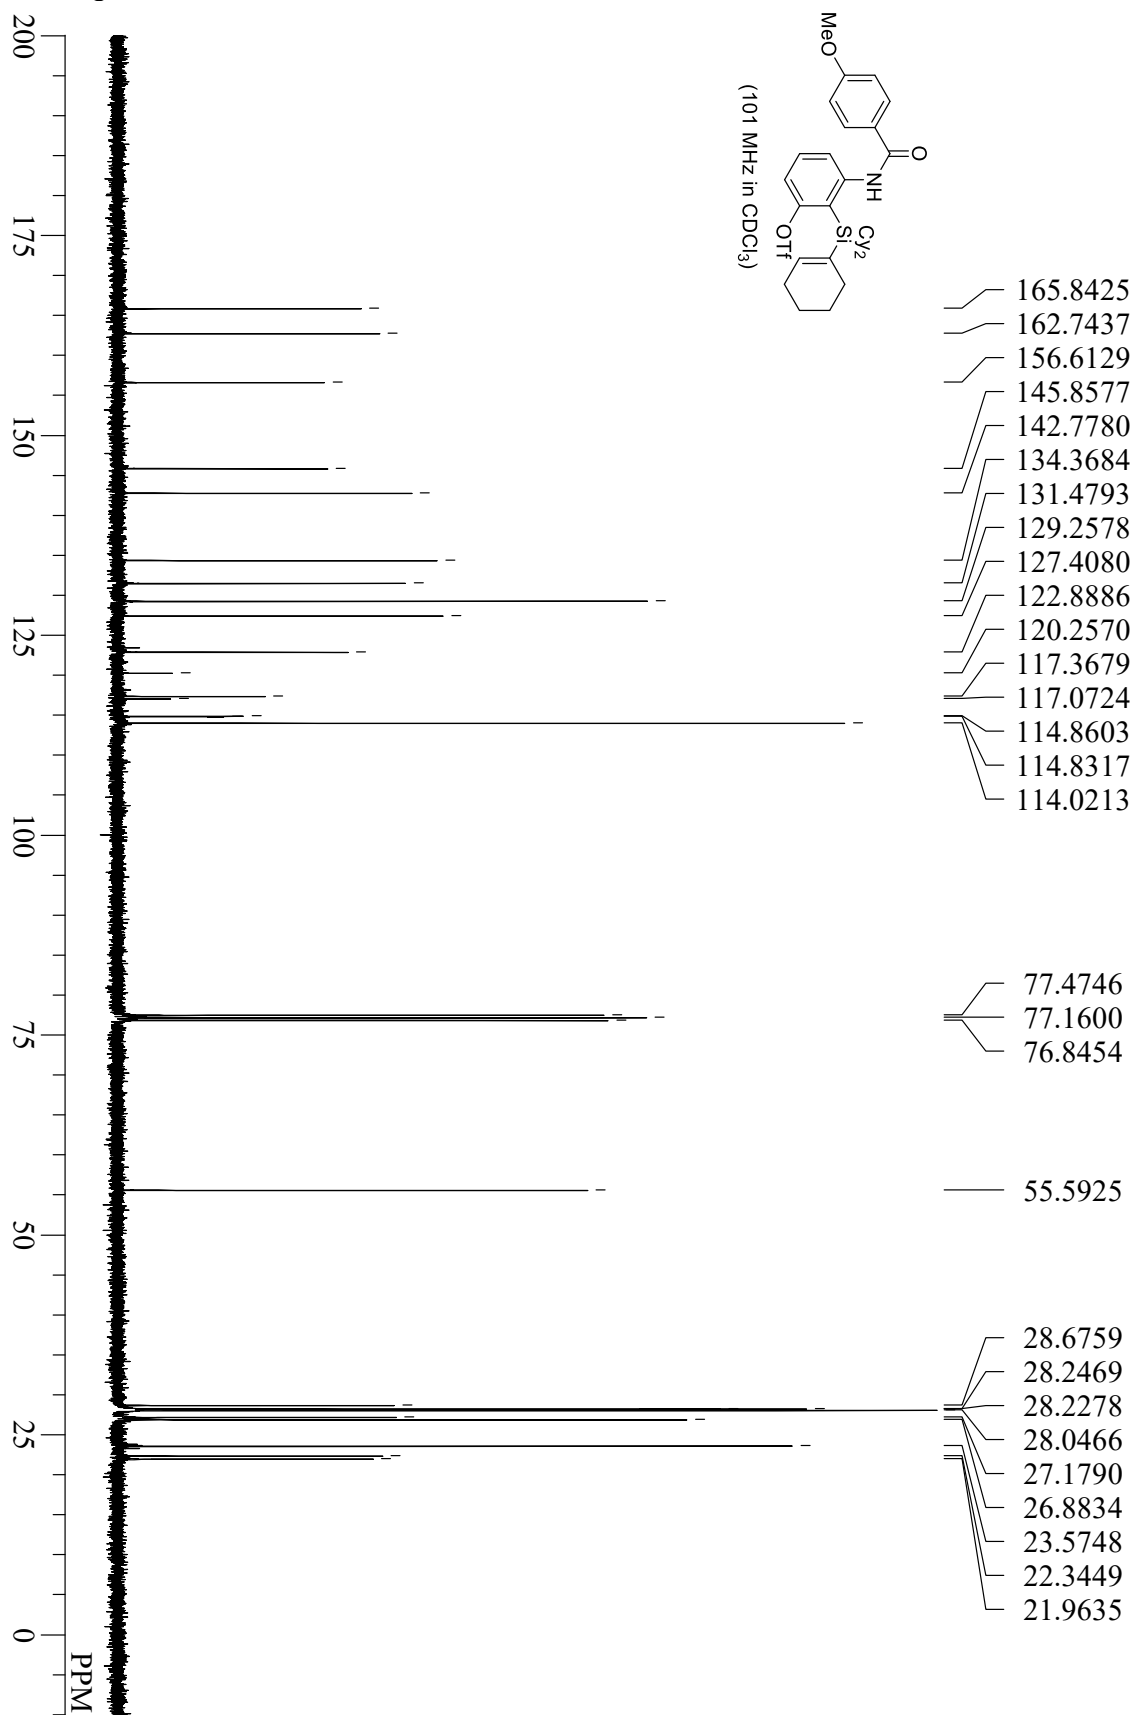

compound **1r**

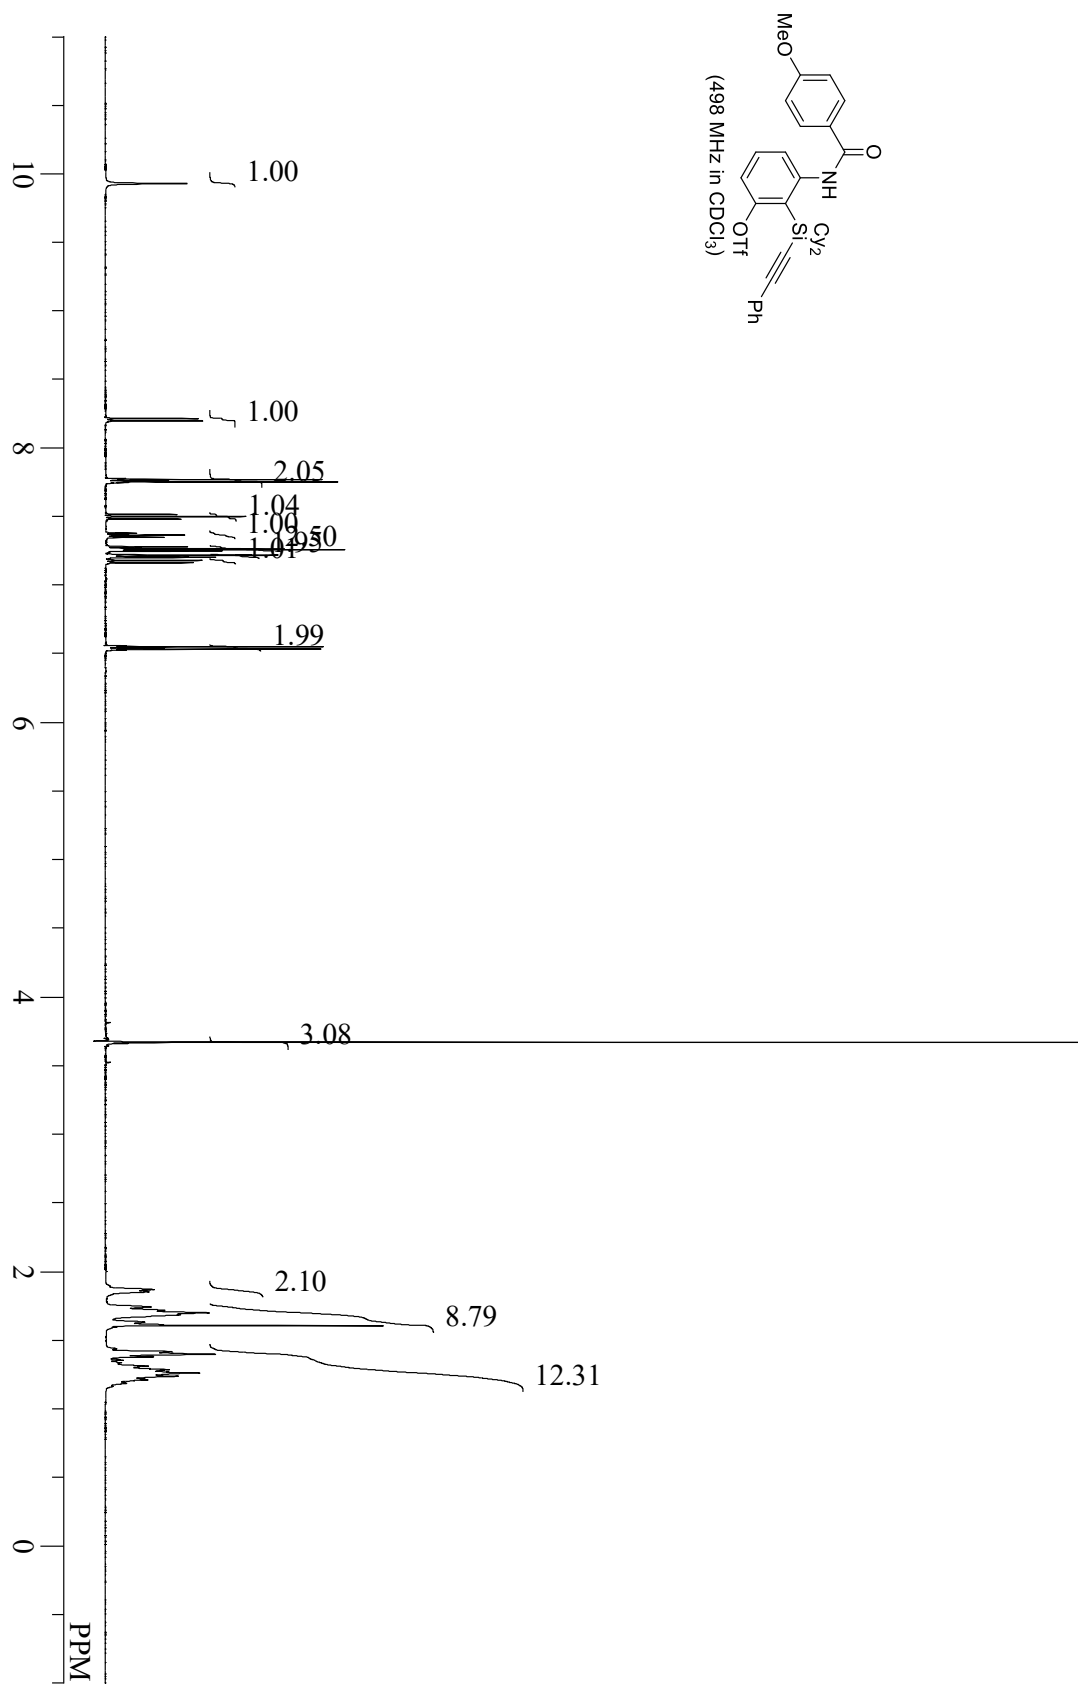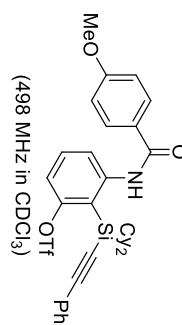

compound 1r

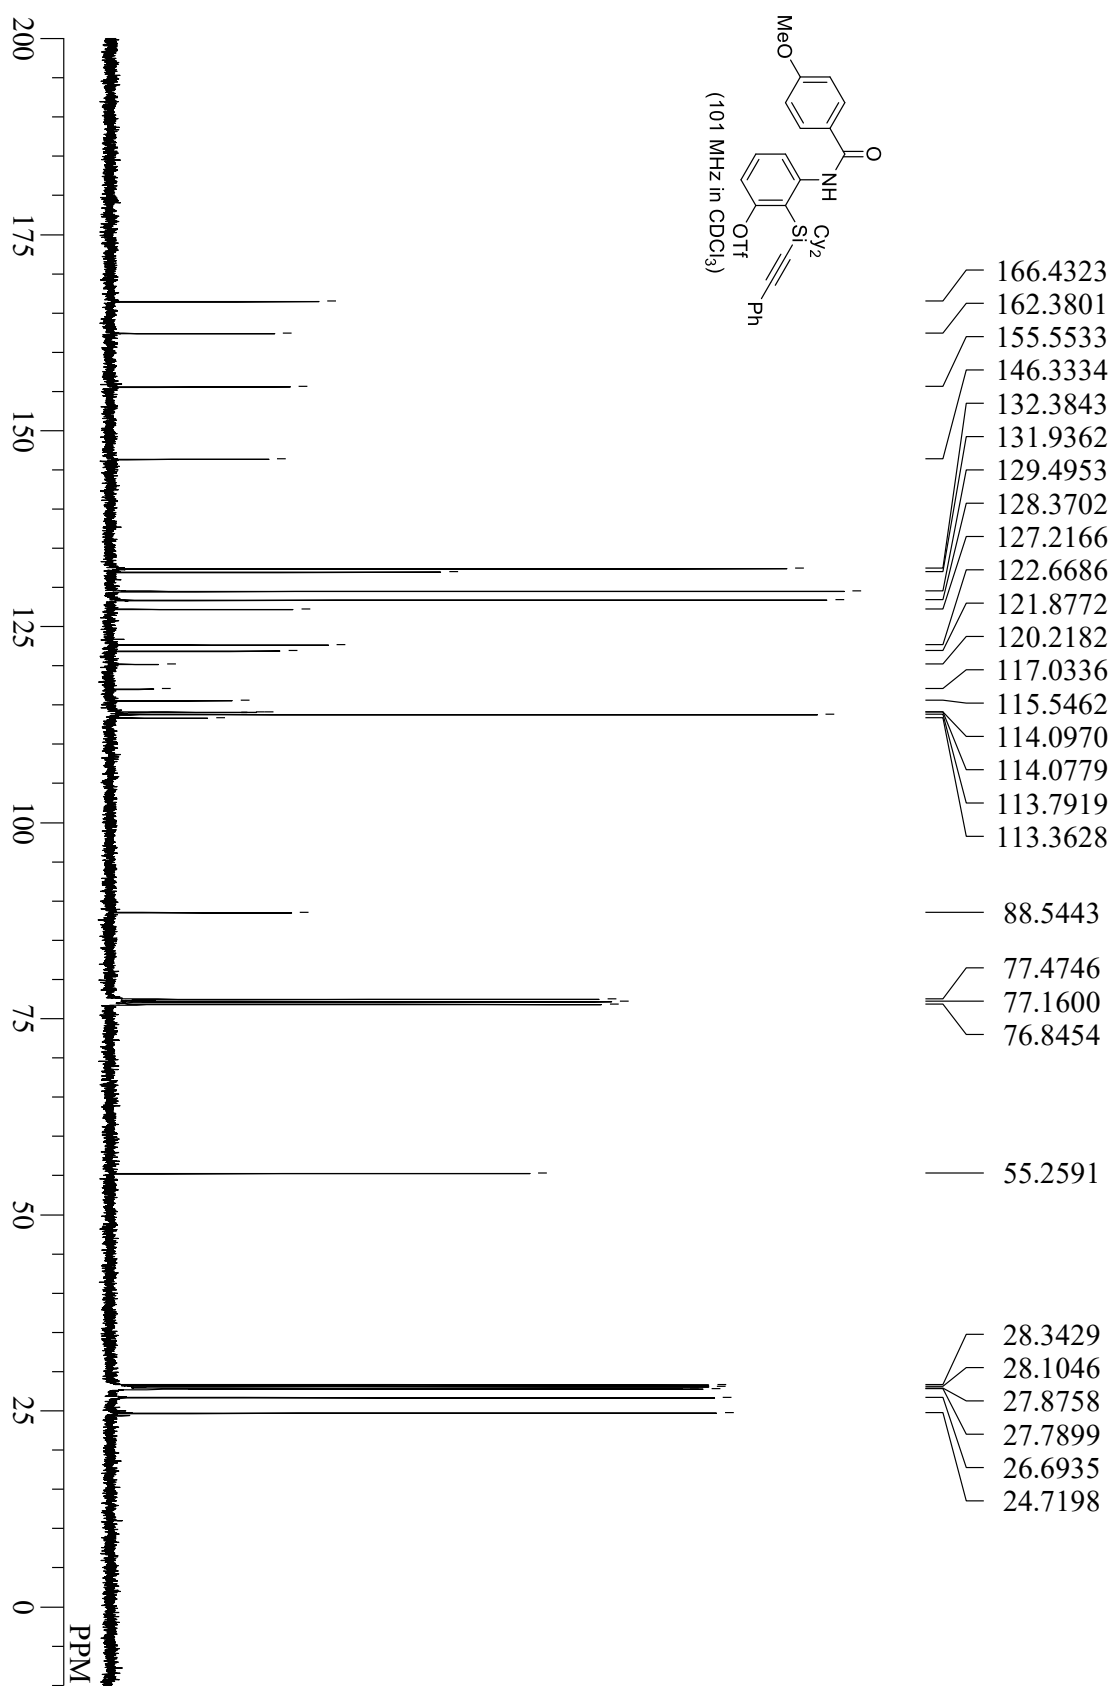



compound **1s**

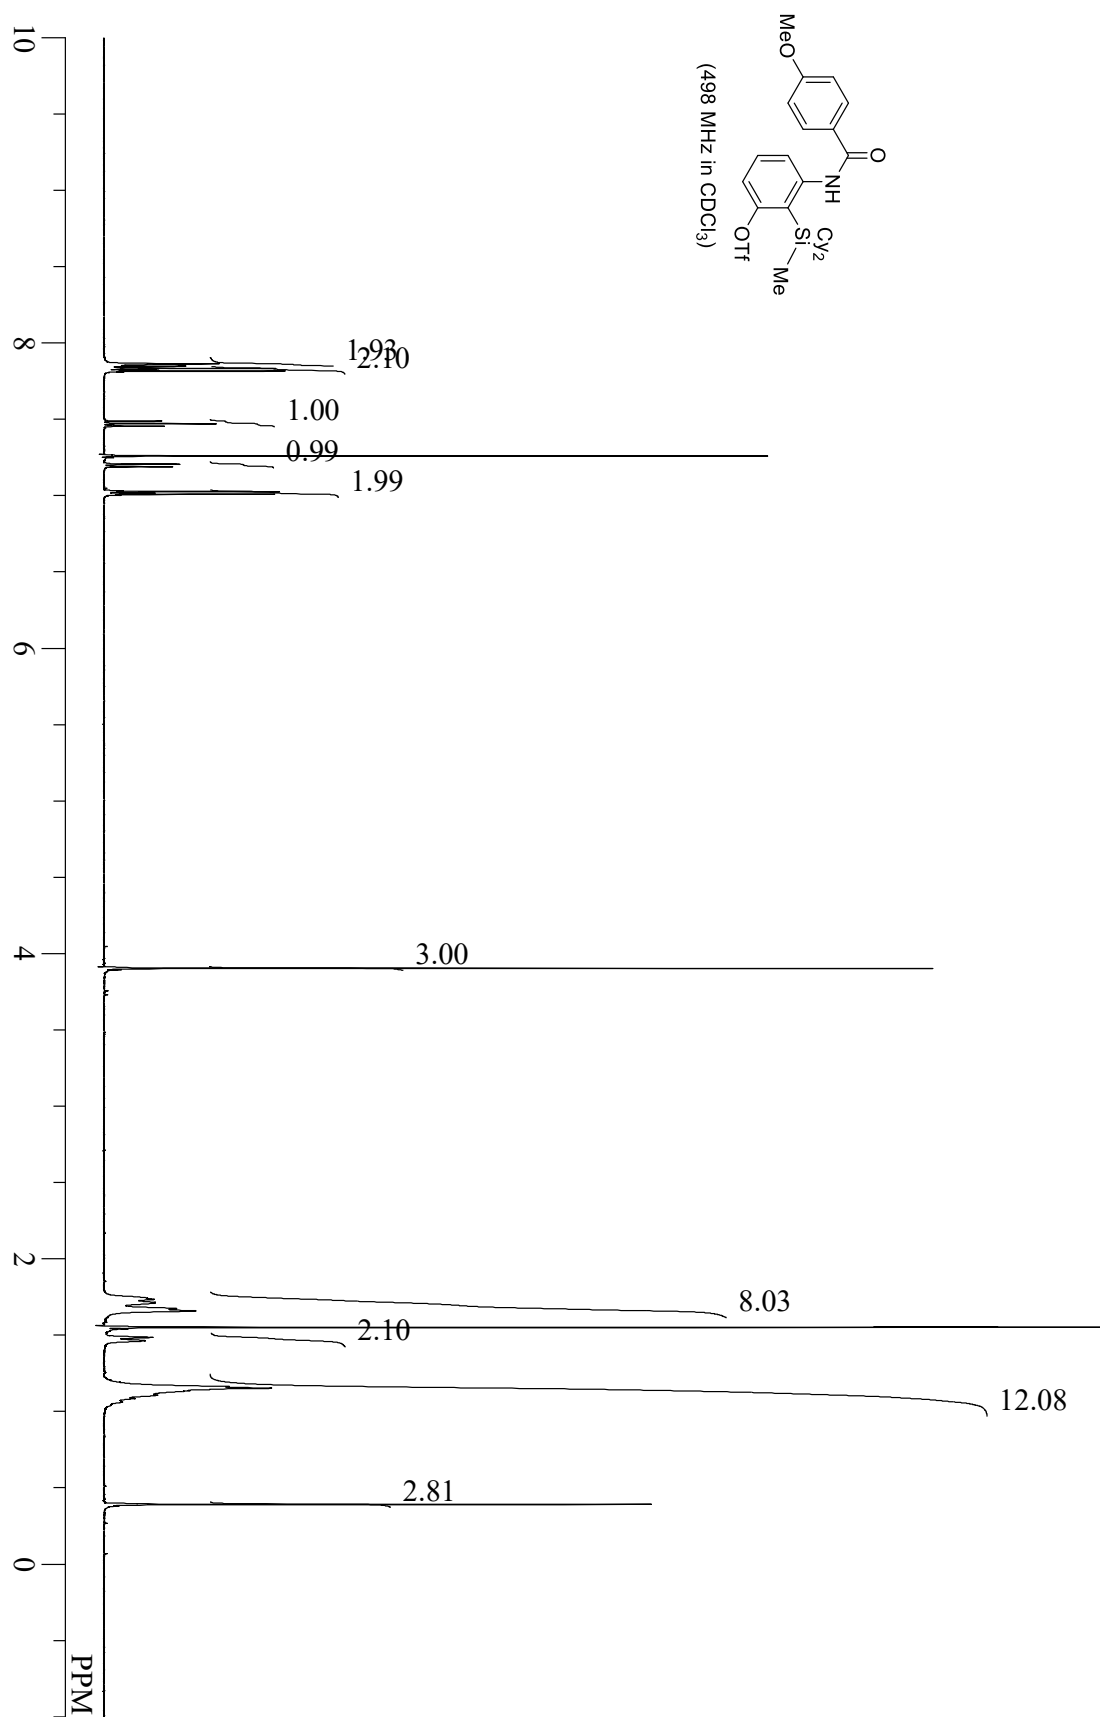

compound 1s

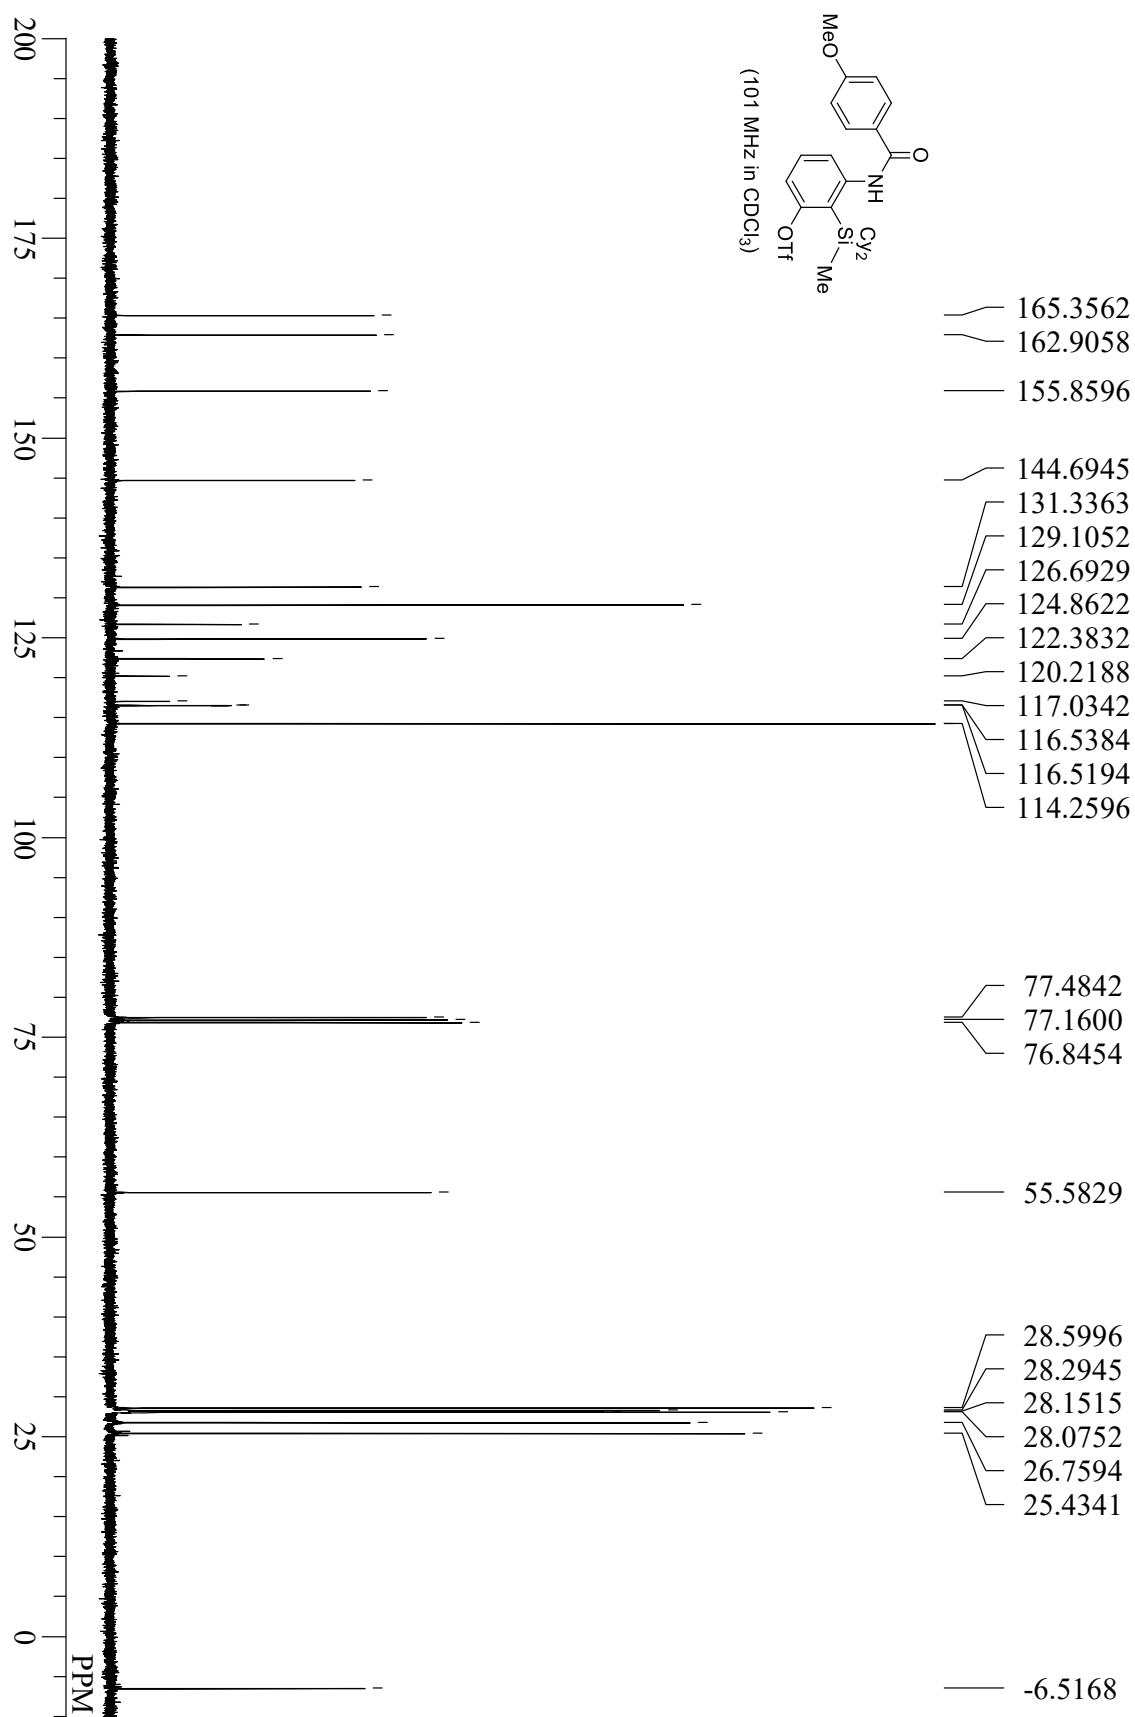

compound **1t**

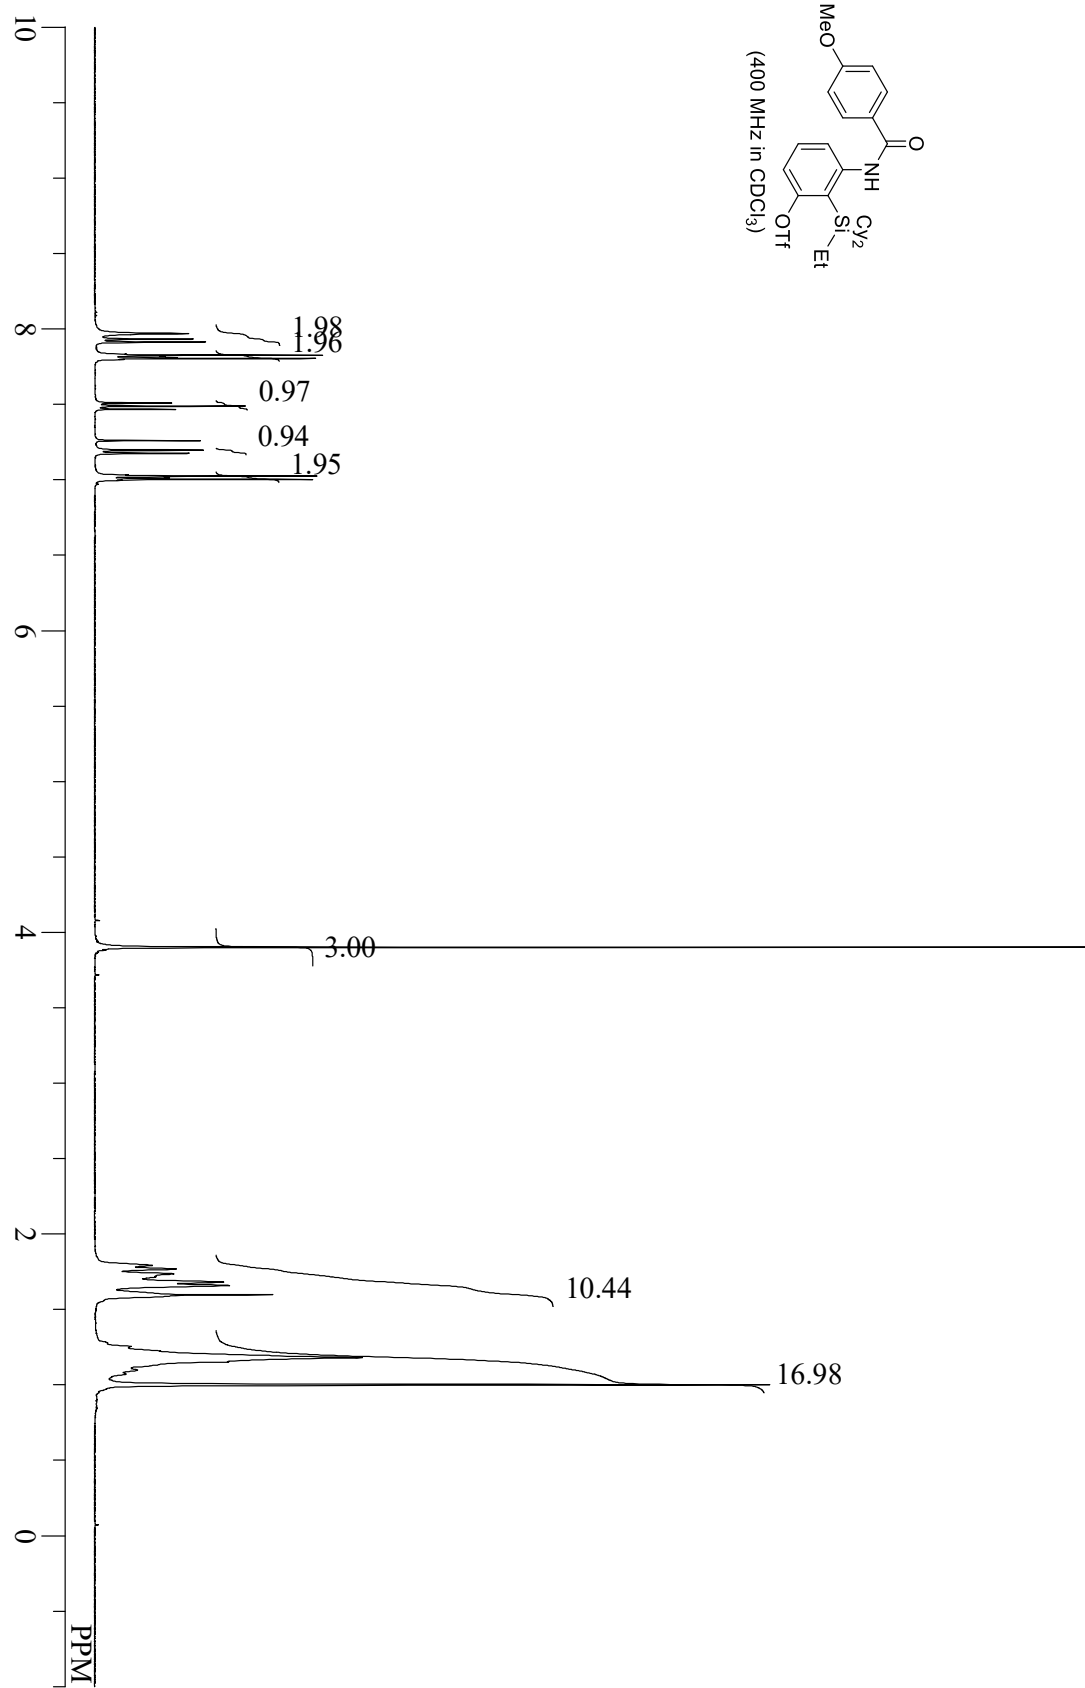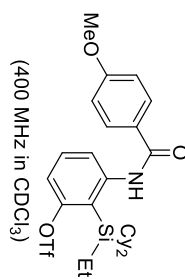

compound **1t**

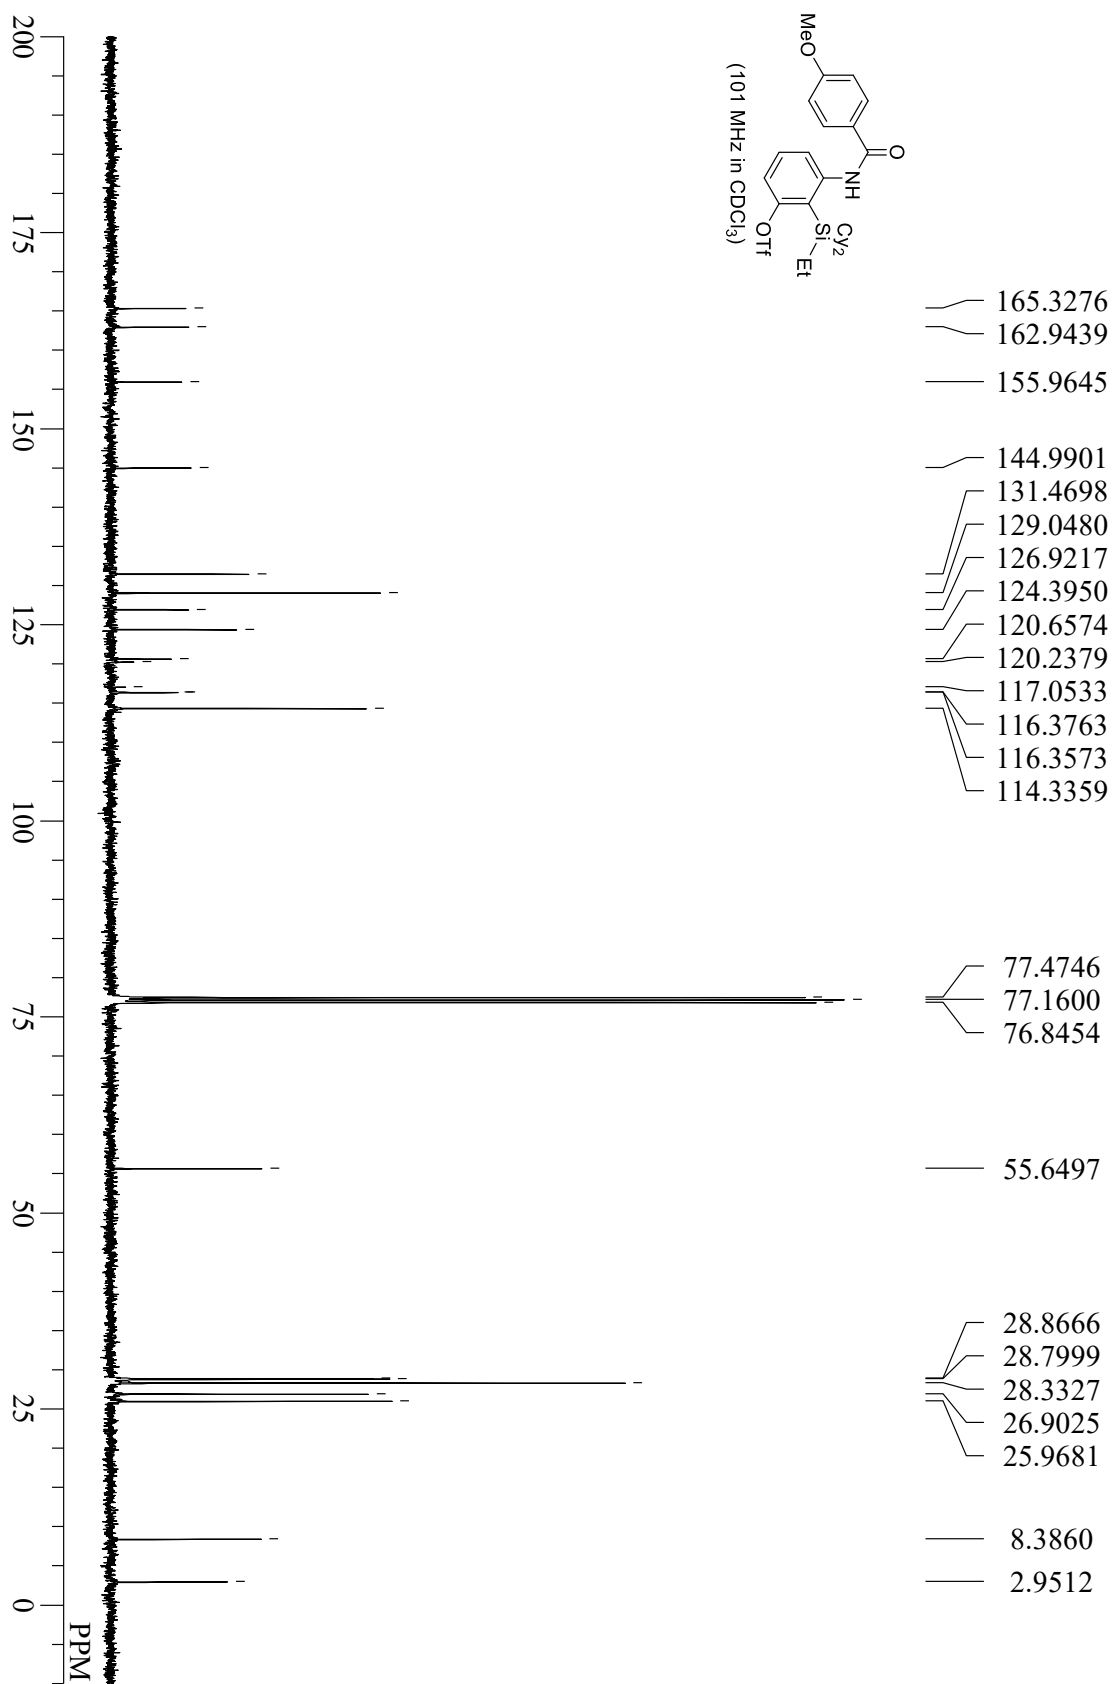

compound **1u**

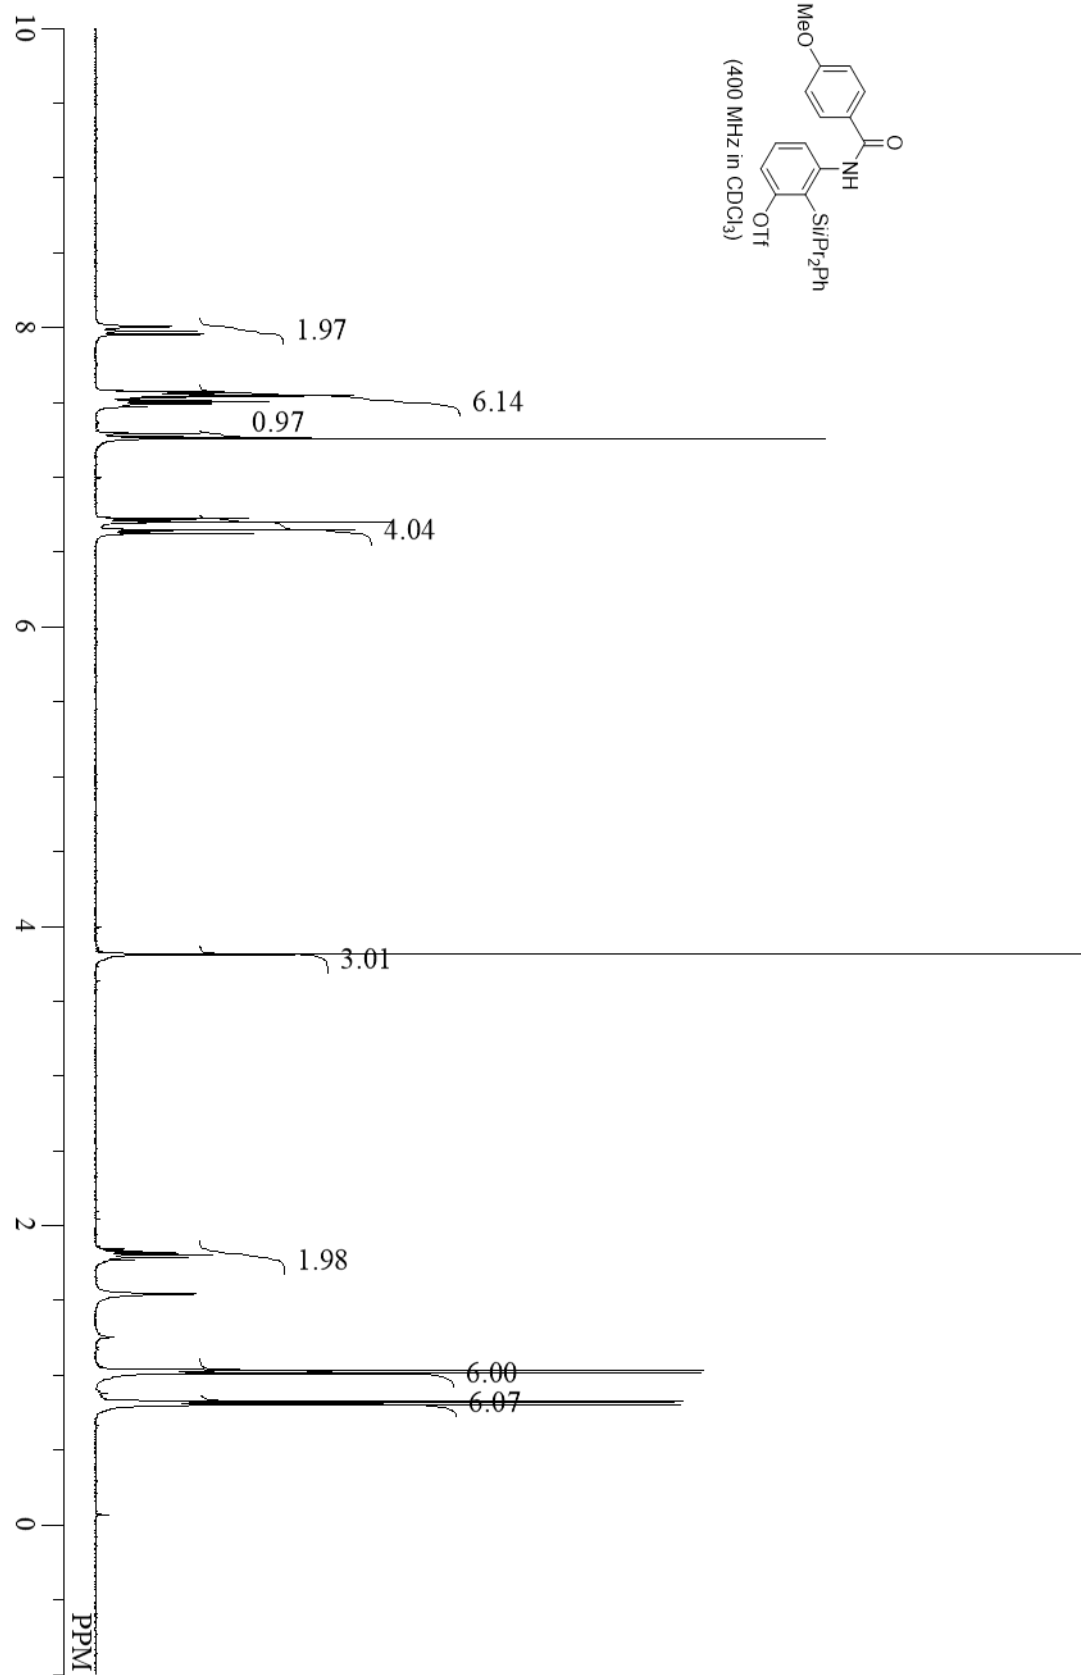

compound **1u**

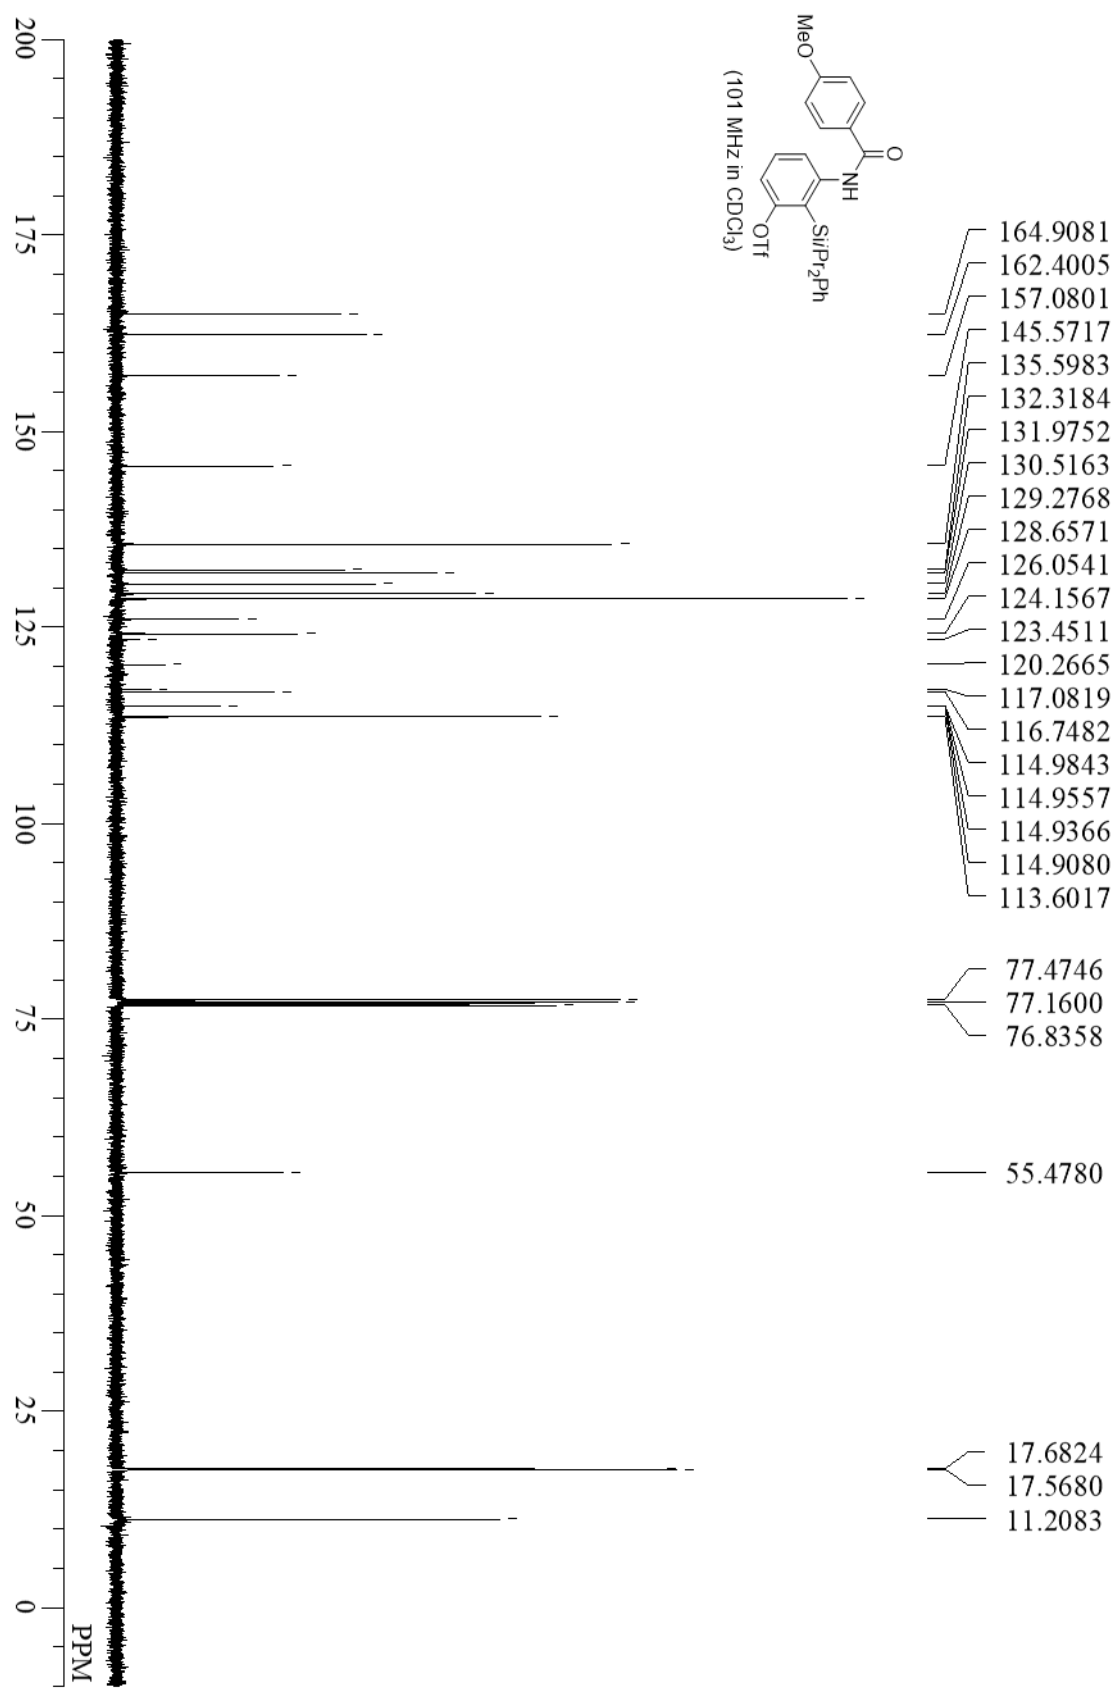

compound 1v

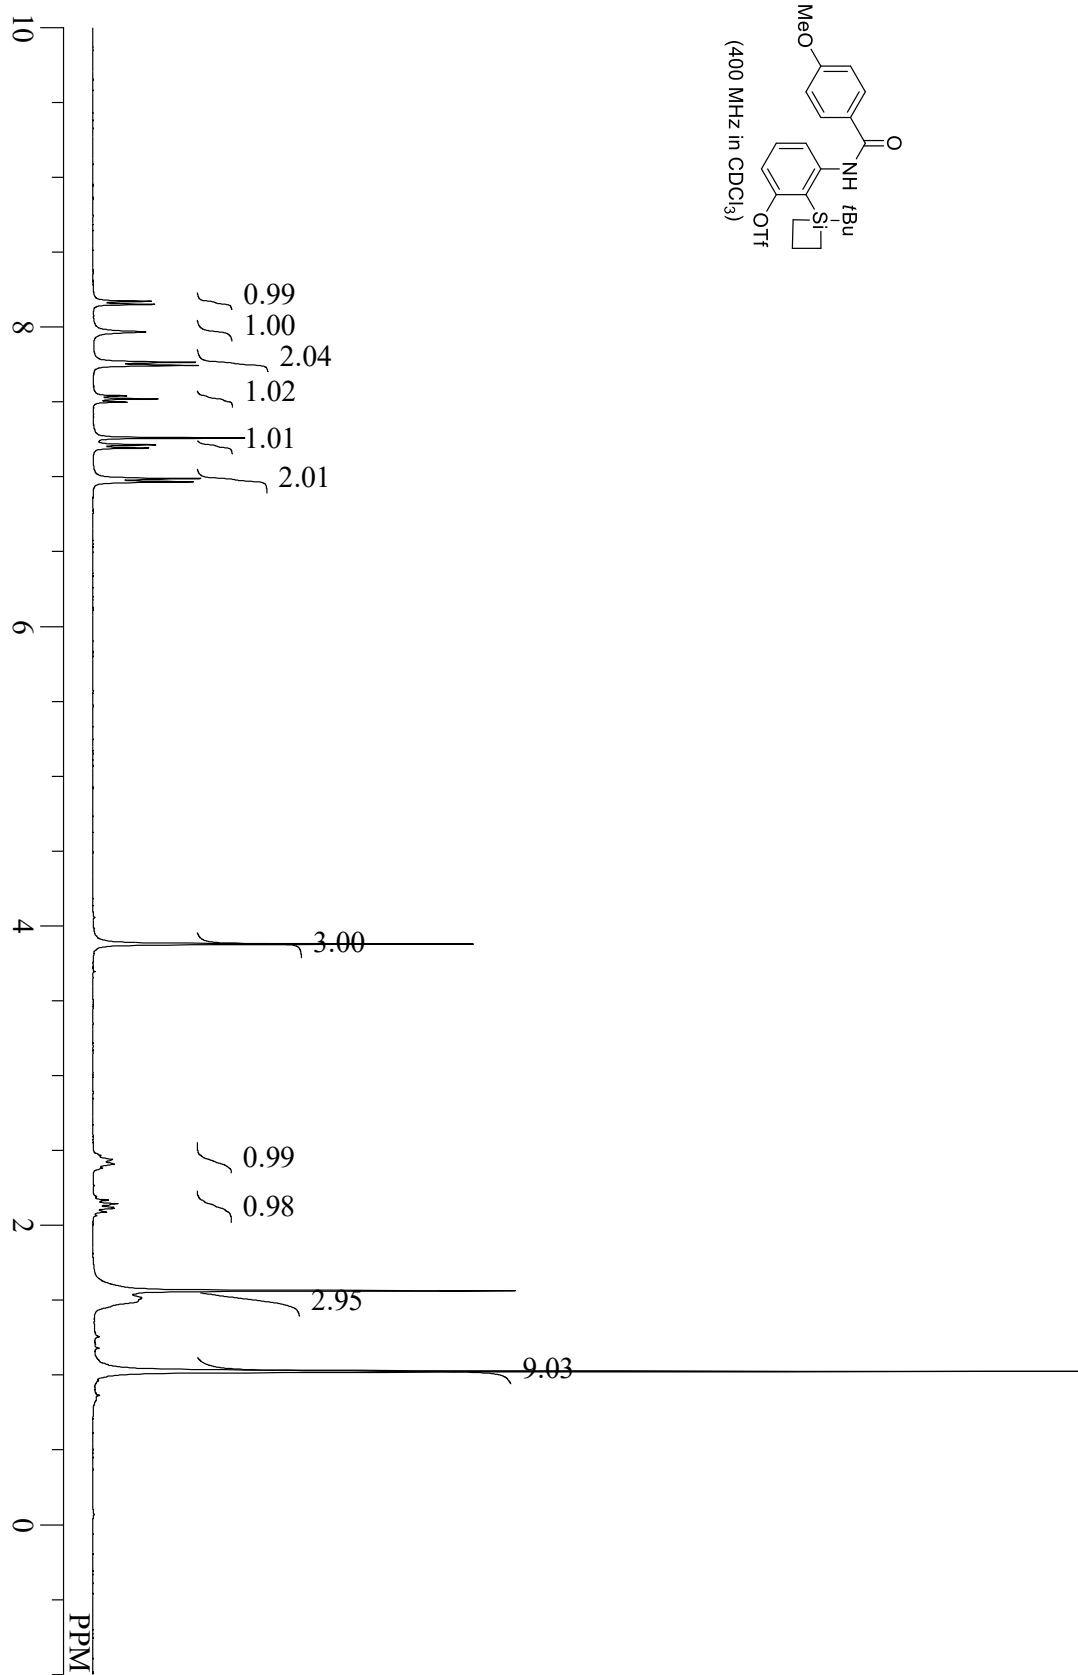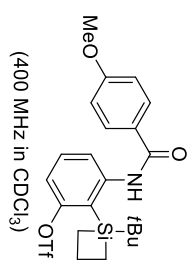

compound 1v

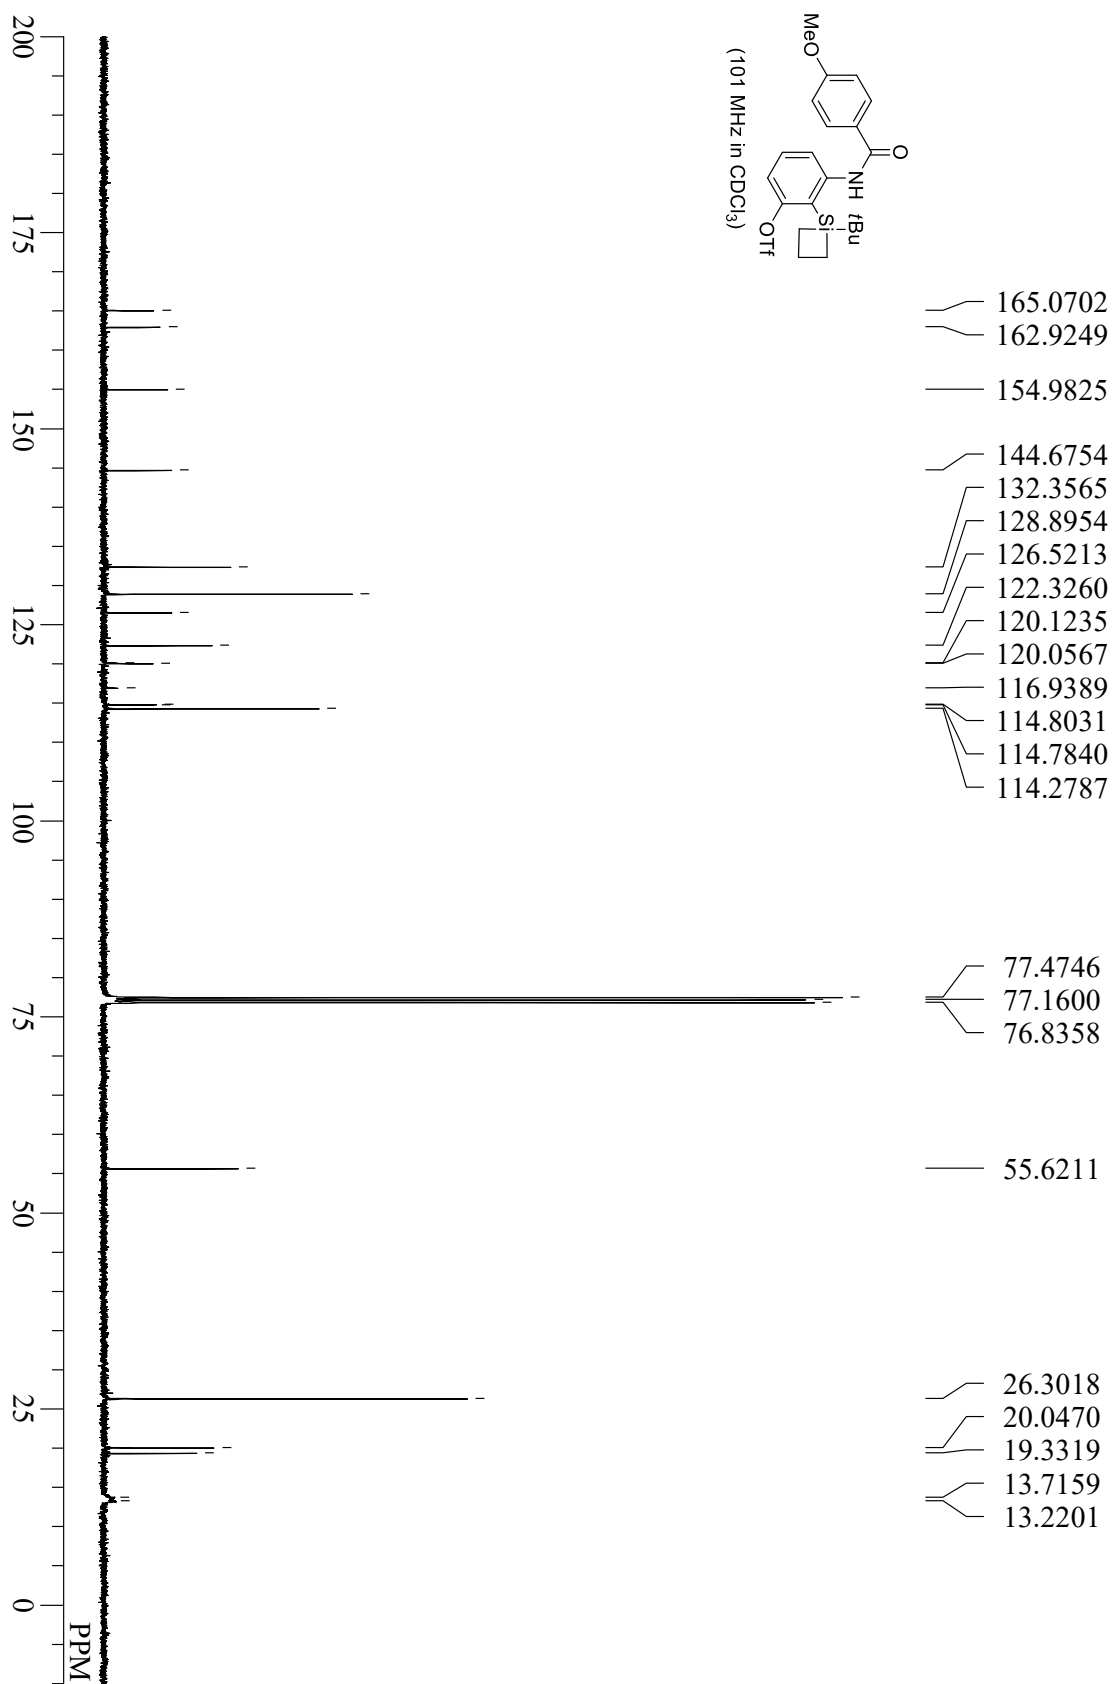



compound 1w

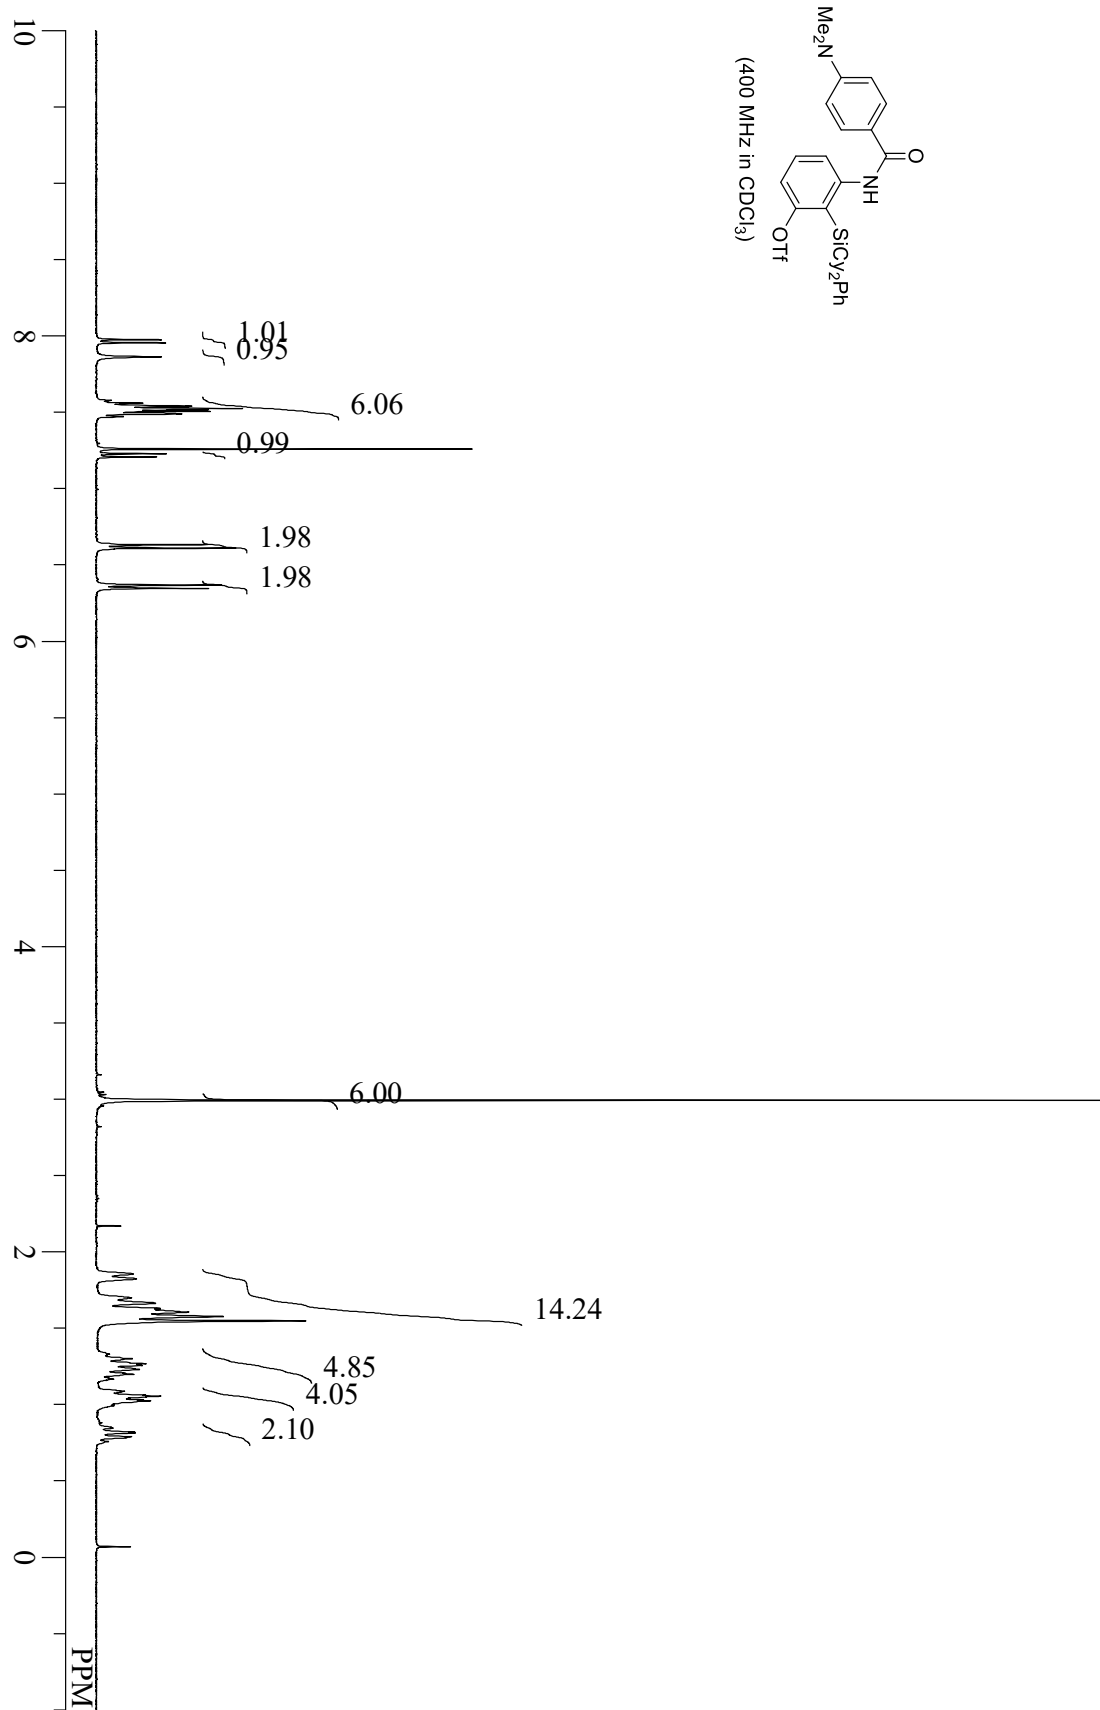

compound 1w

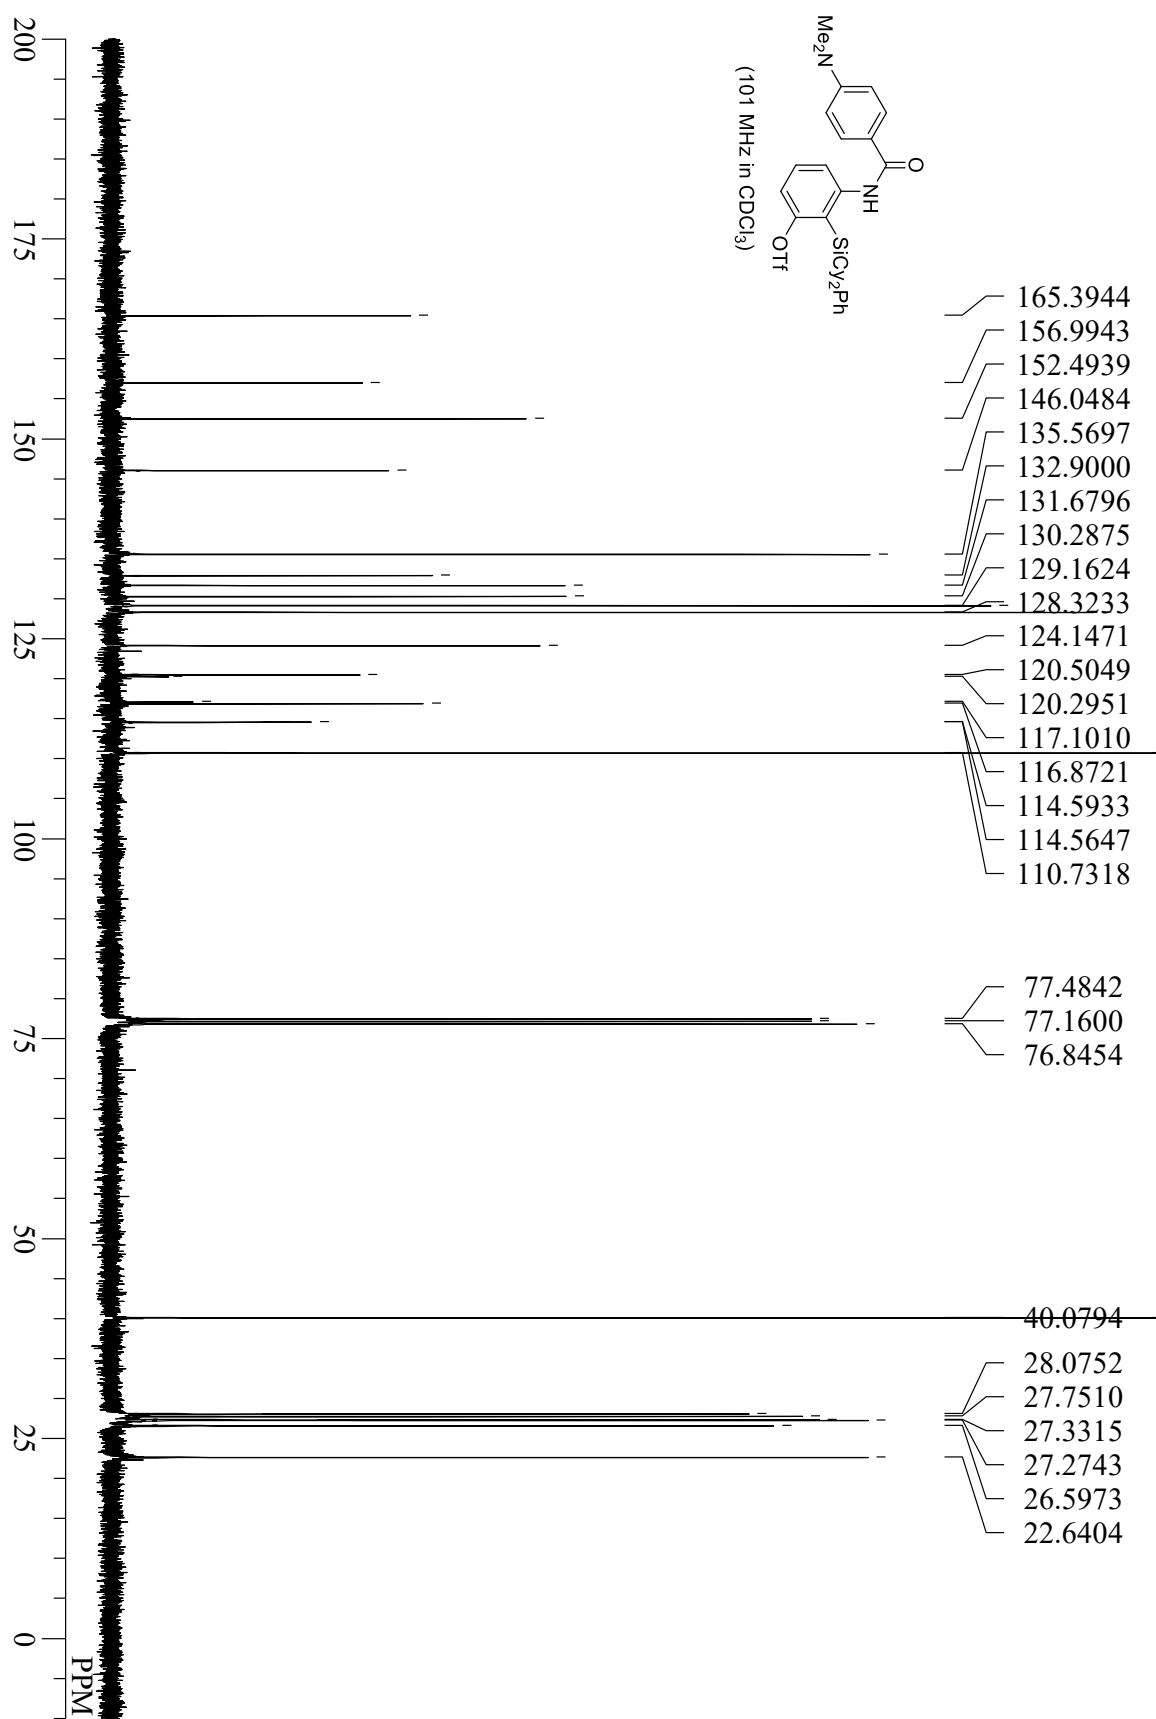

compound 1x

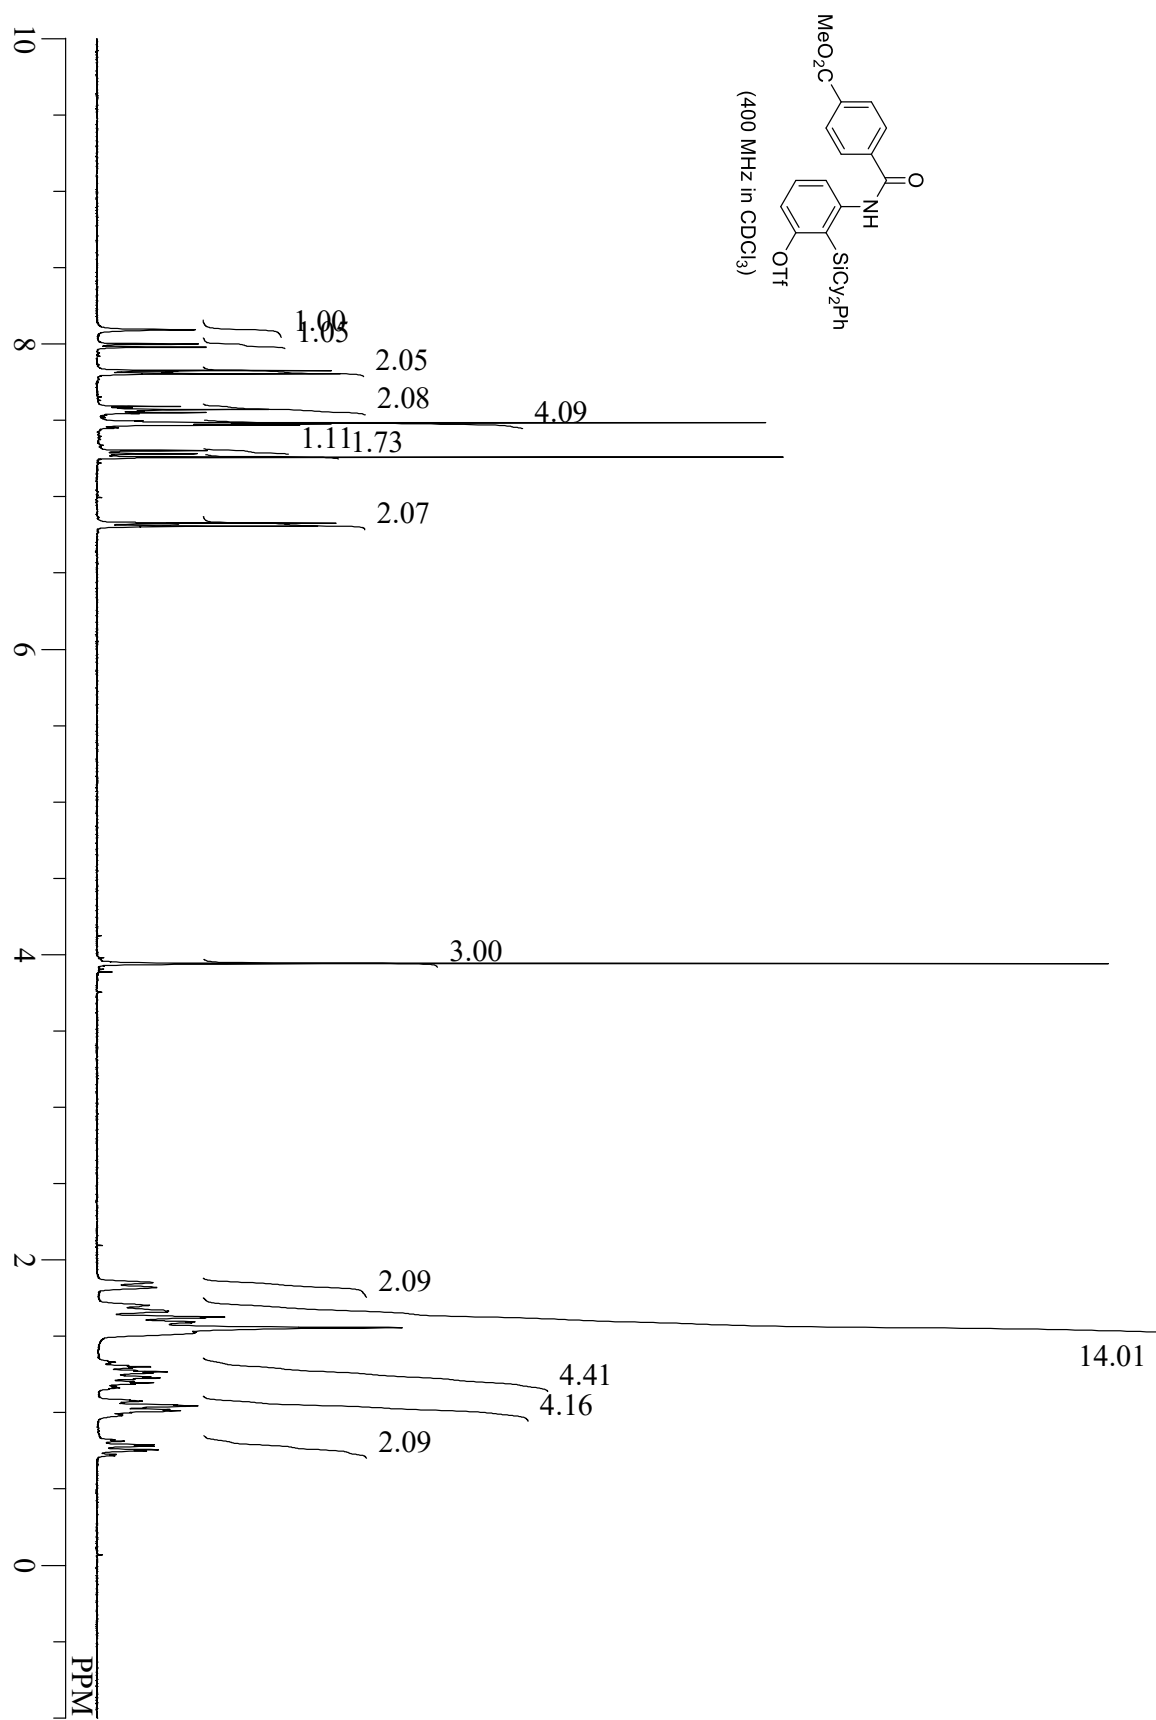

compound 1x

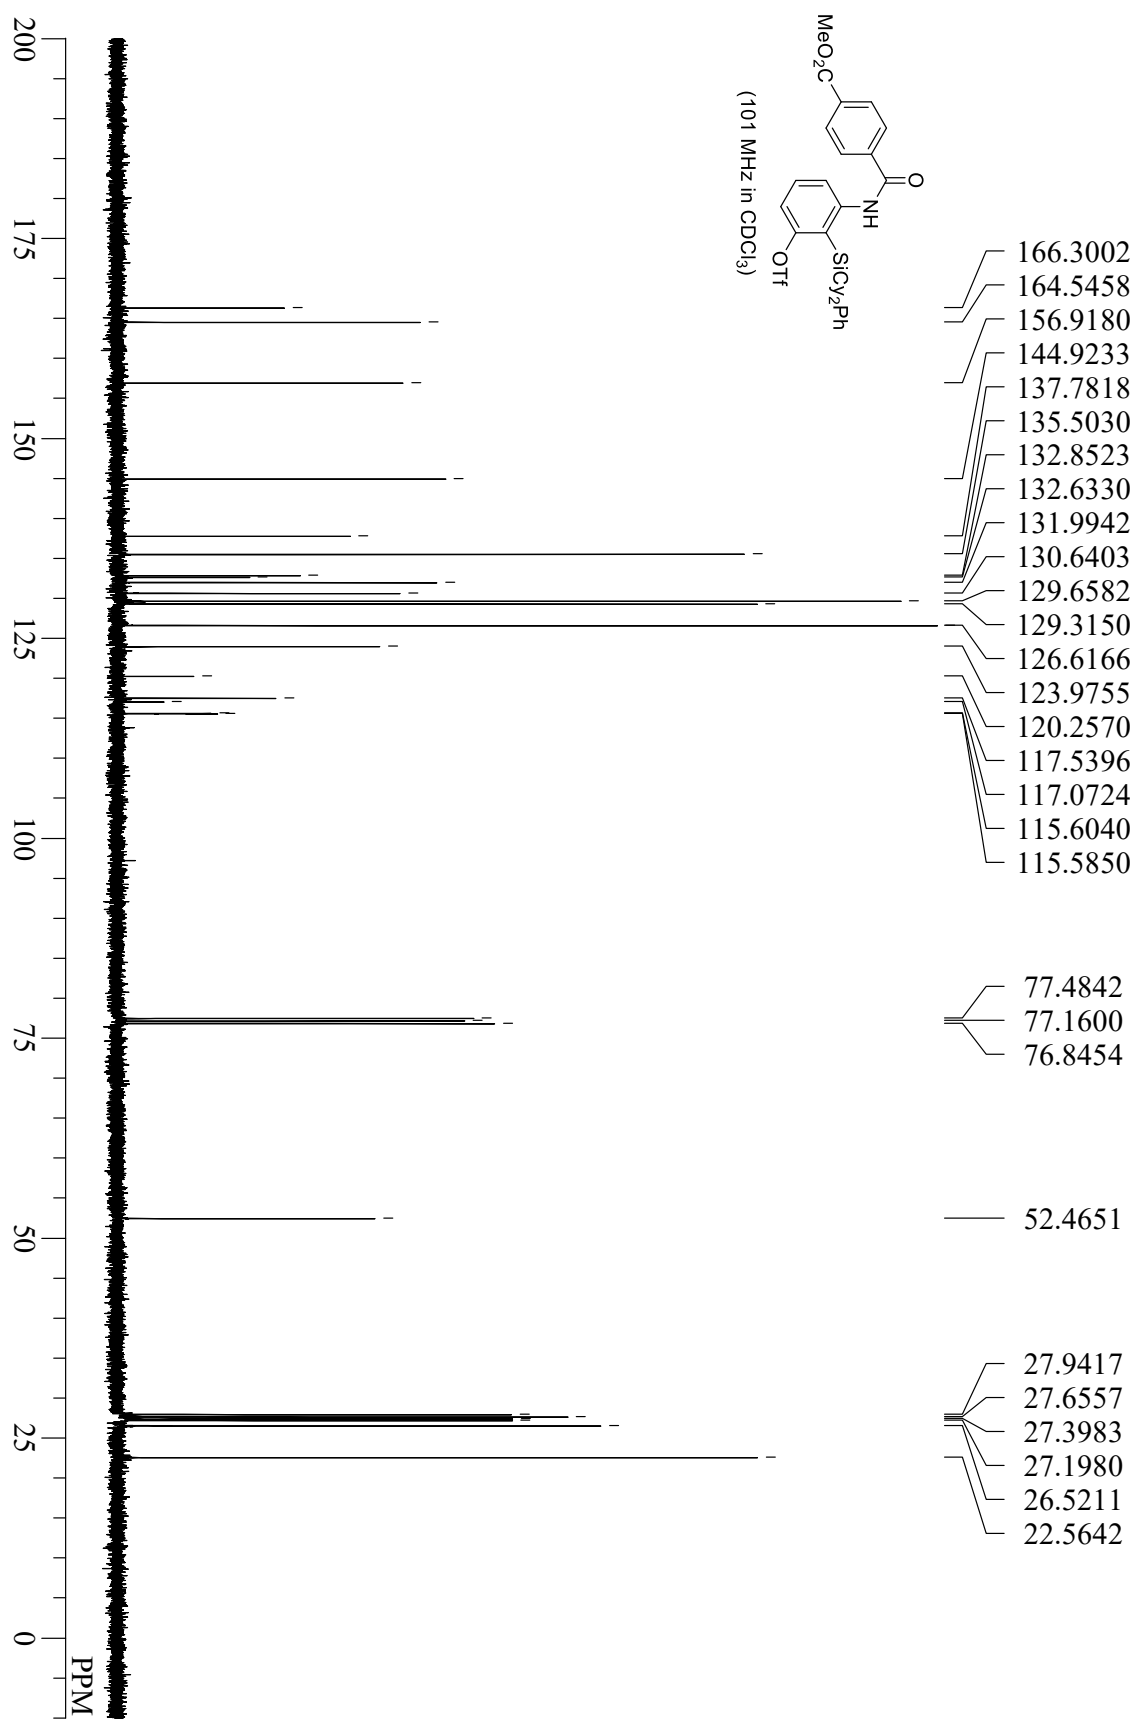

compound 1y

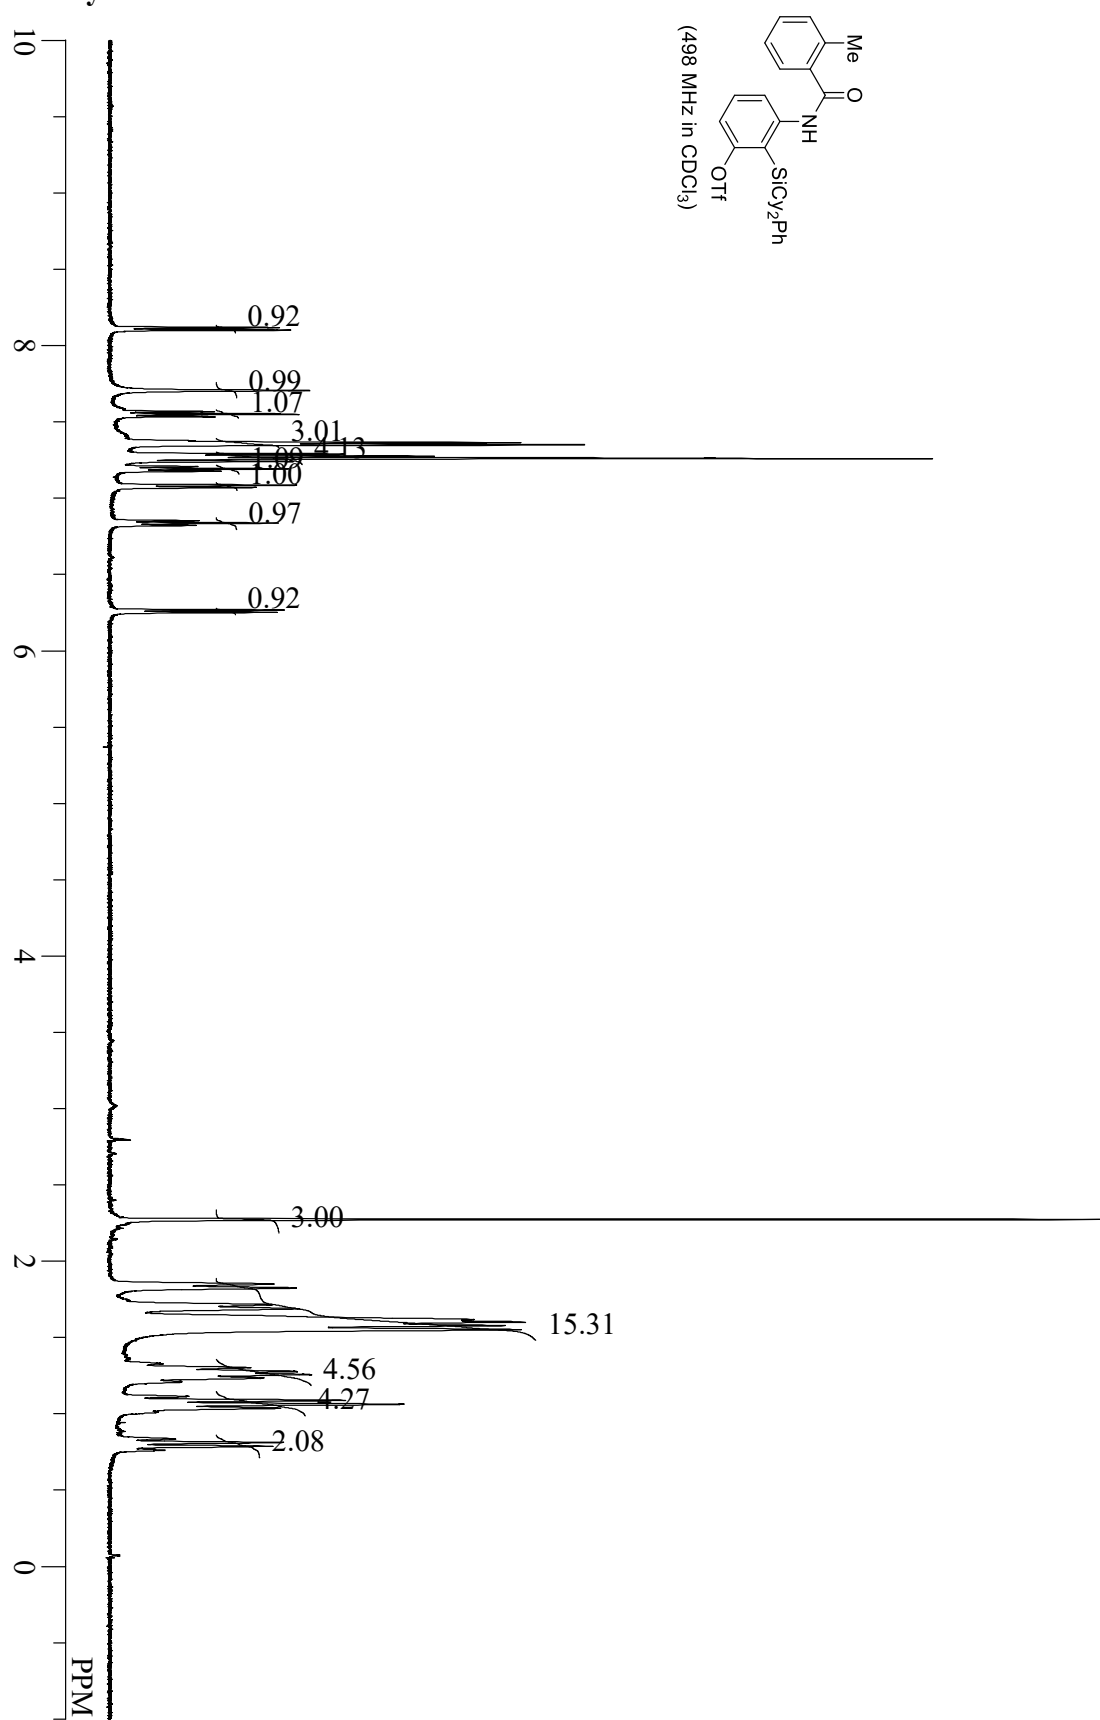

compound 1y

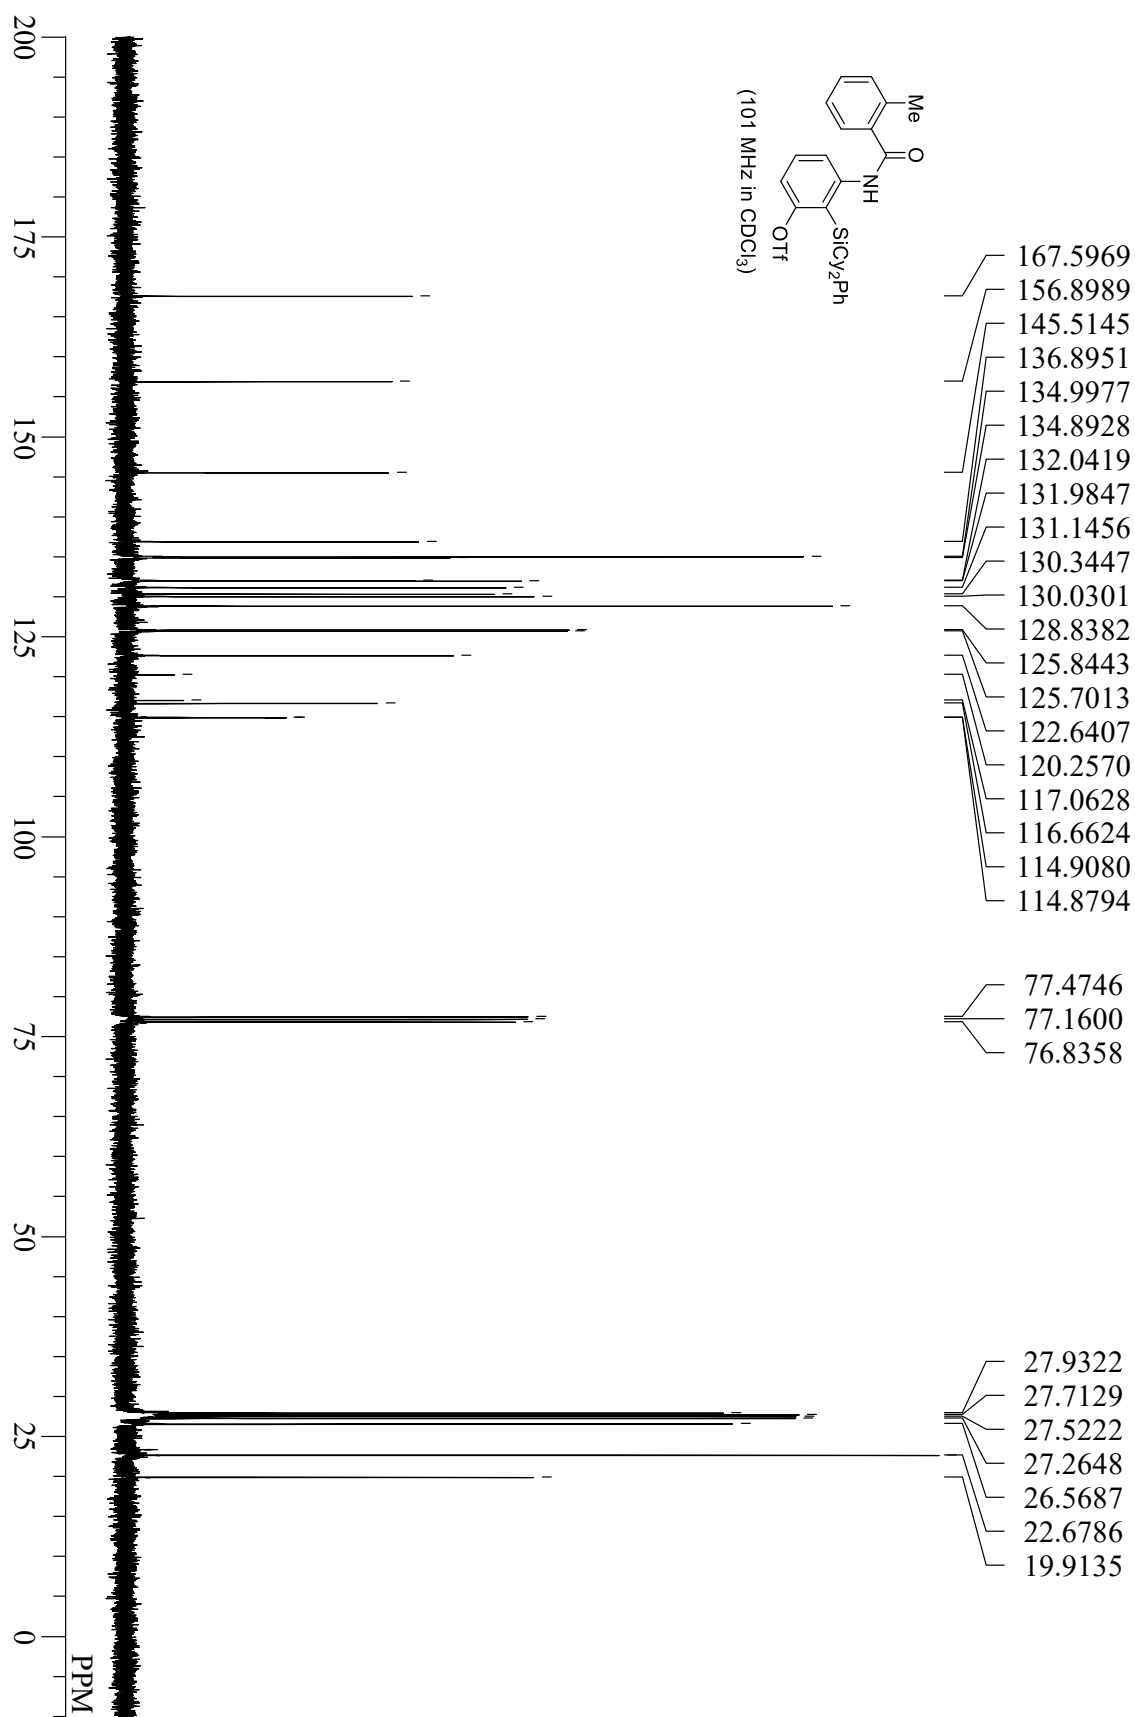

compound 1z

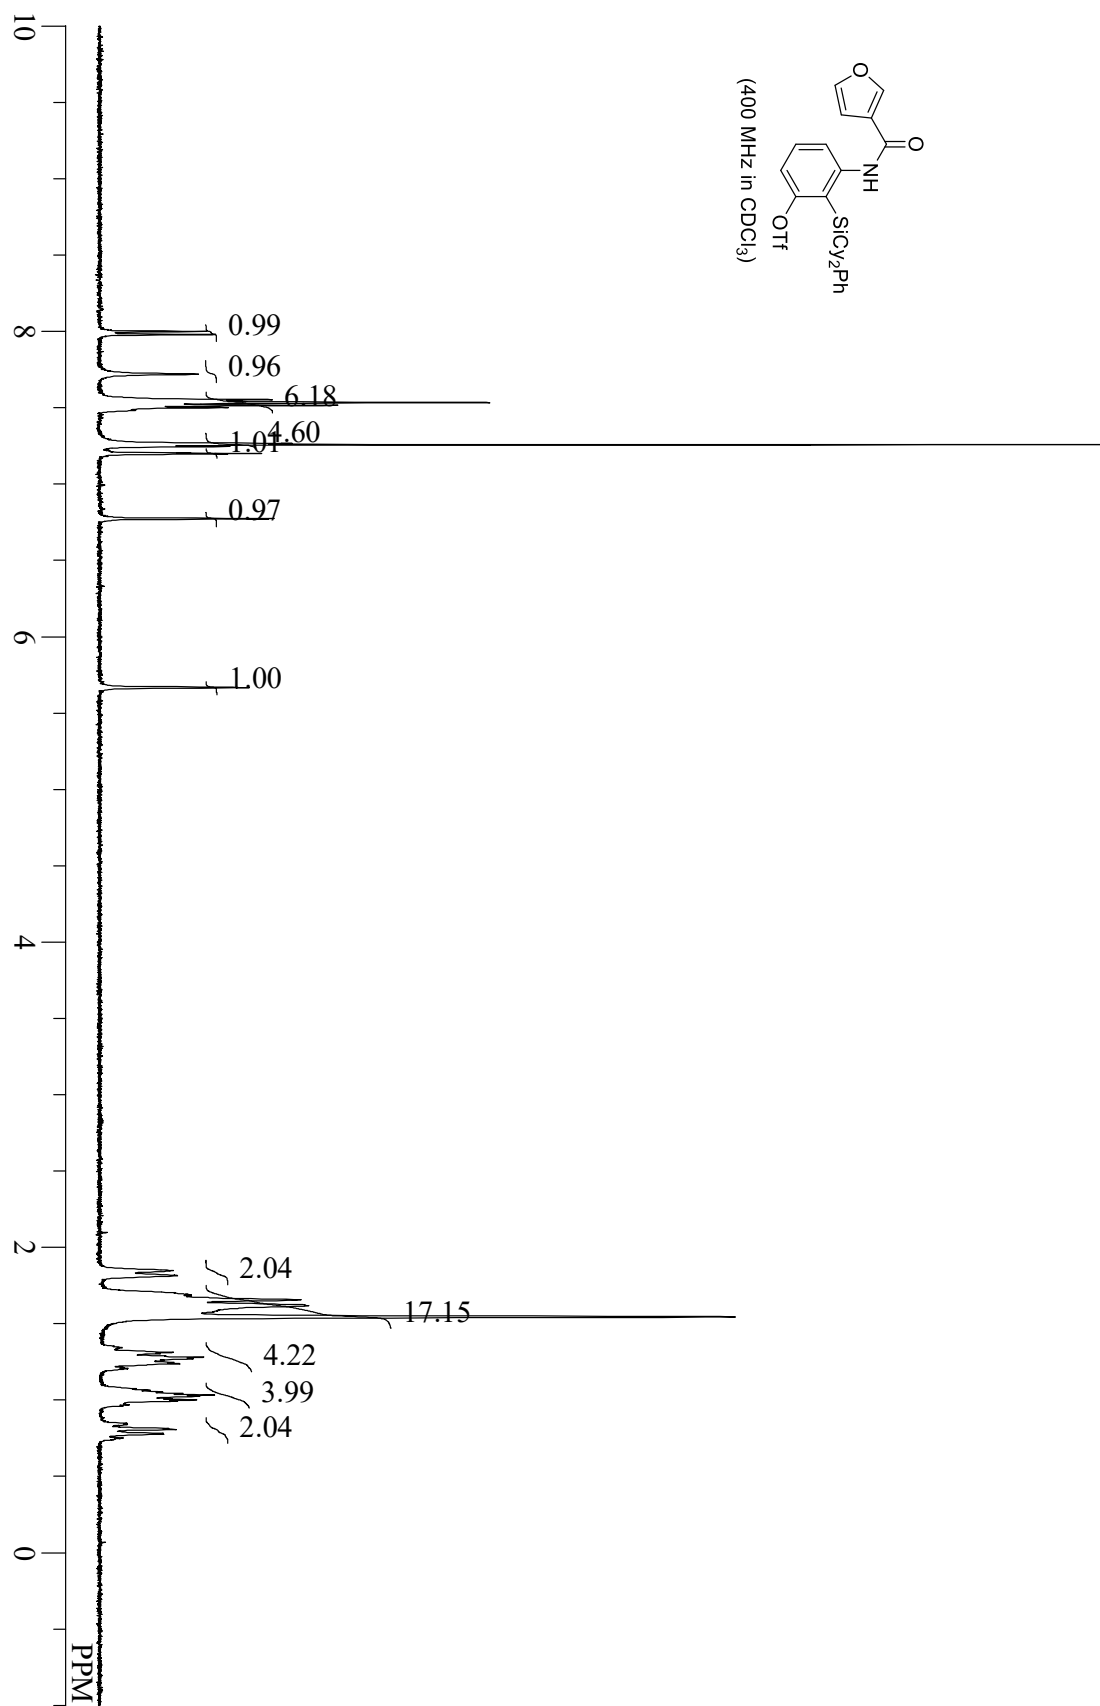

compound 1z

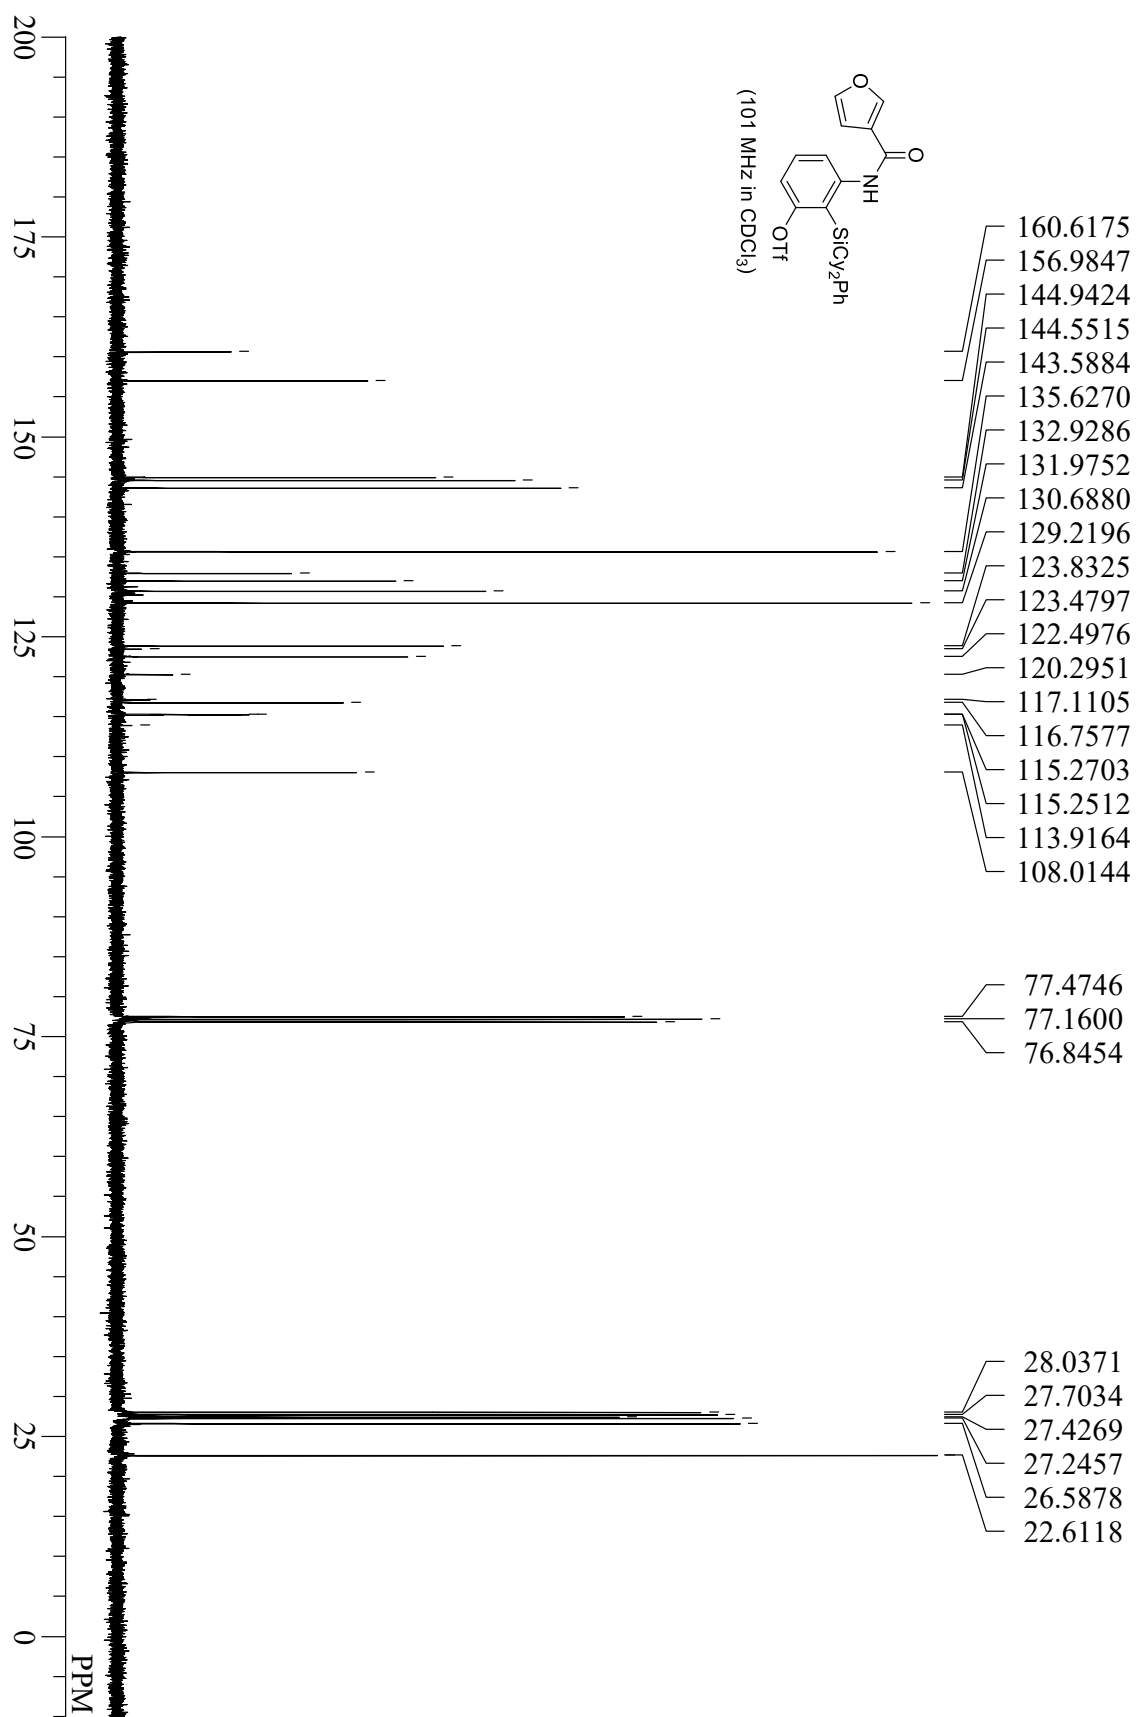



compound **1aa**

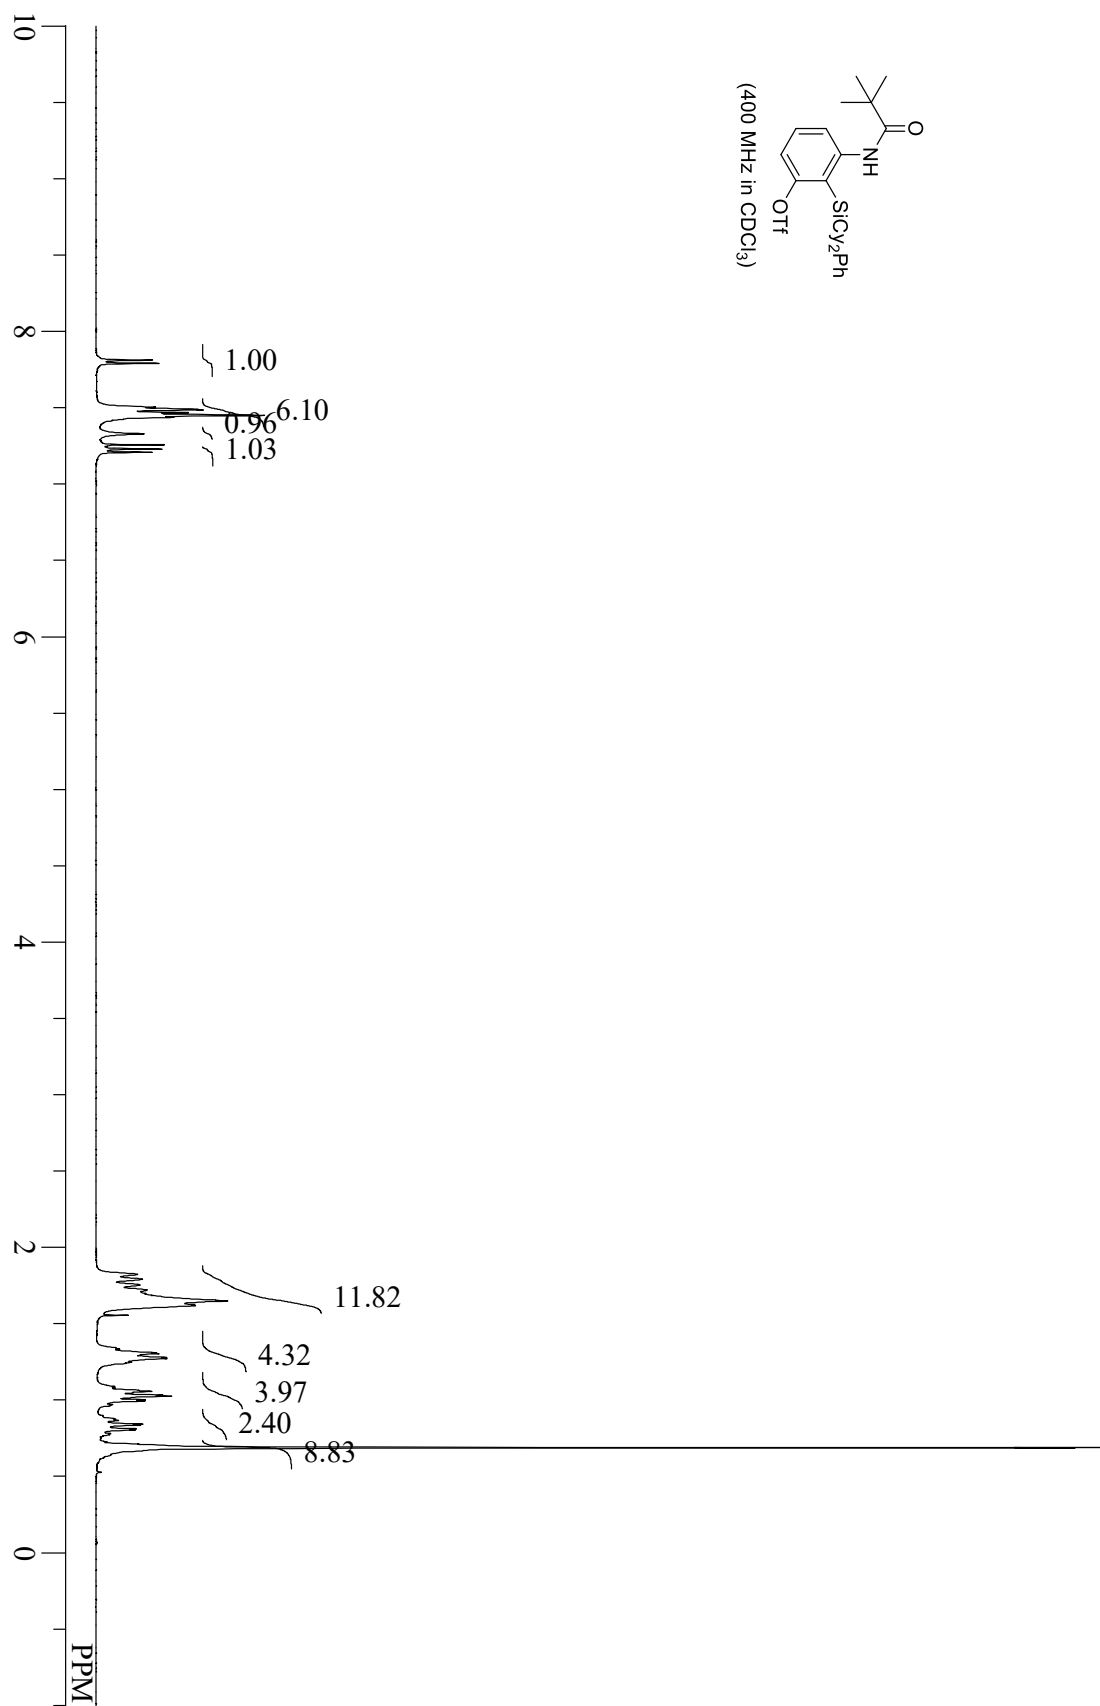

compound **1aa**

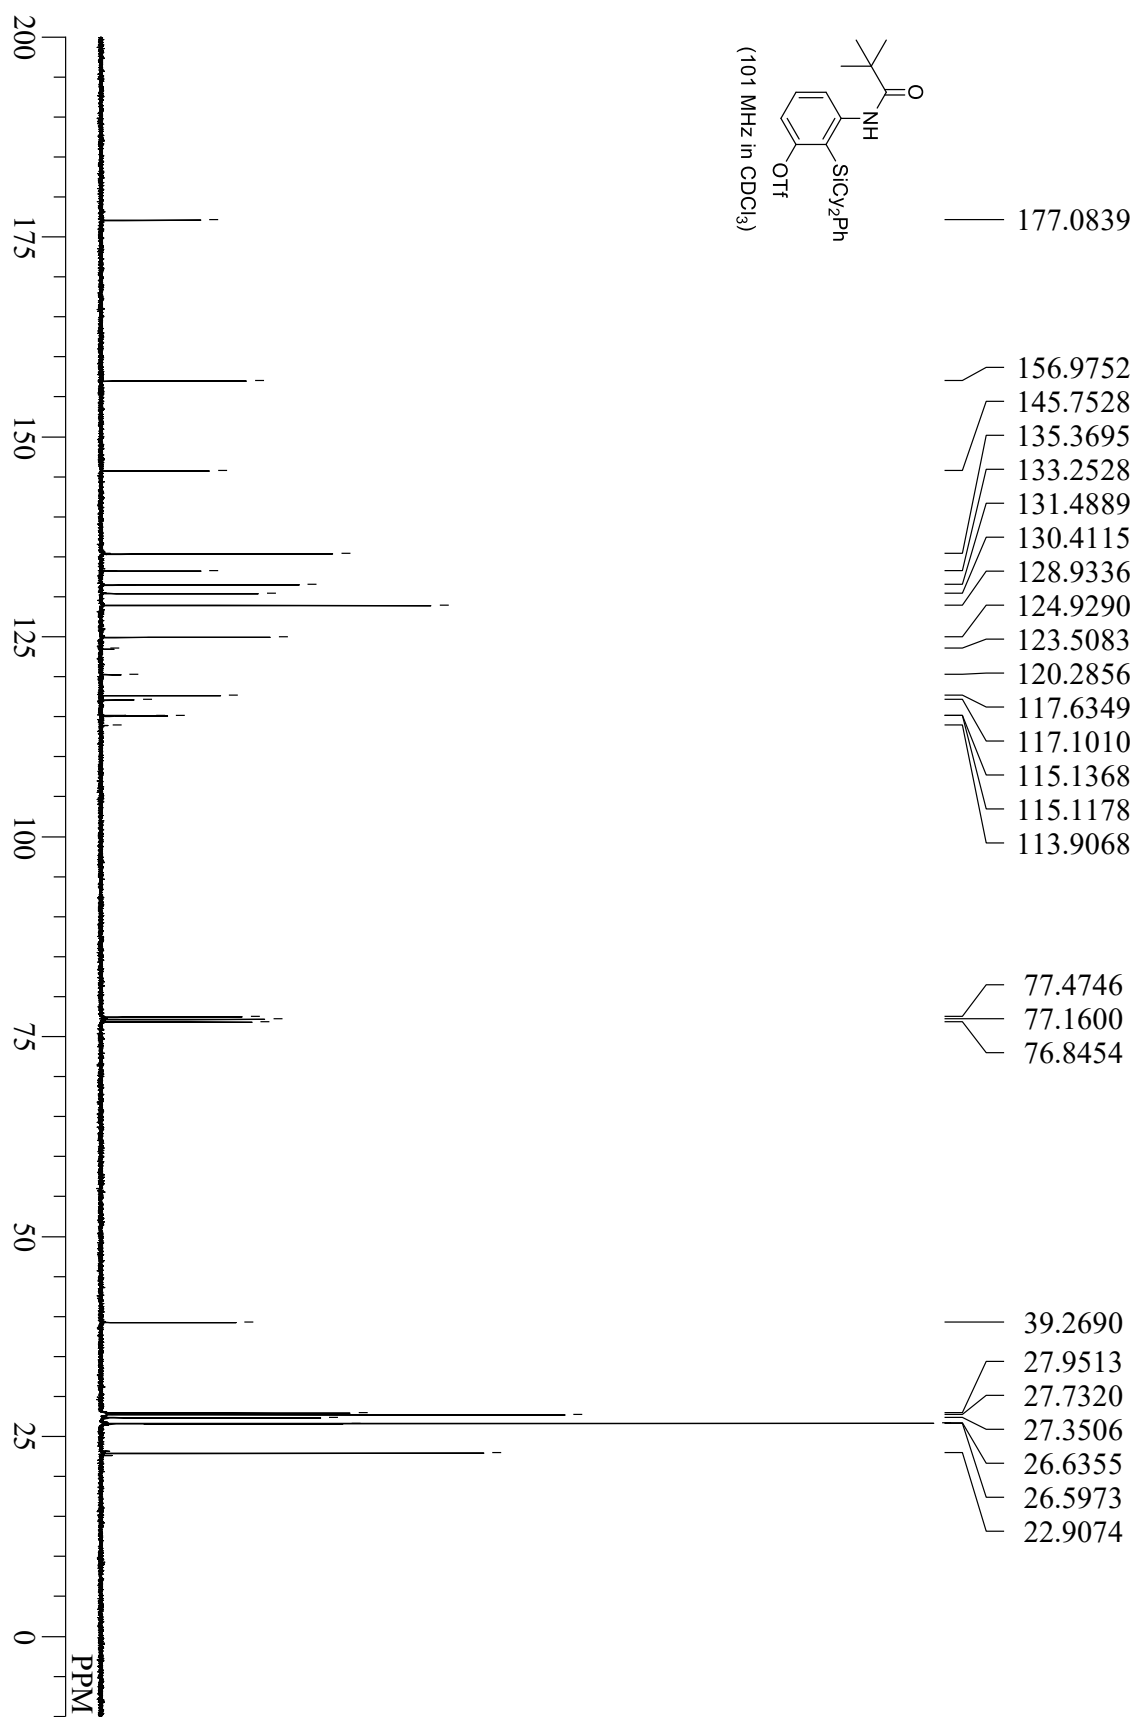

compound **1bb**

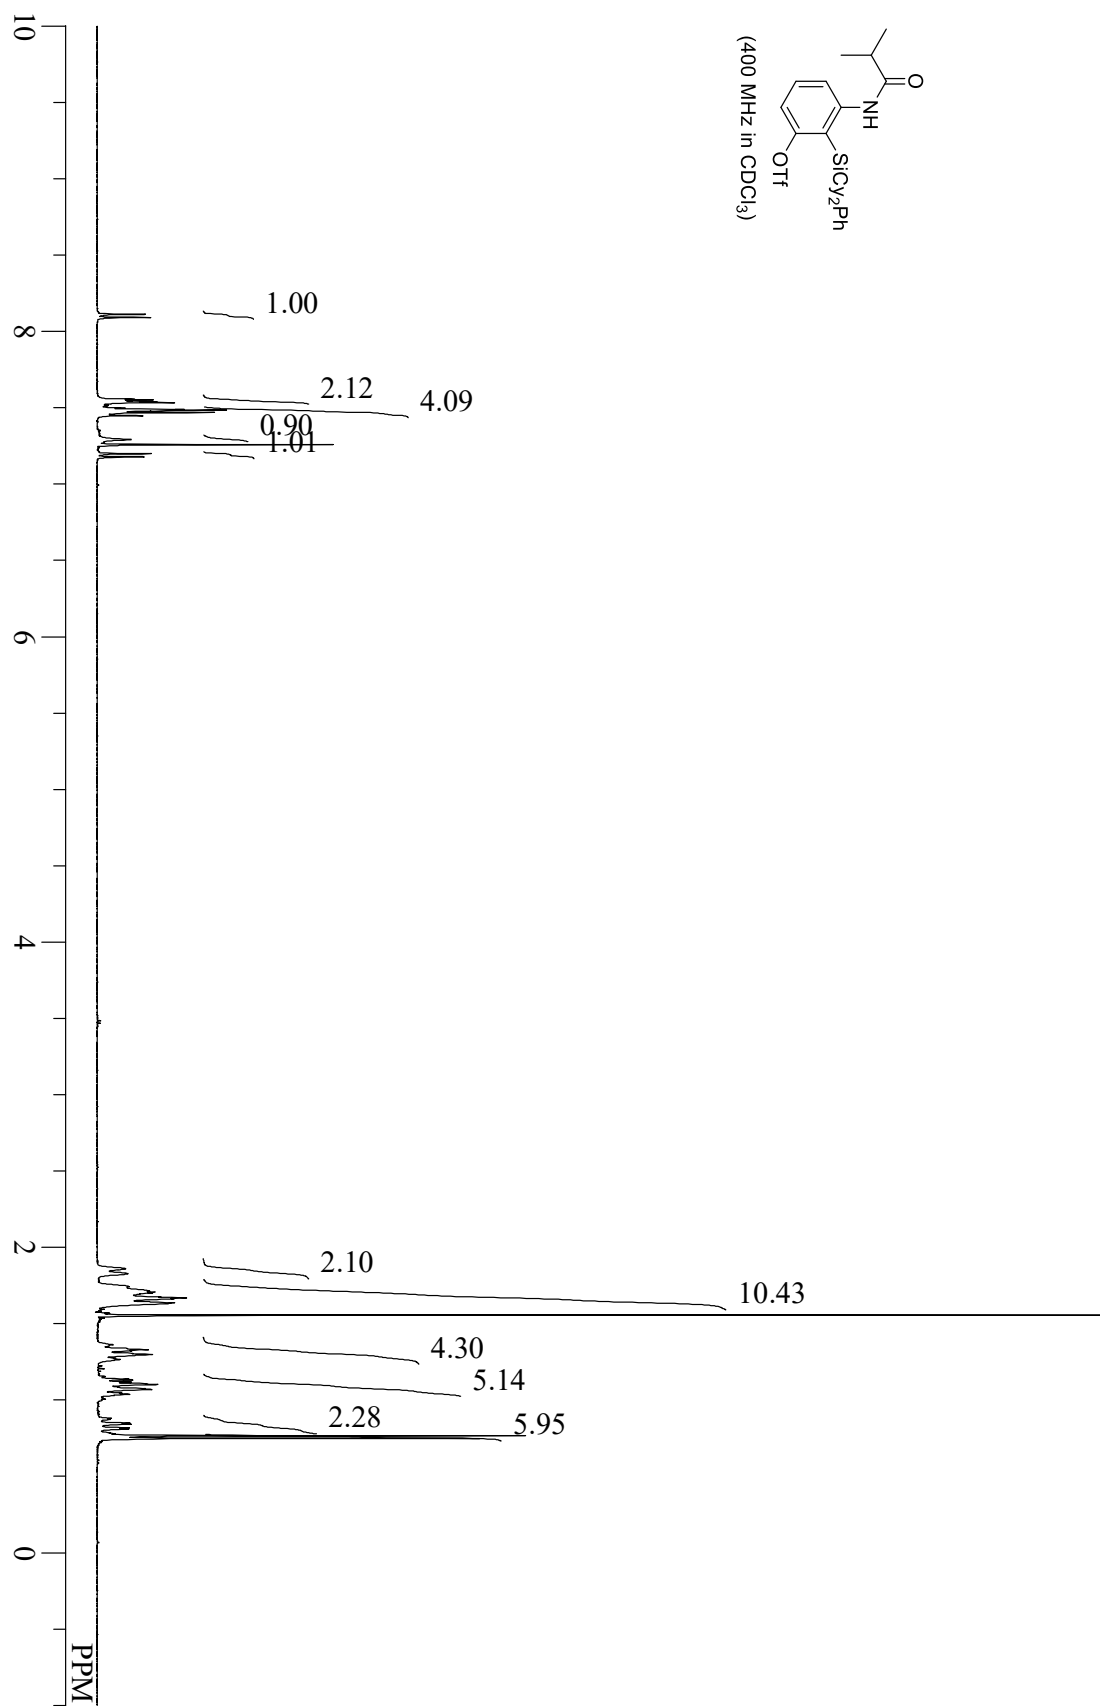

compound **1bb**

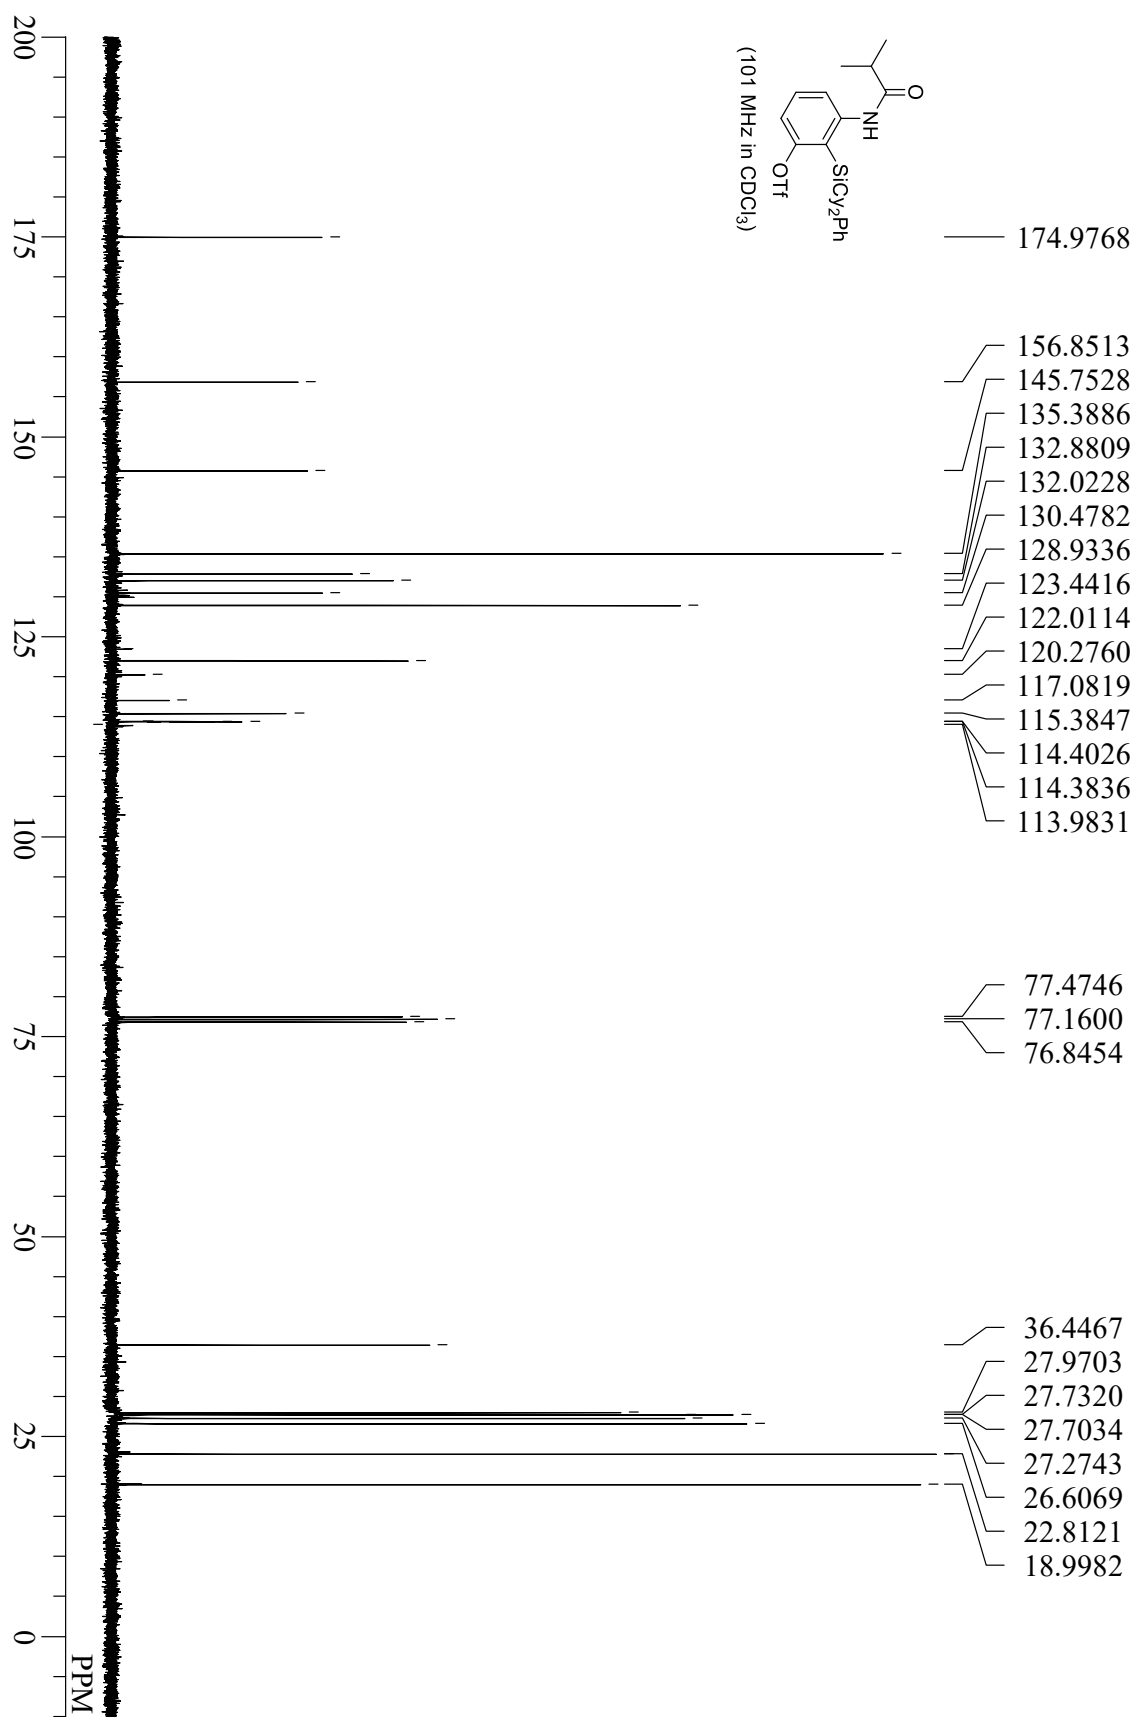

compound **1cc**

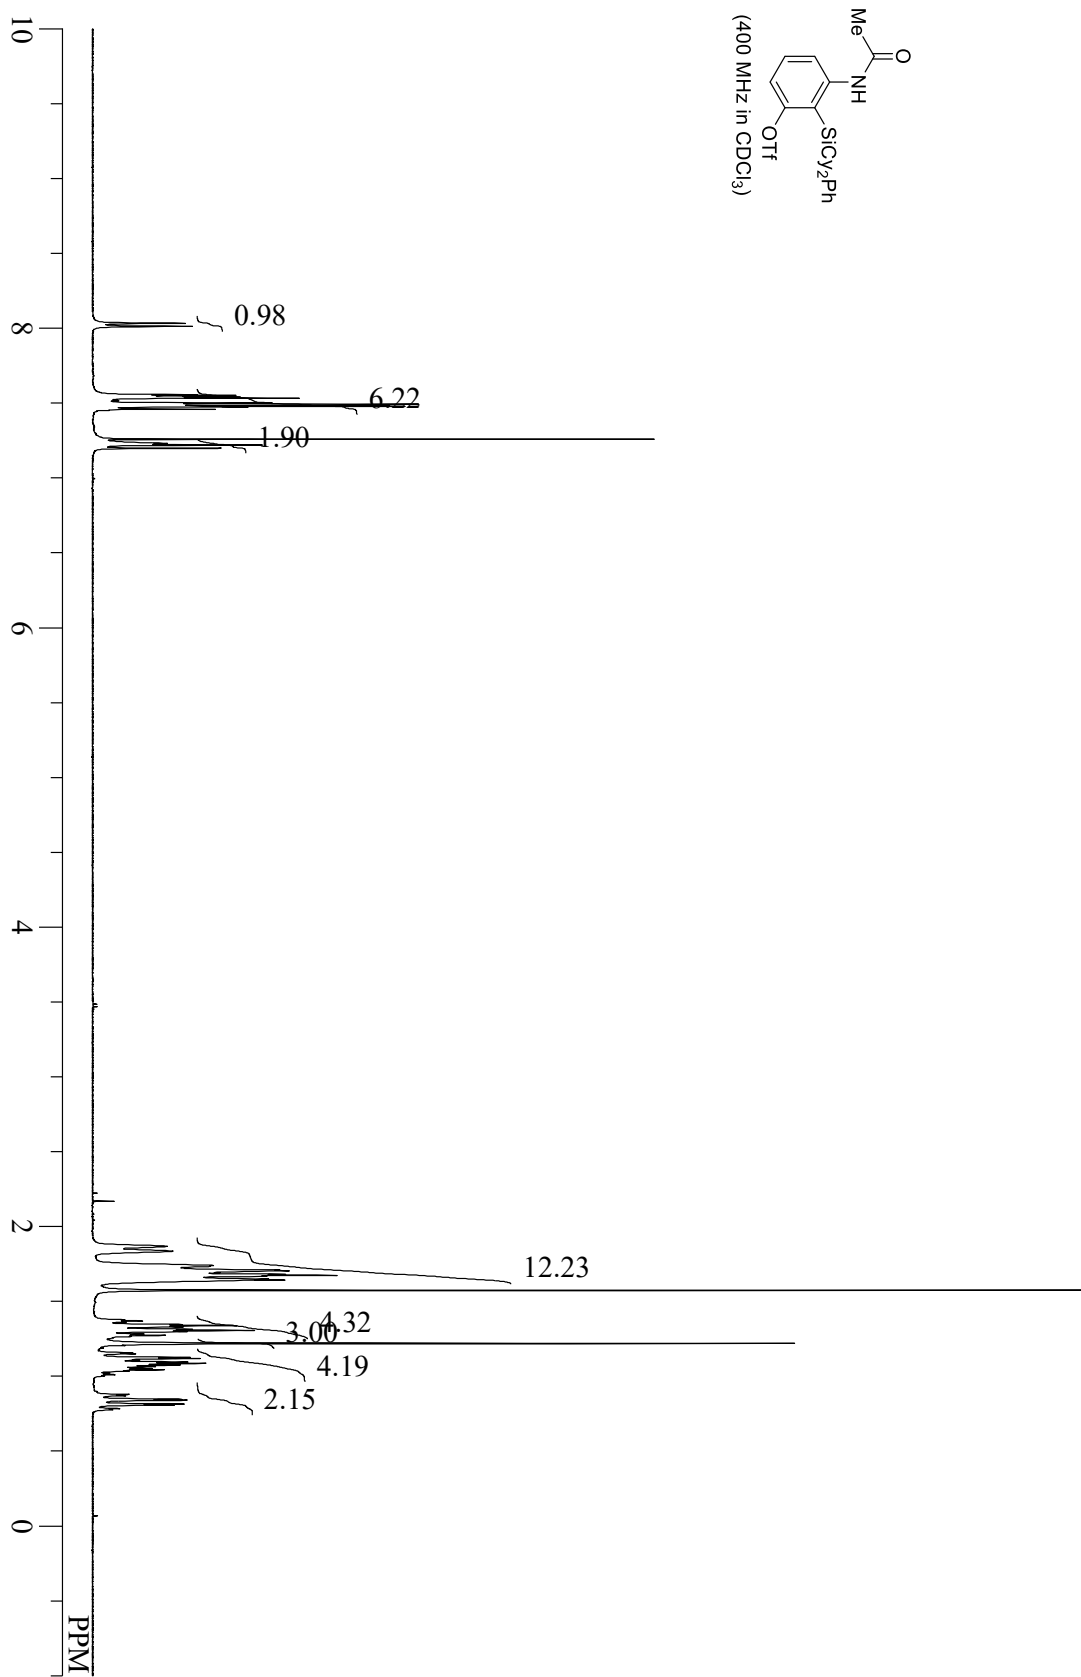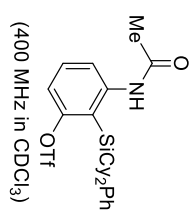

compound **1cc**

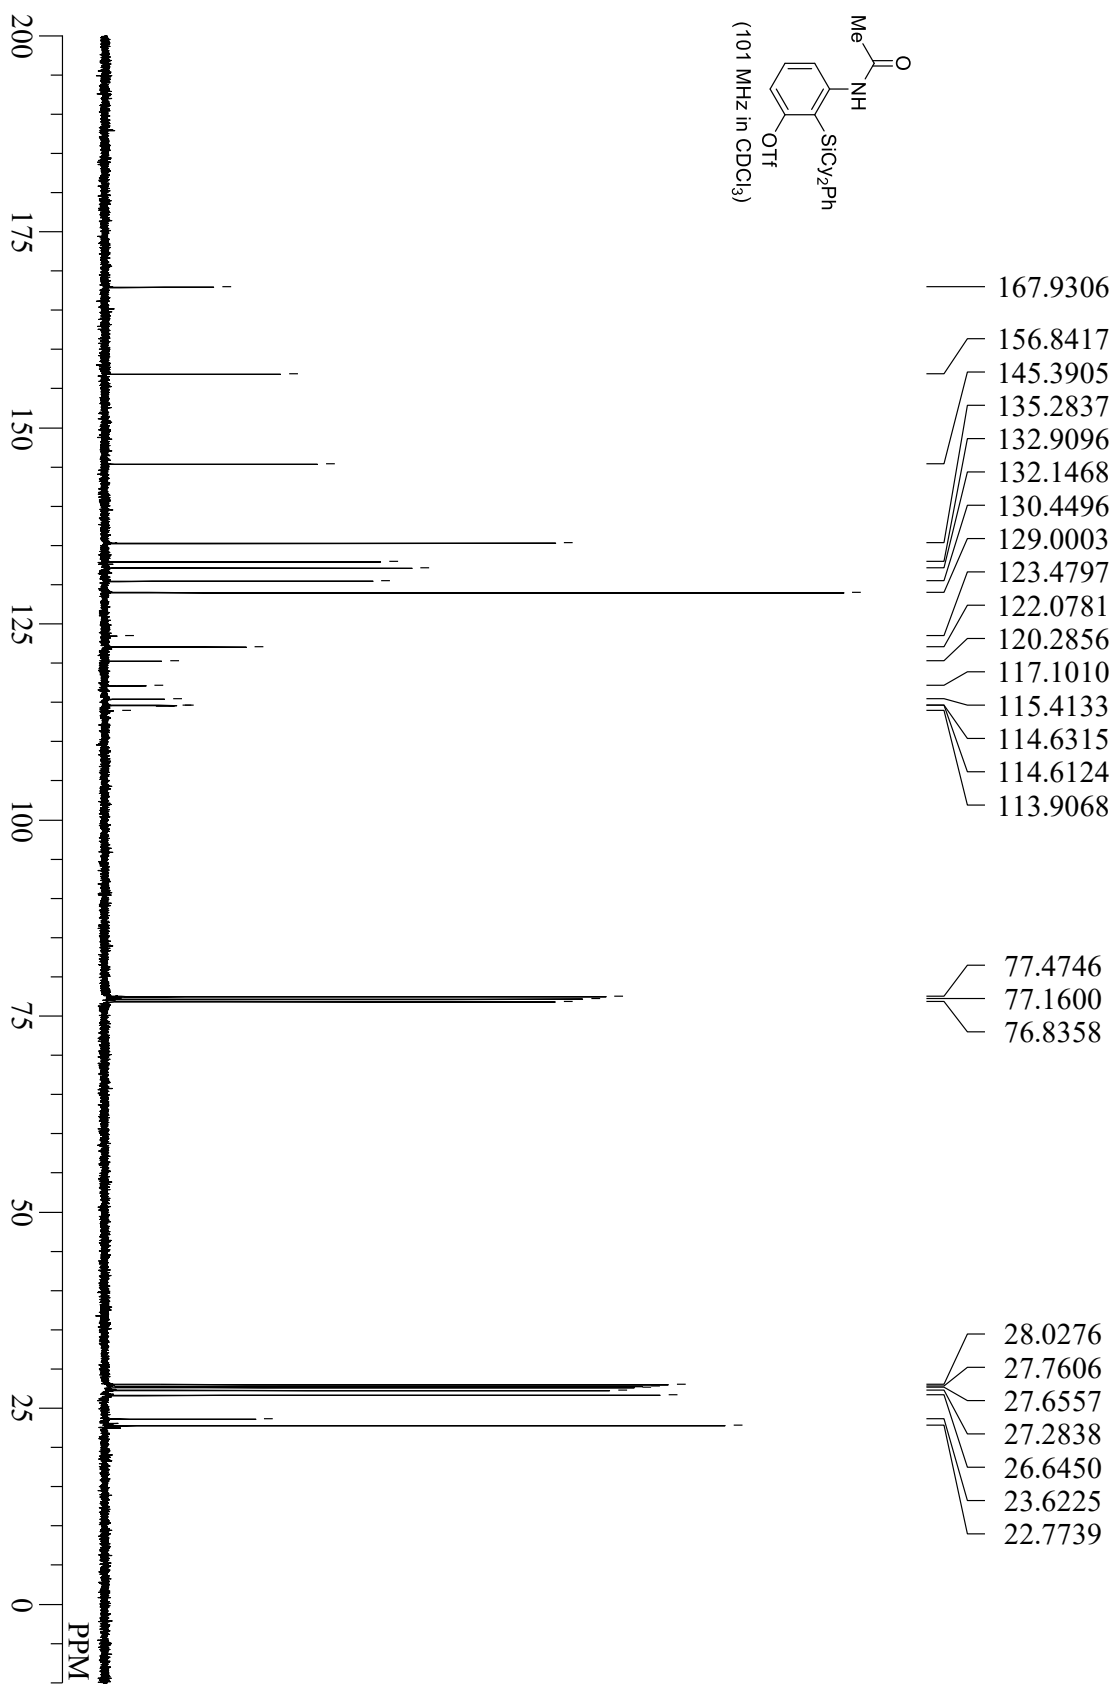

compound **1dd**

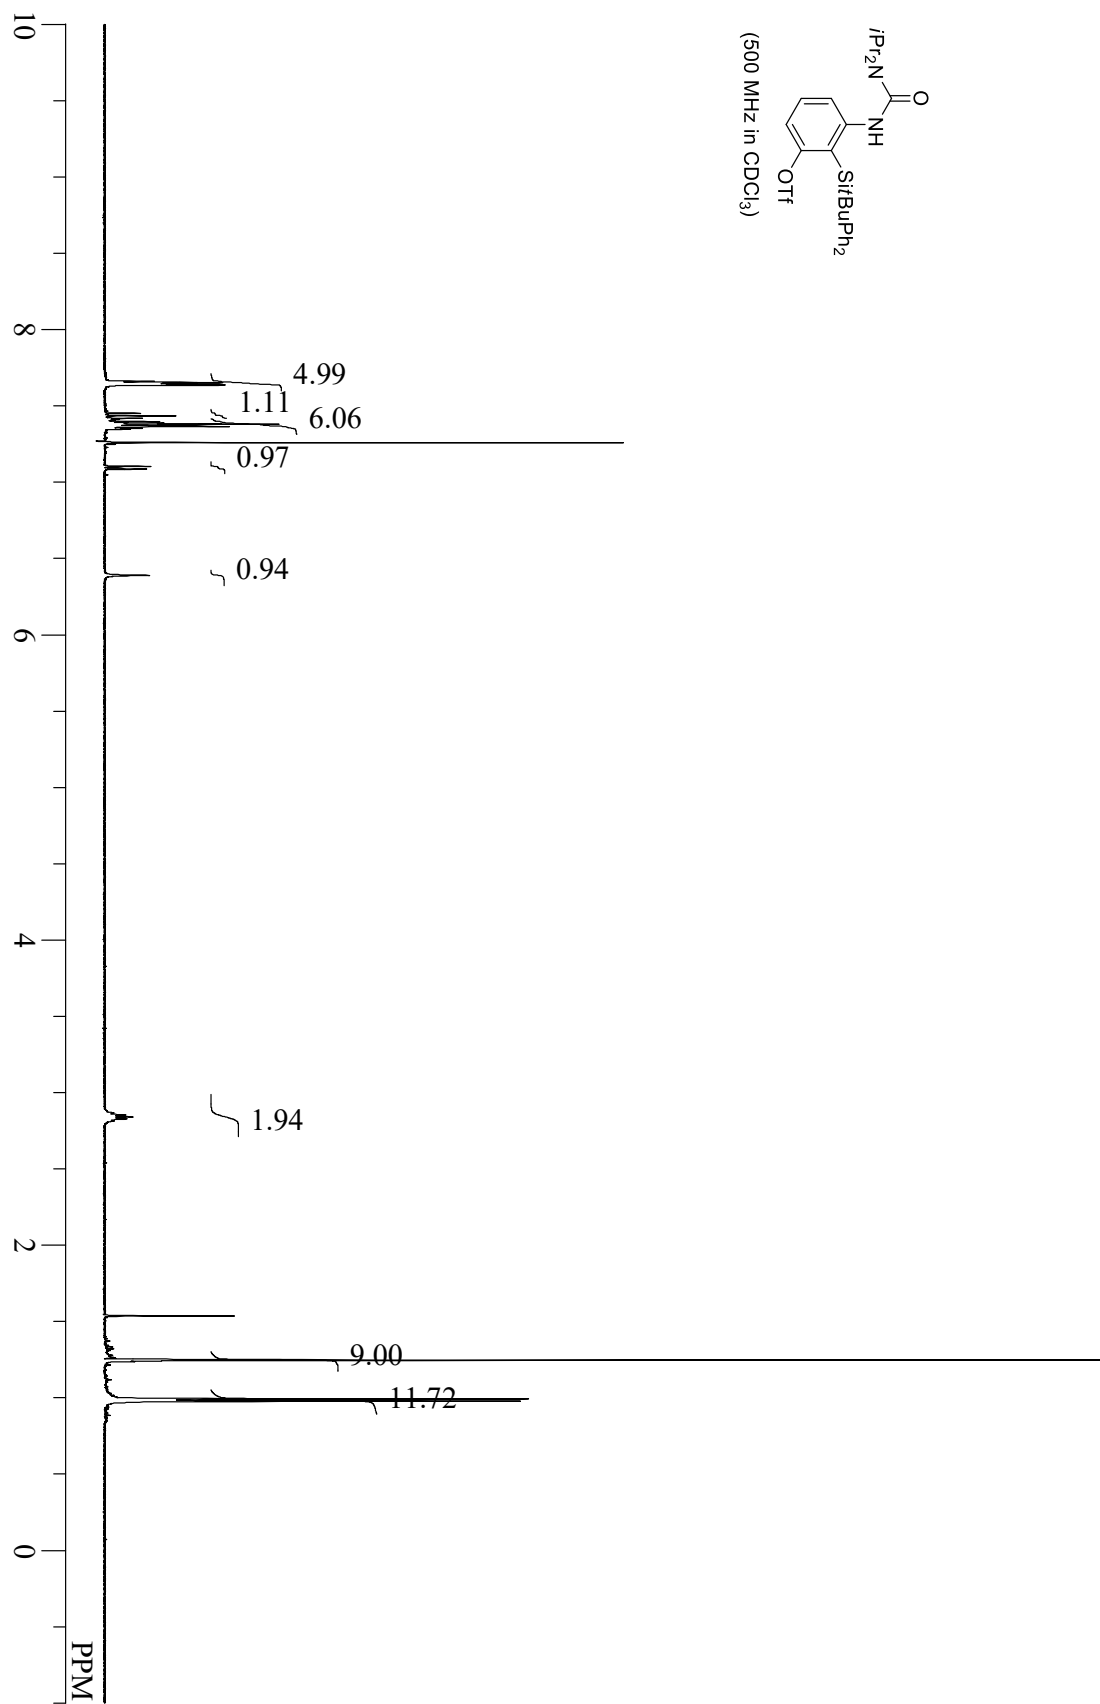

compound **1dd**

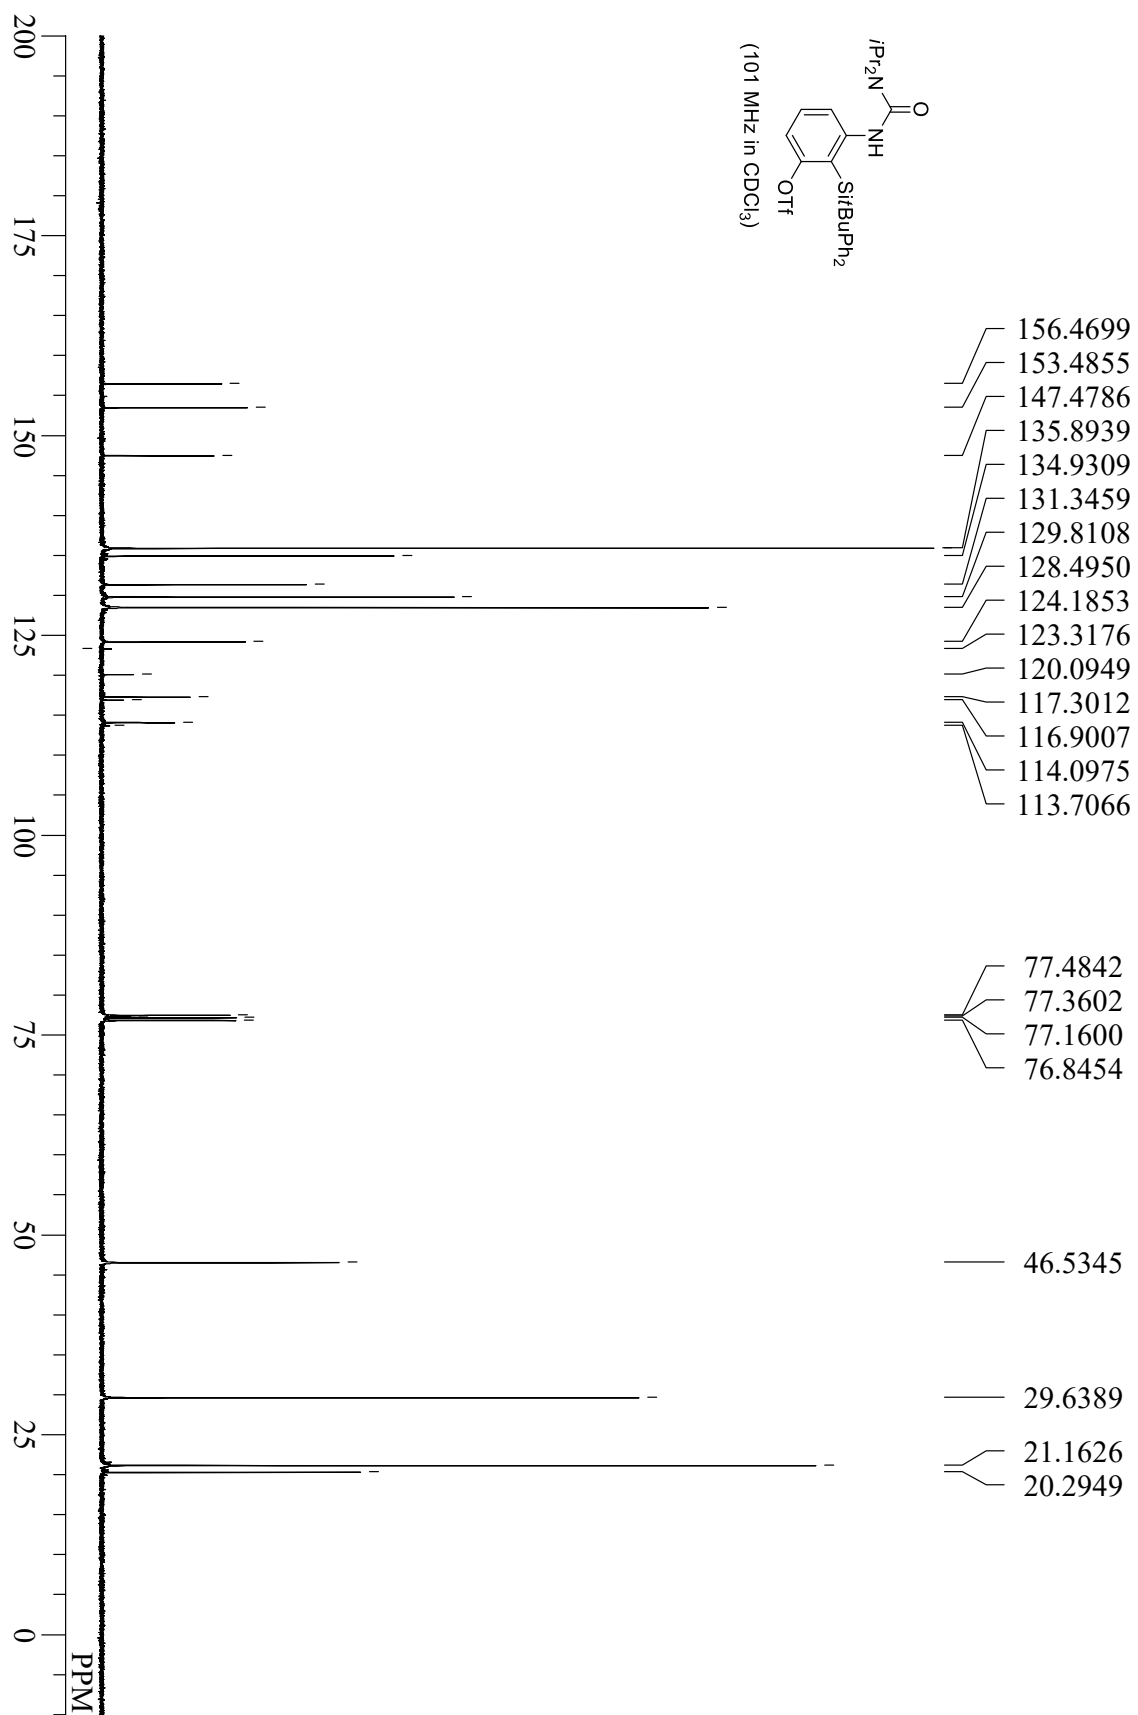



compound **1ee**

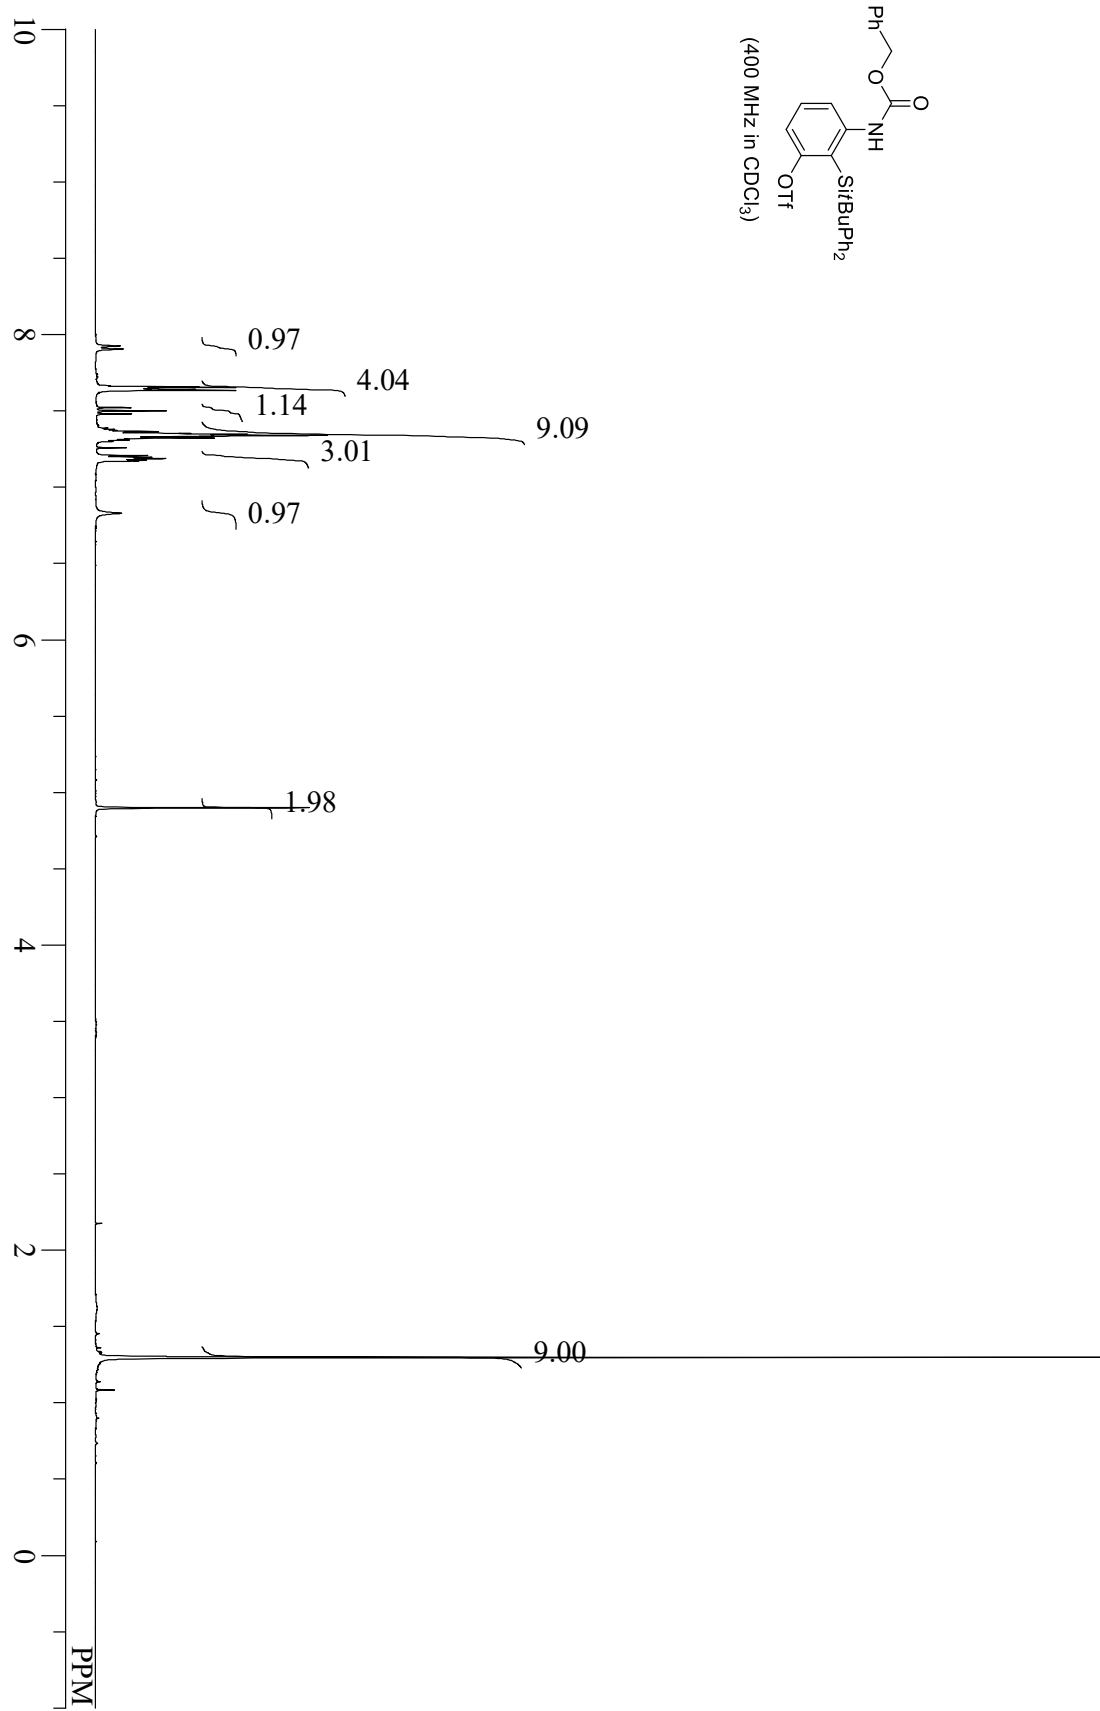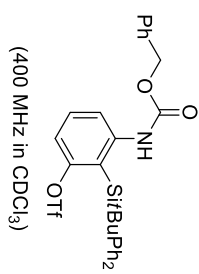

compound **1ee**

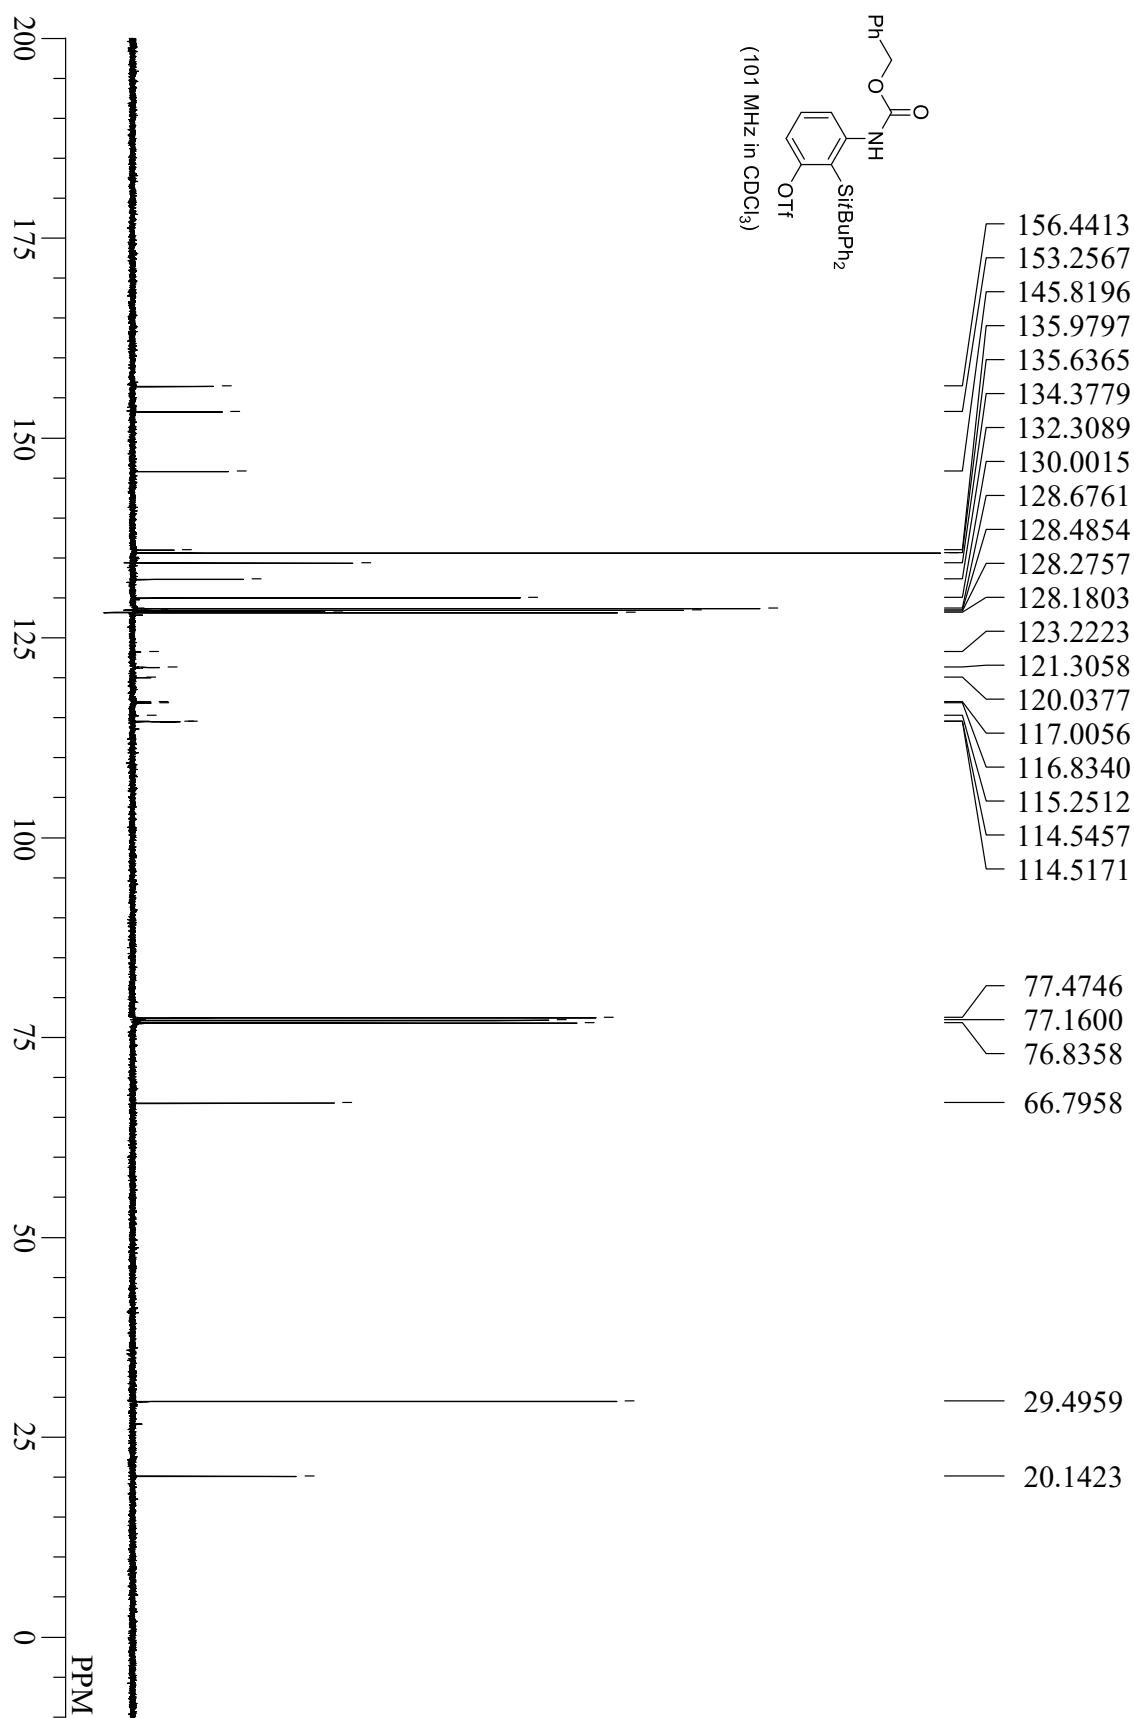

compound **1ff**

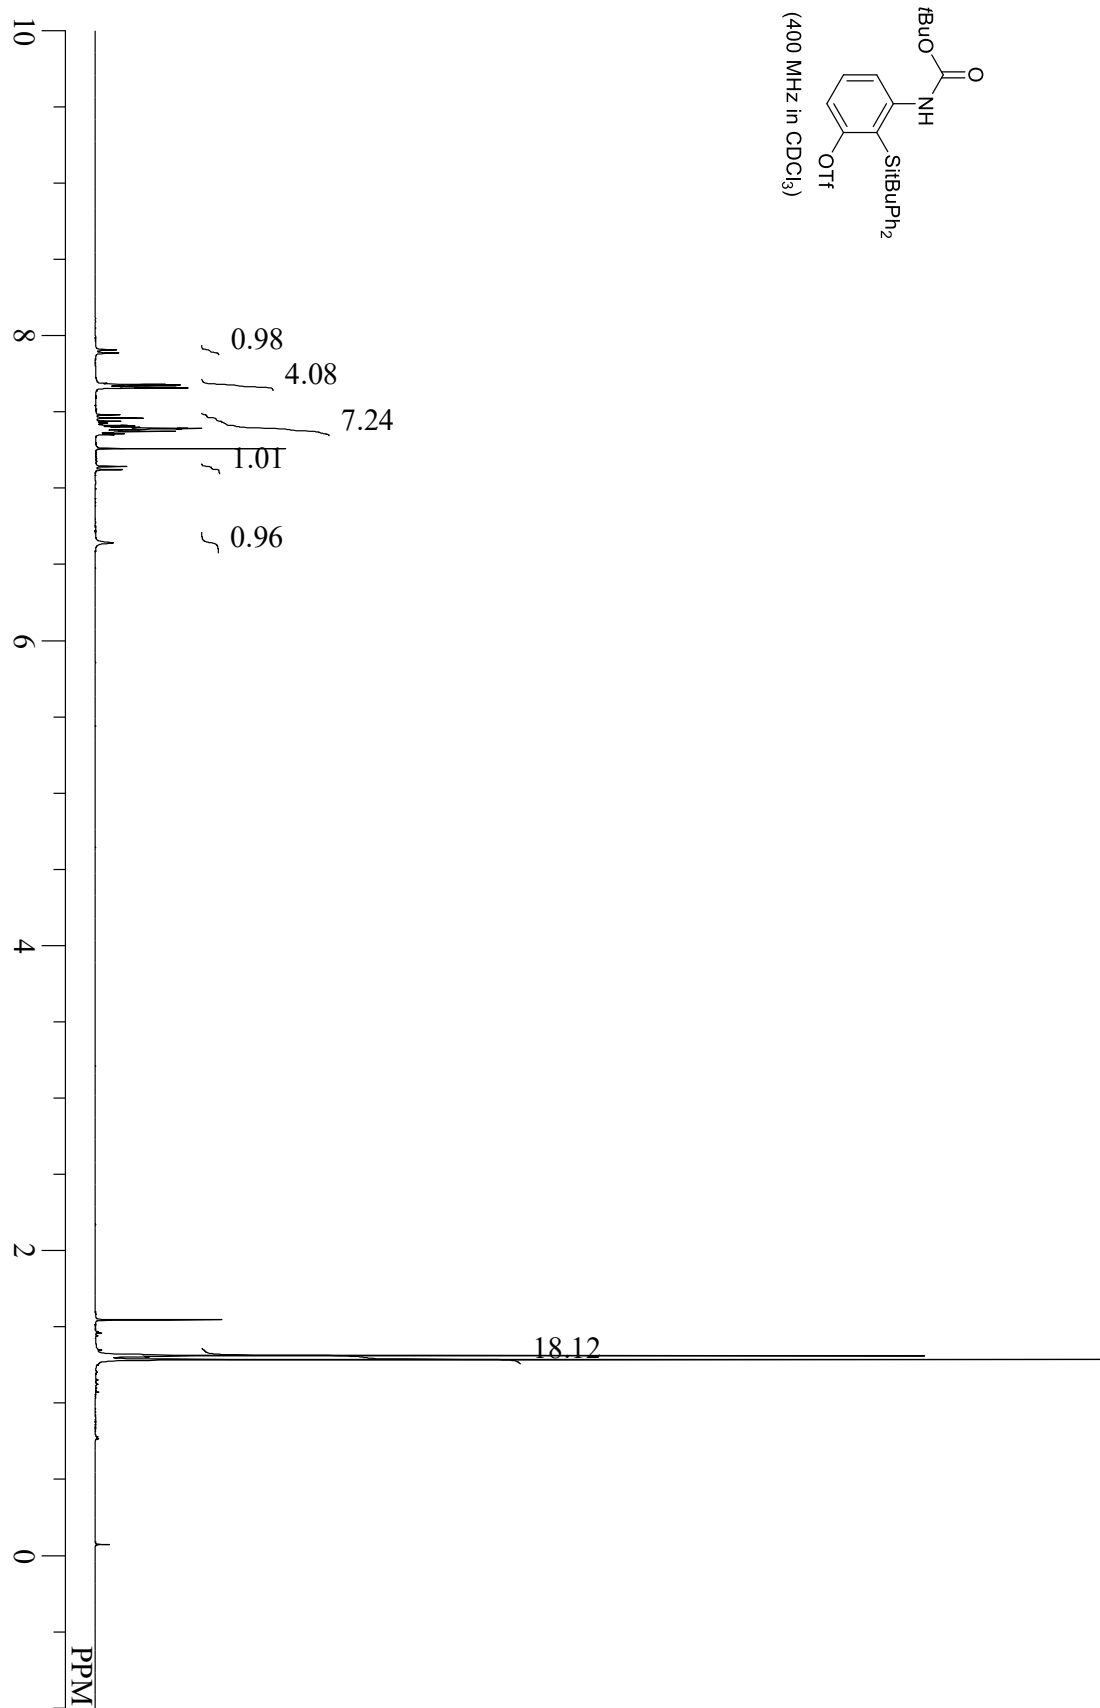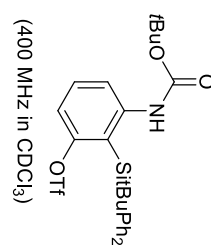

compound **1ff**

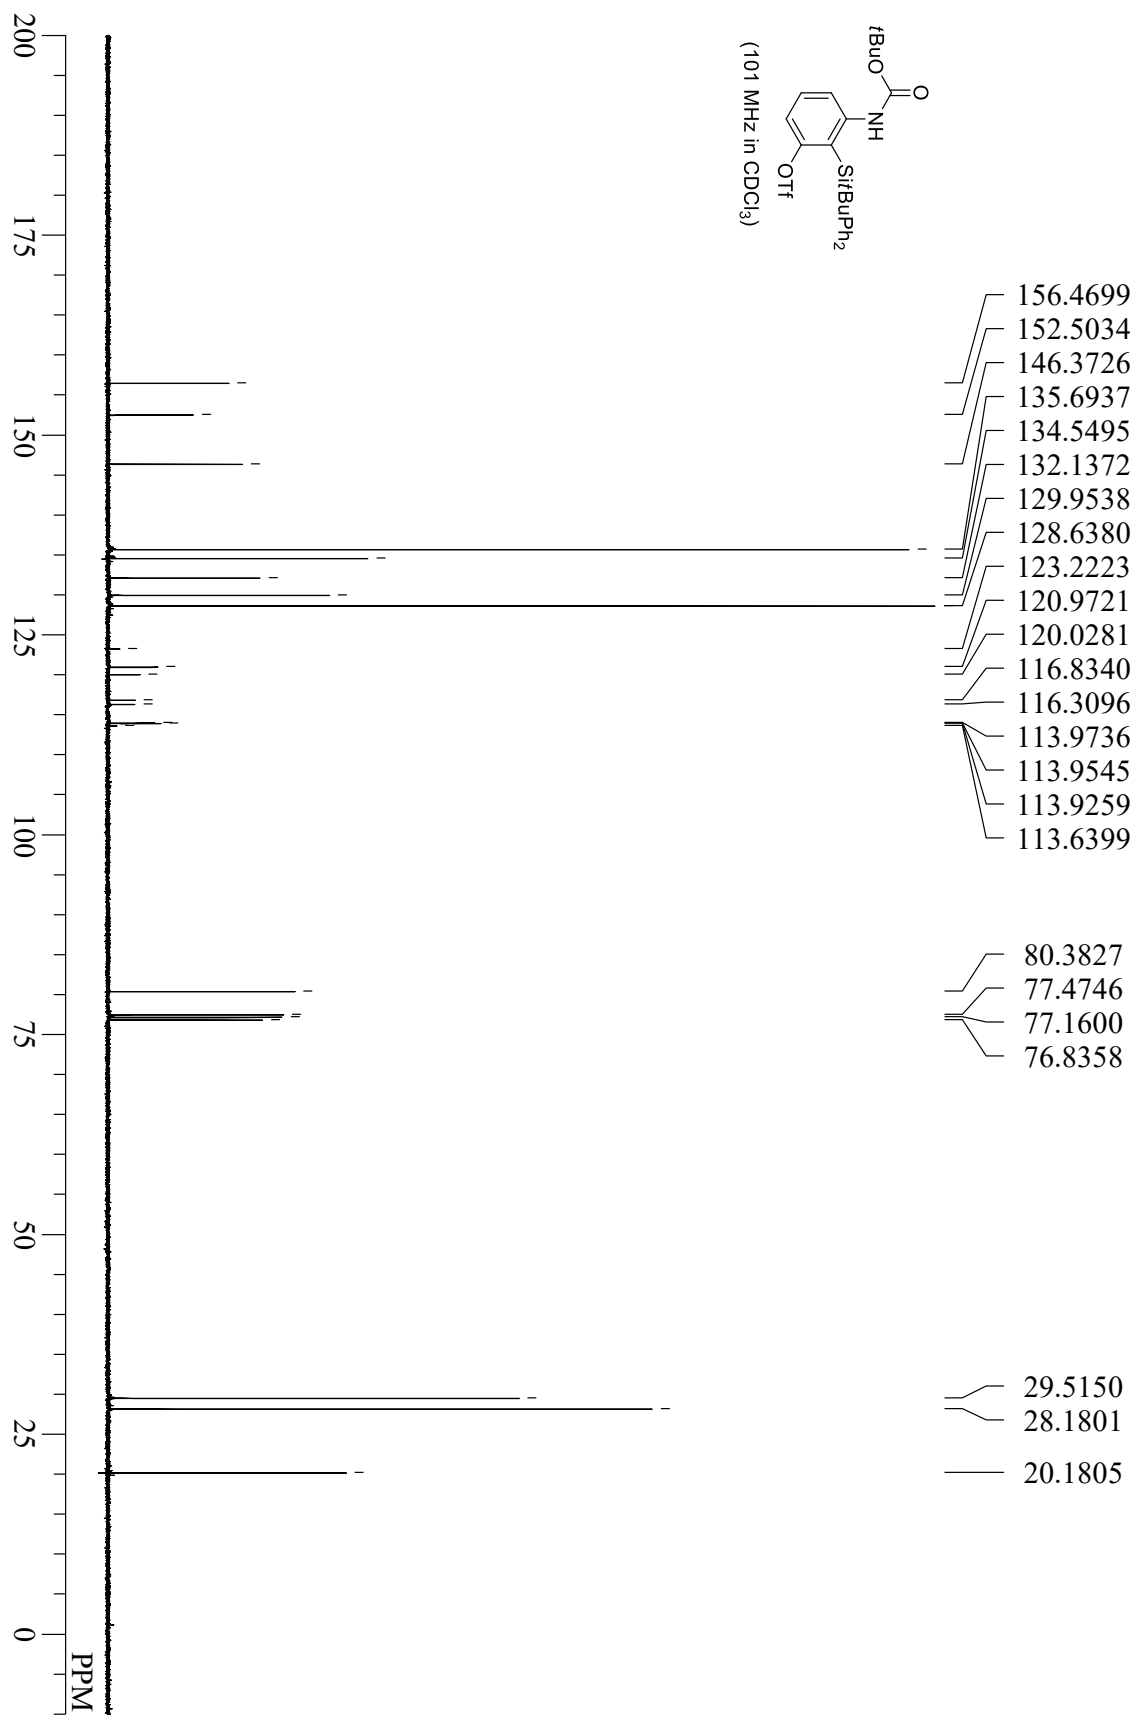

compound **1gg**

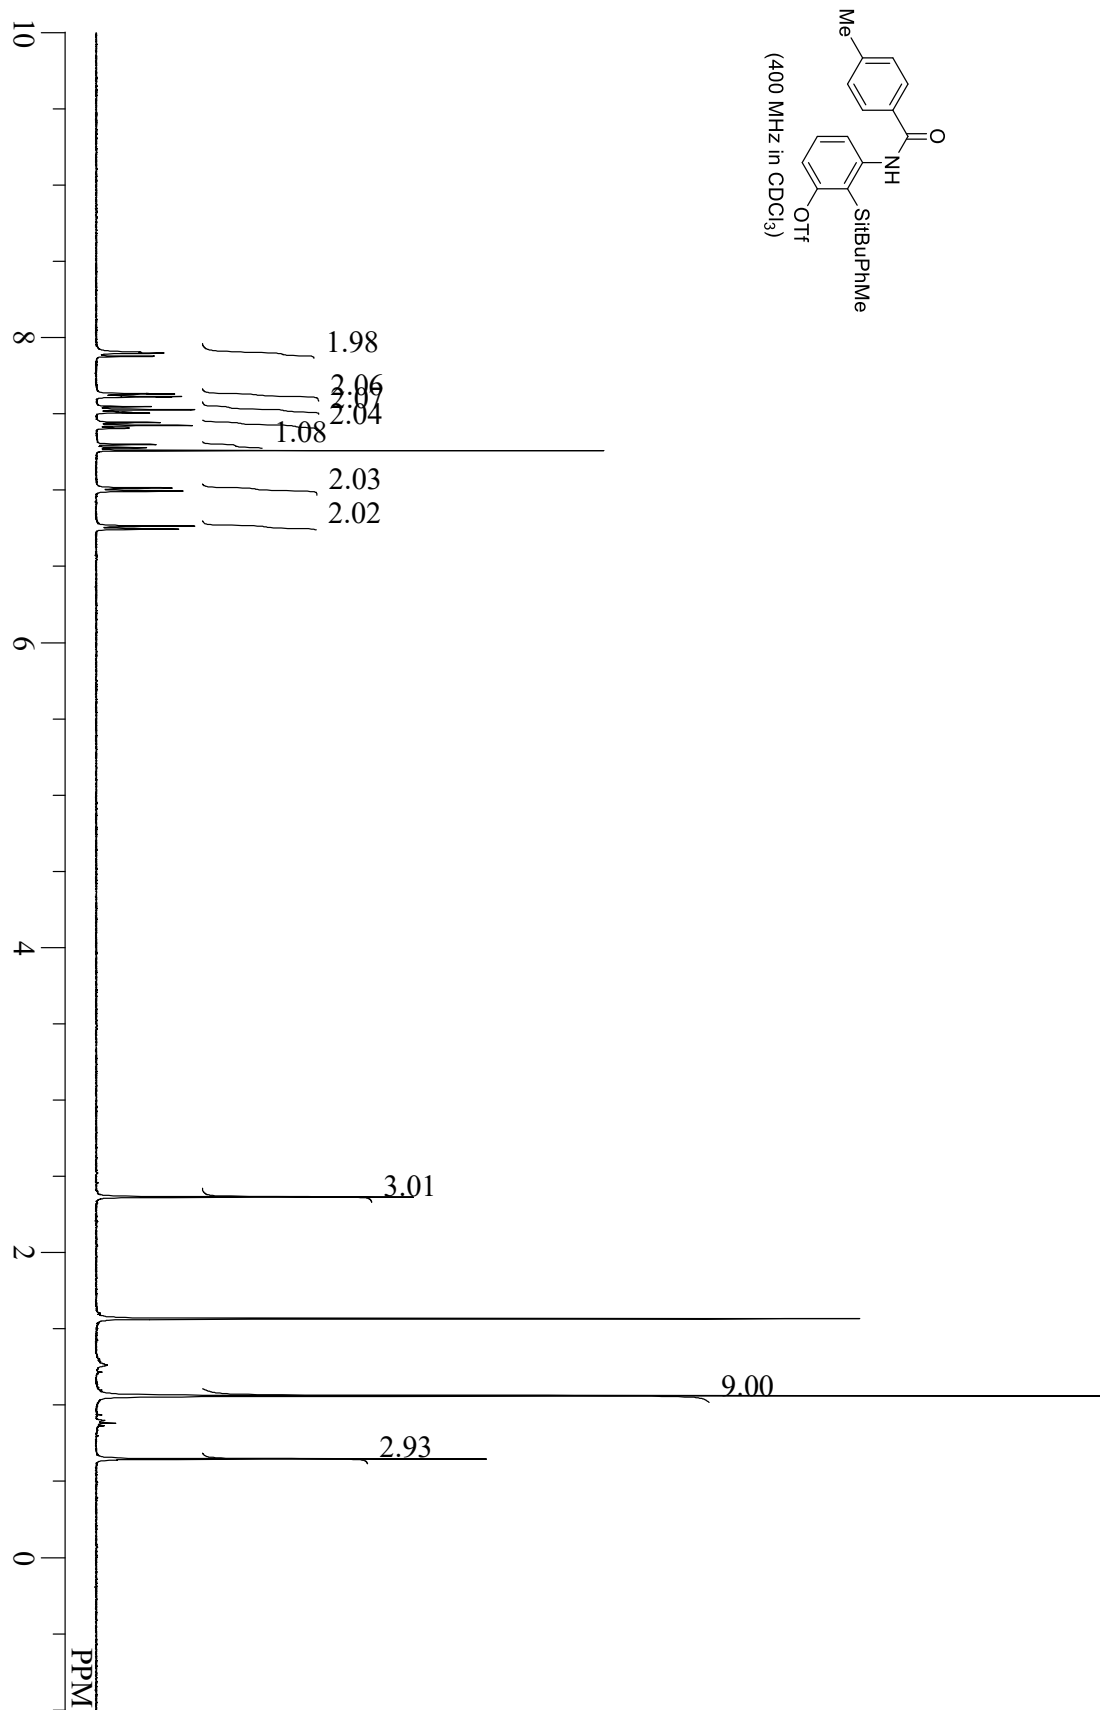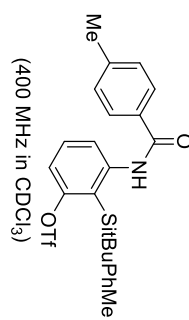

compound **1gg**

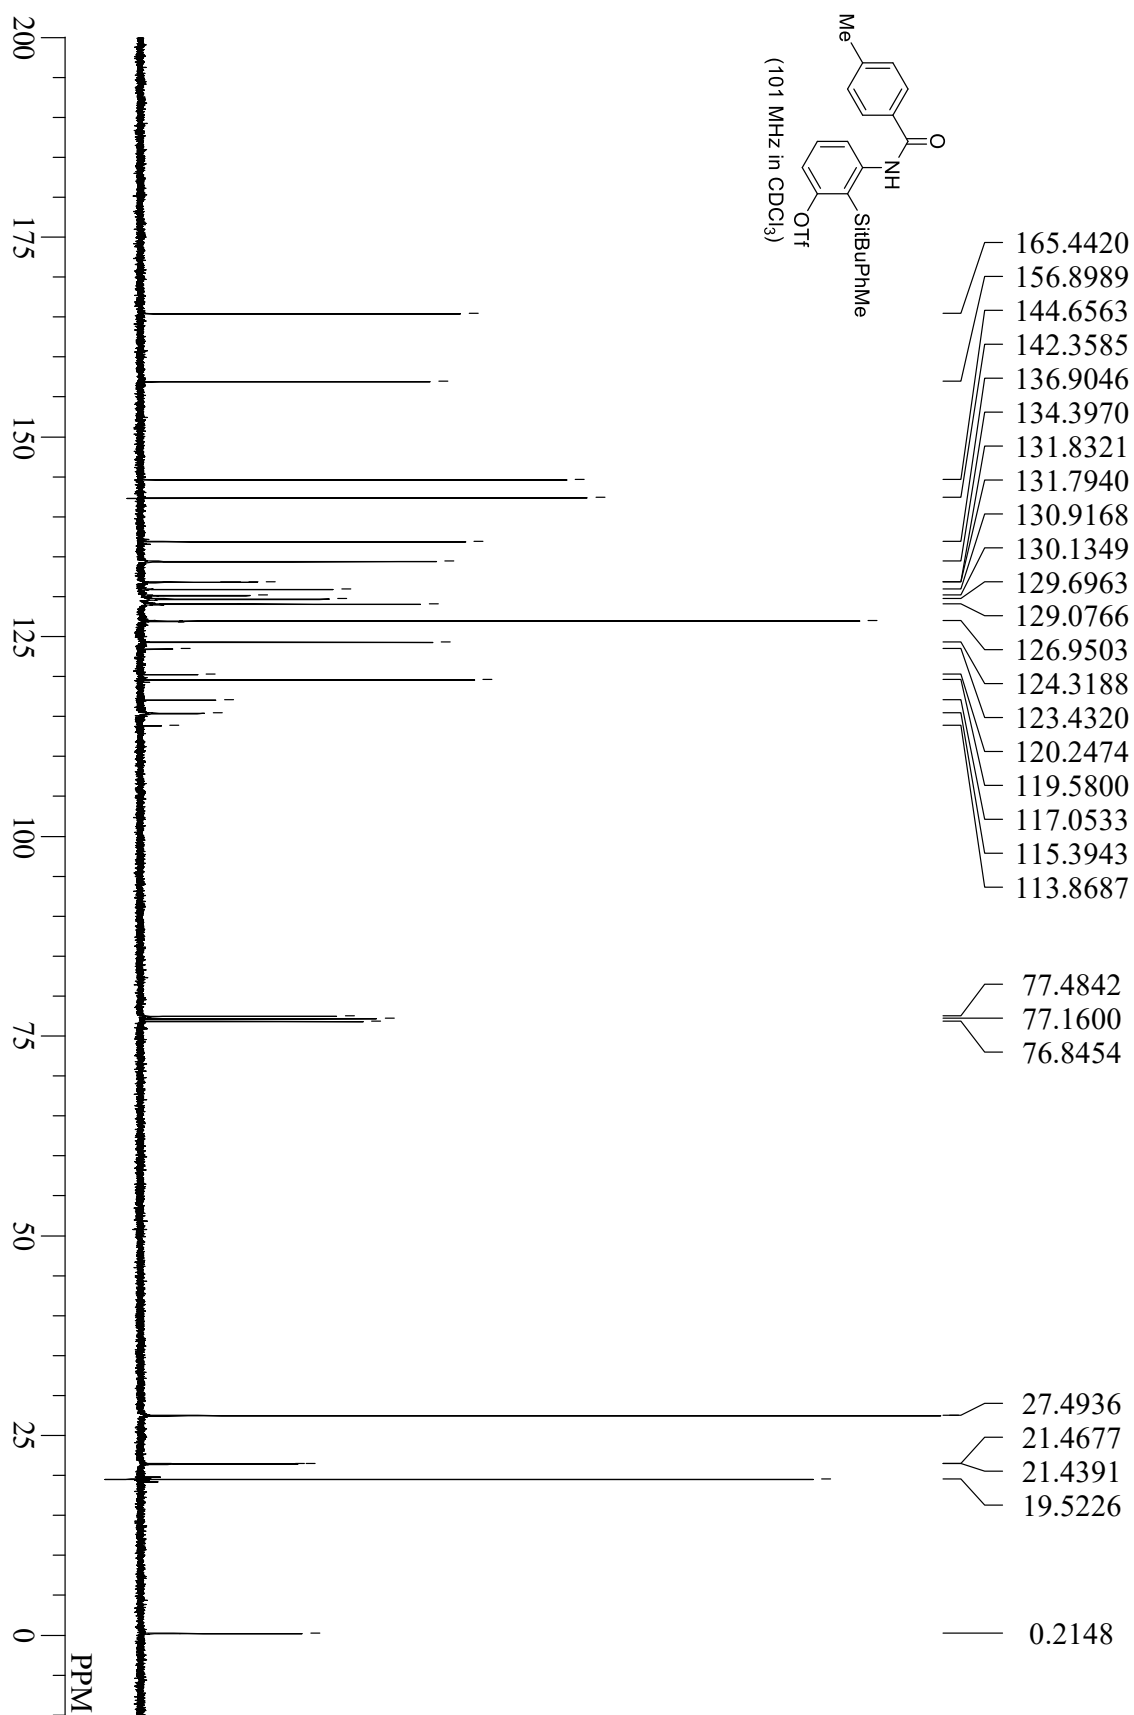

compound **1hh**

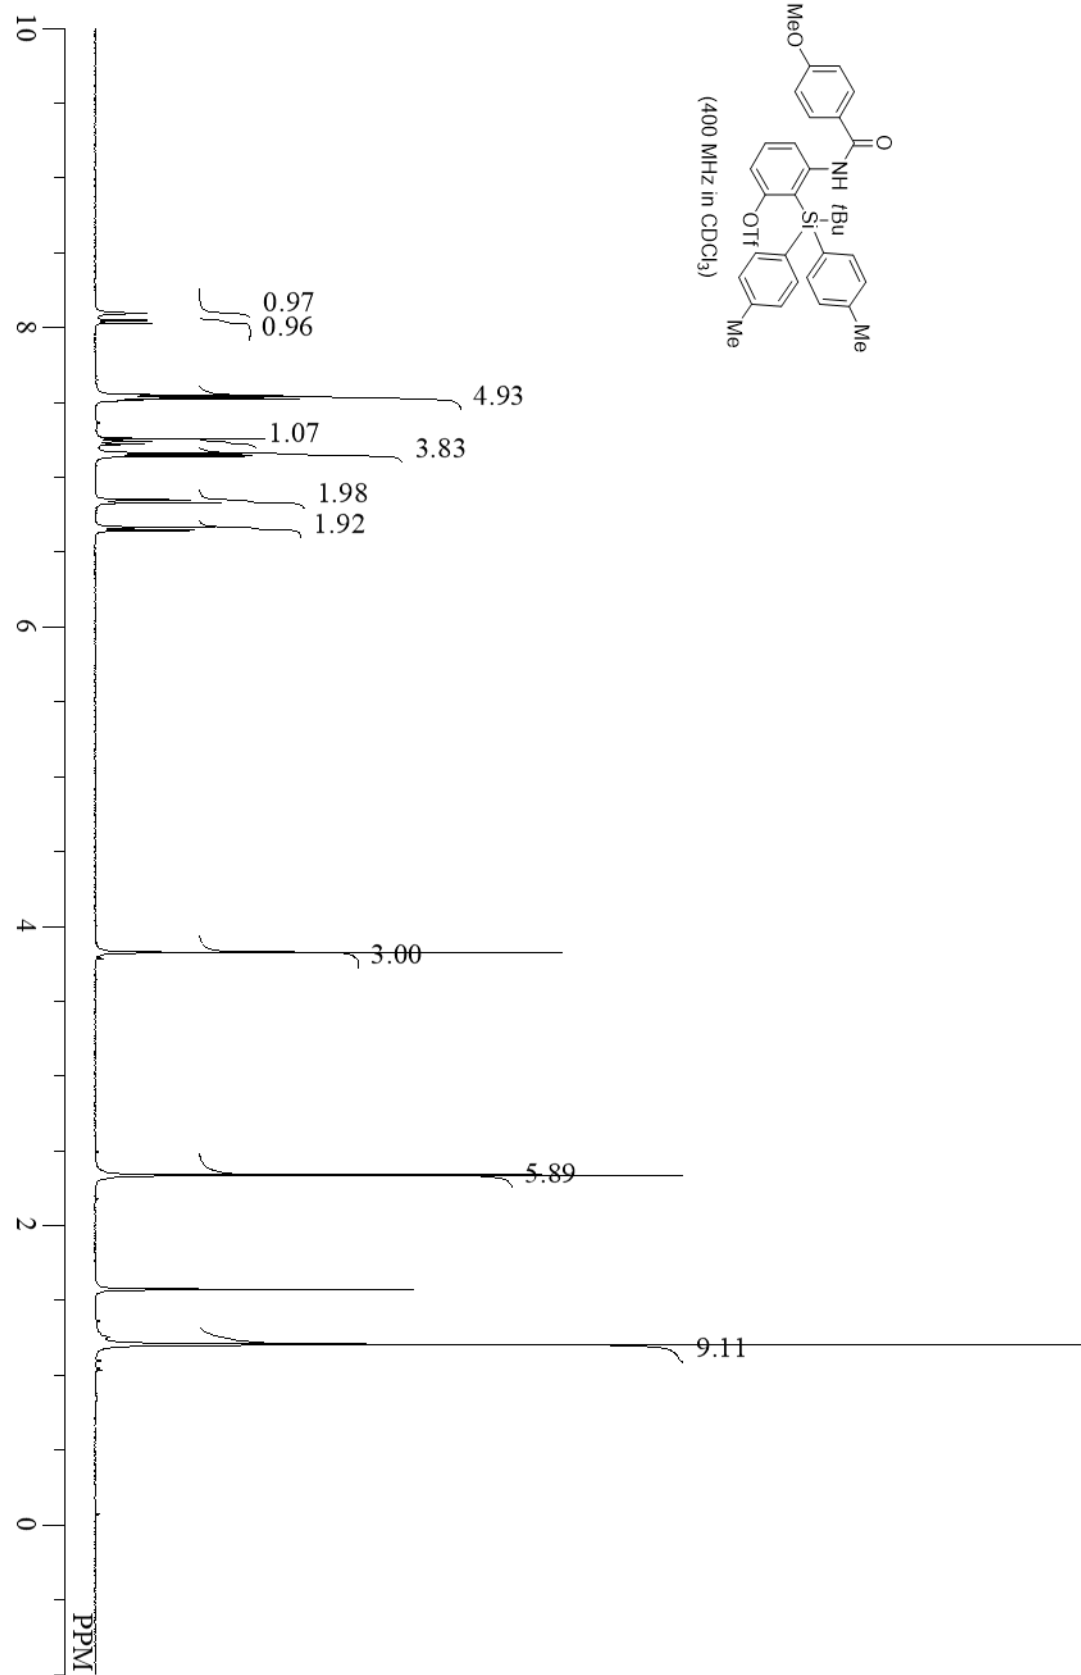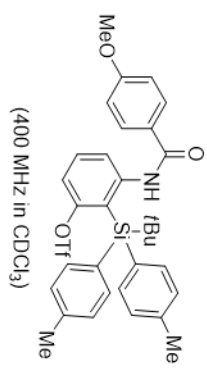

compound **1hh**

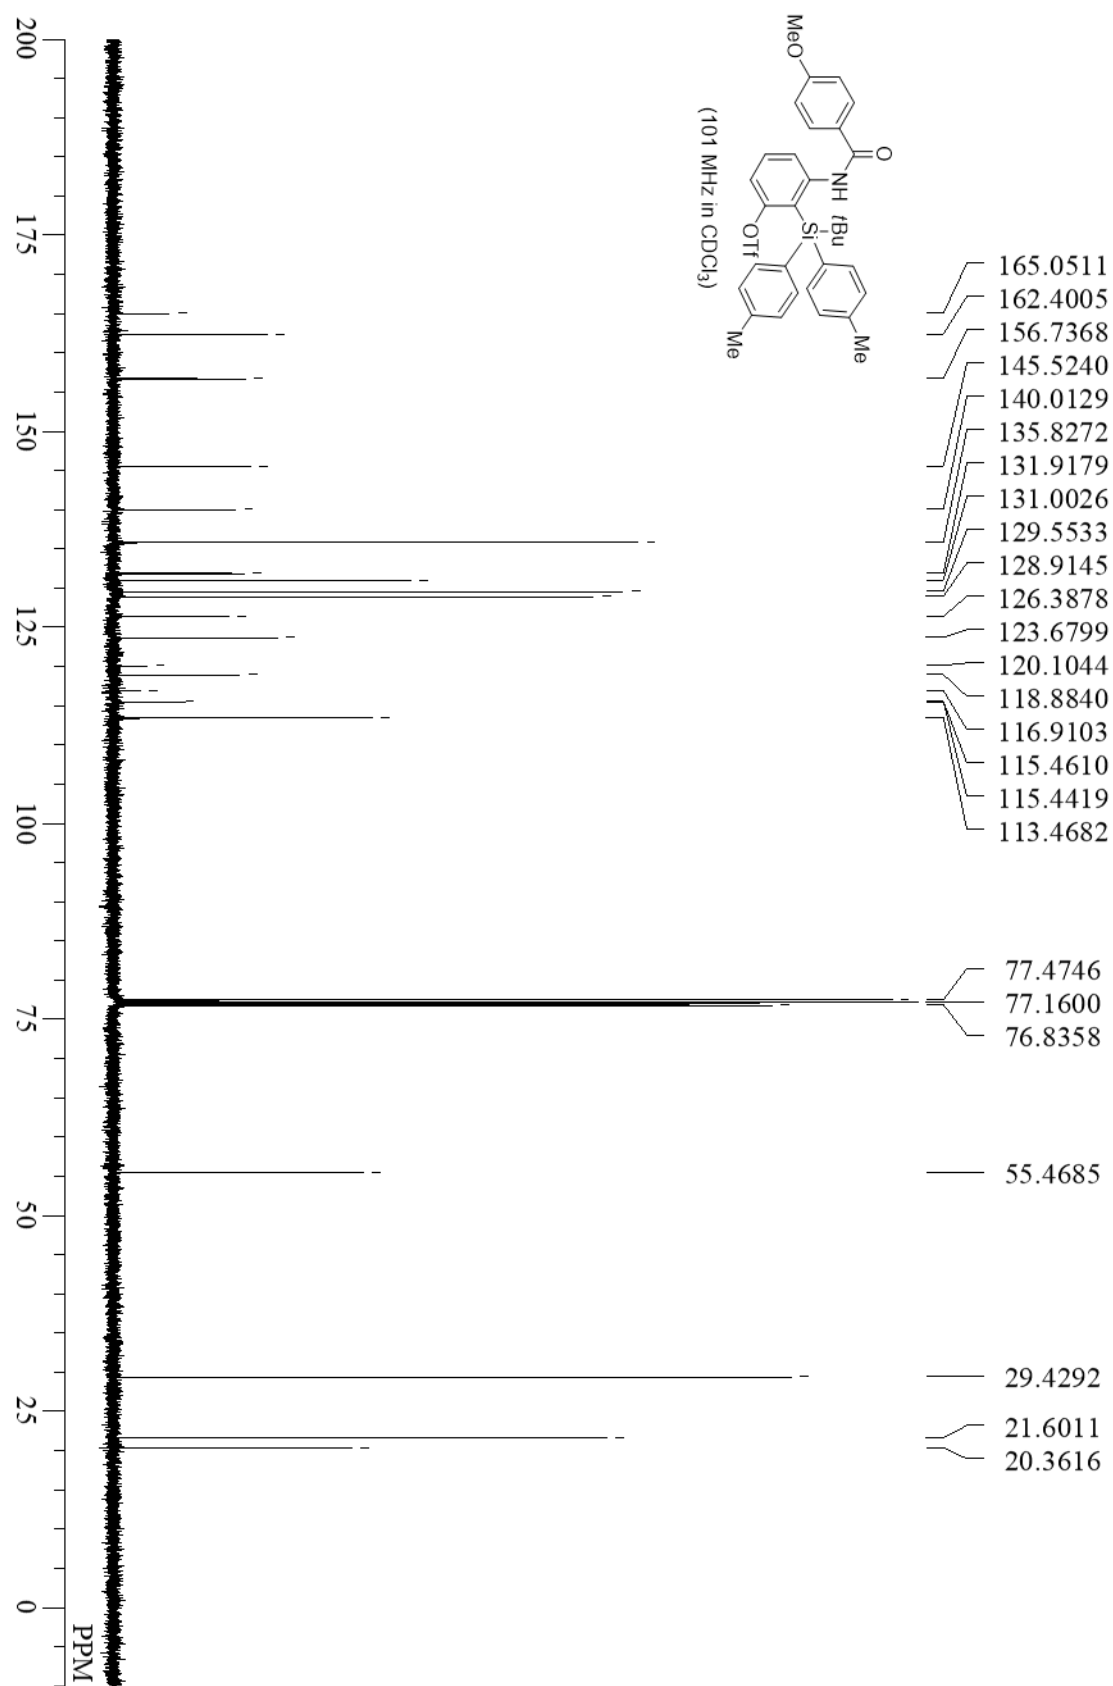



compound **1ii**

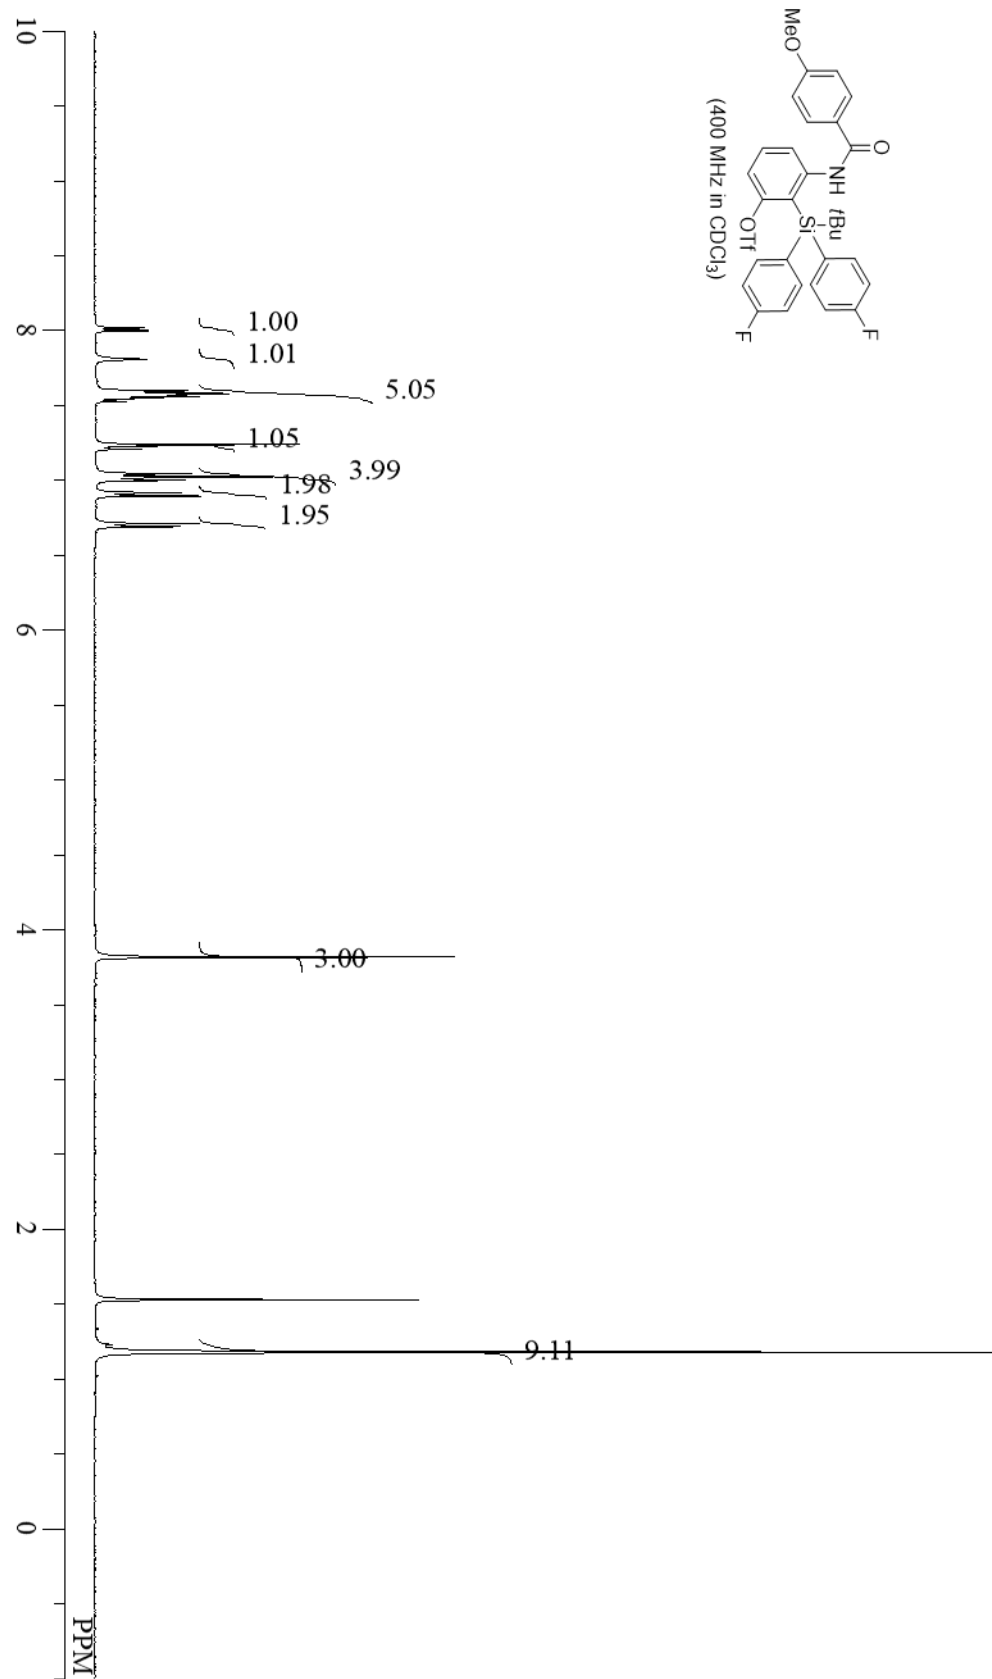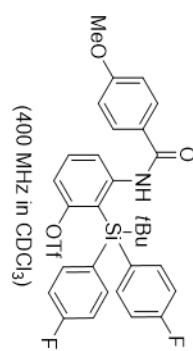

compound **1ii**

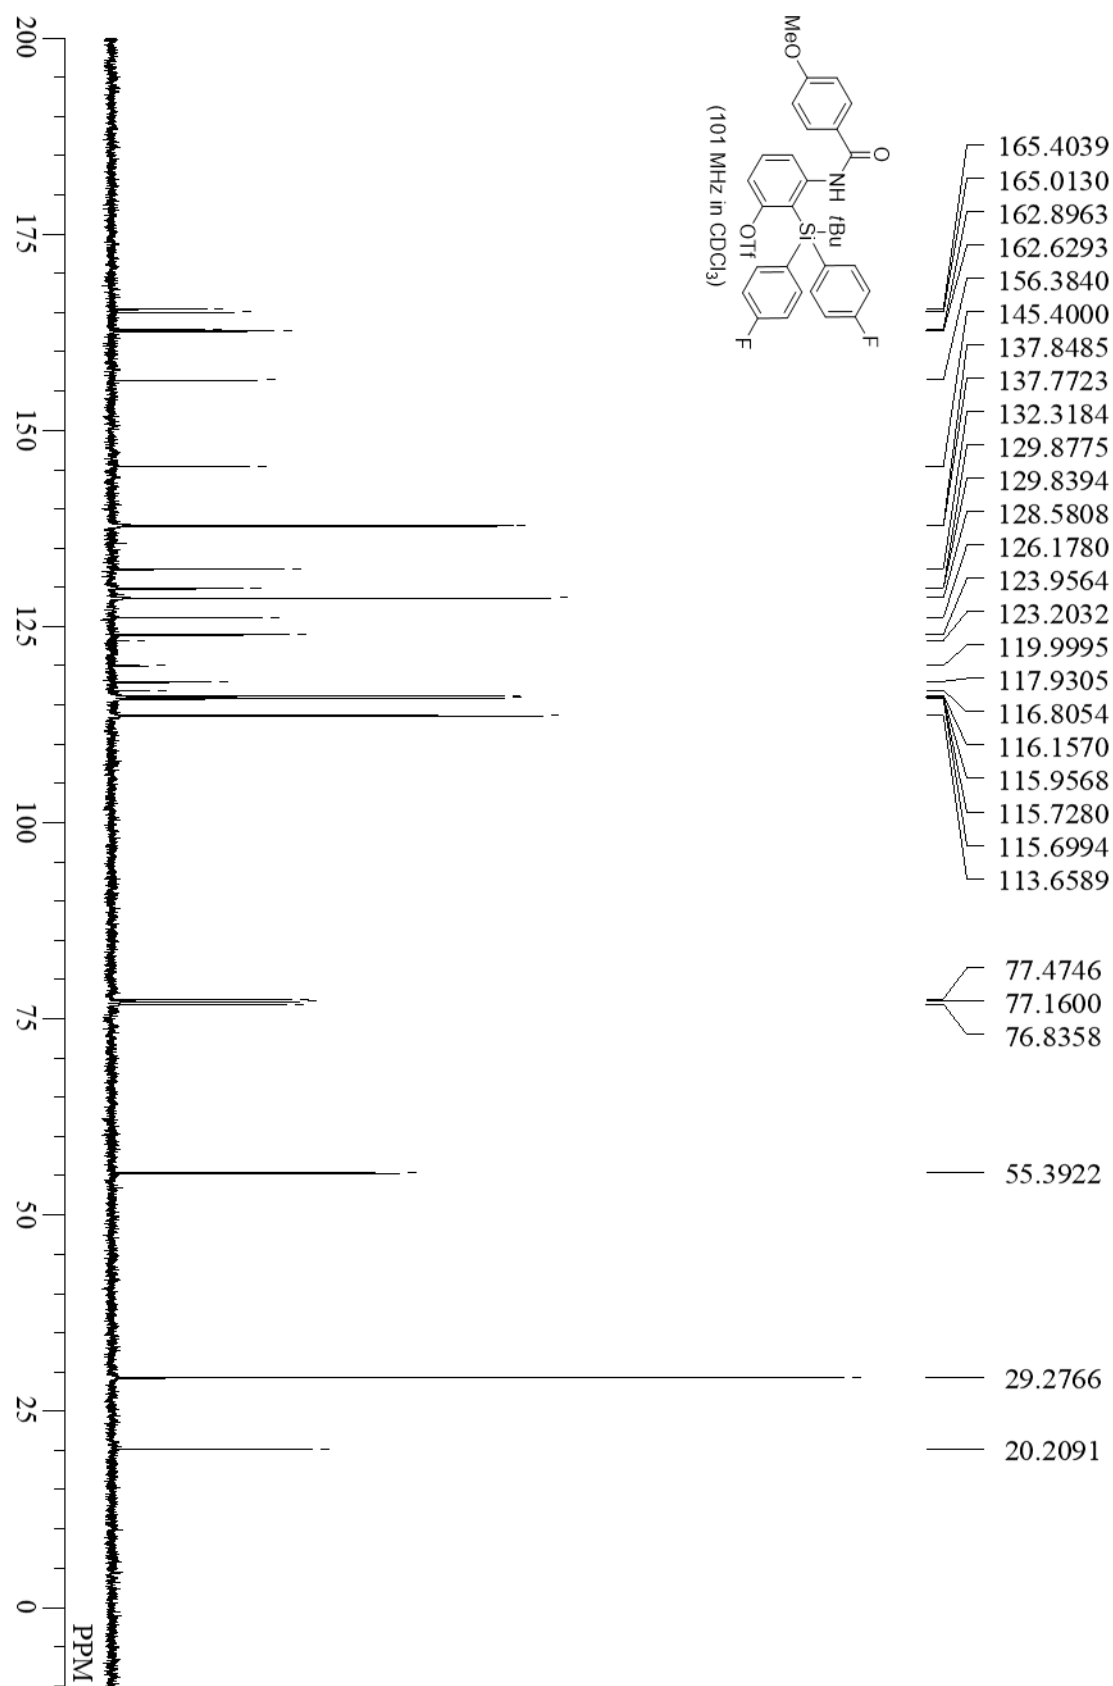

compound **1jj**

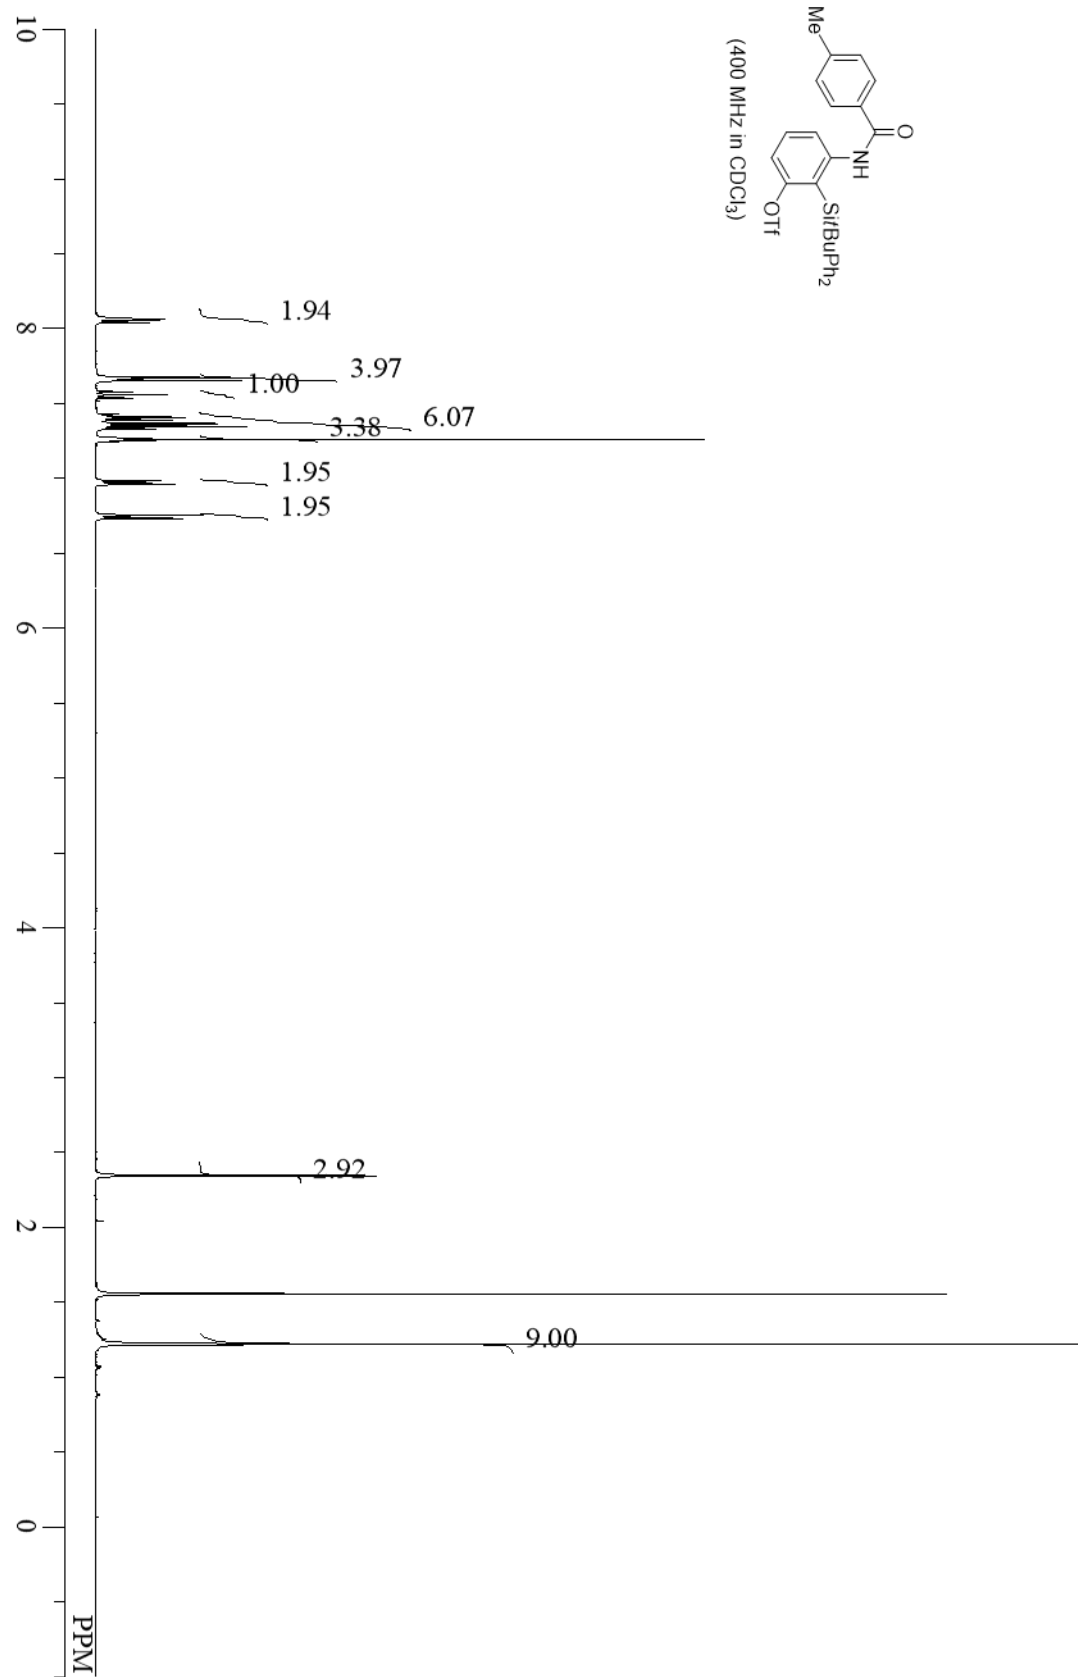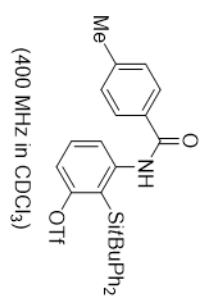

compound **1jj**

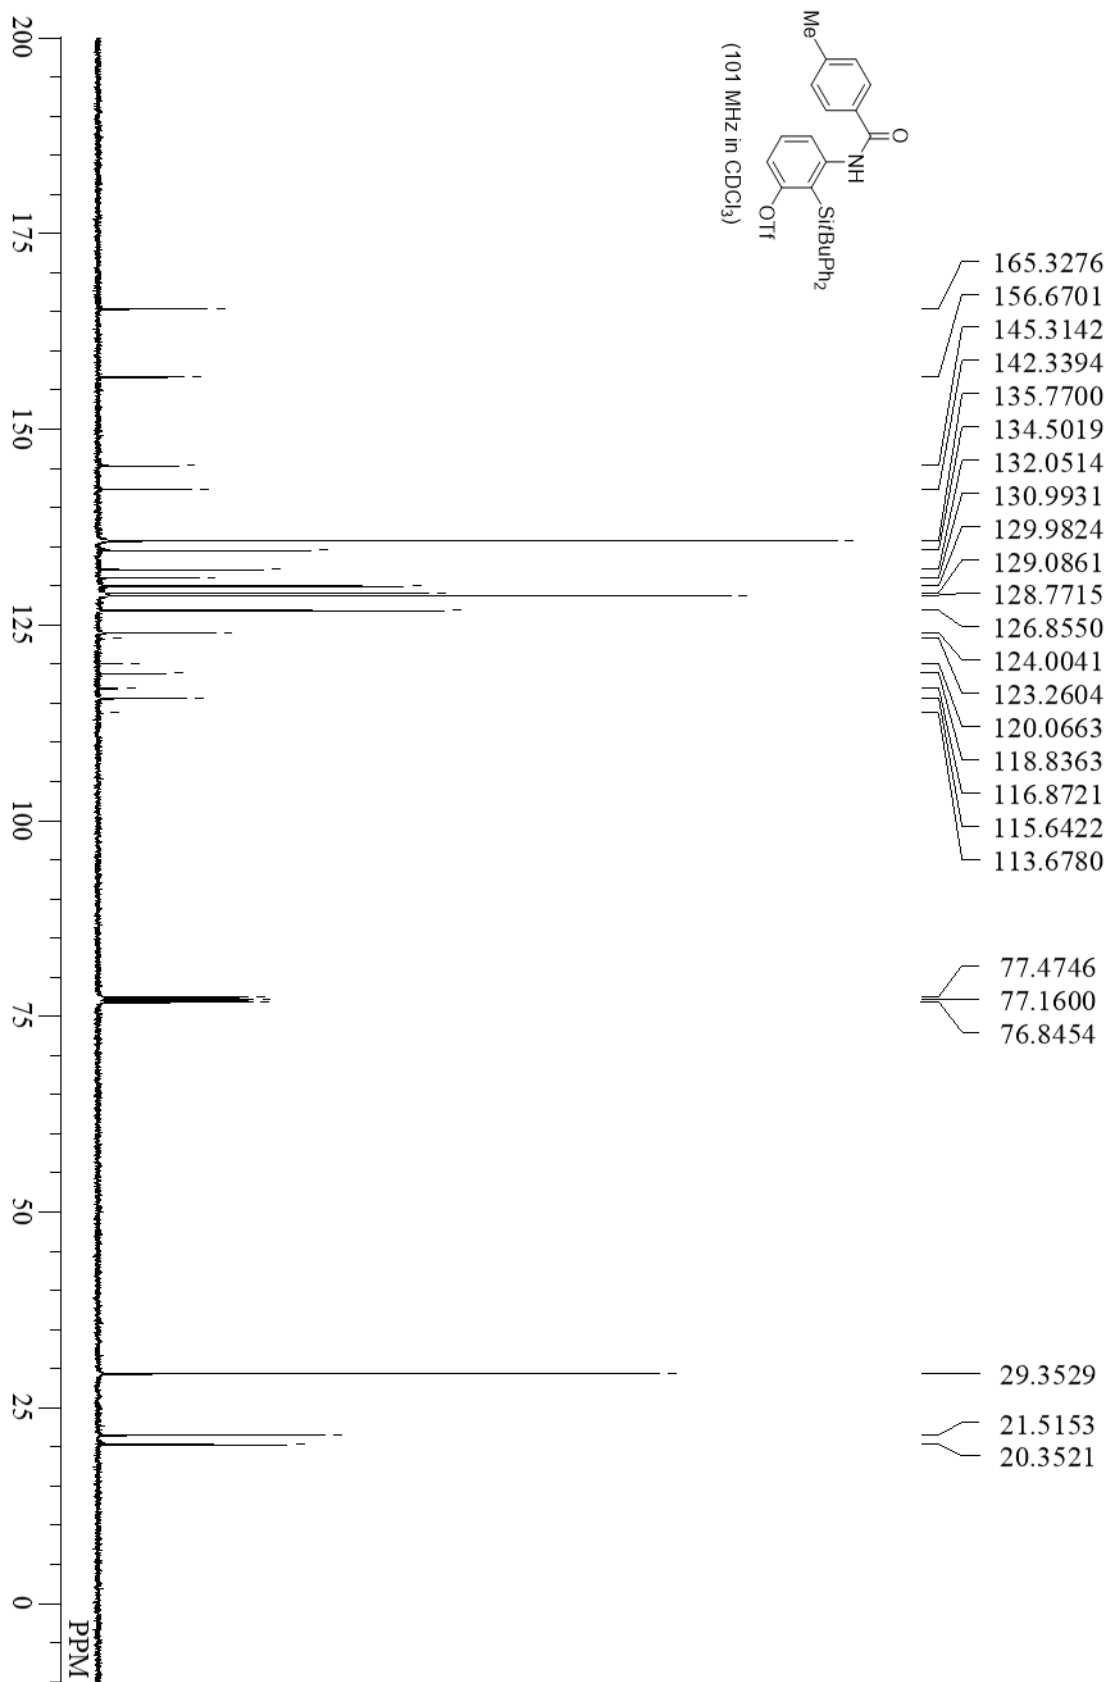

compound **1kk**

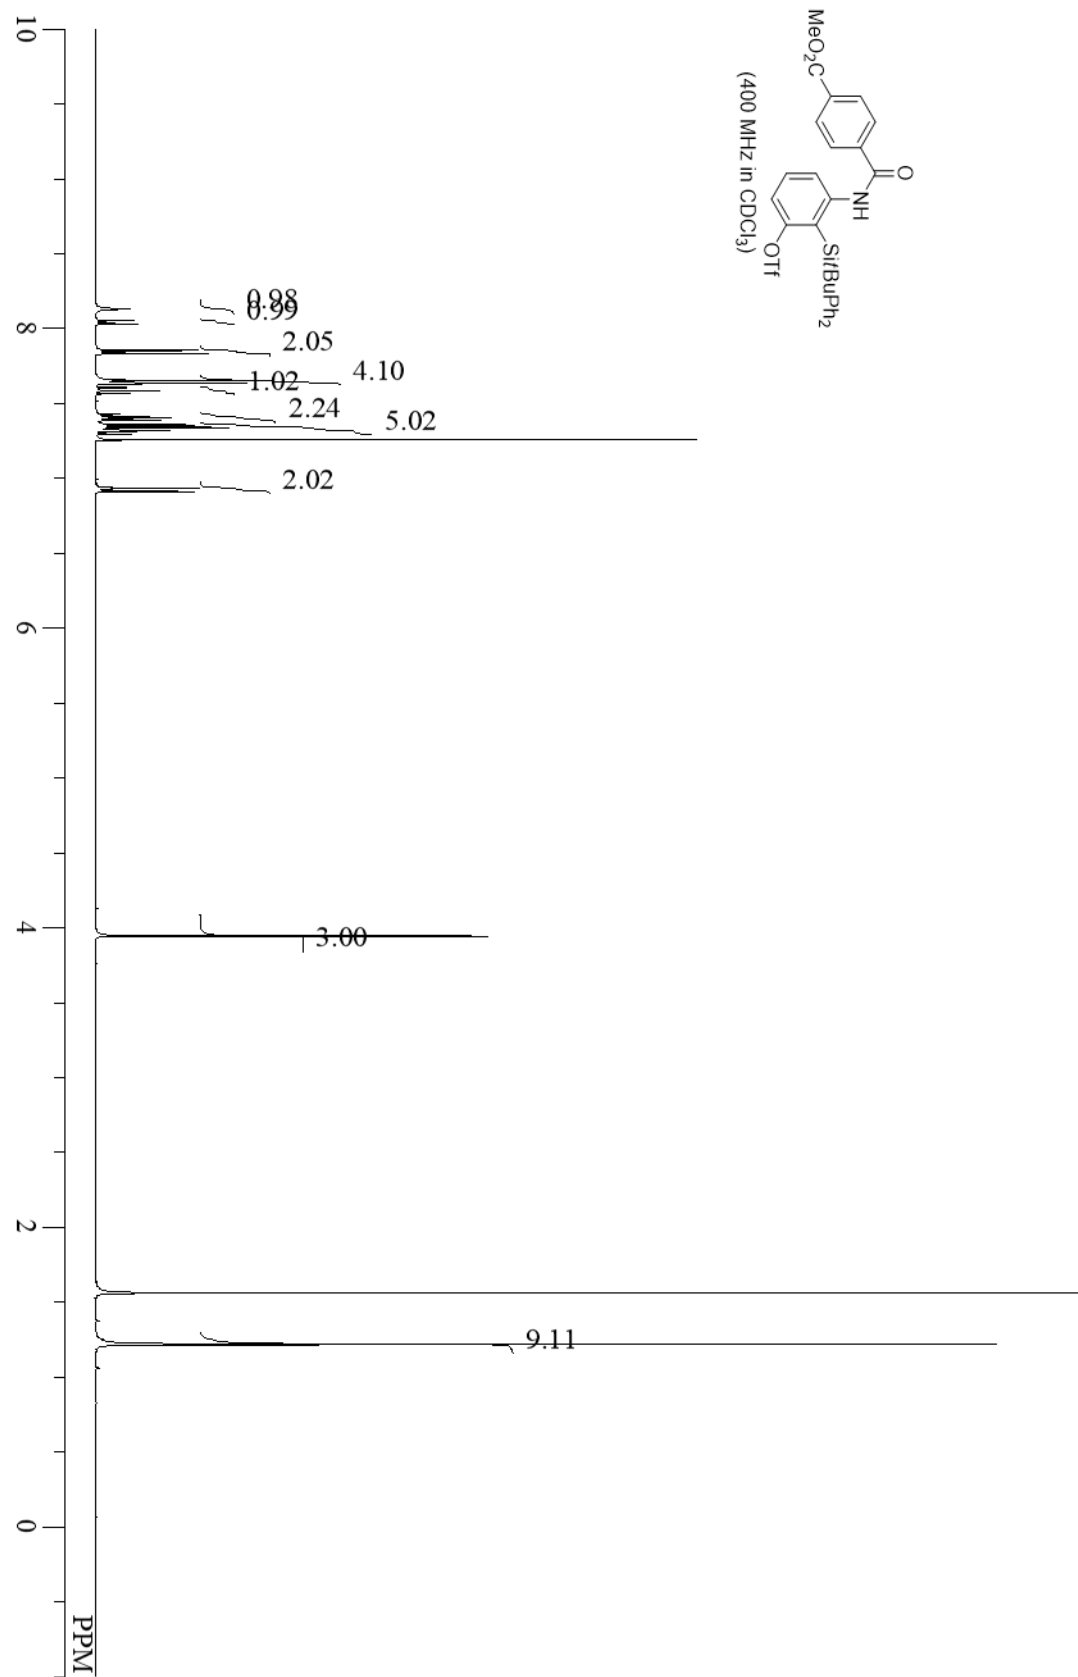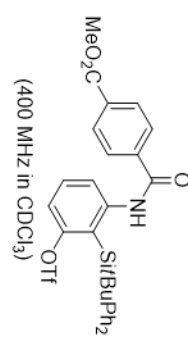

compound **1kk**

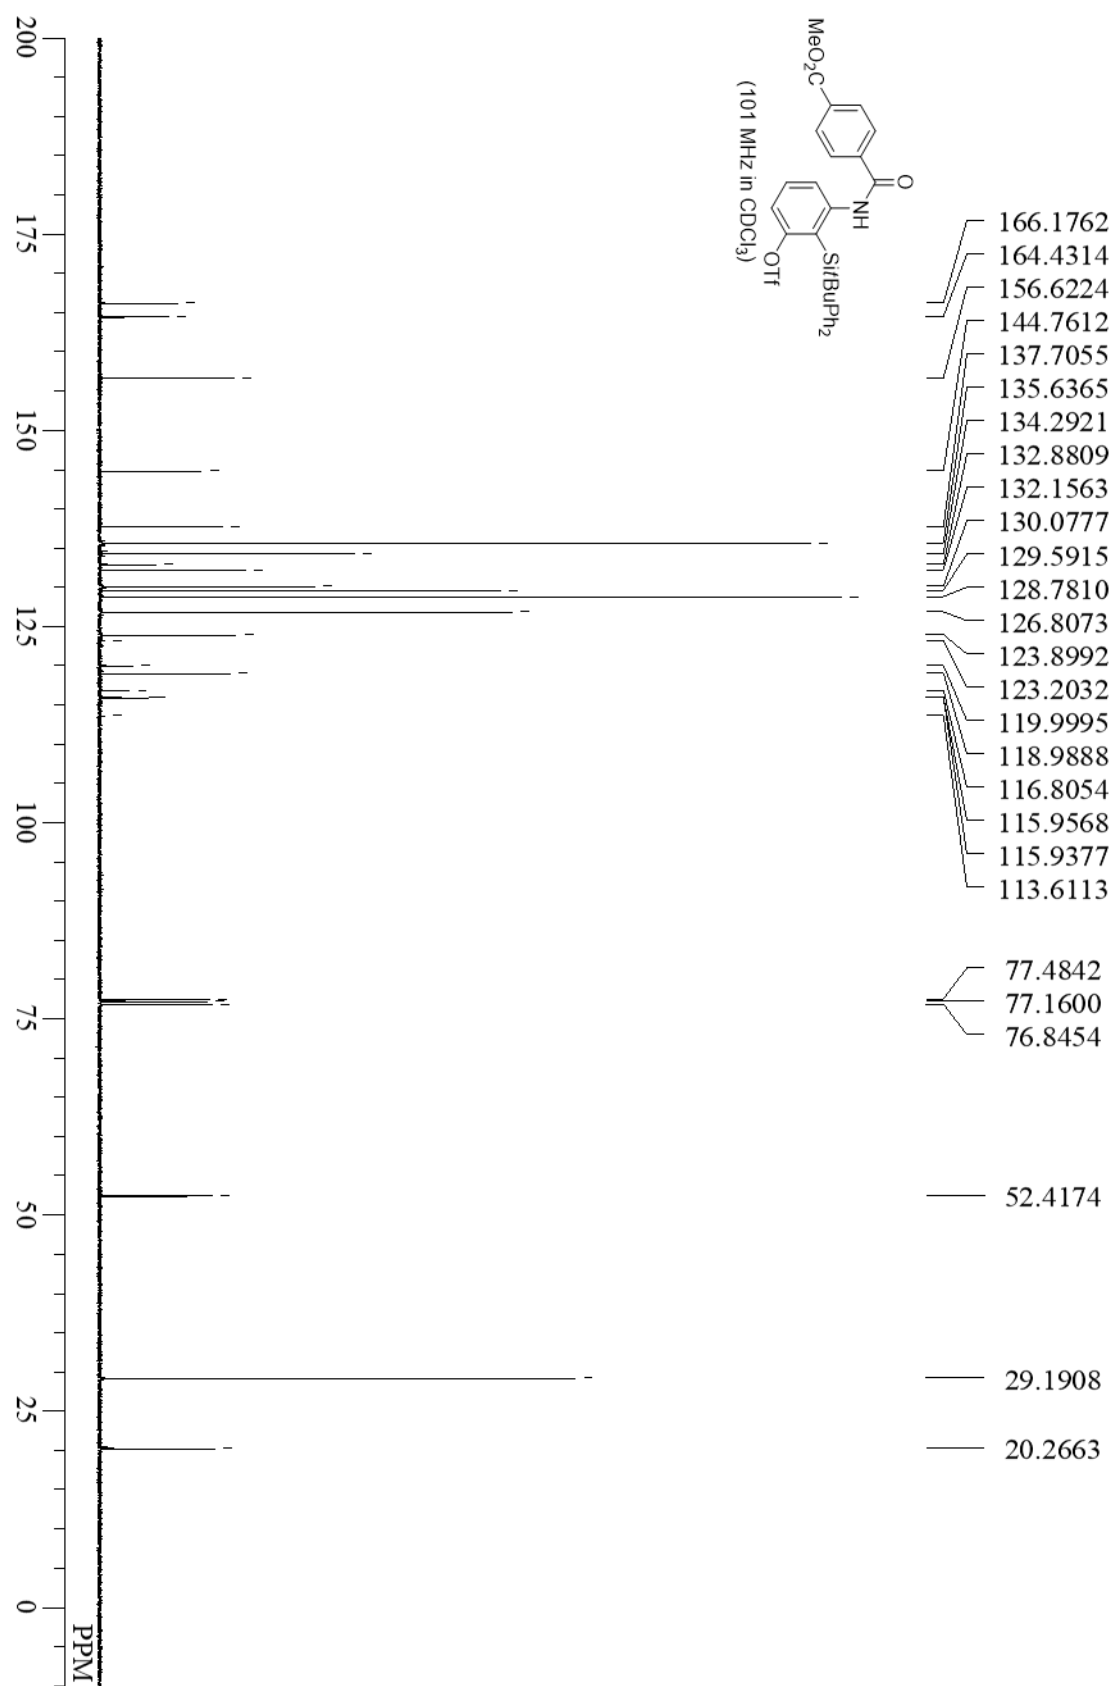

compound **111**

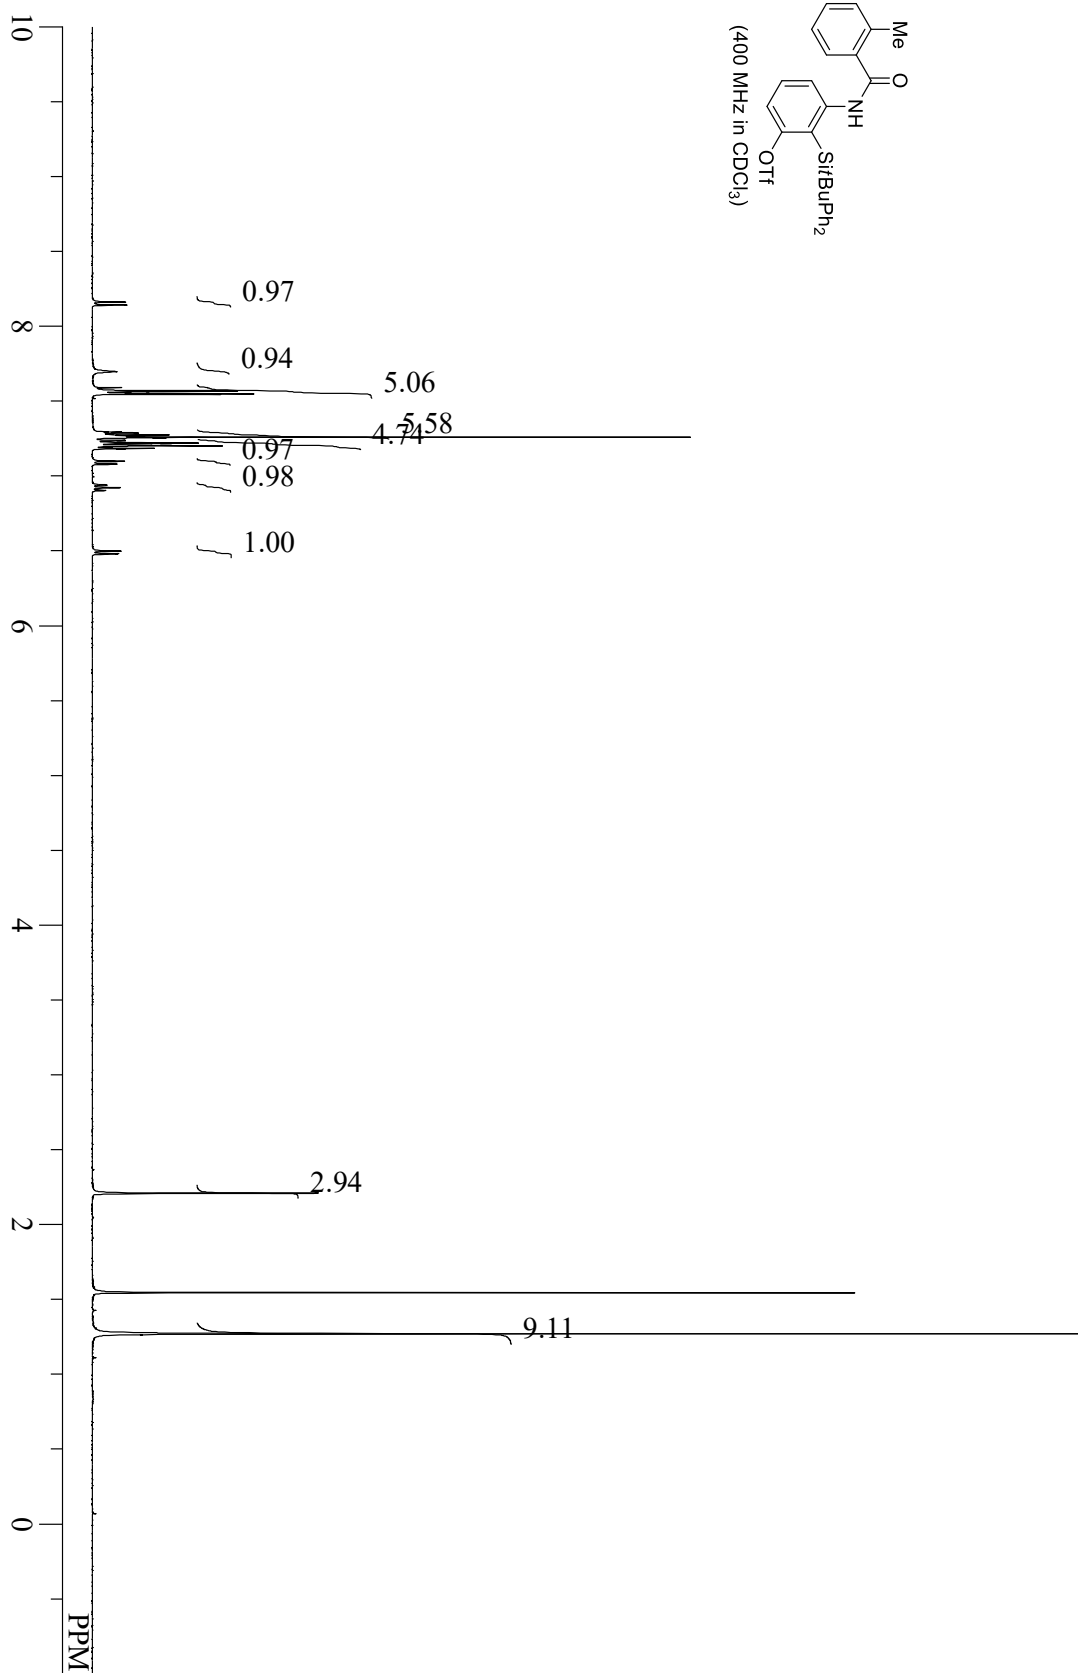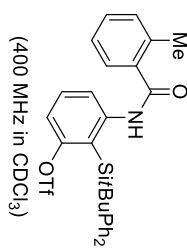

compound 111

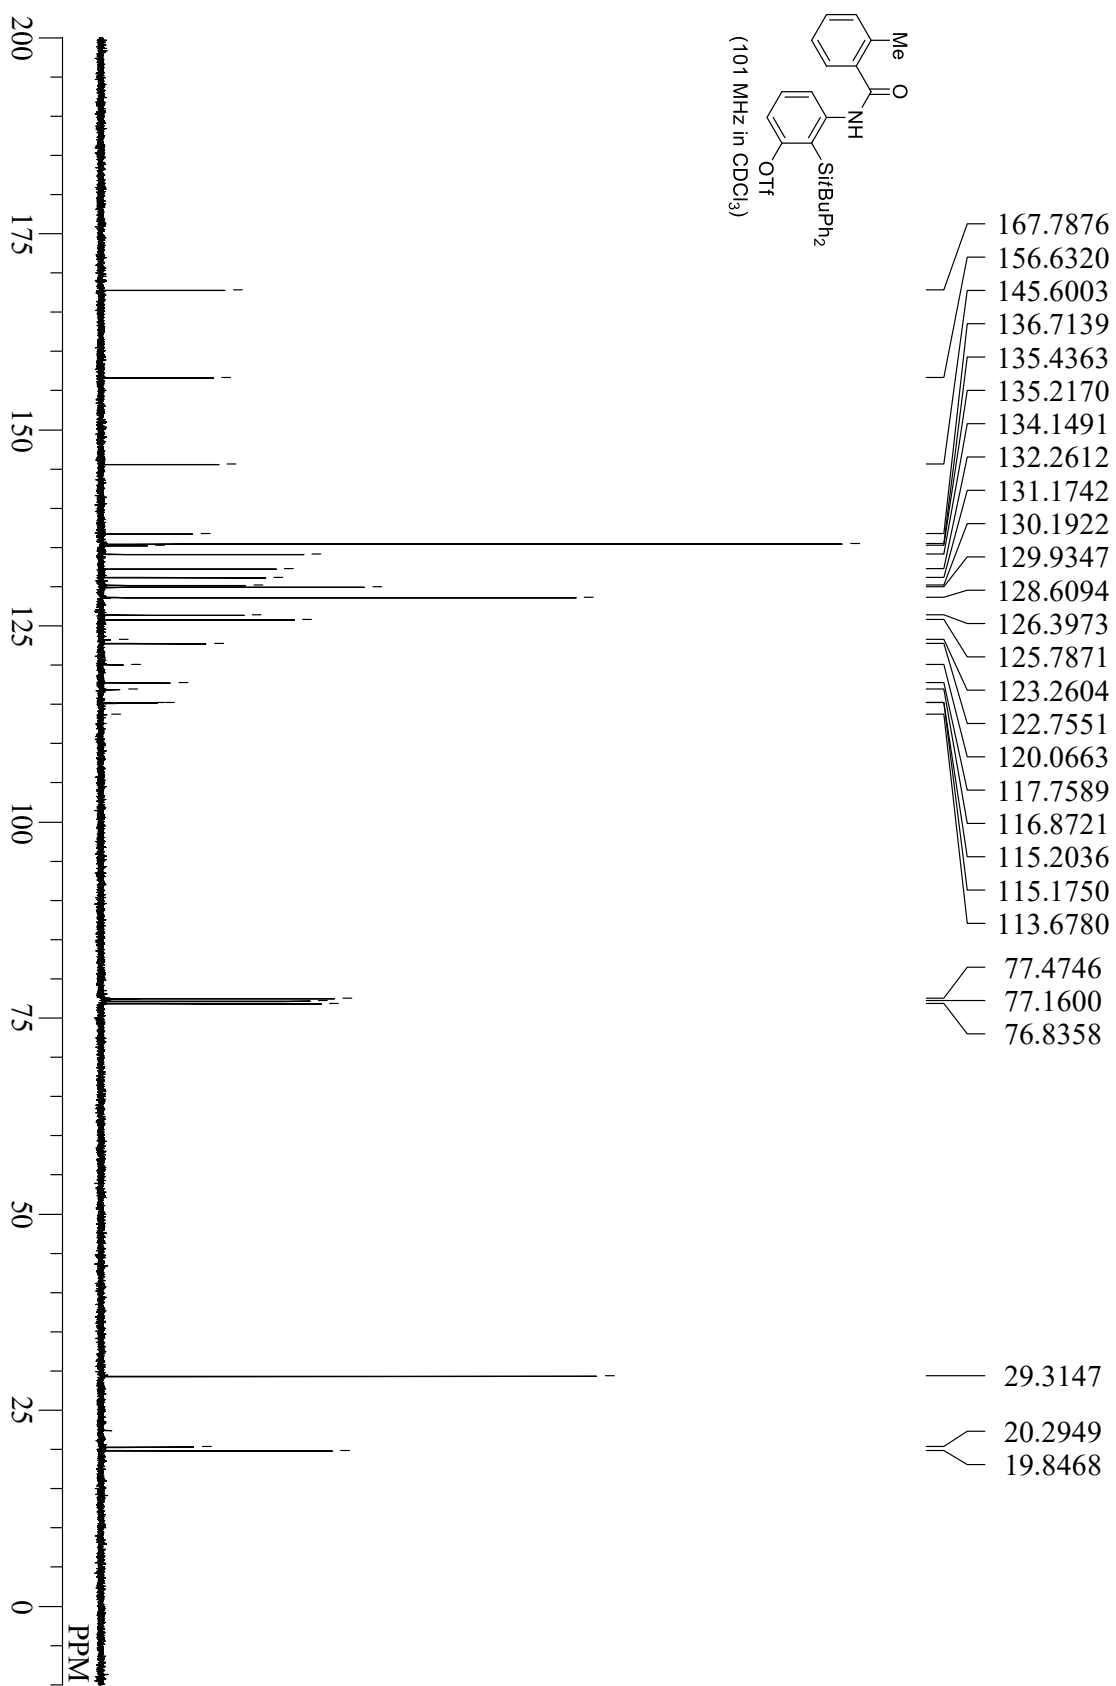



compound **3b**

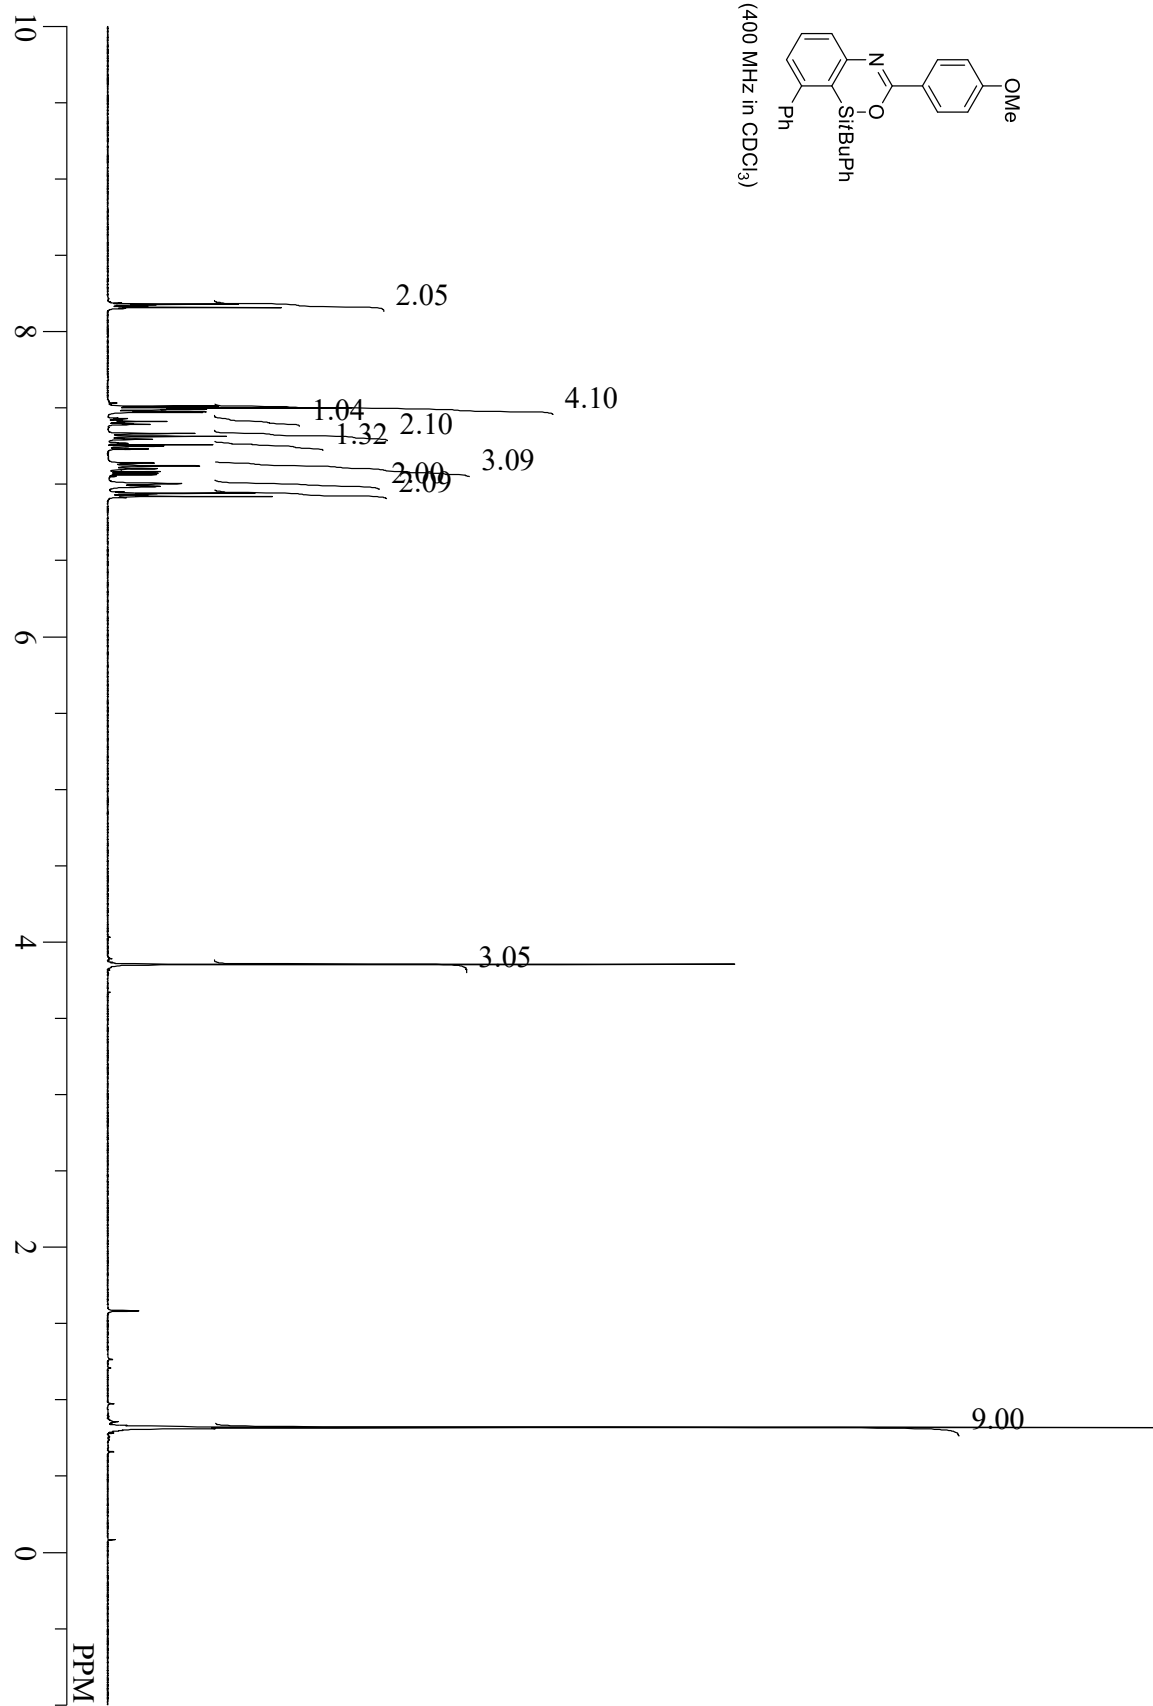

compound 3b

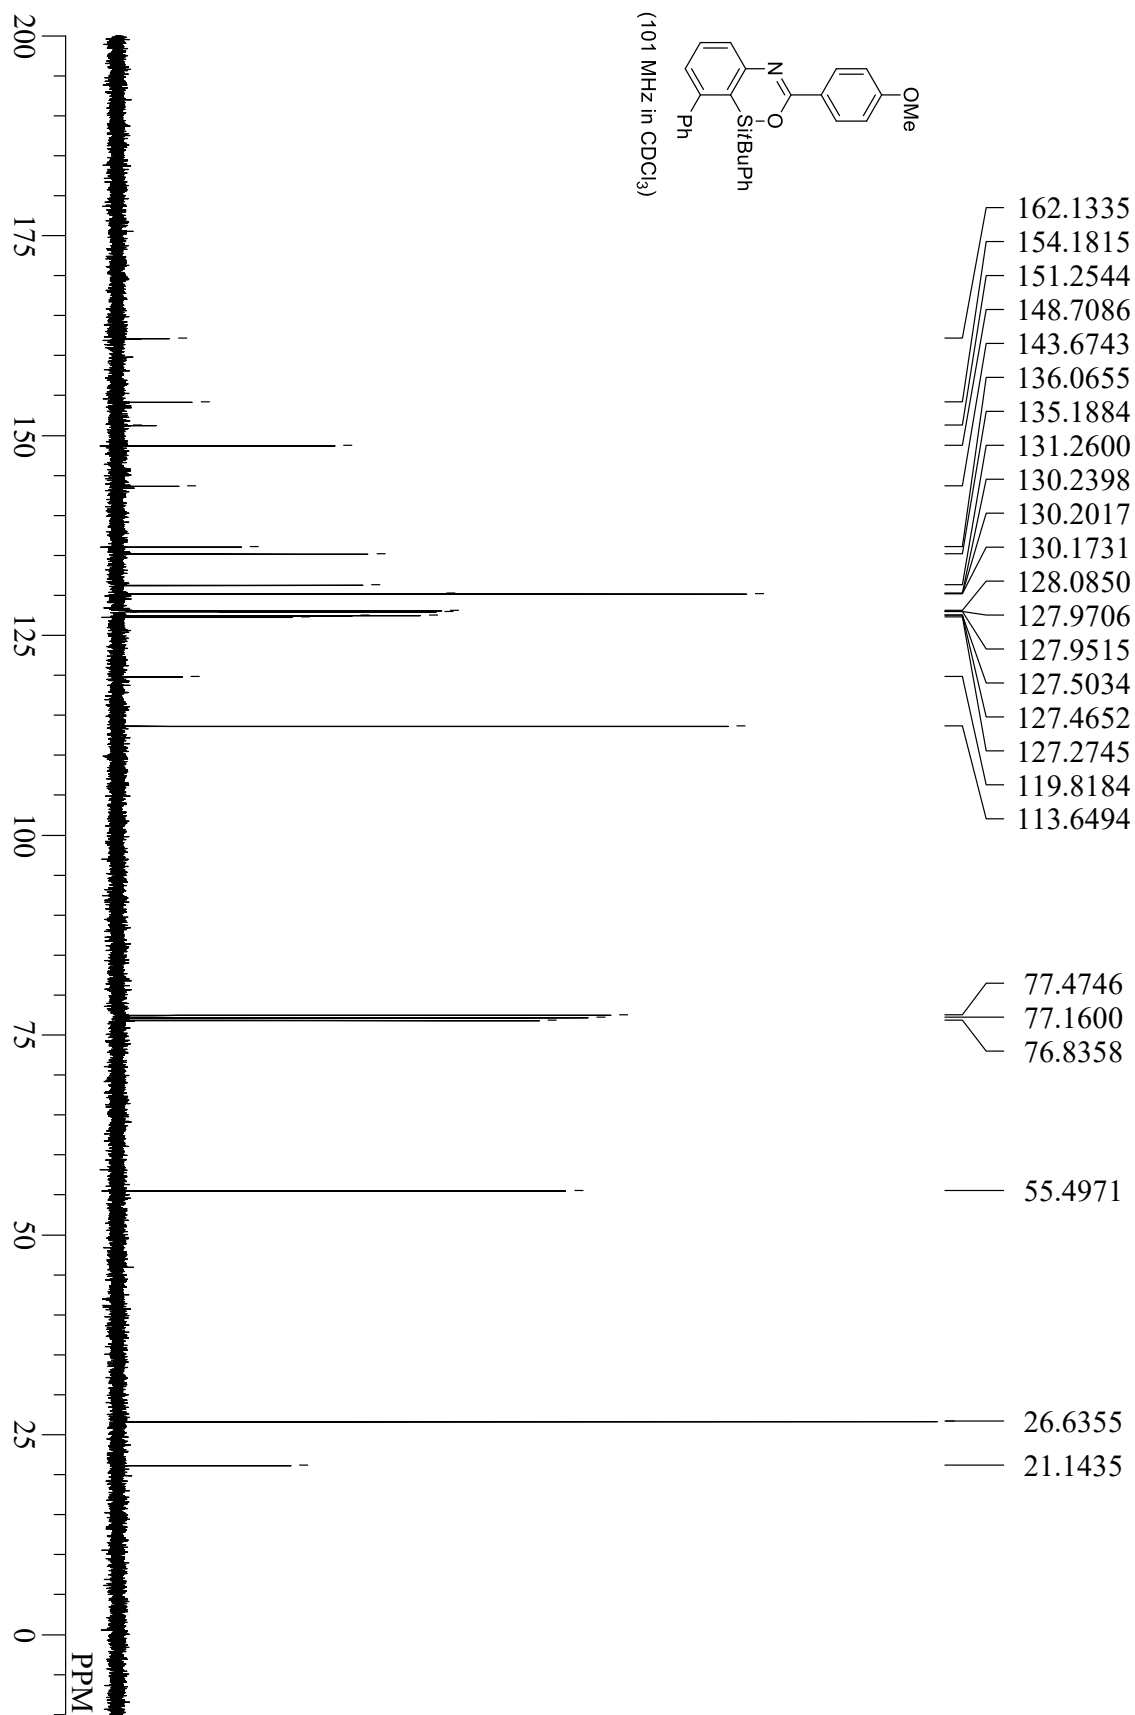

compound 3c

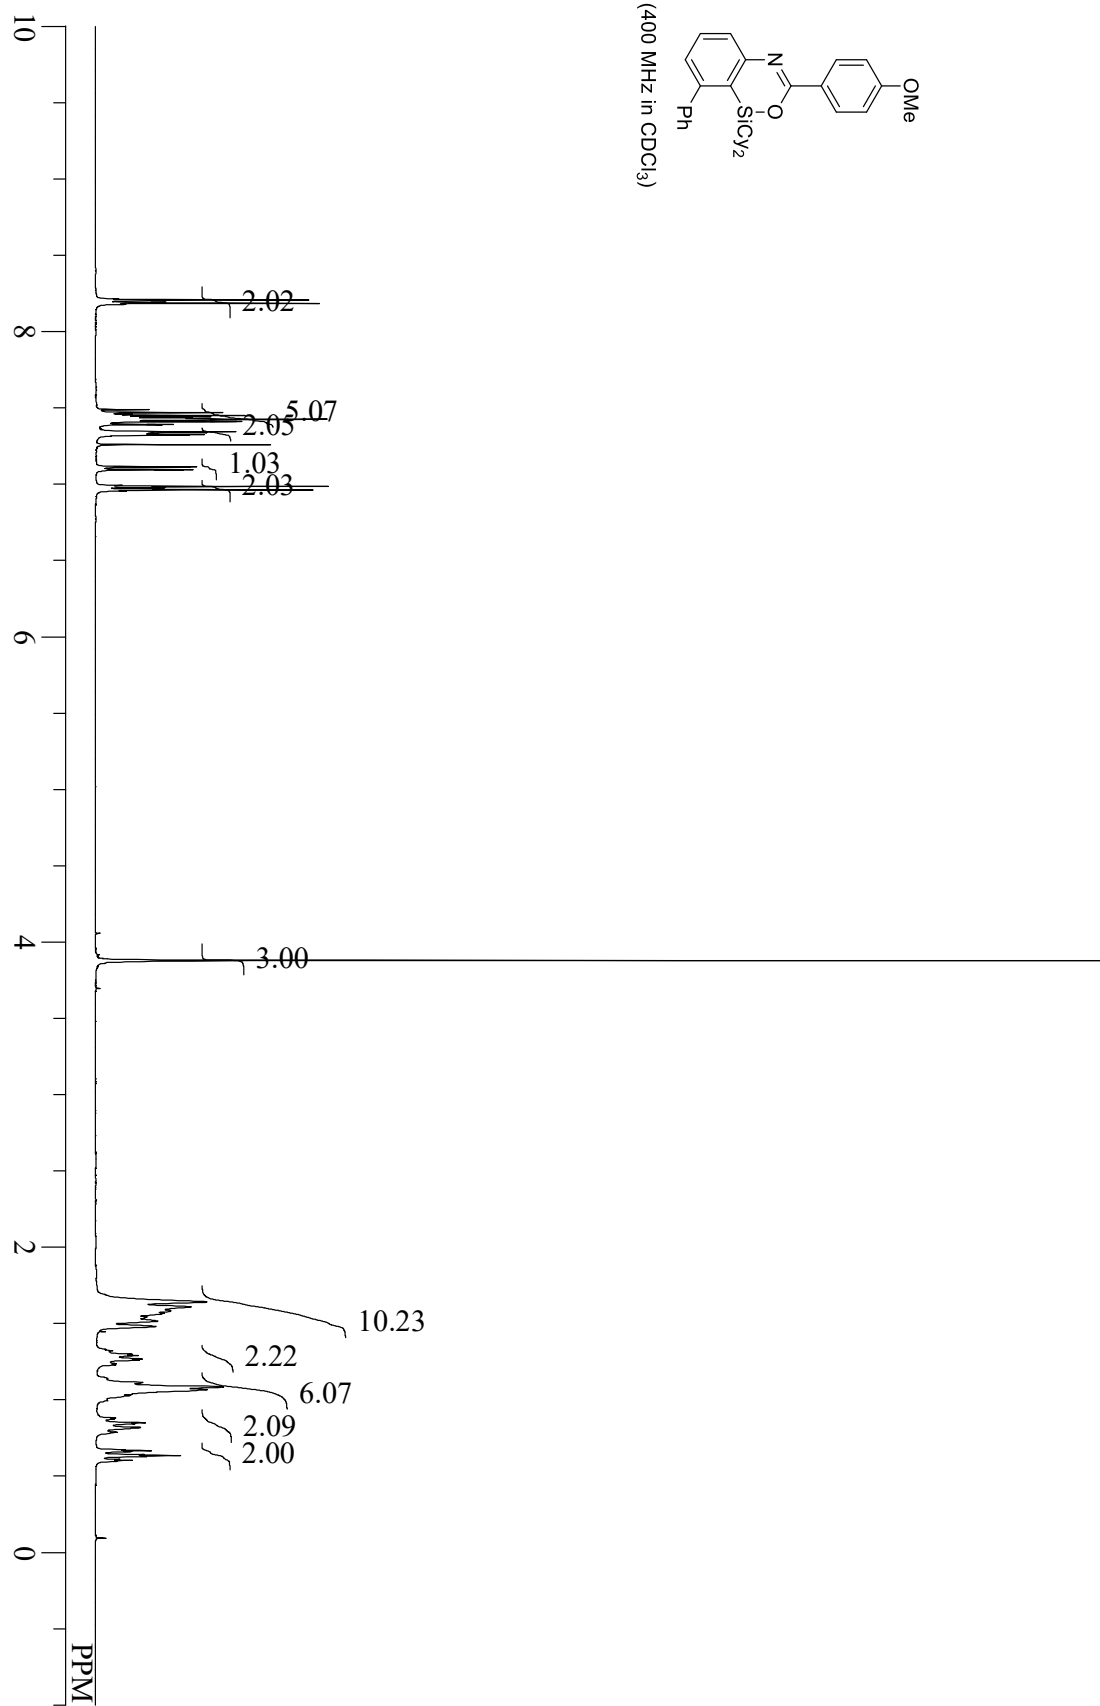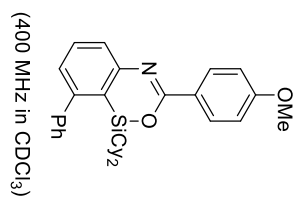

compound 3c

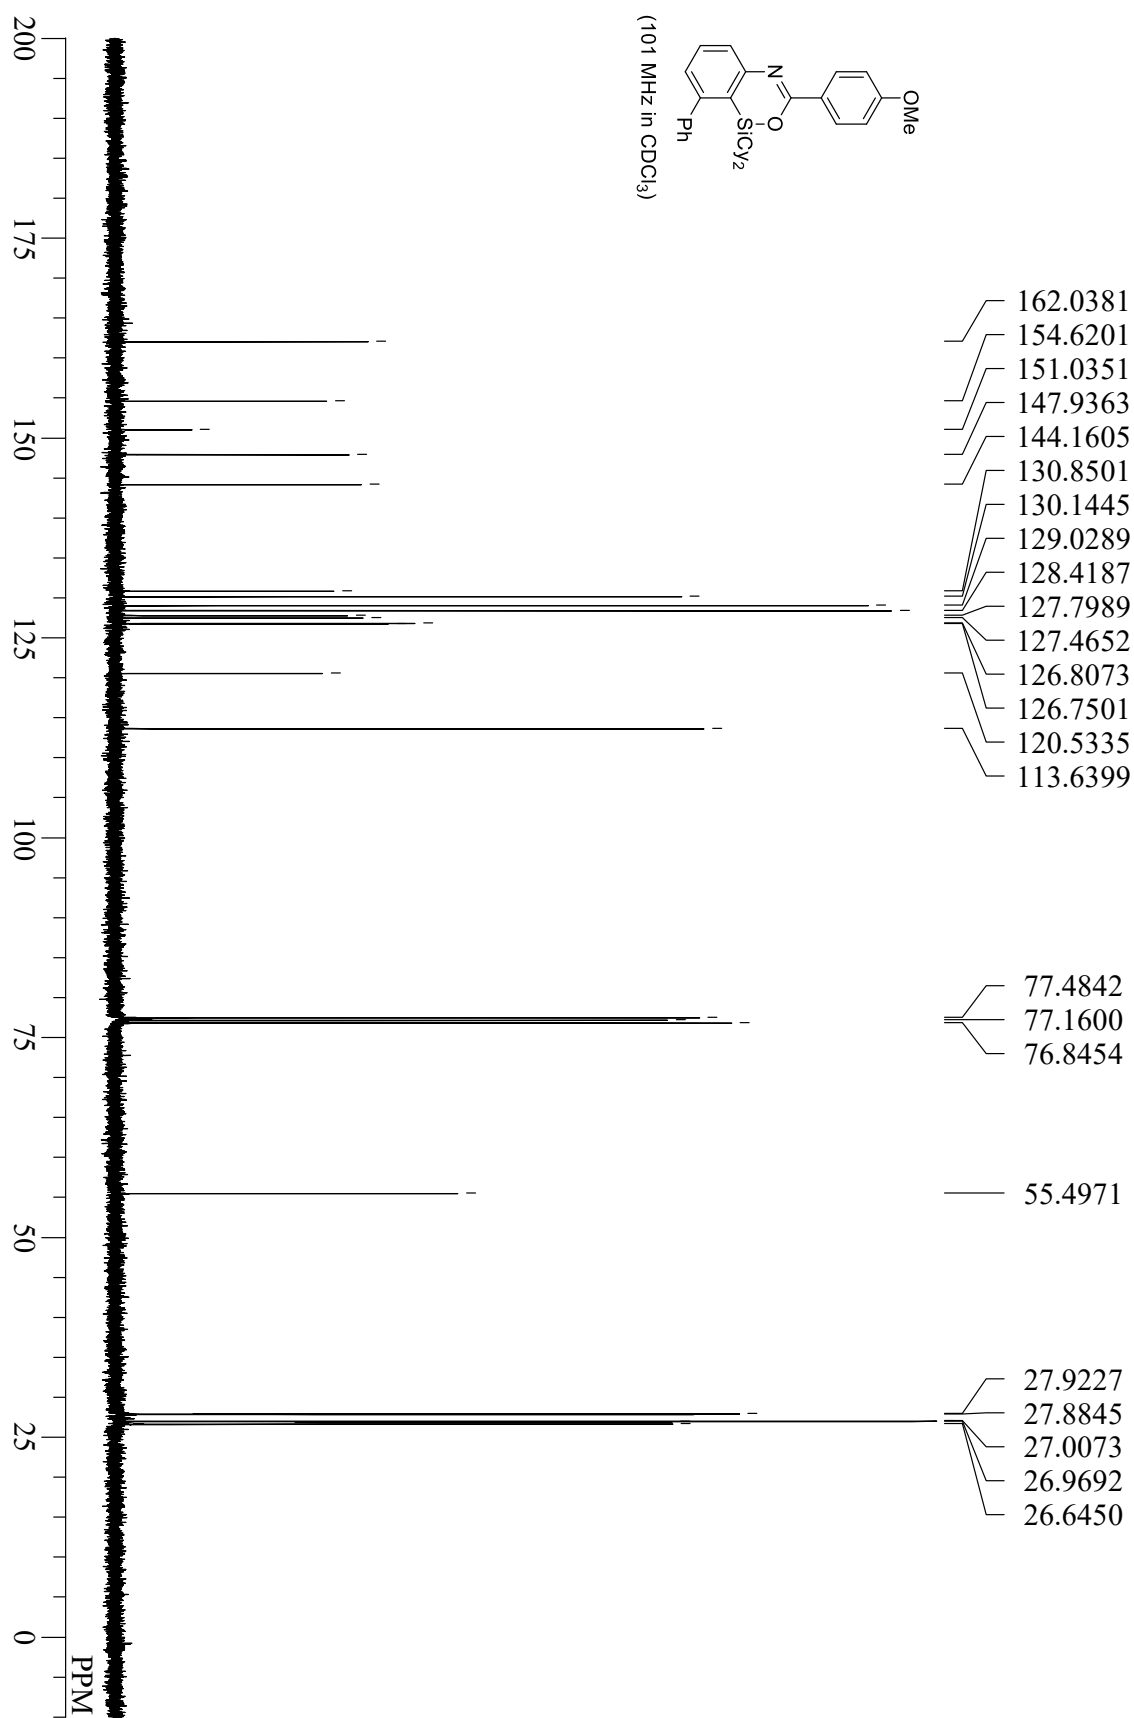

compound **3d**

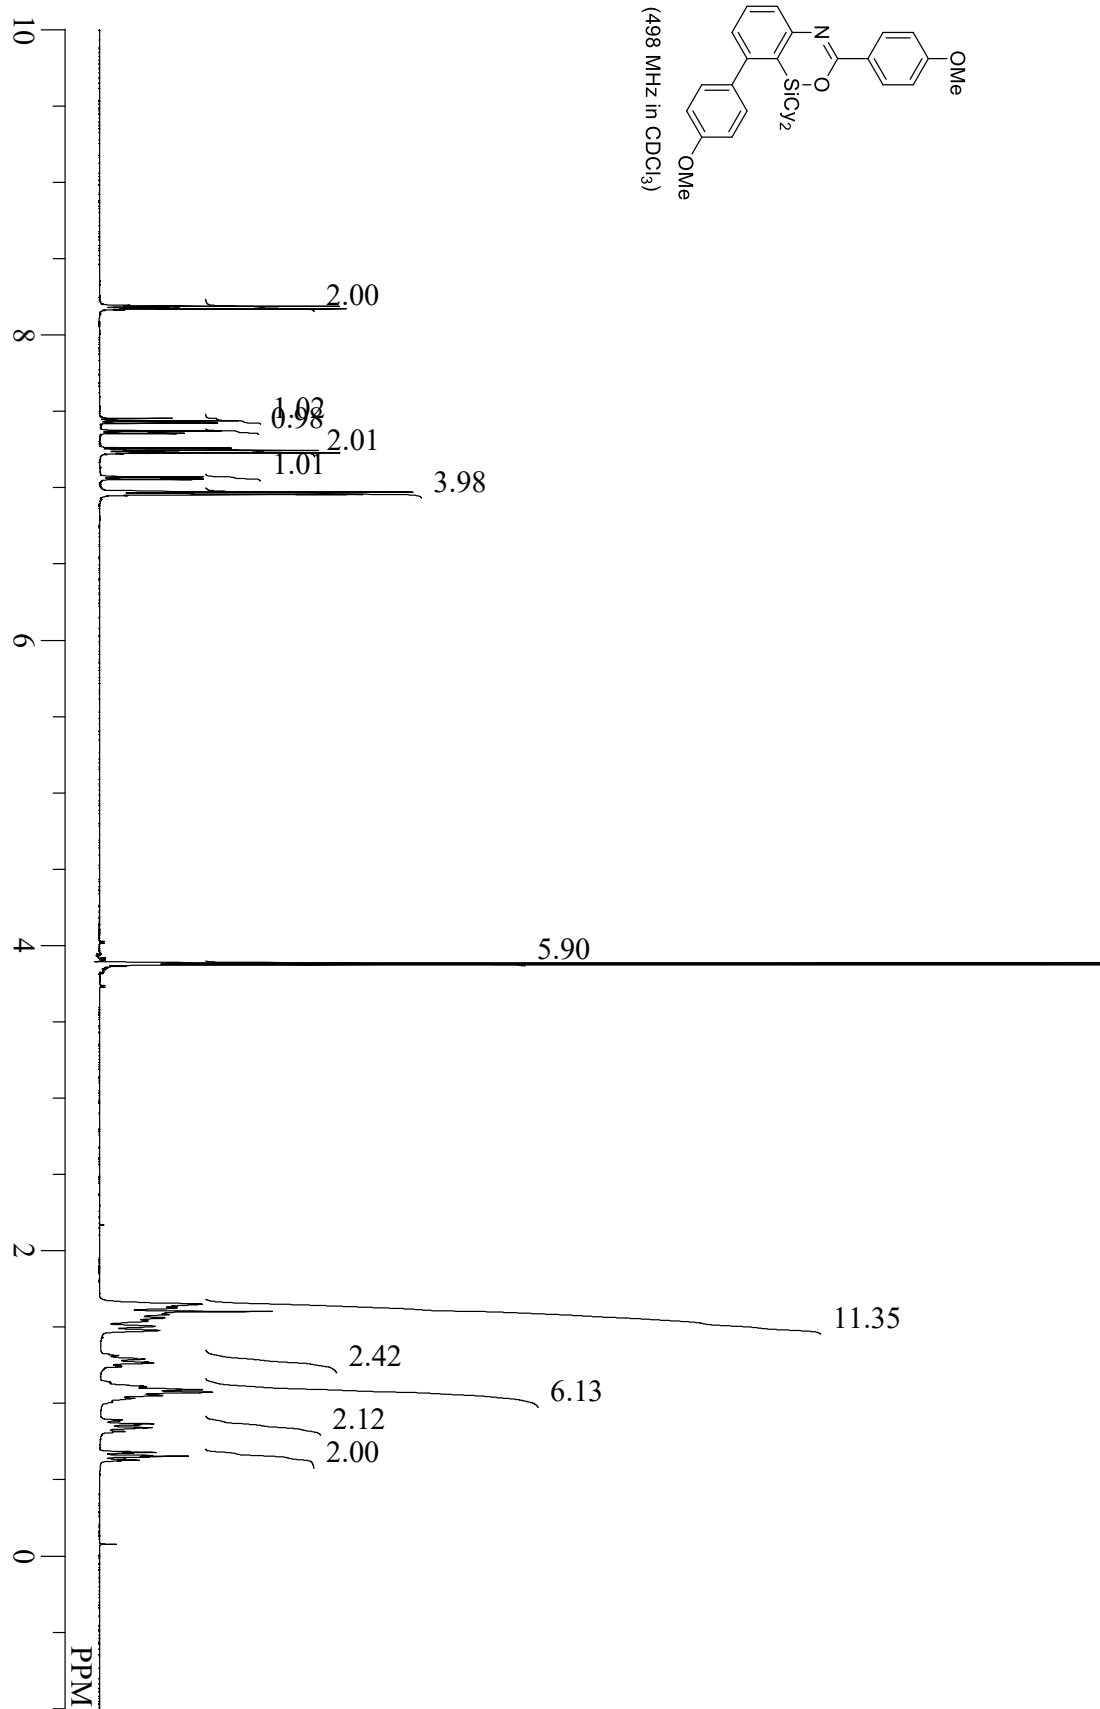

compound 3d

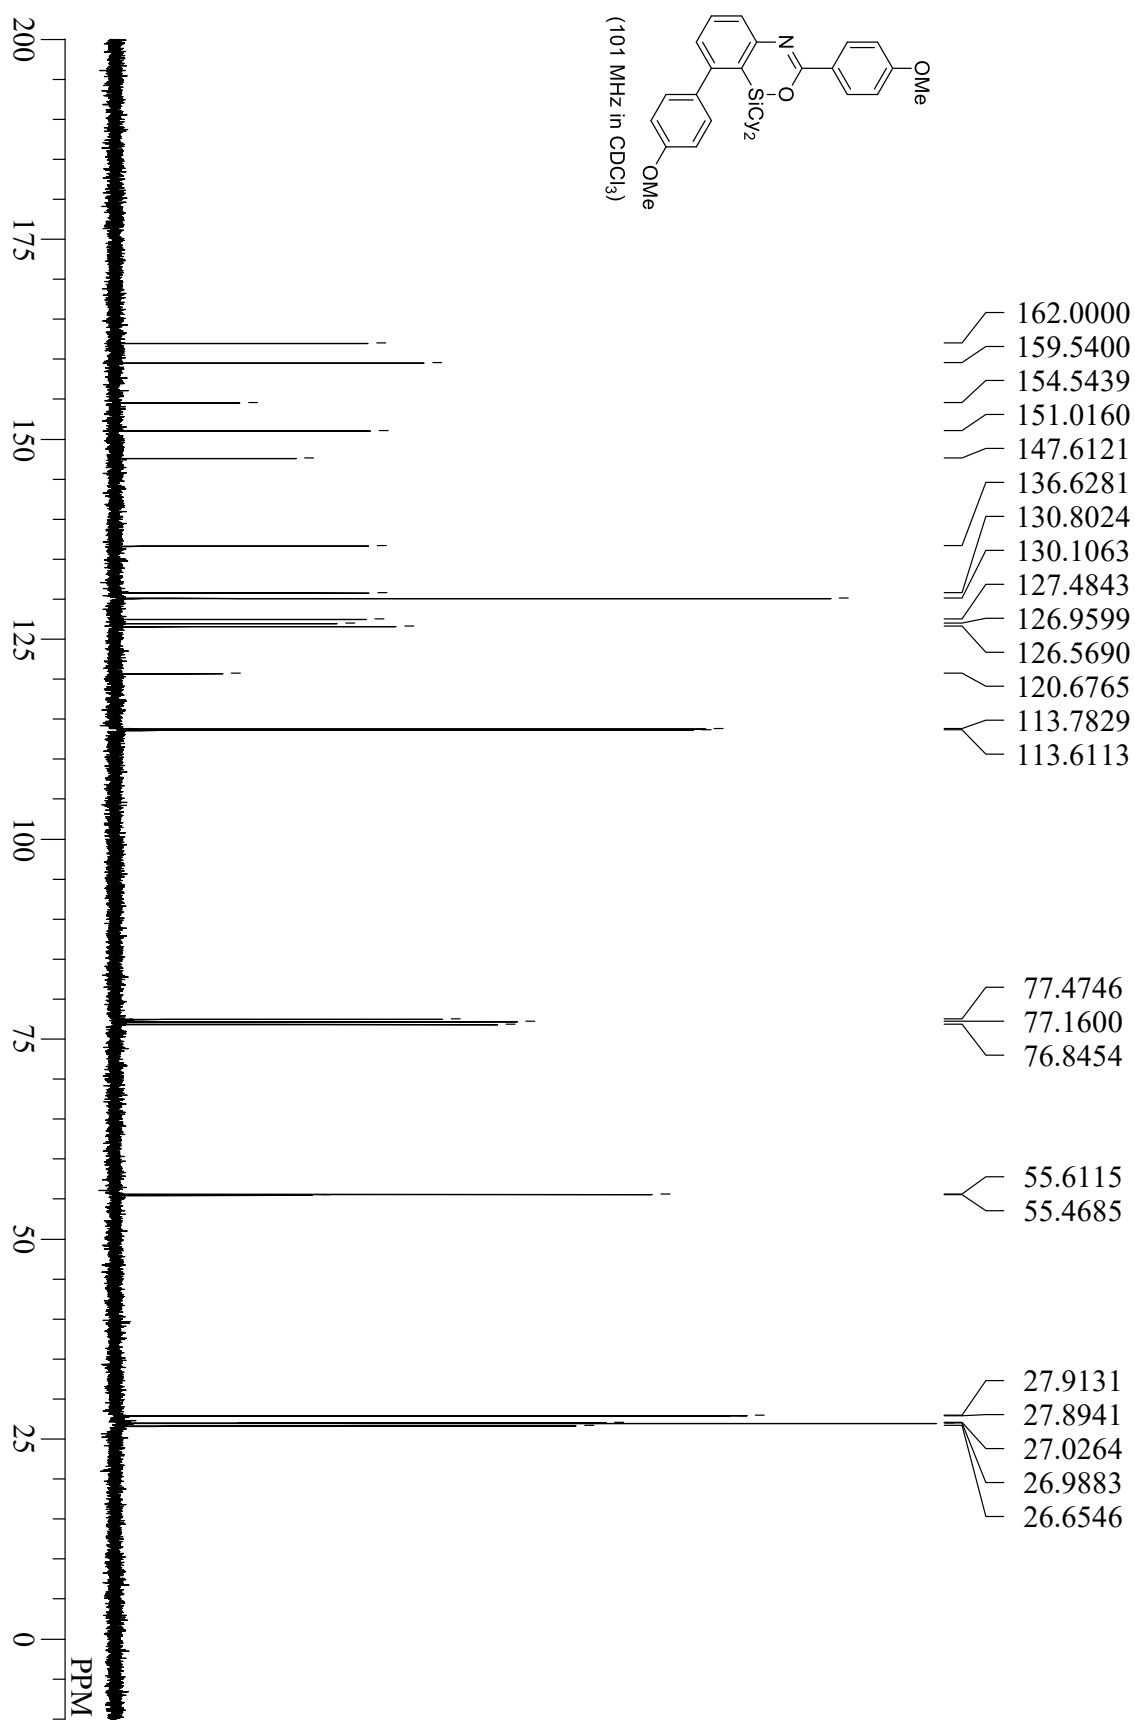

compound 3e

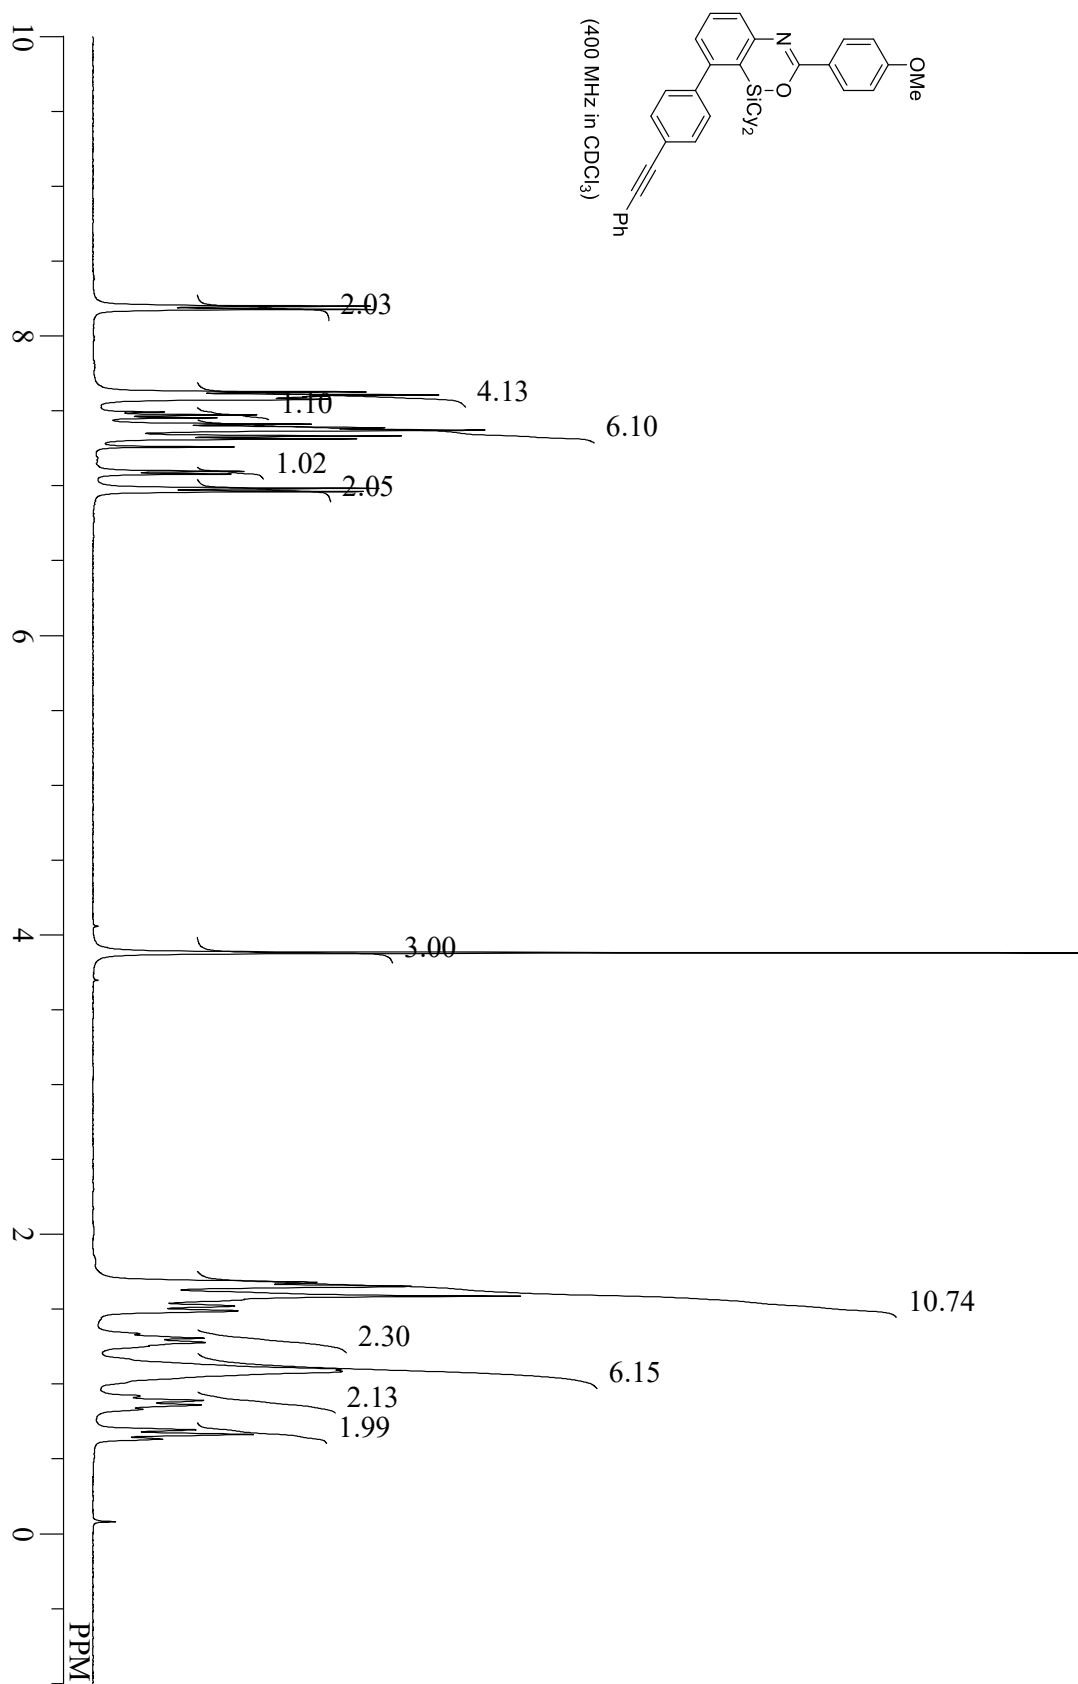

compound 3e

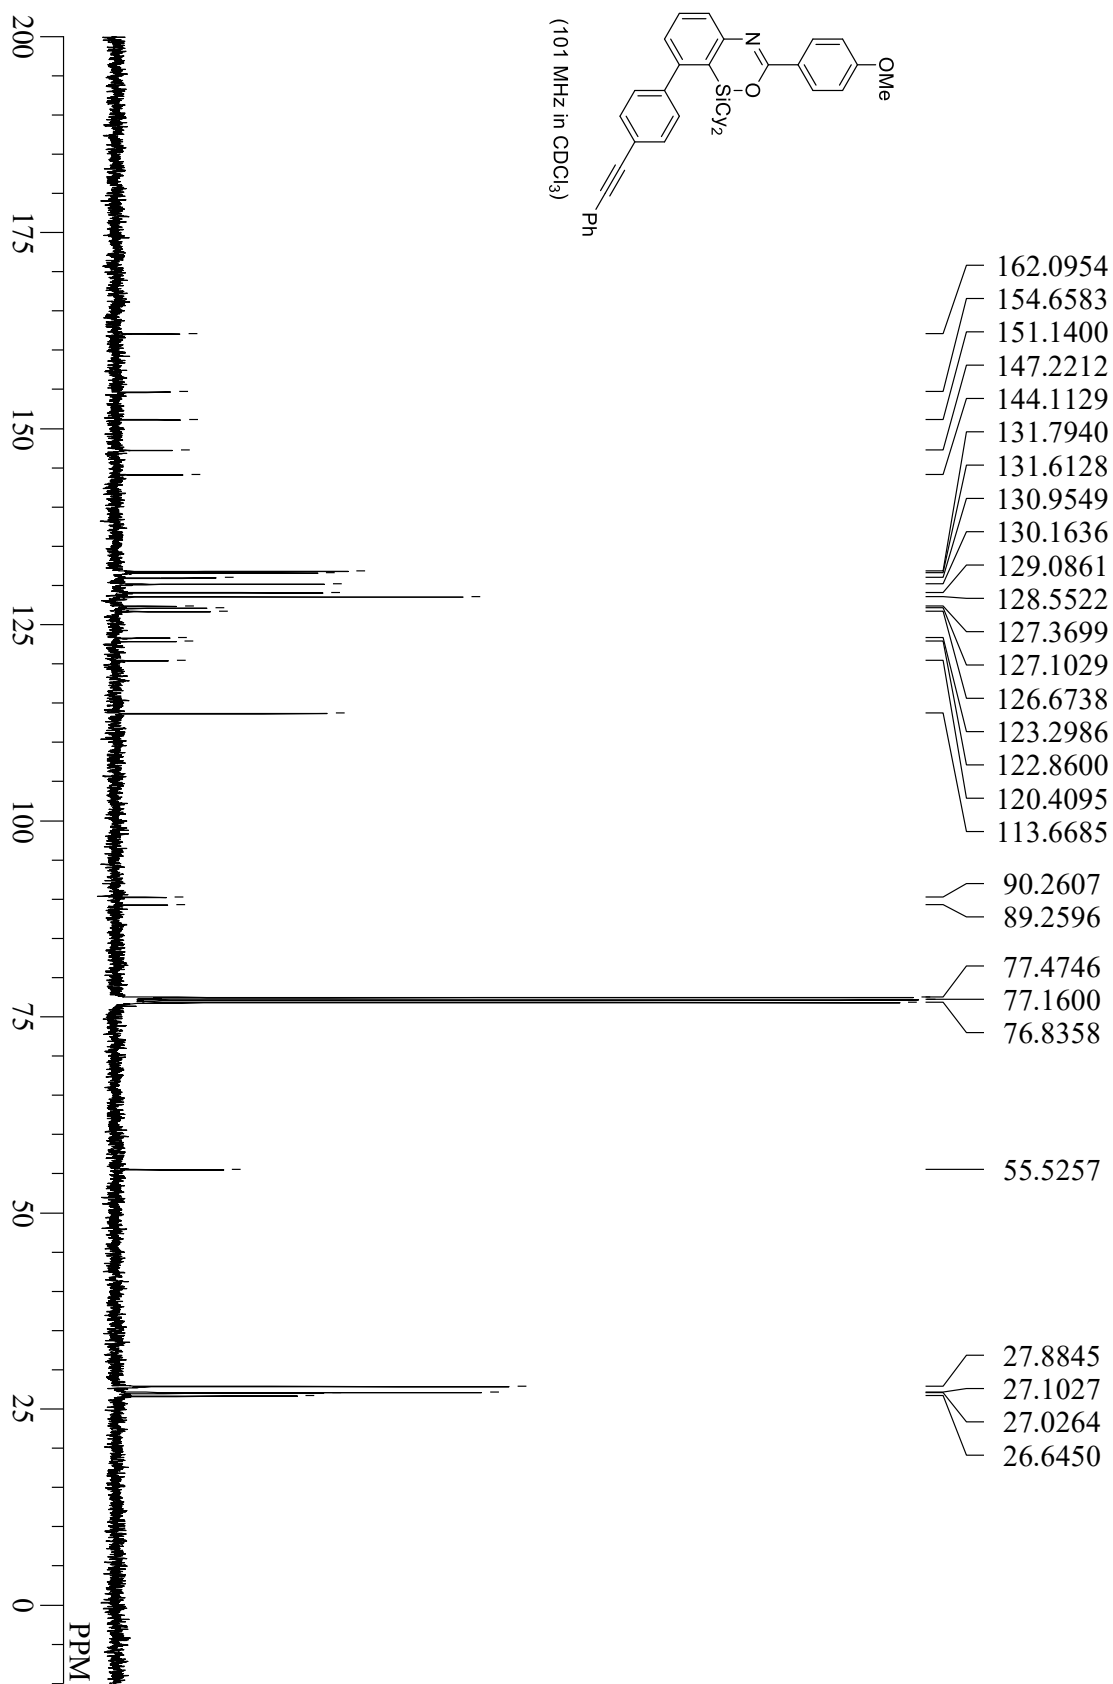



compound **3f**

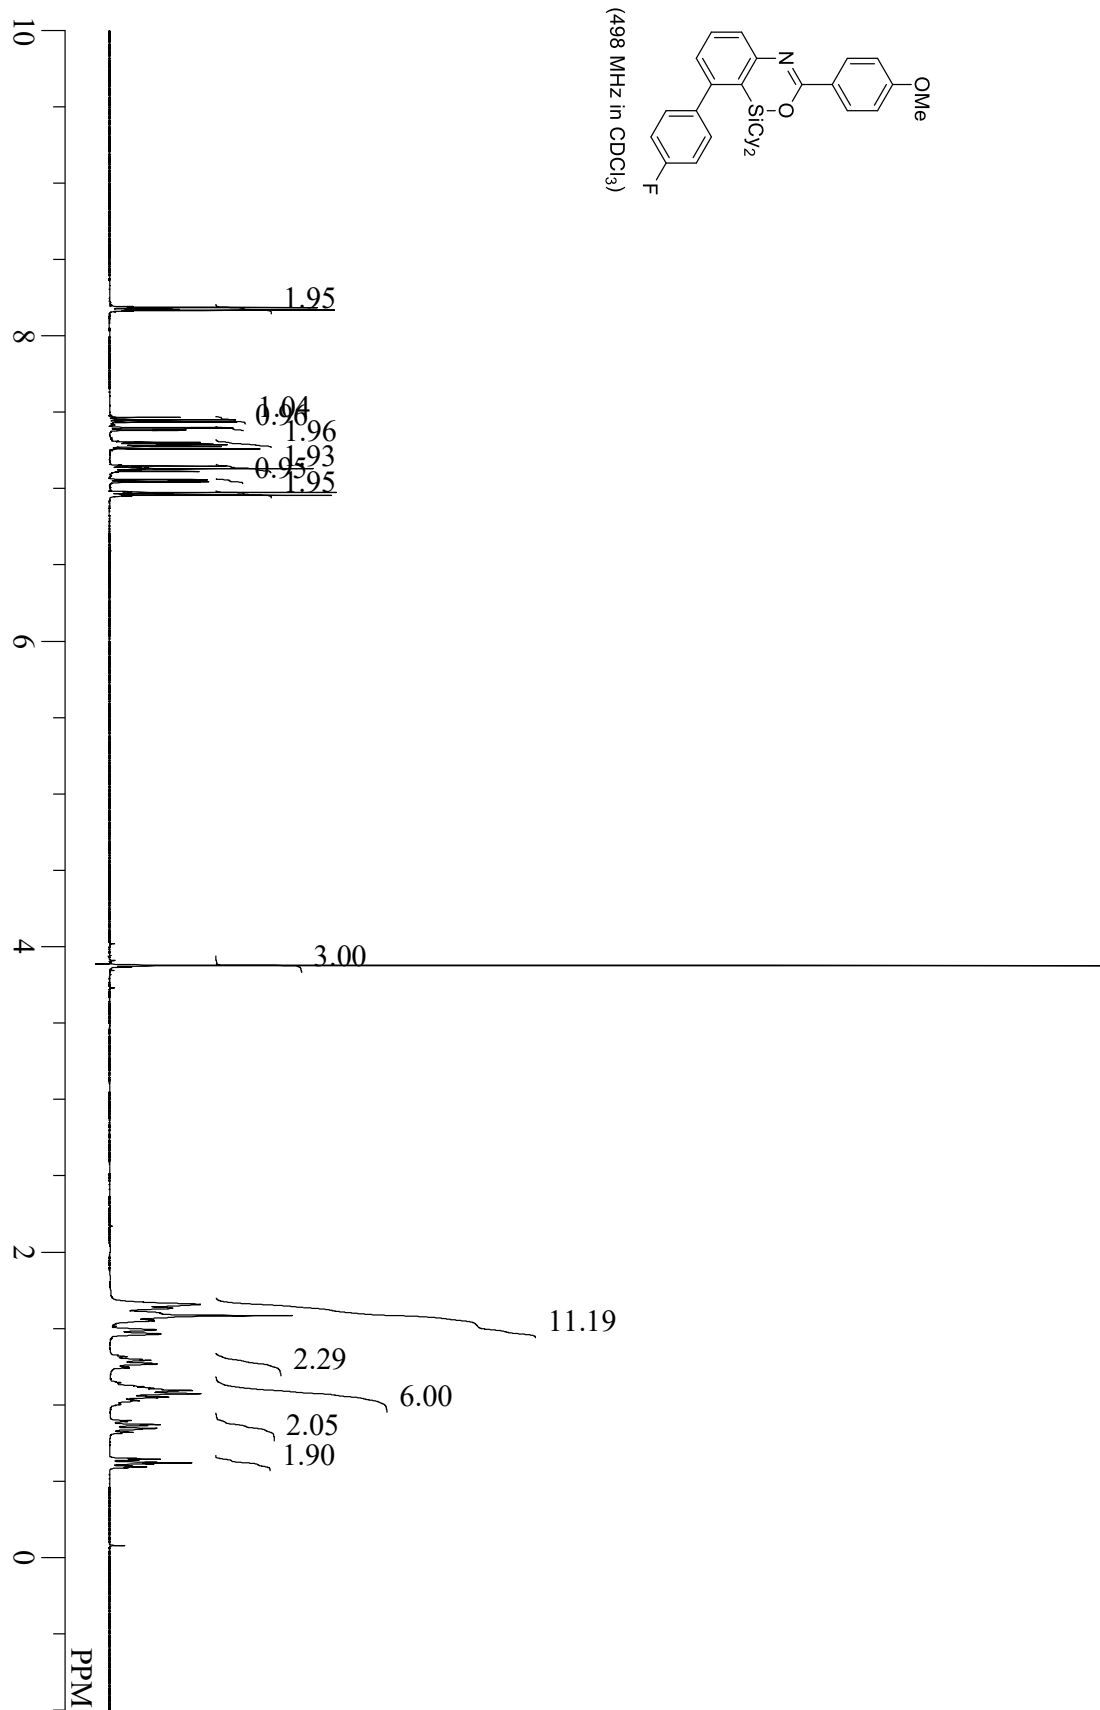

compound 3f

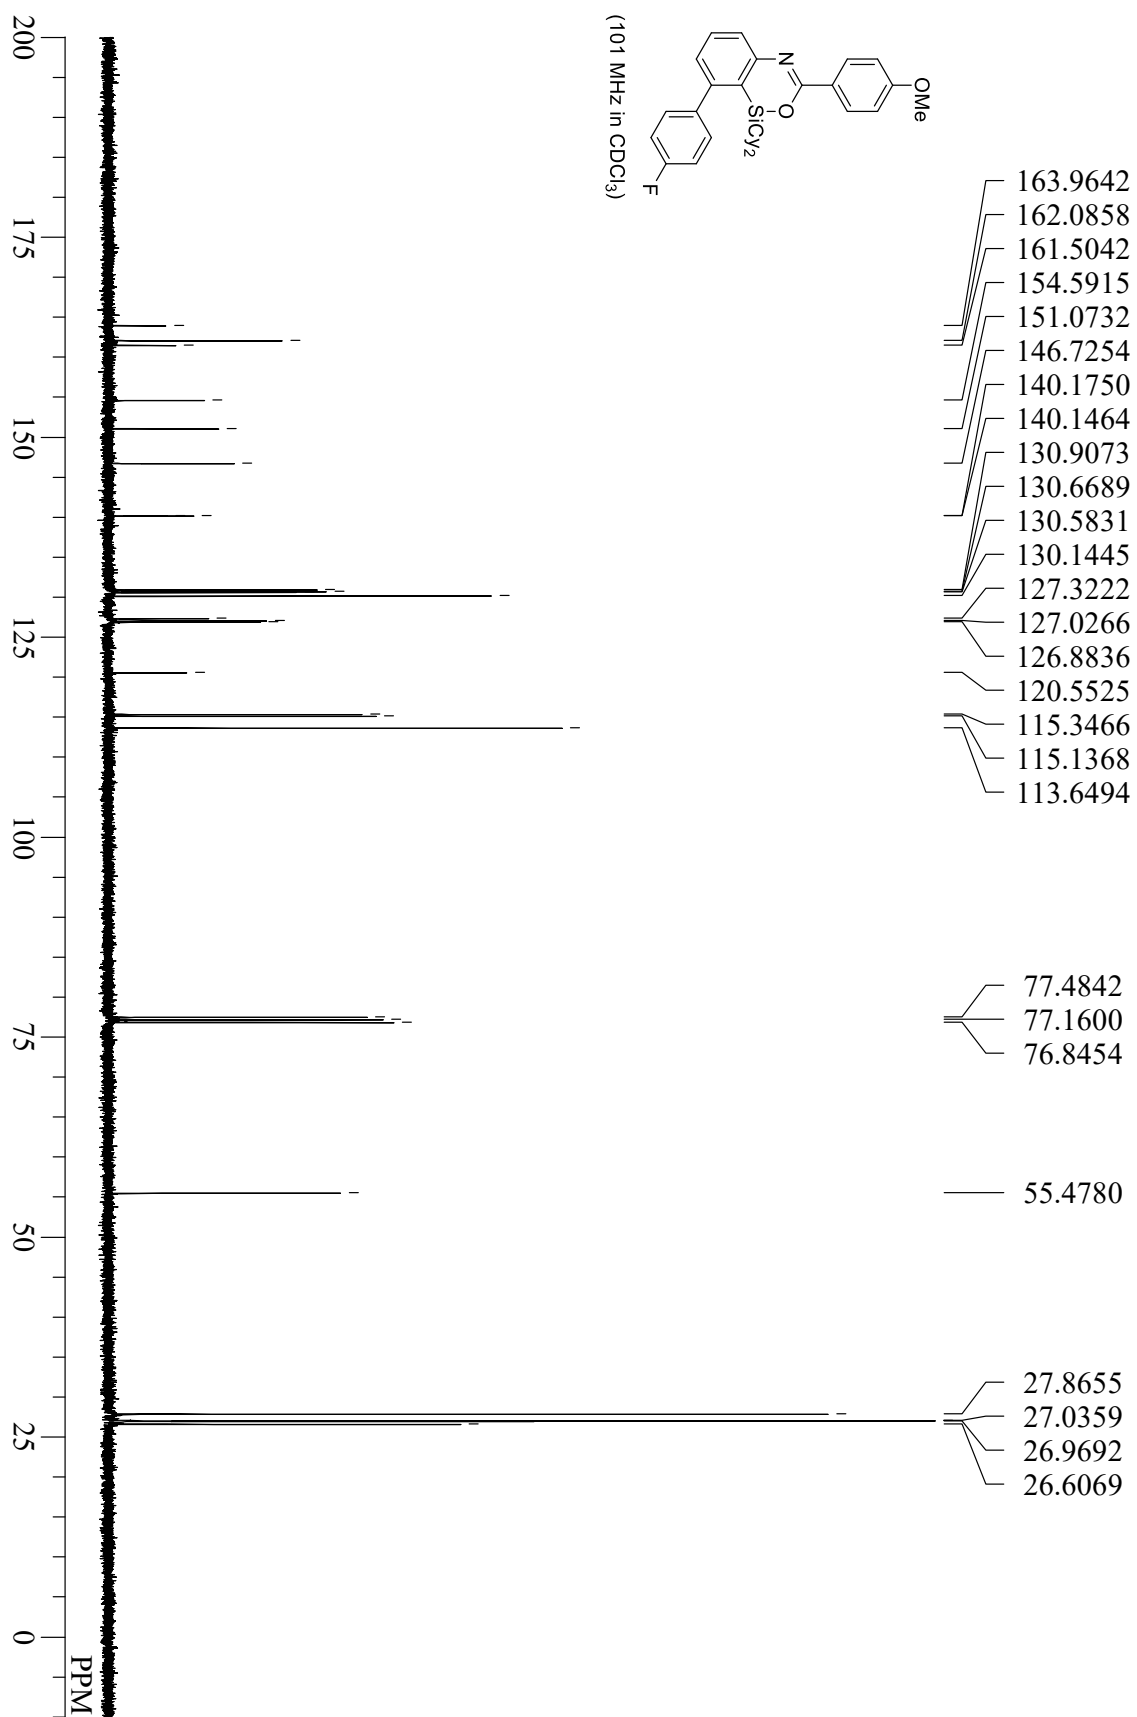

compound **3g**

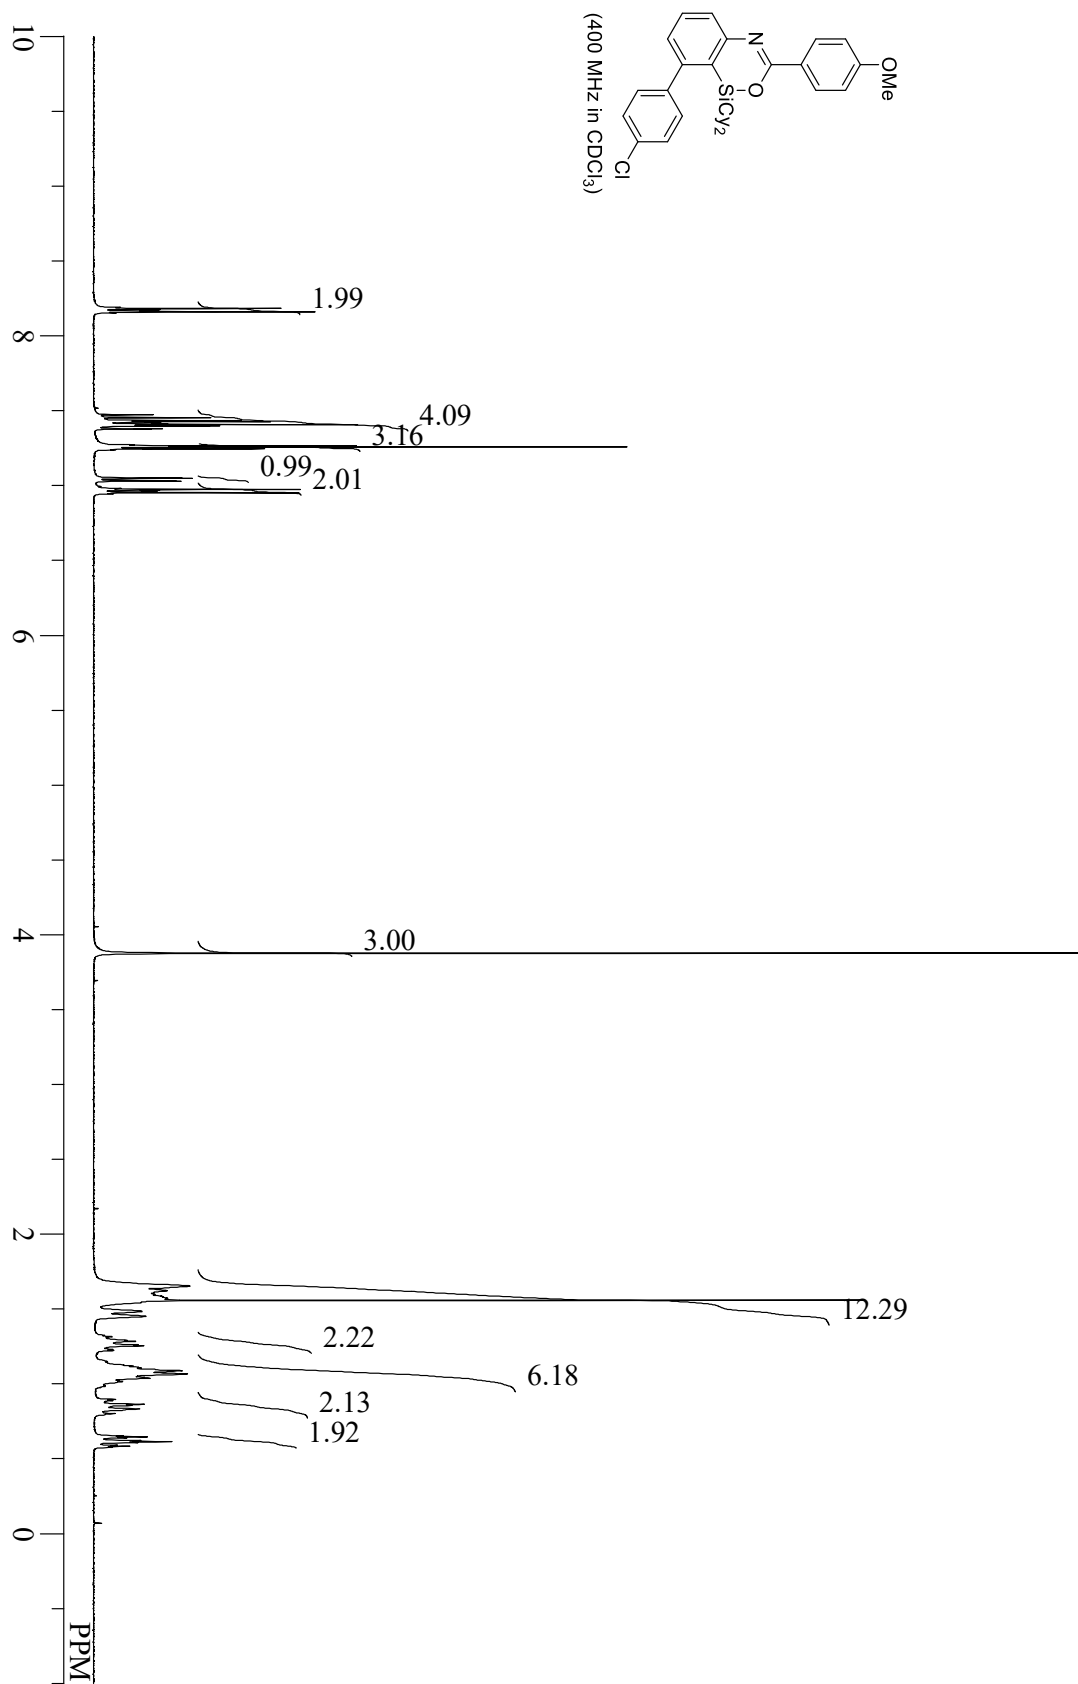

compound 3g

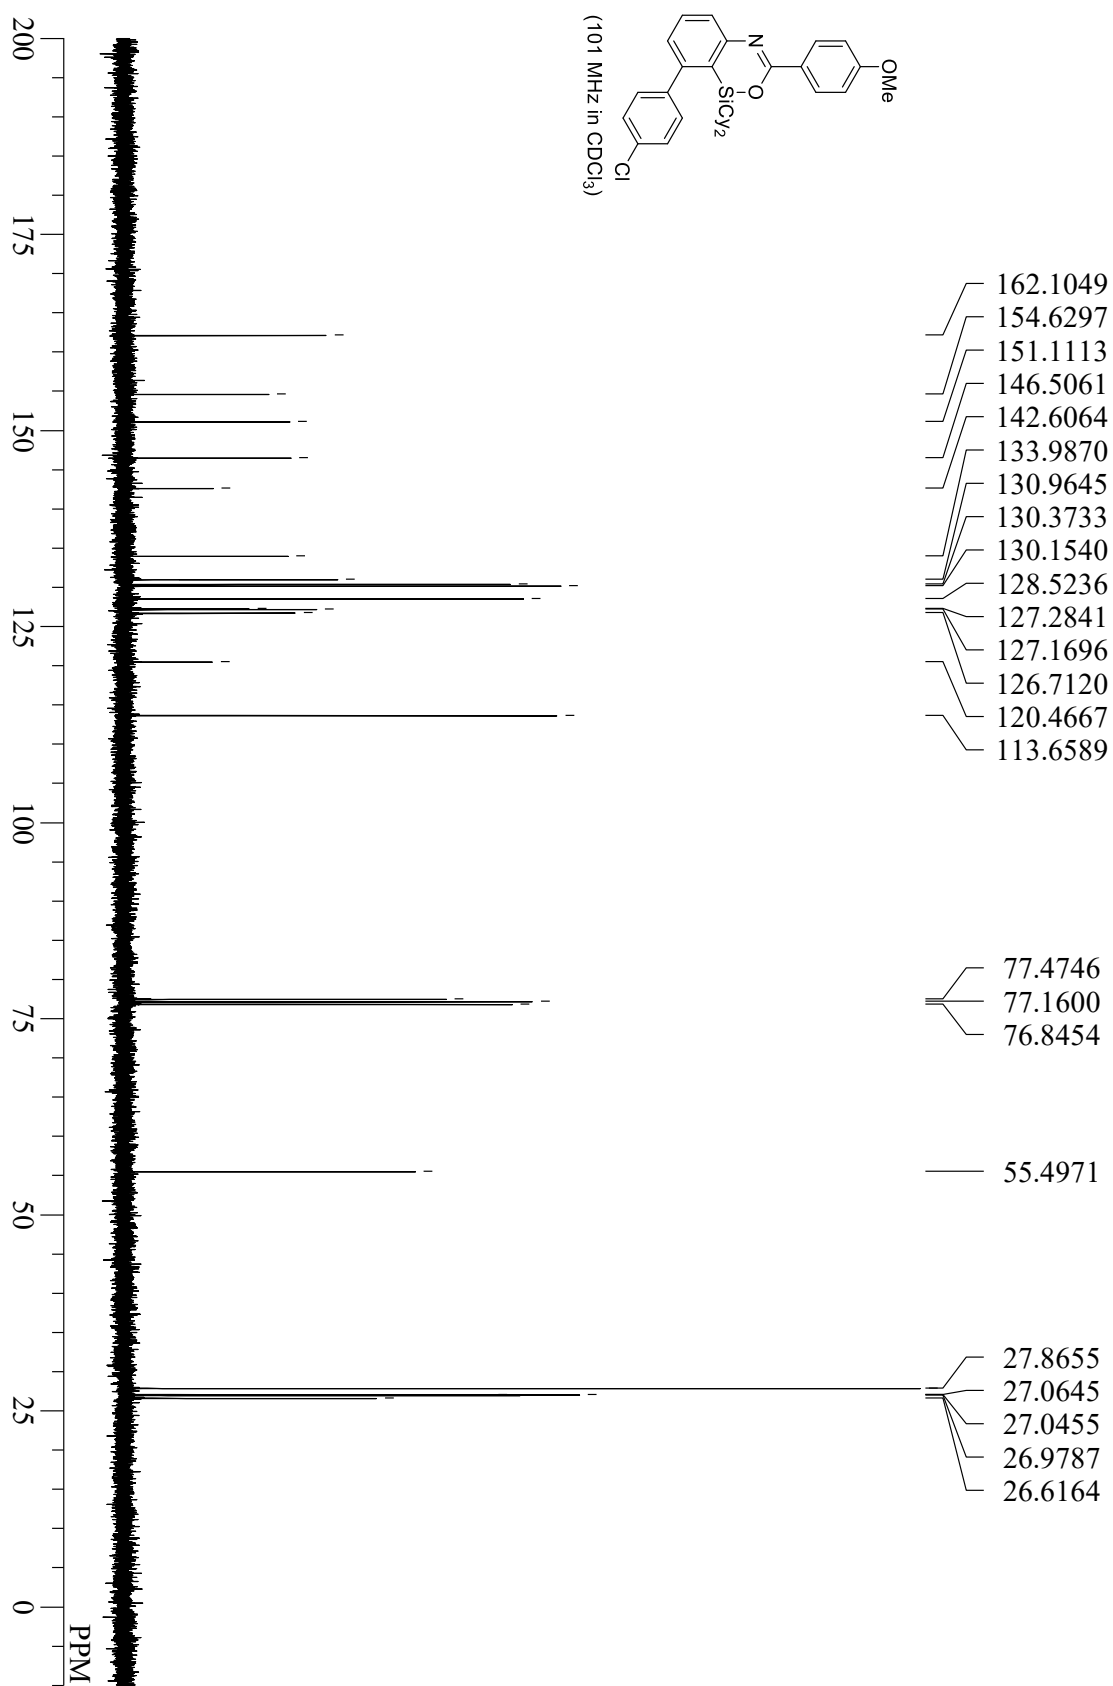

compound **3h**

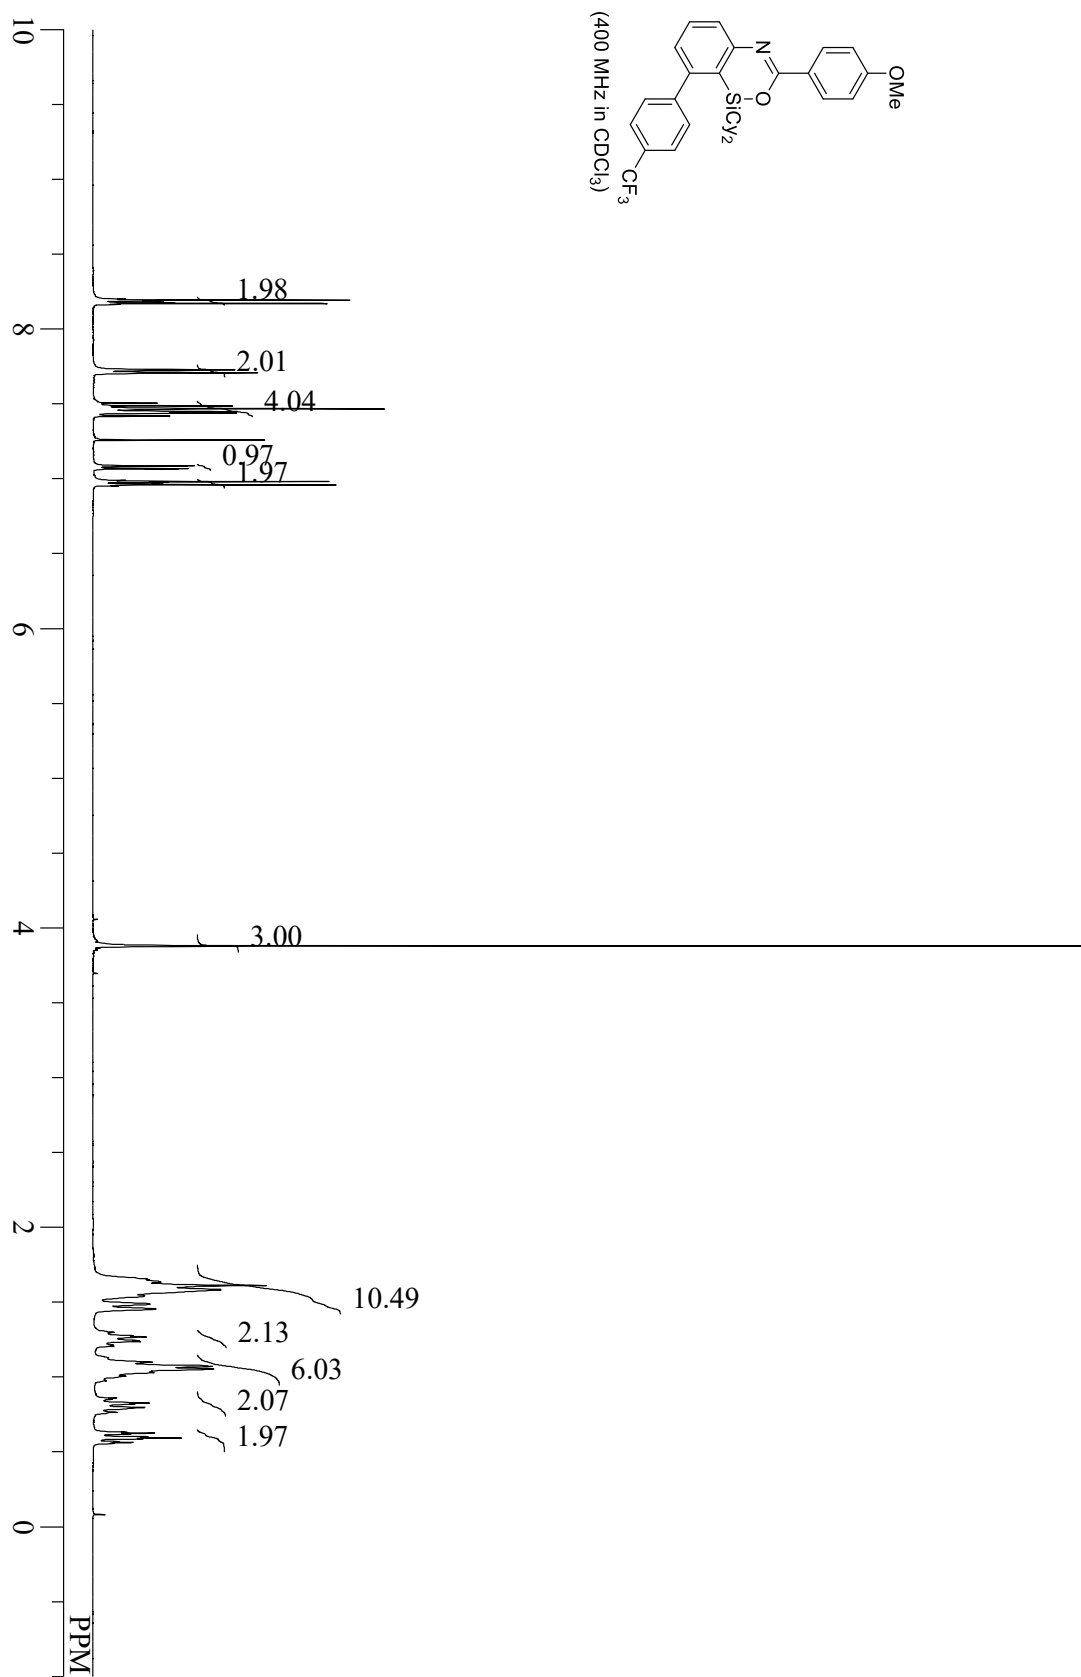

compound 3h

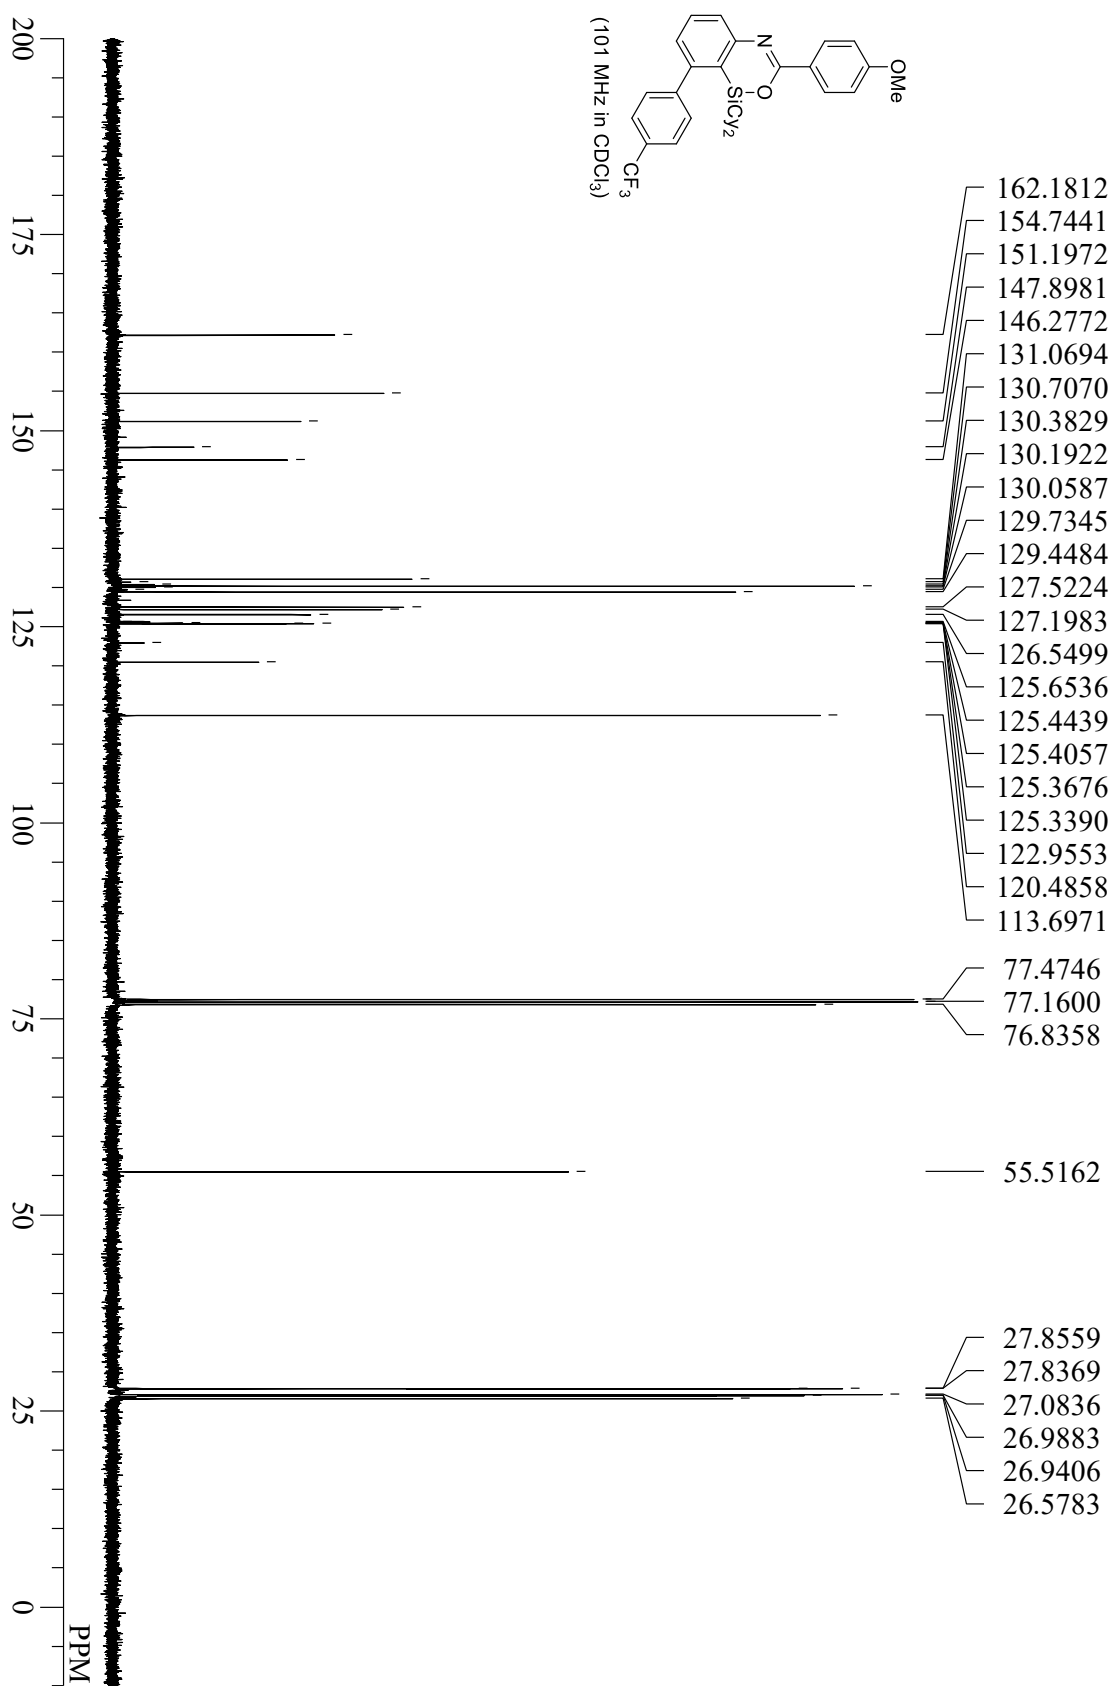

compound 3i

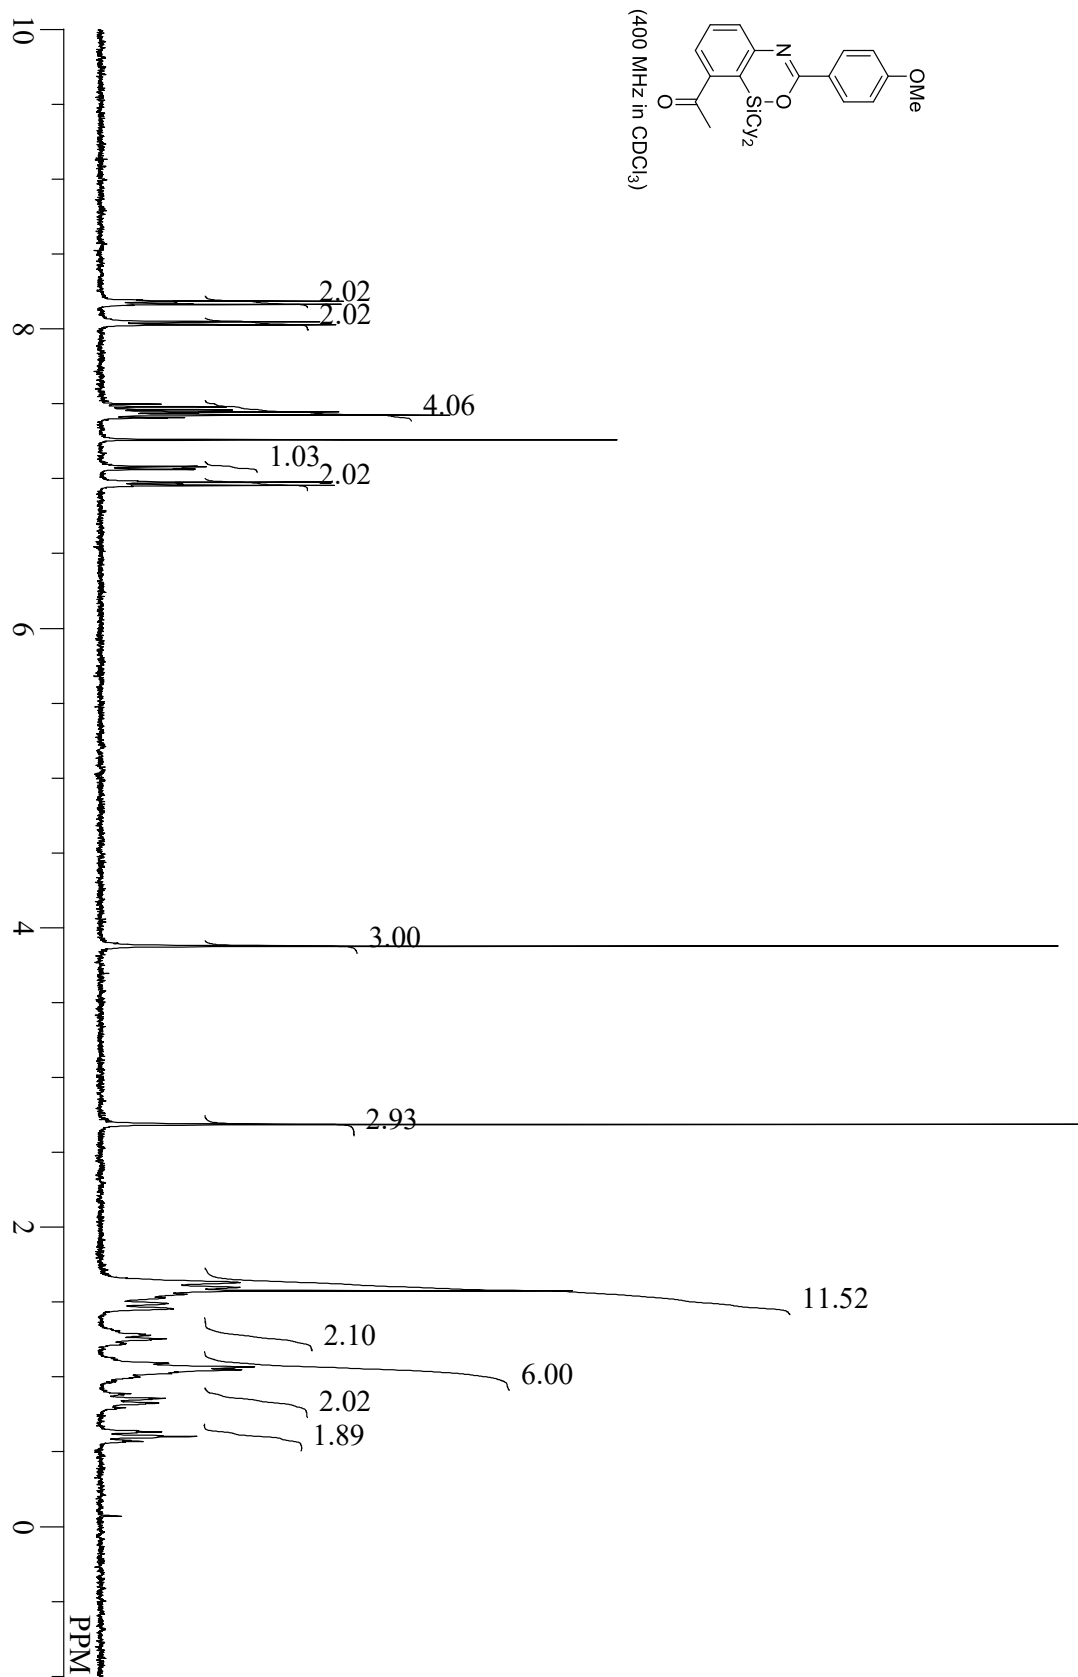

compound 3i

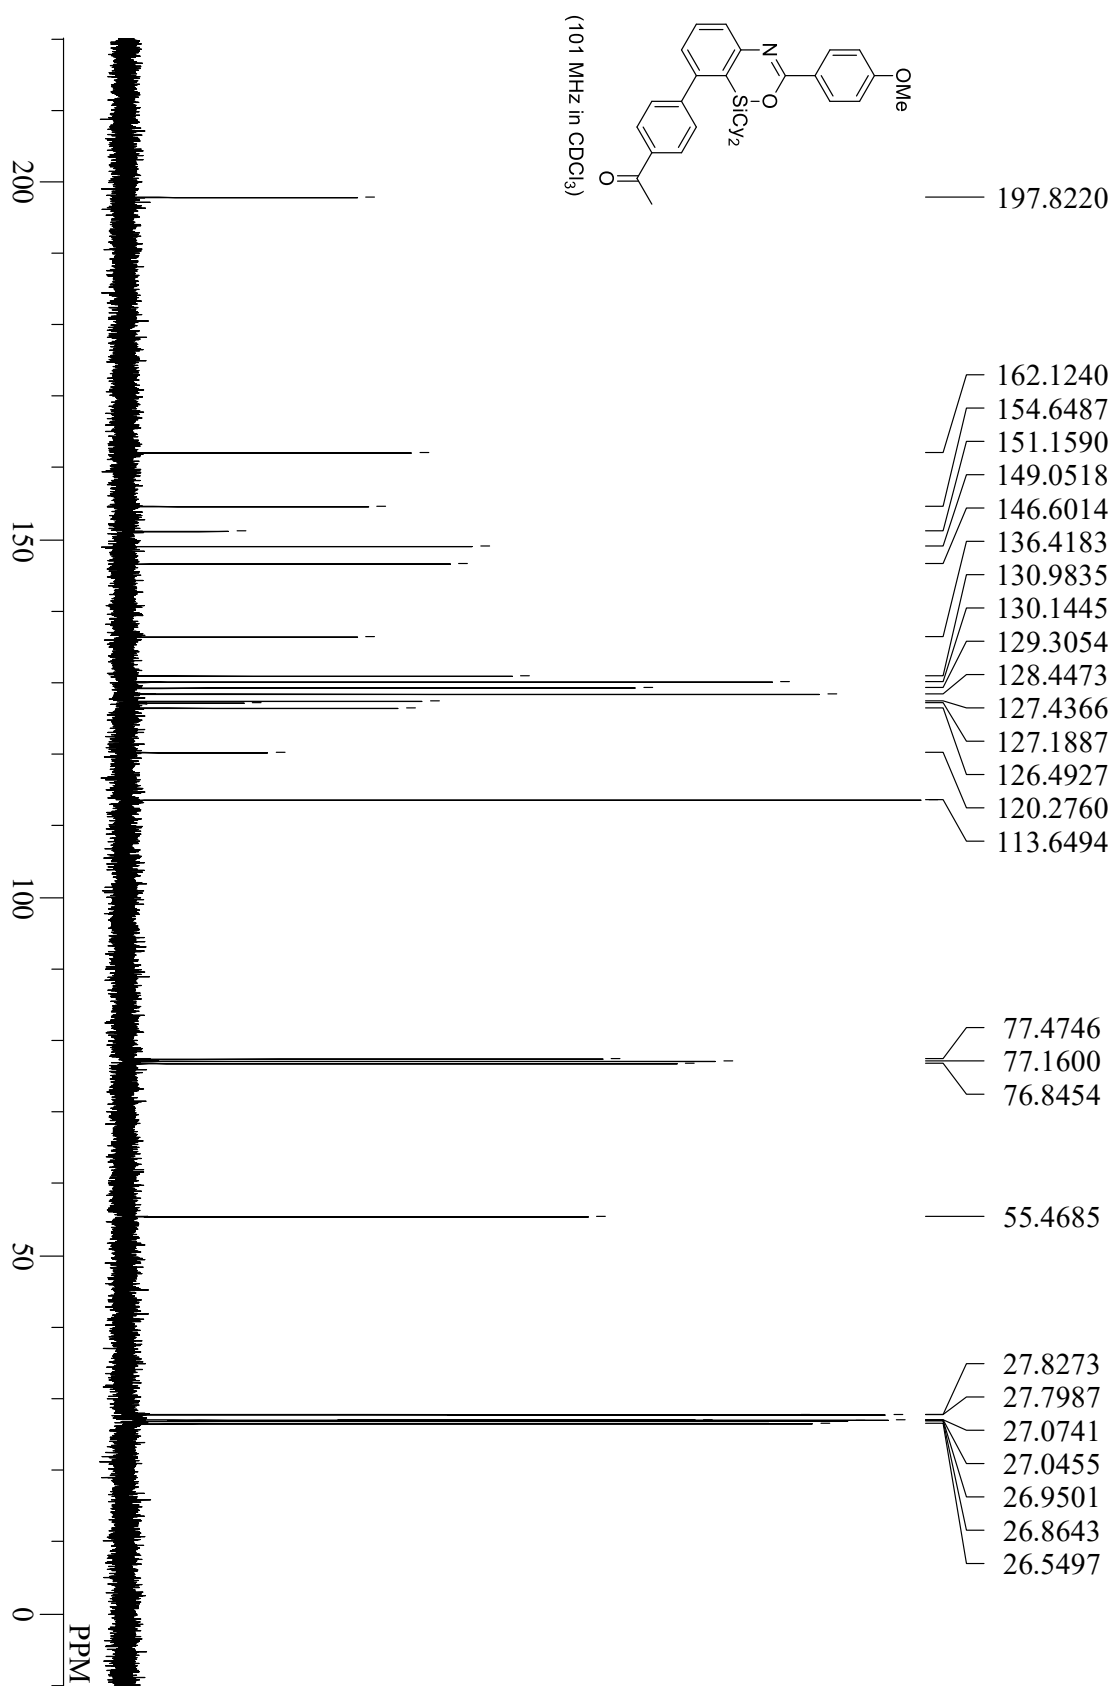



compound **3j**

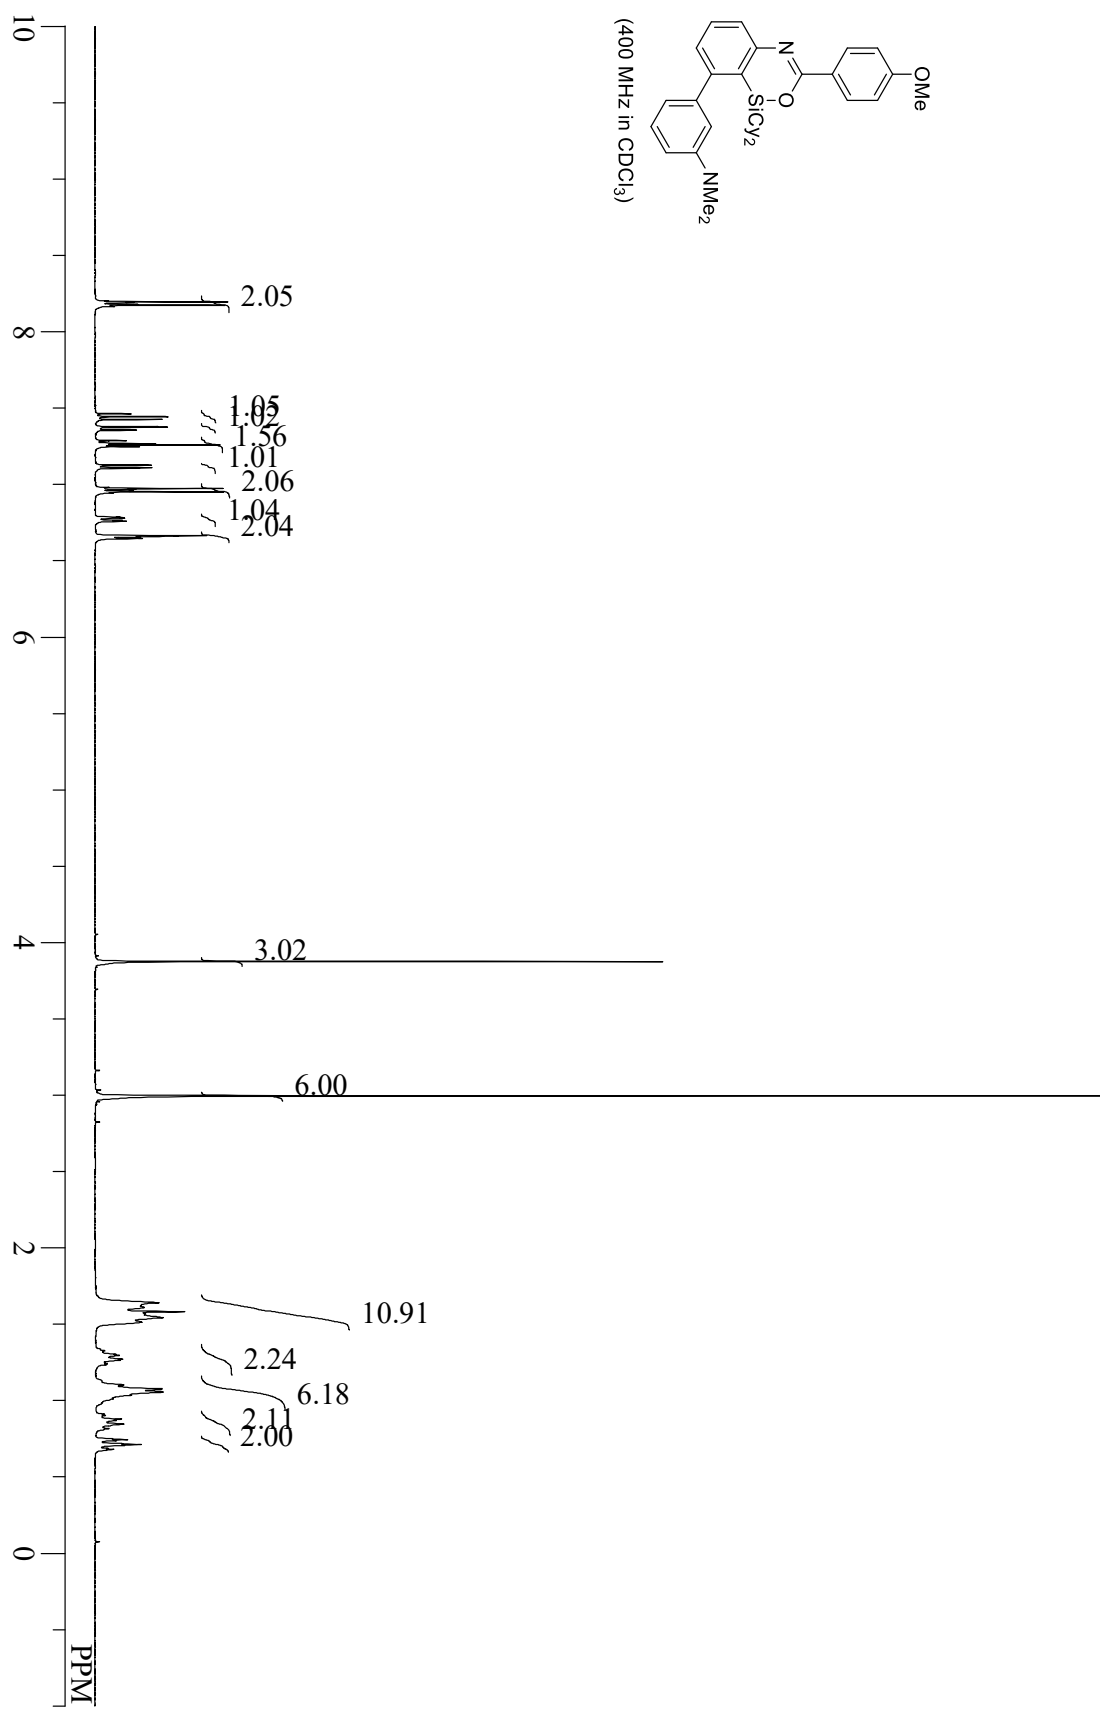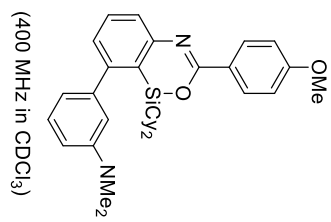

compound 3j

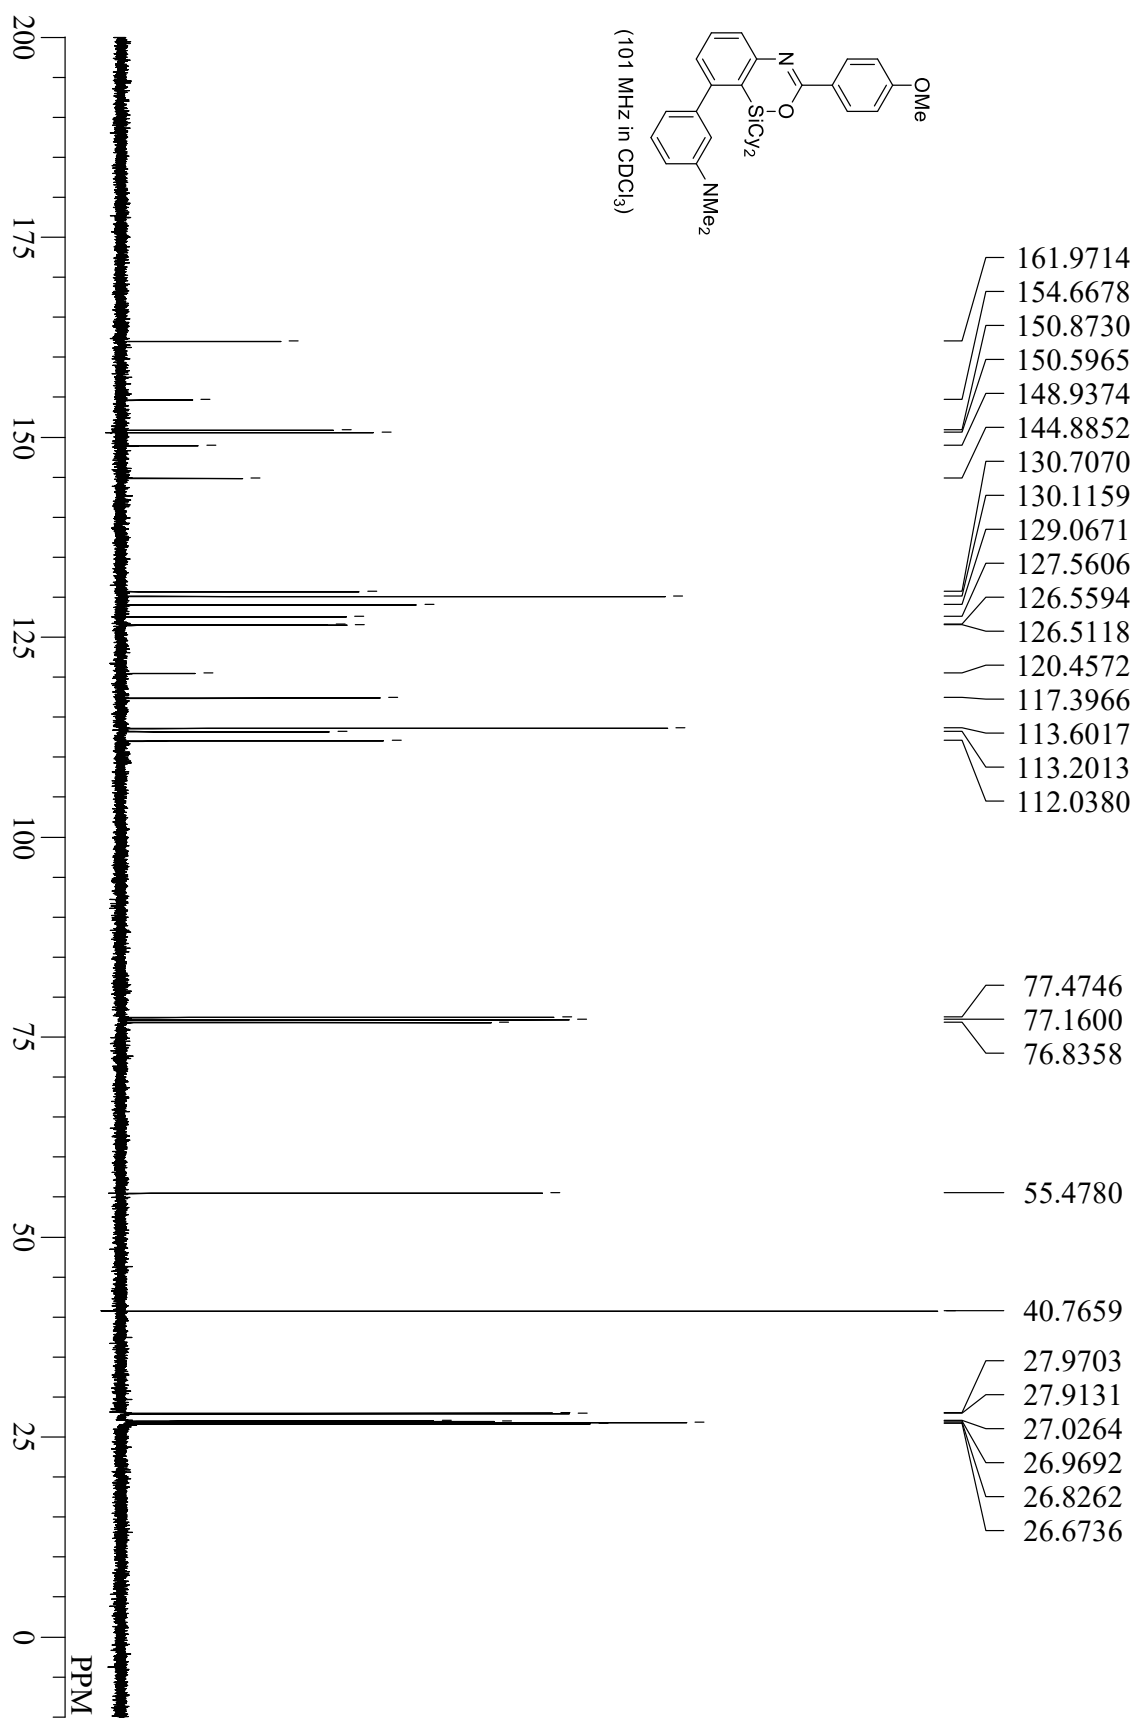

compound **3k**

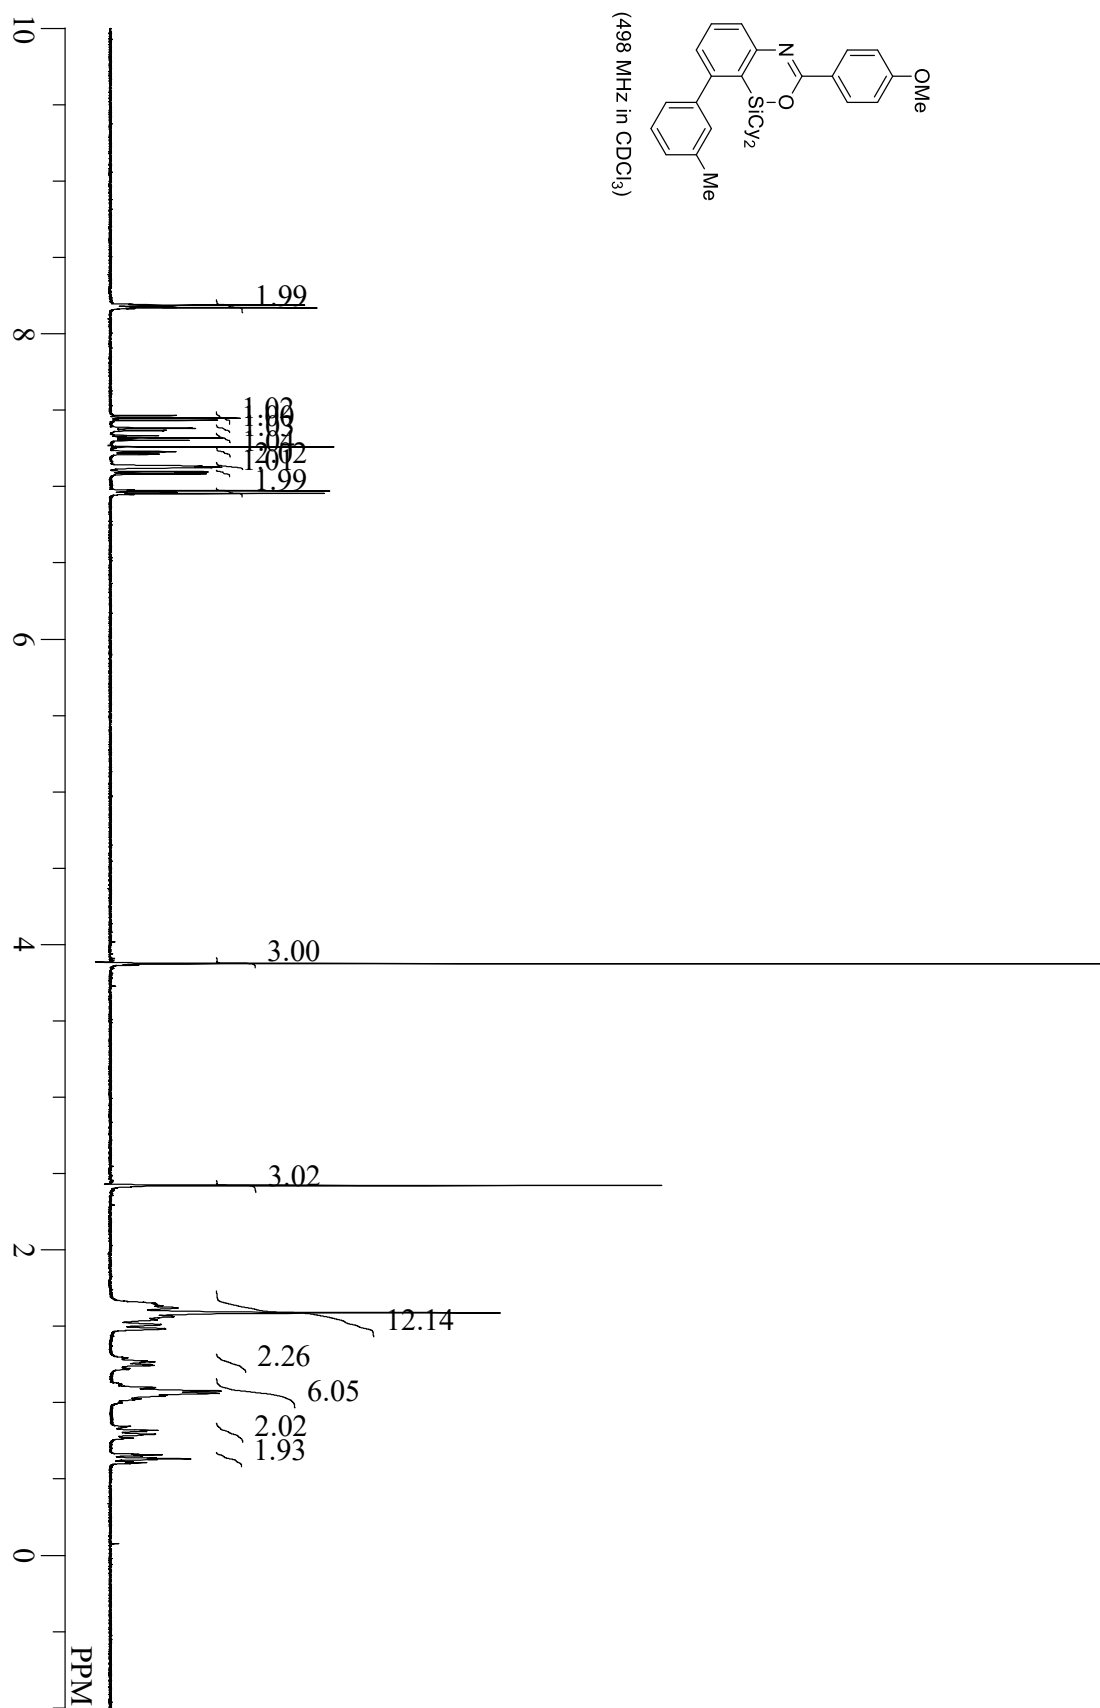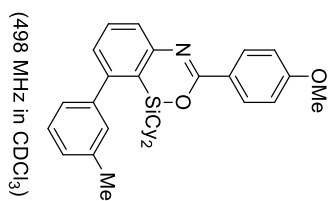

compound 3k

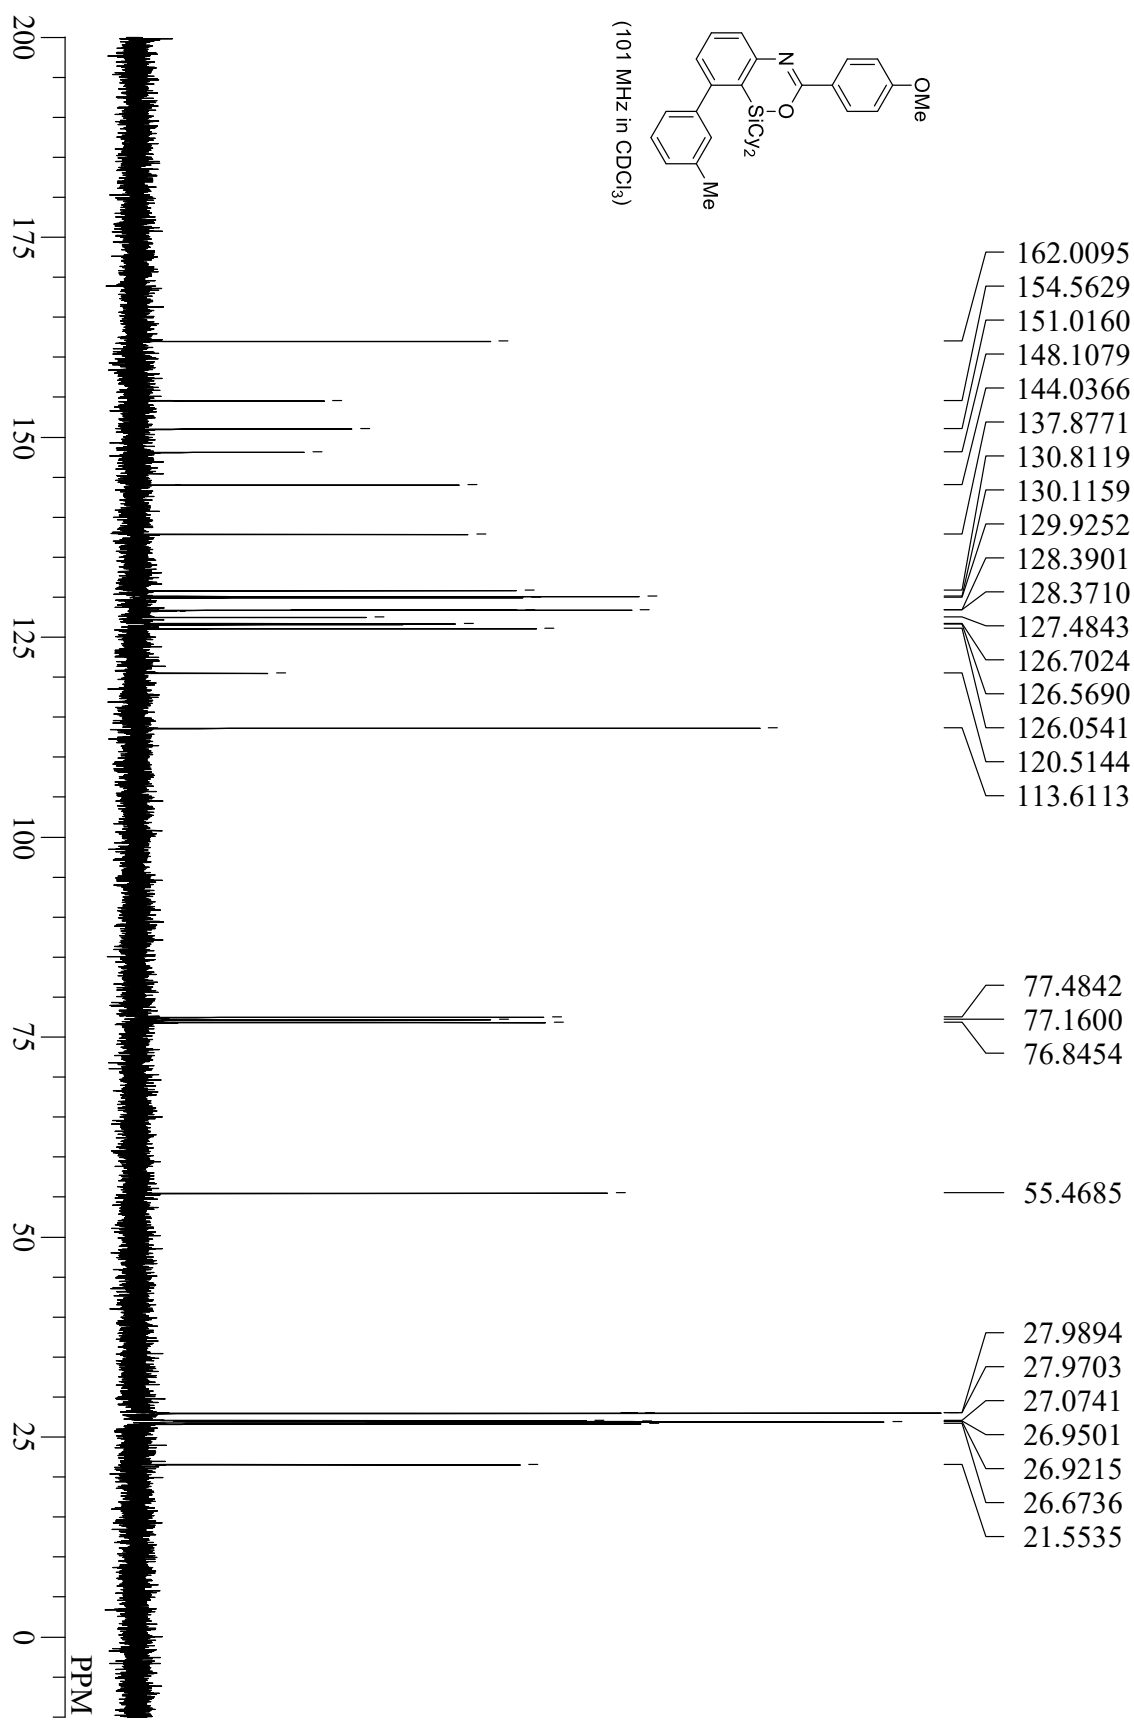

compound **31**

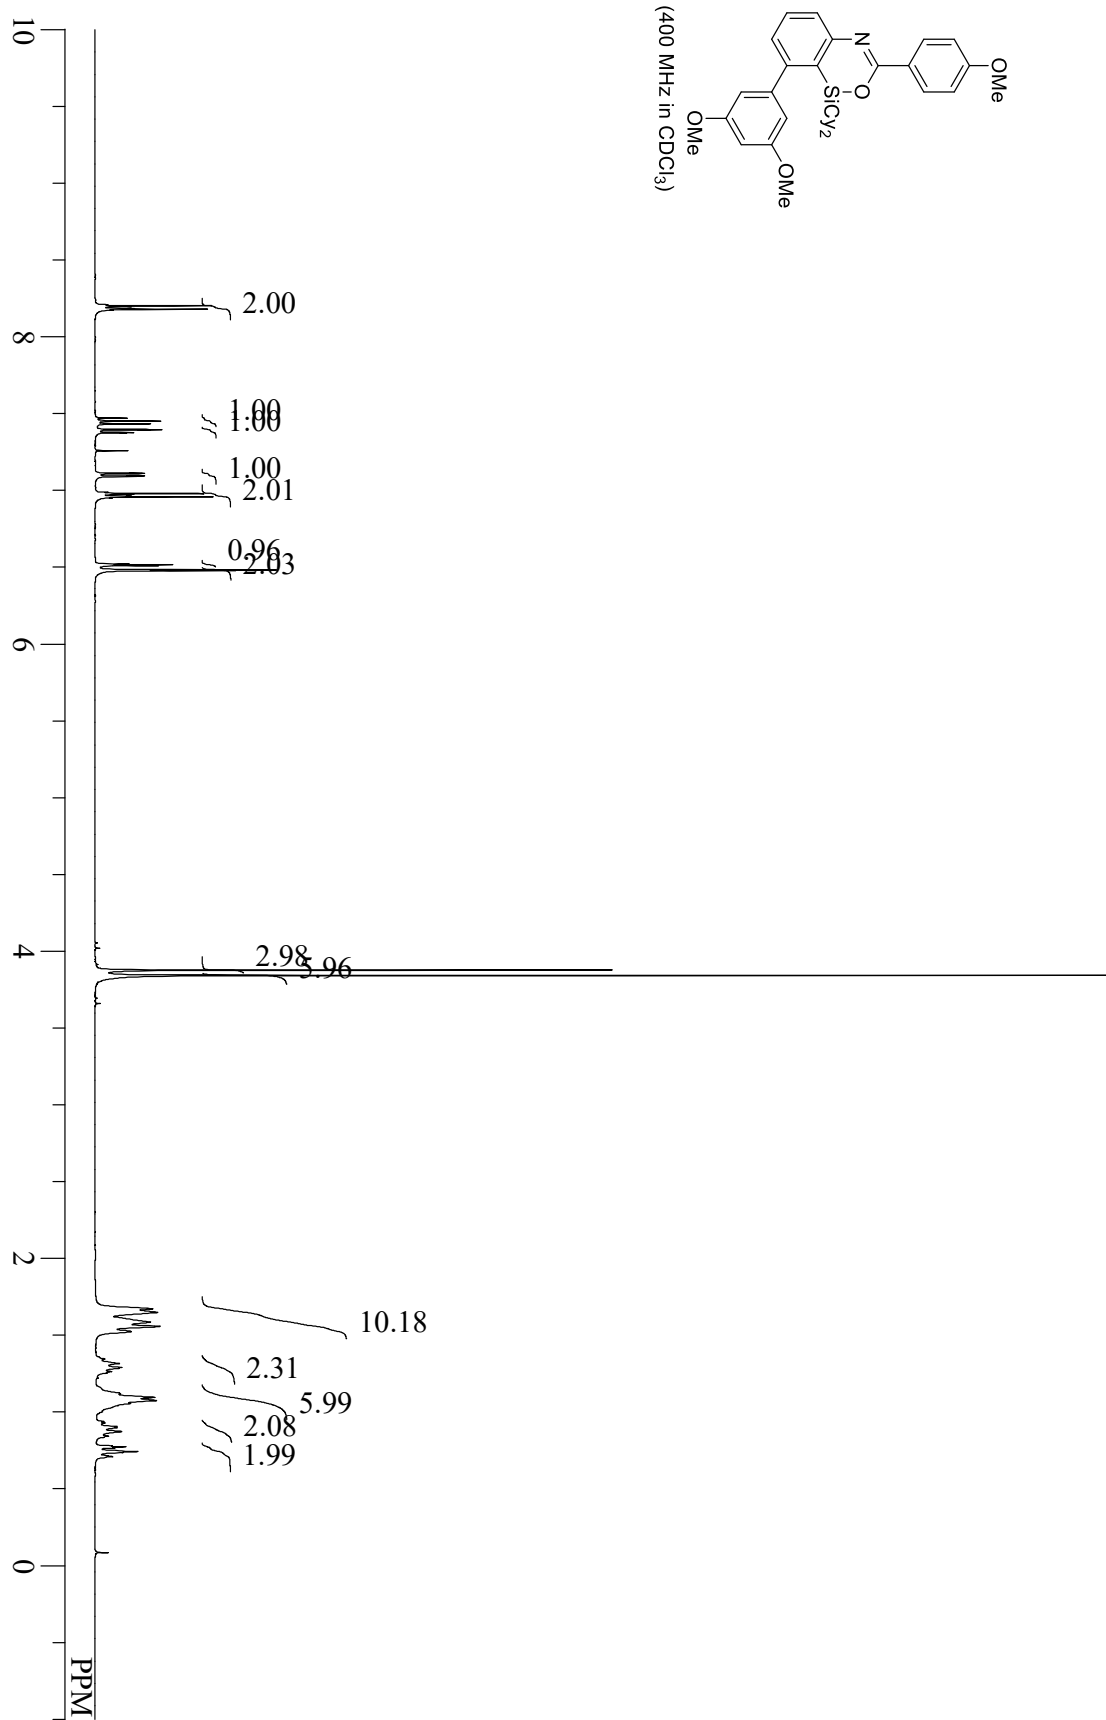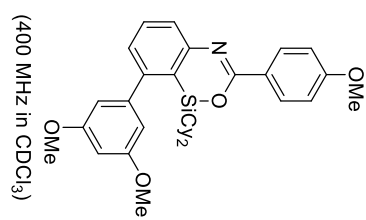

compound 3I

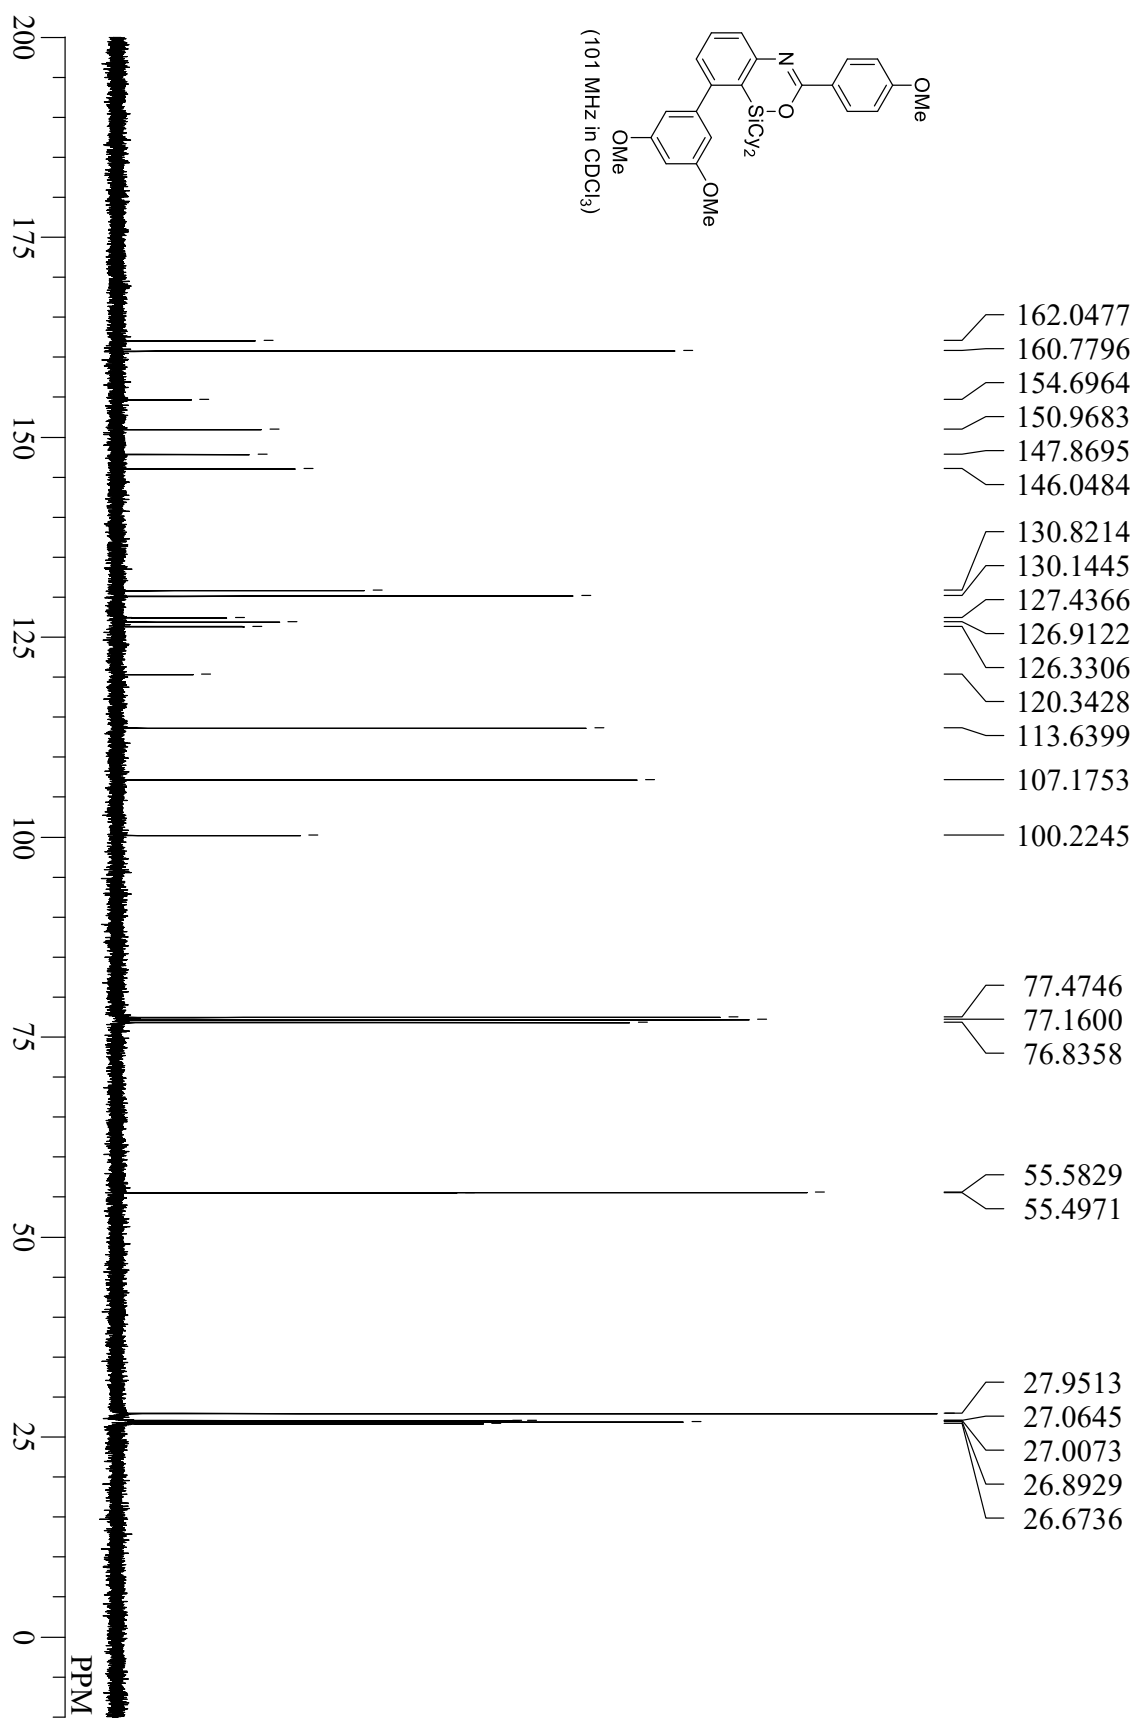

compound **3m**

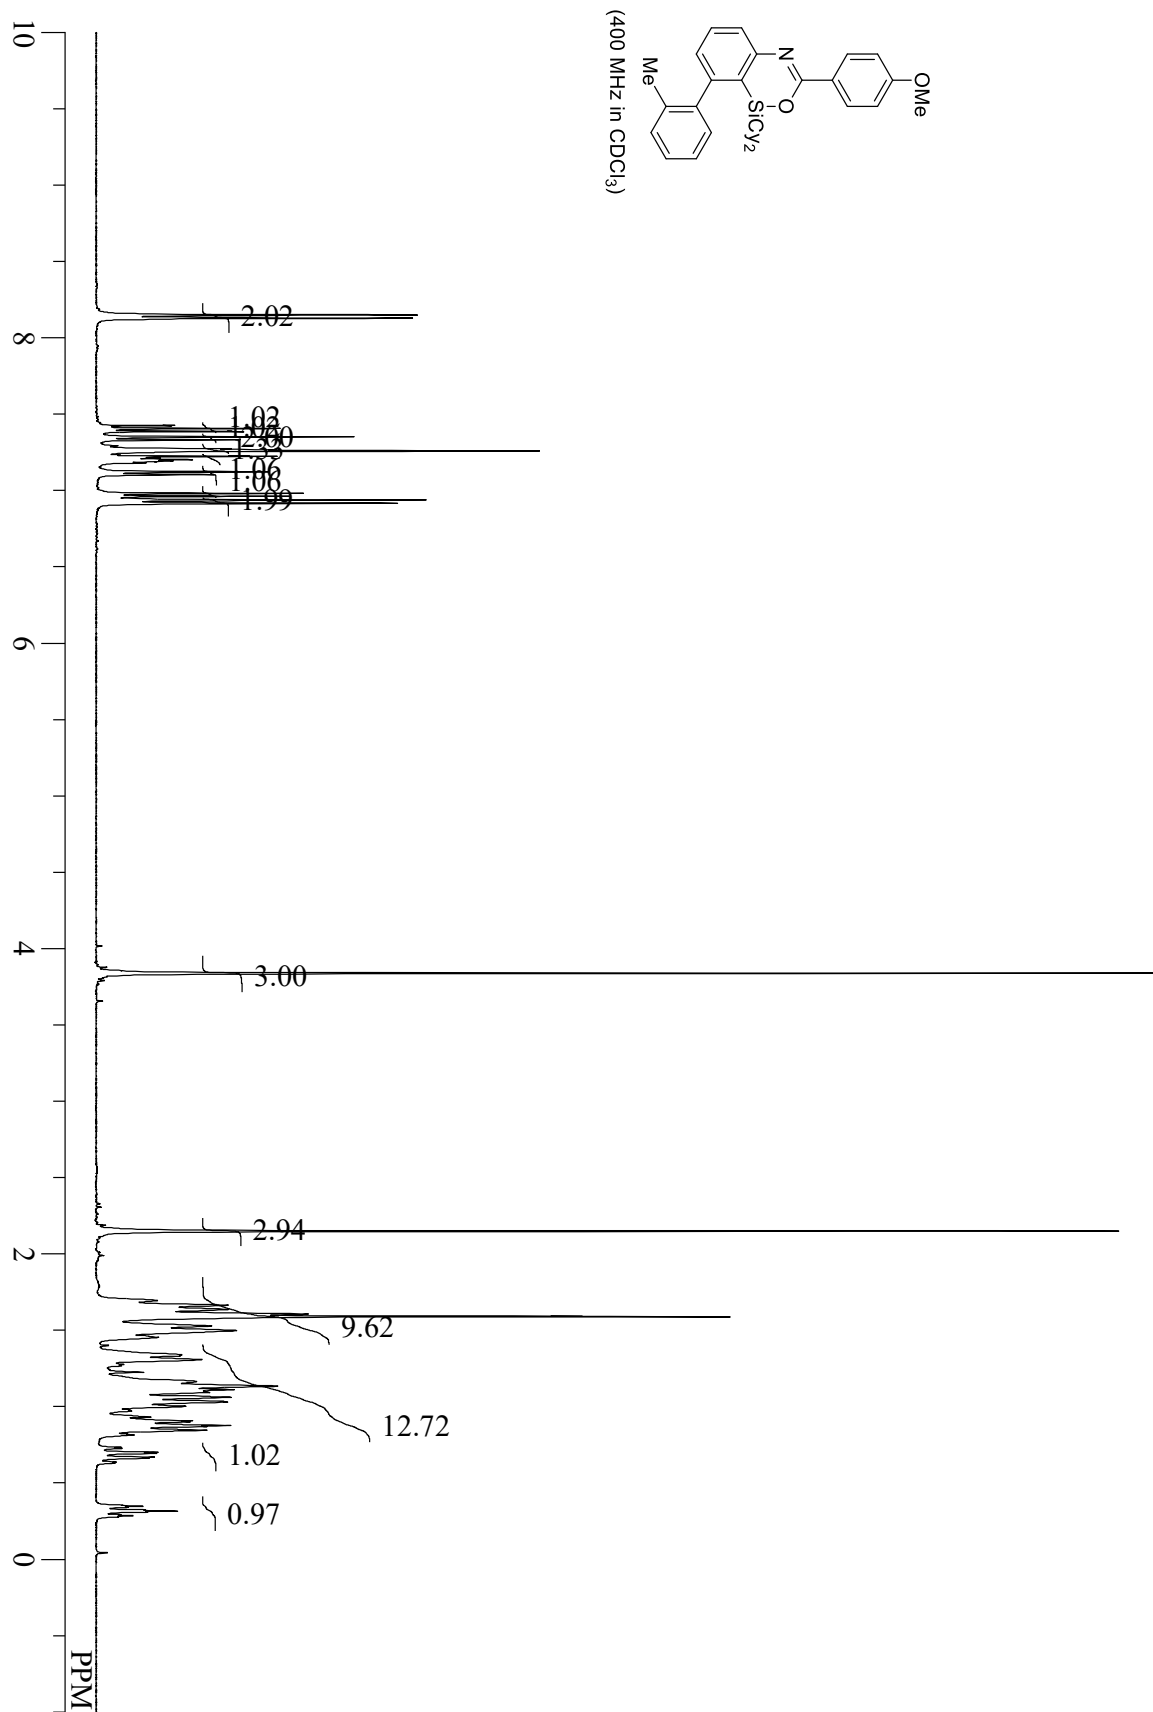

compound **3m**

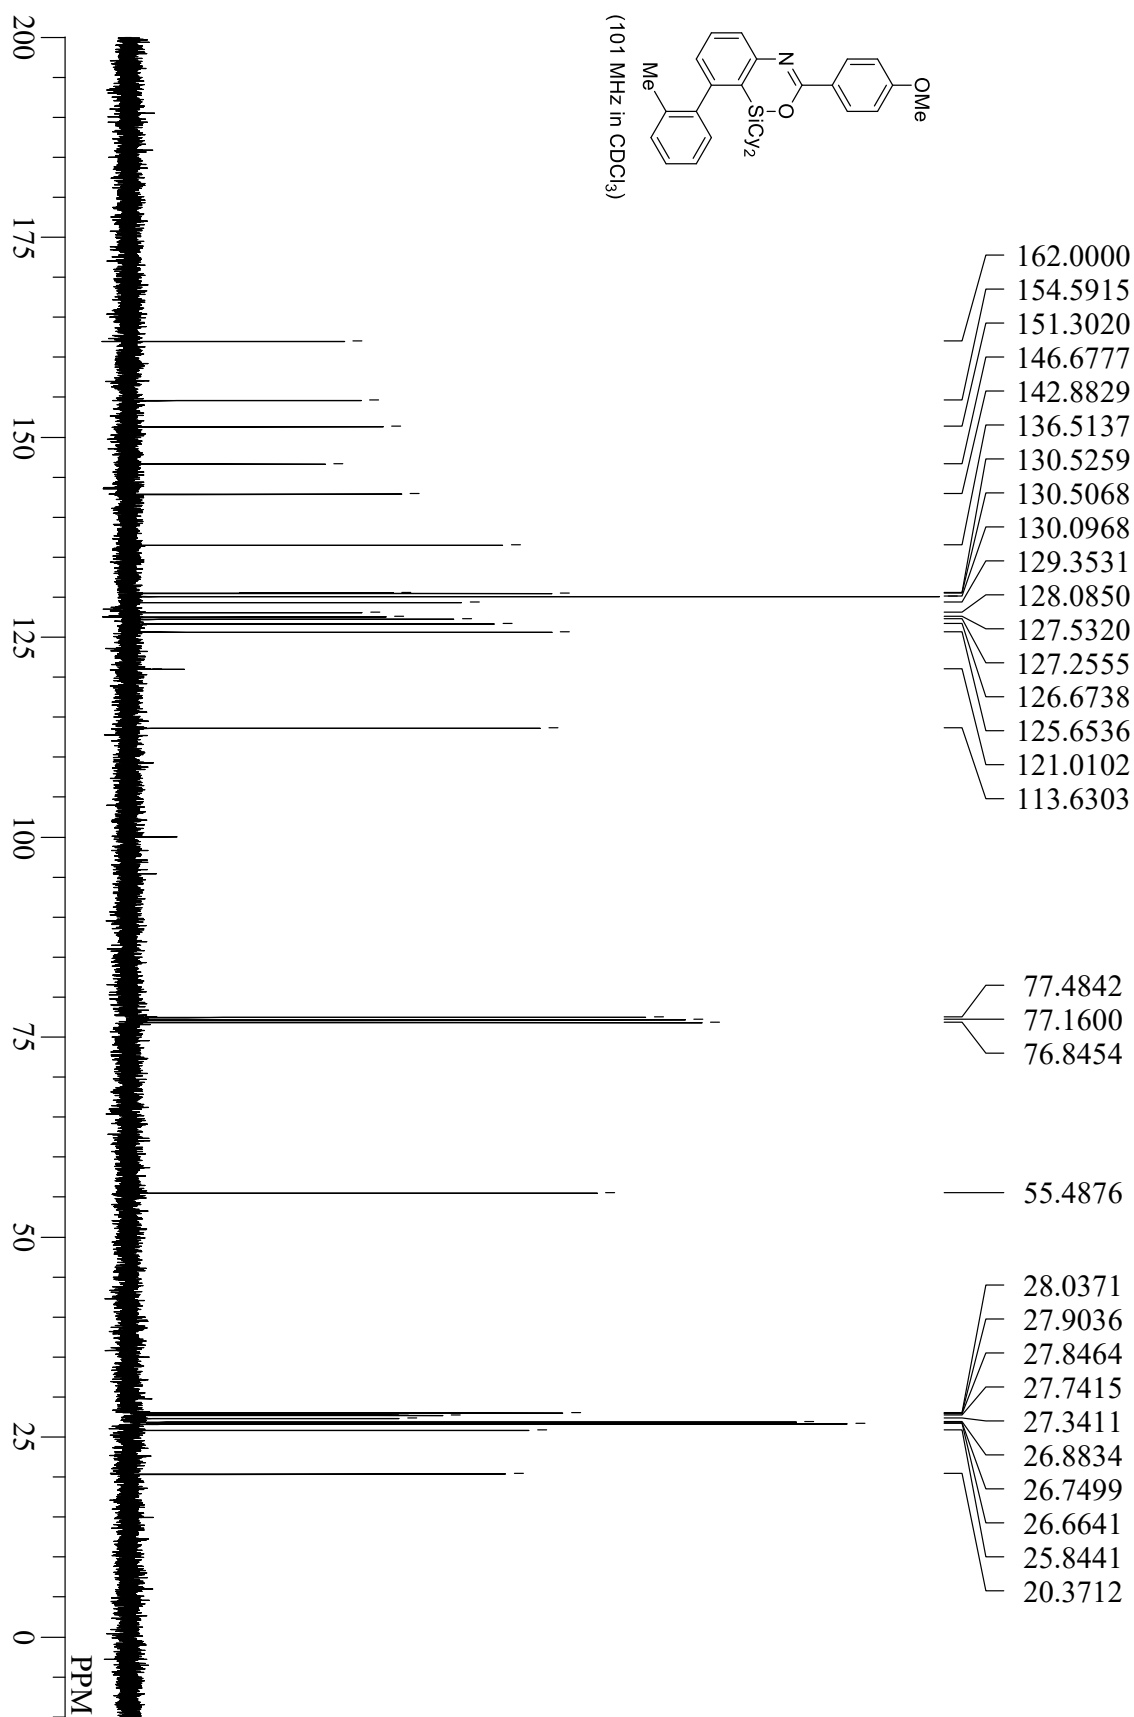



compound **3n**

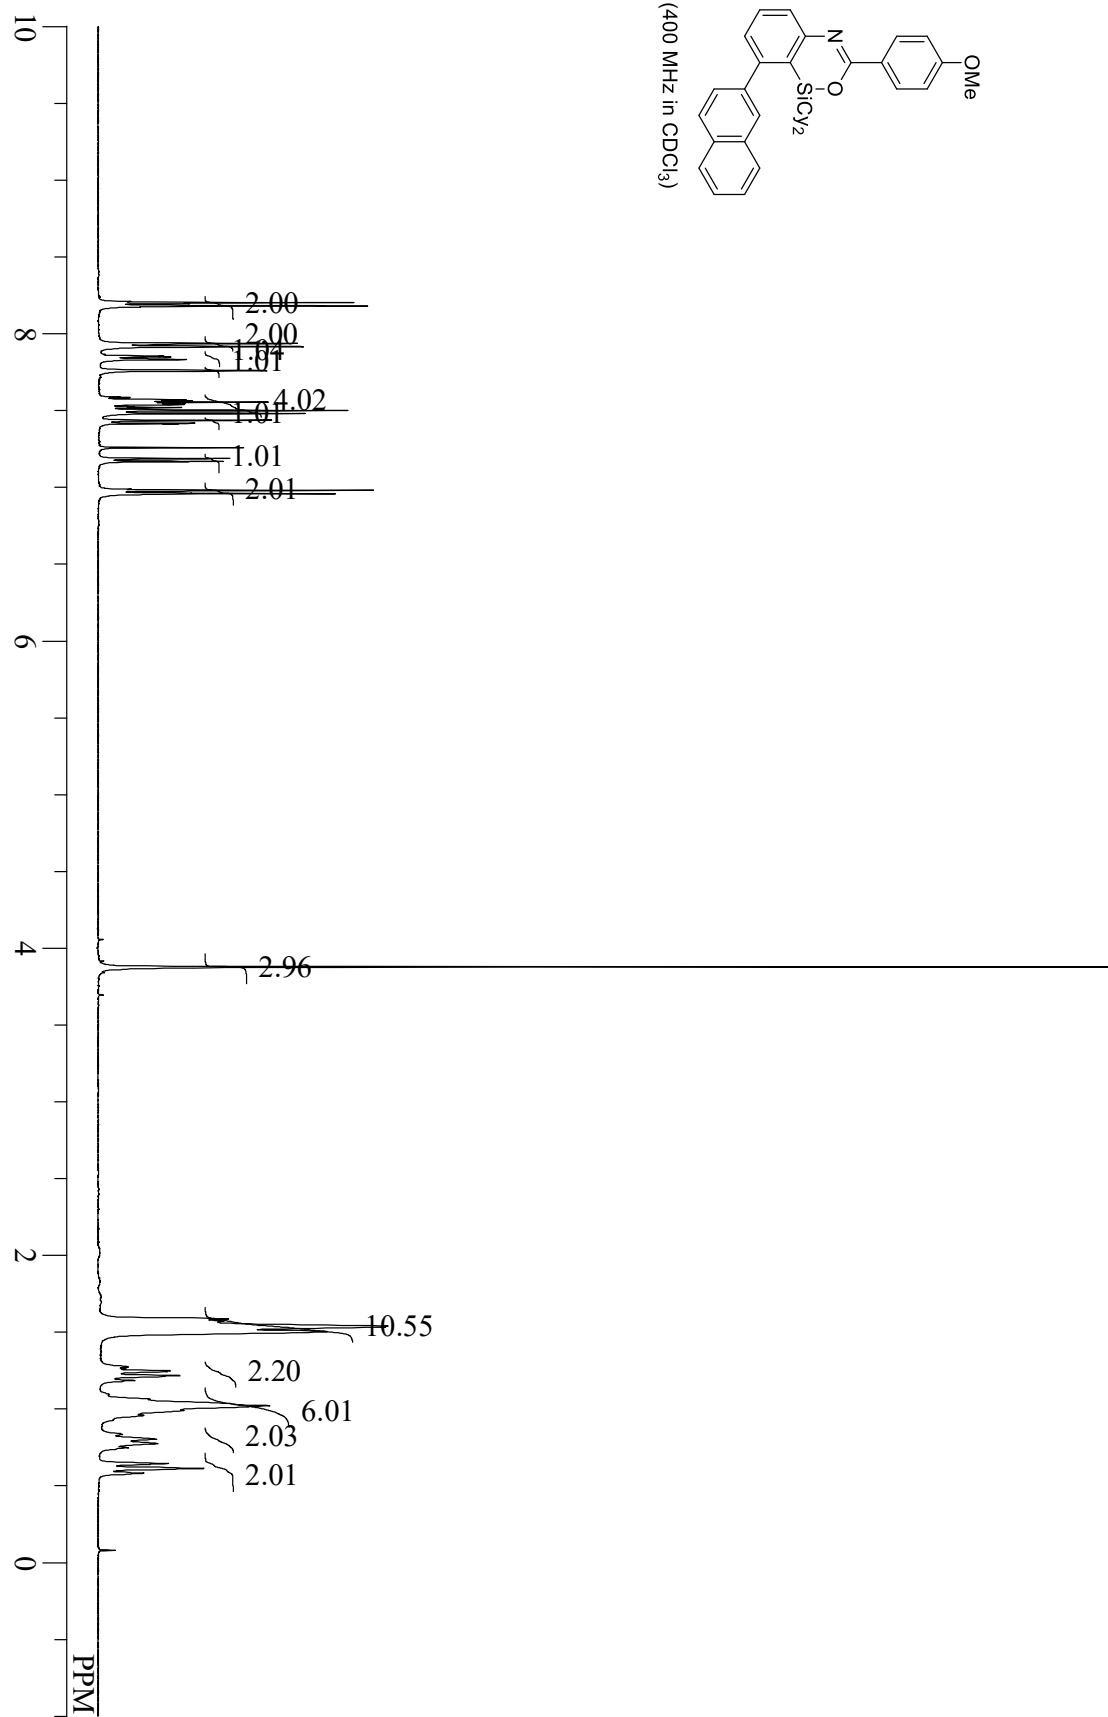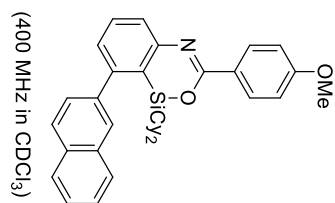

compound 3n

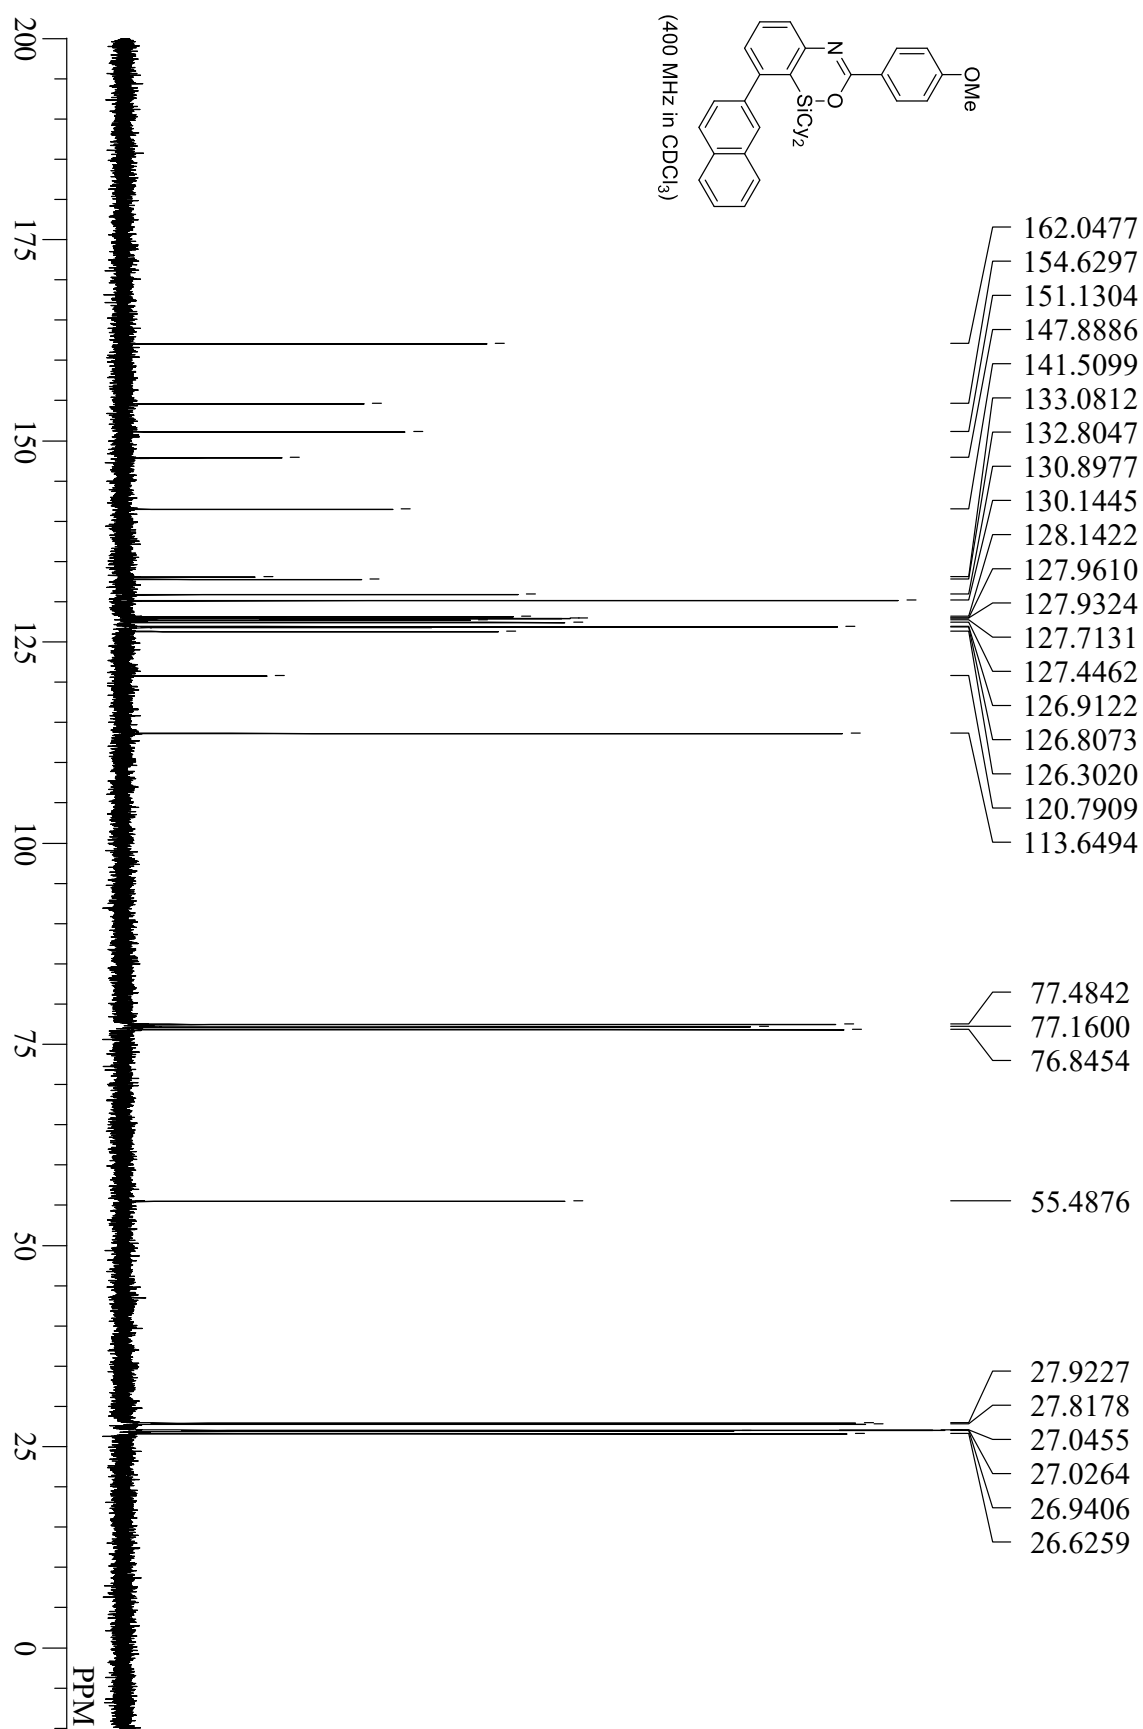

compound **30**

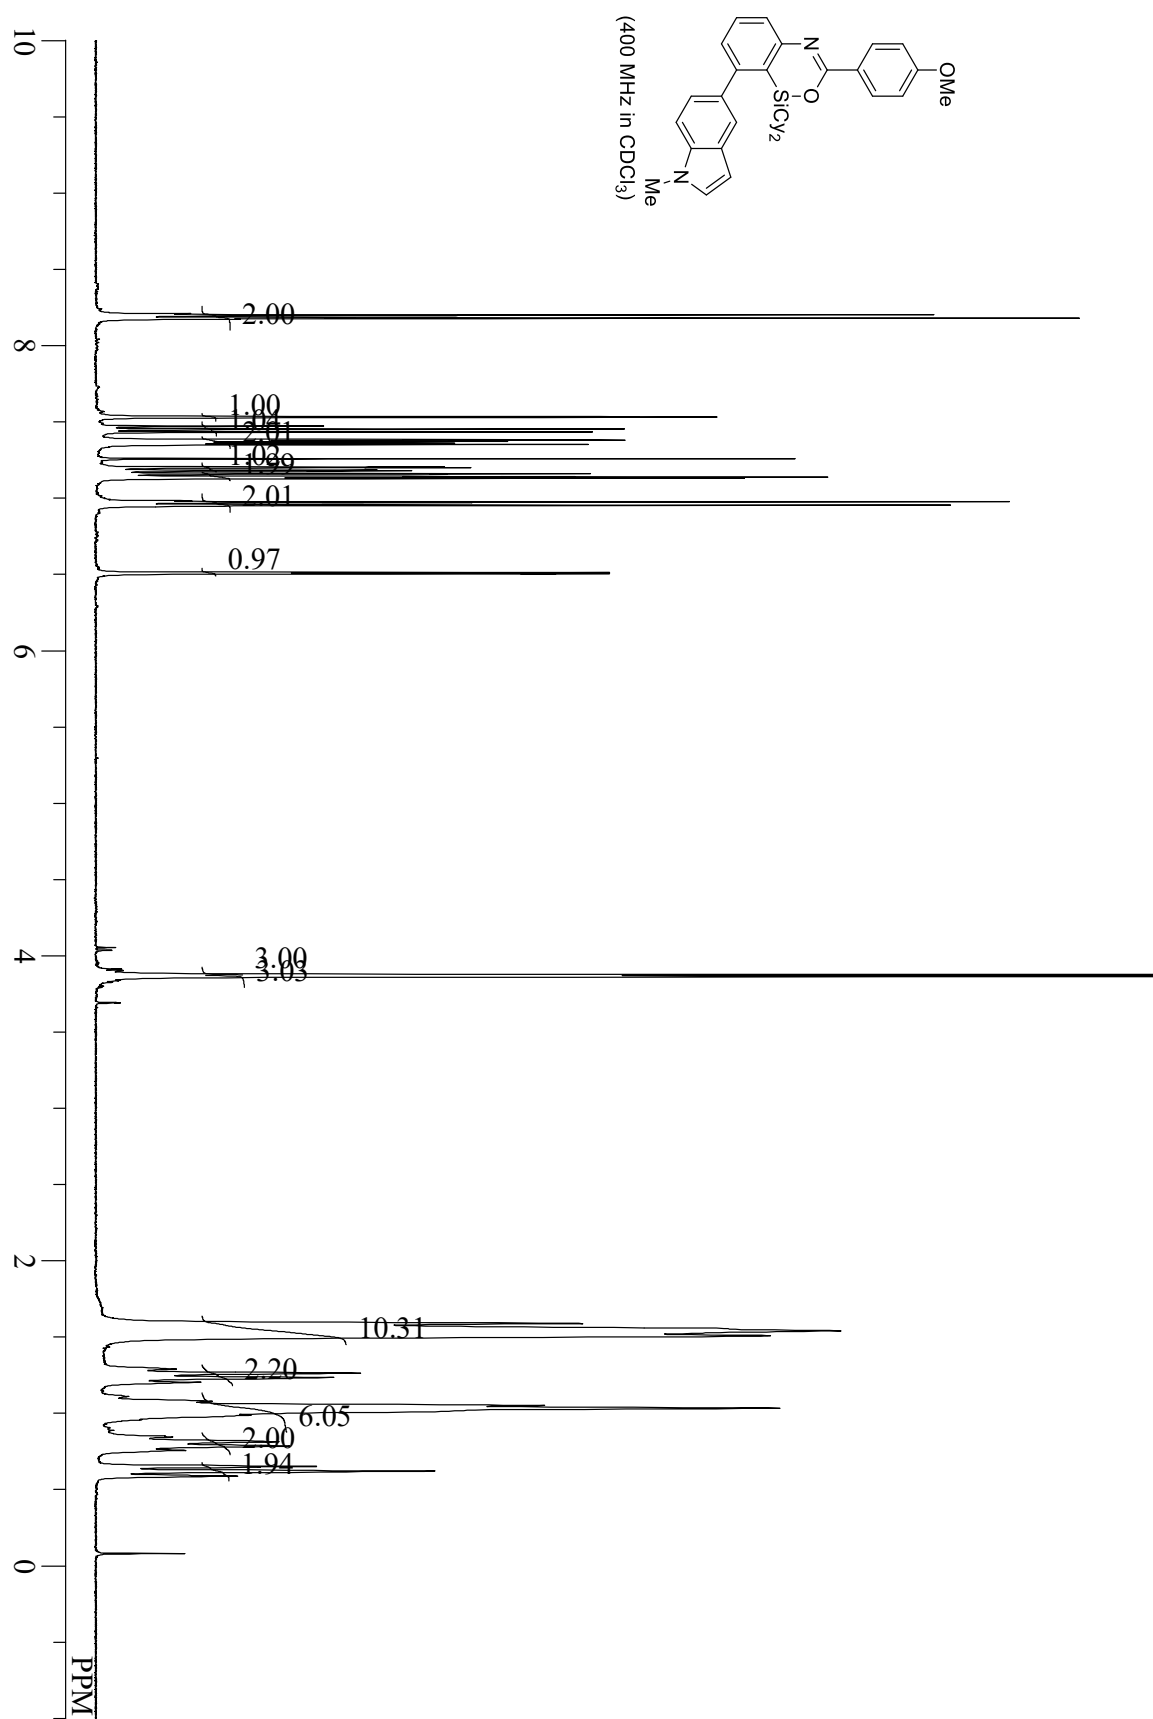

compound 30

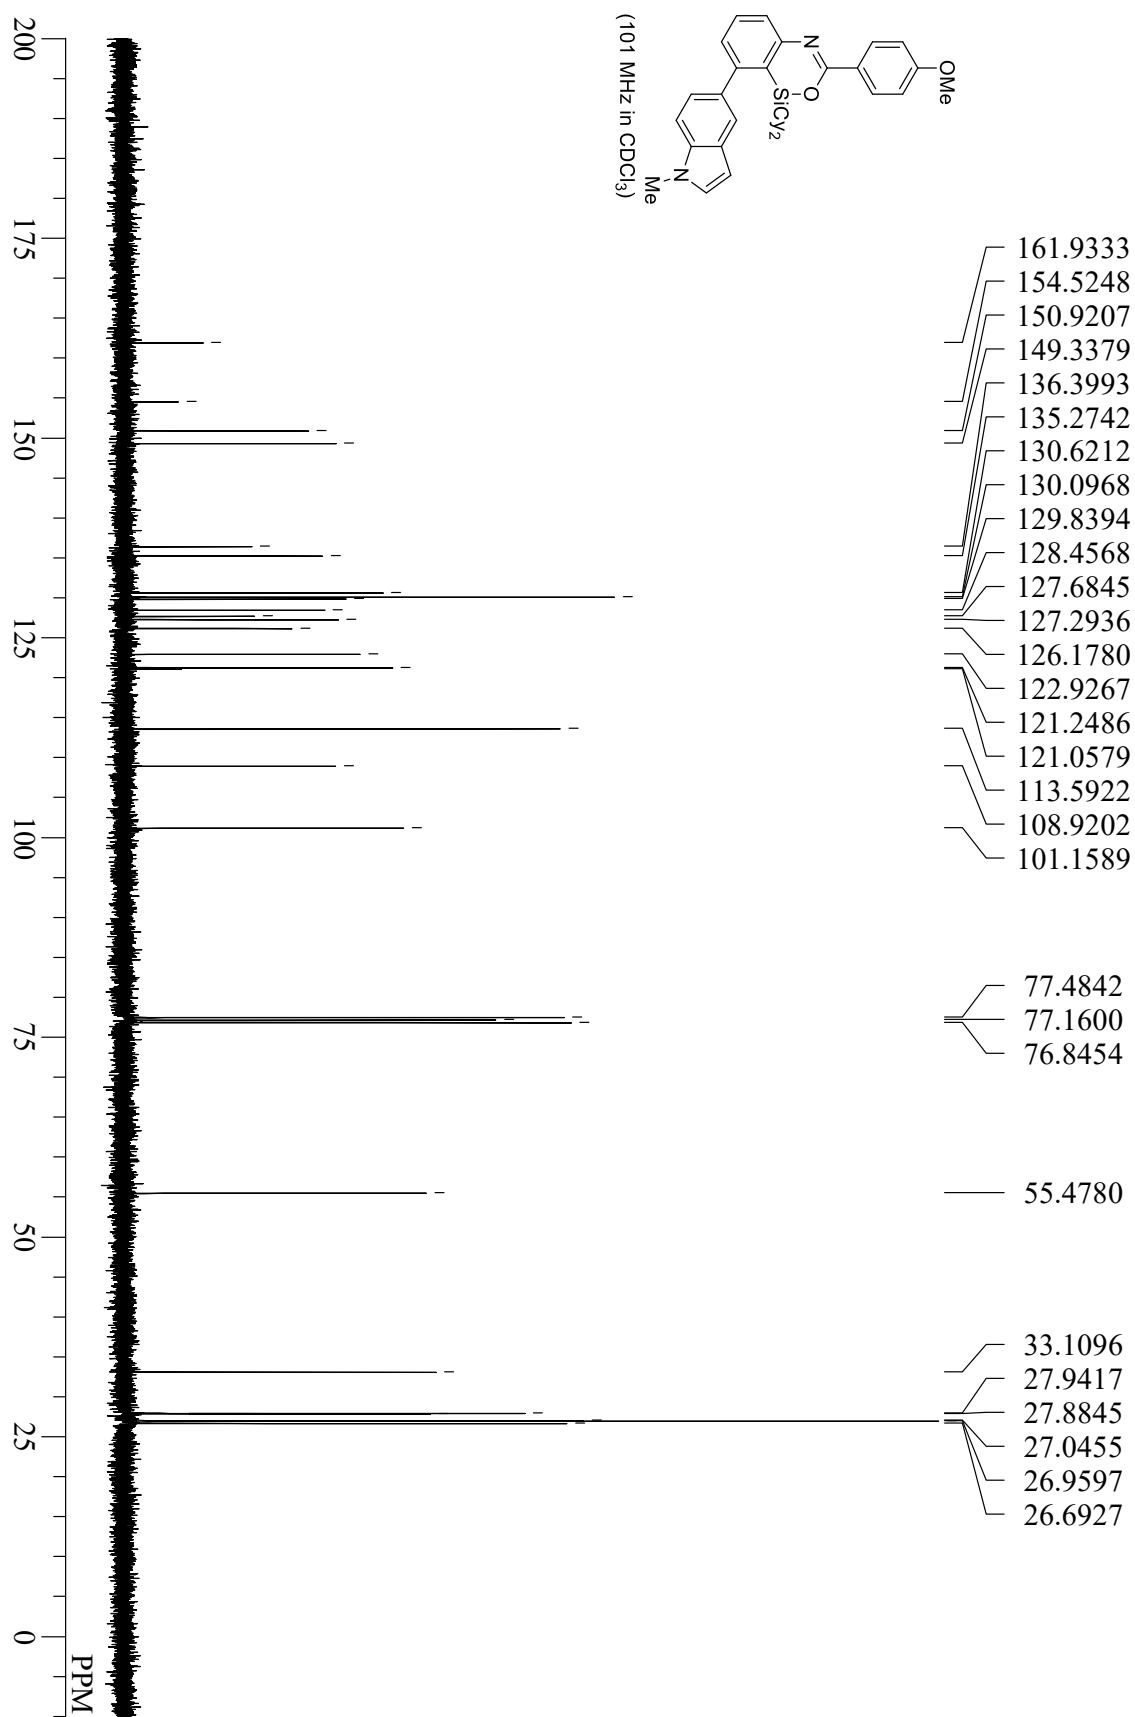

compound 3p

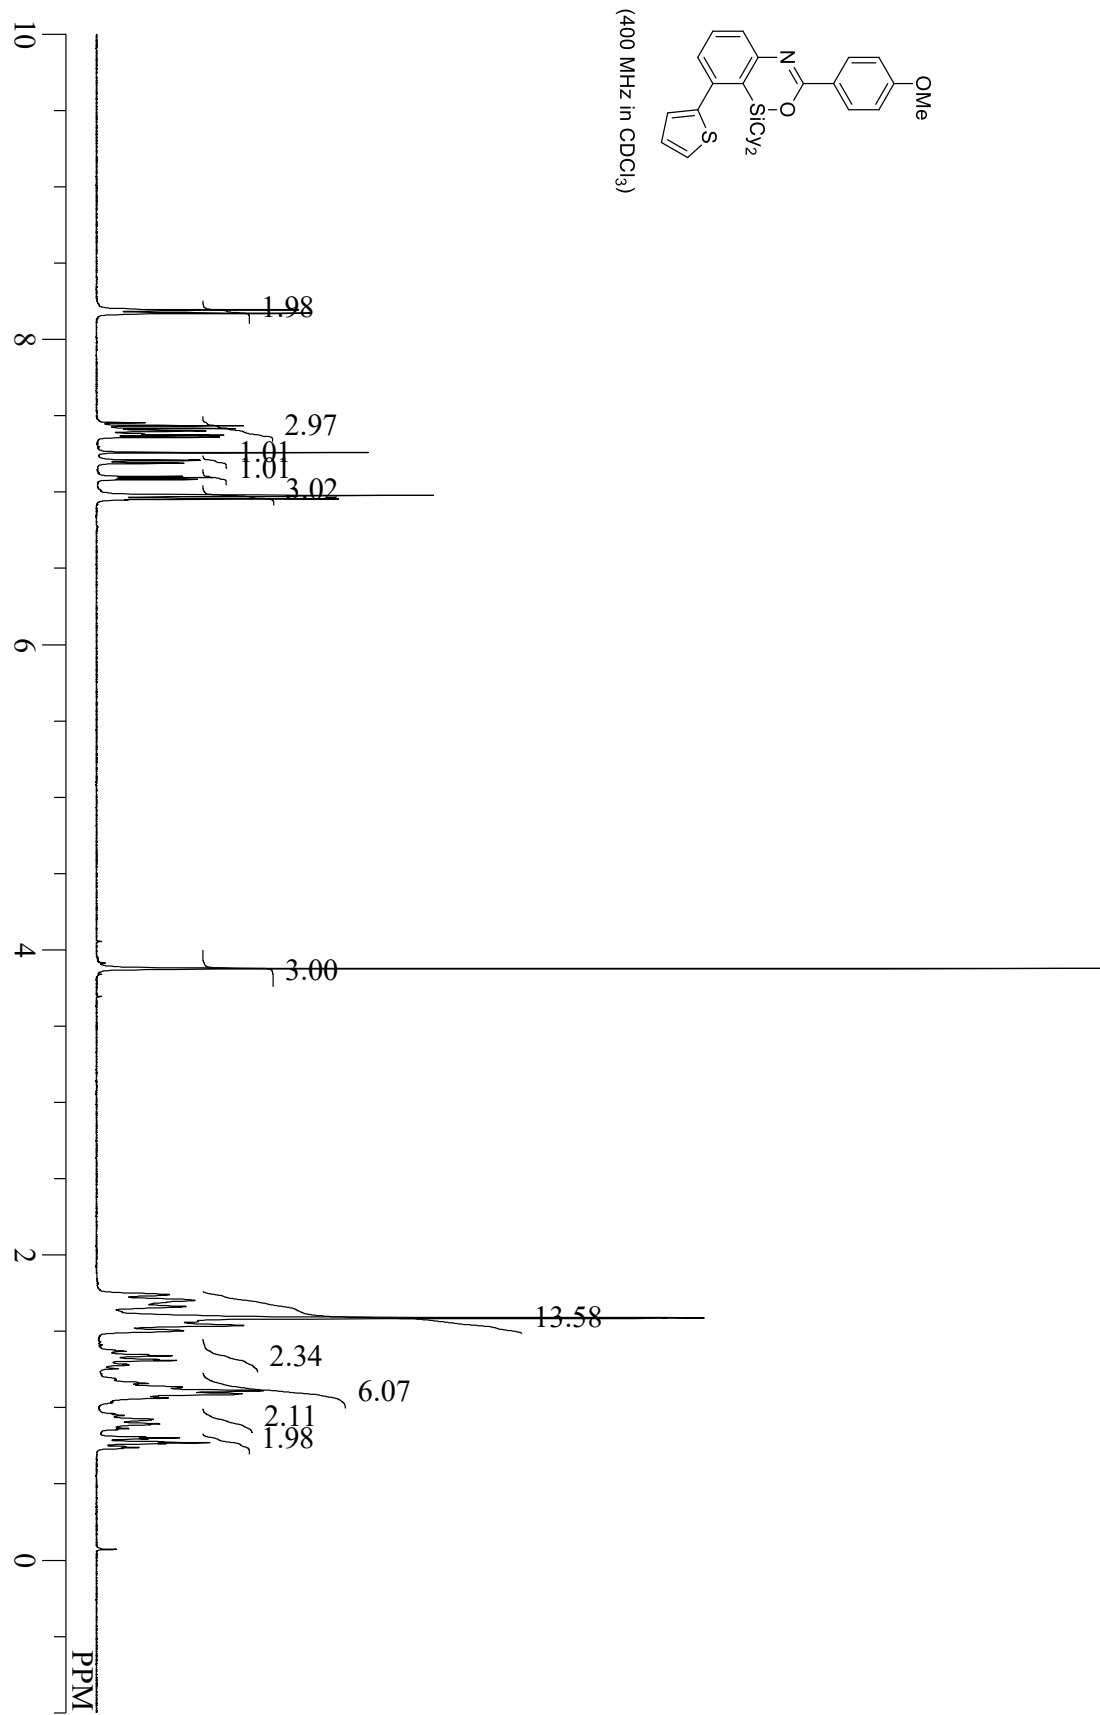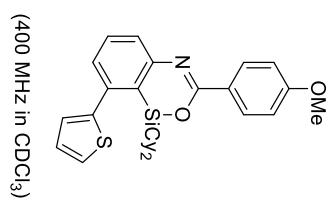

compound 3p

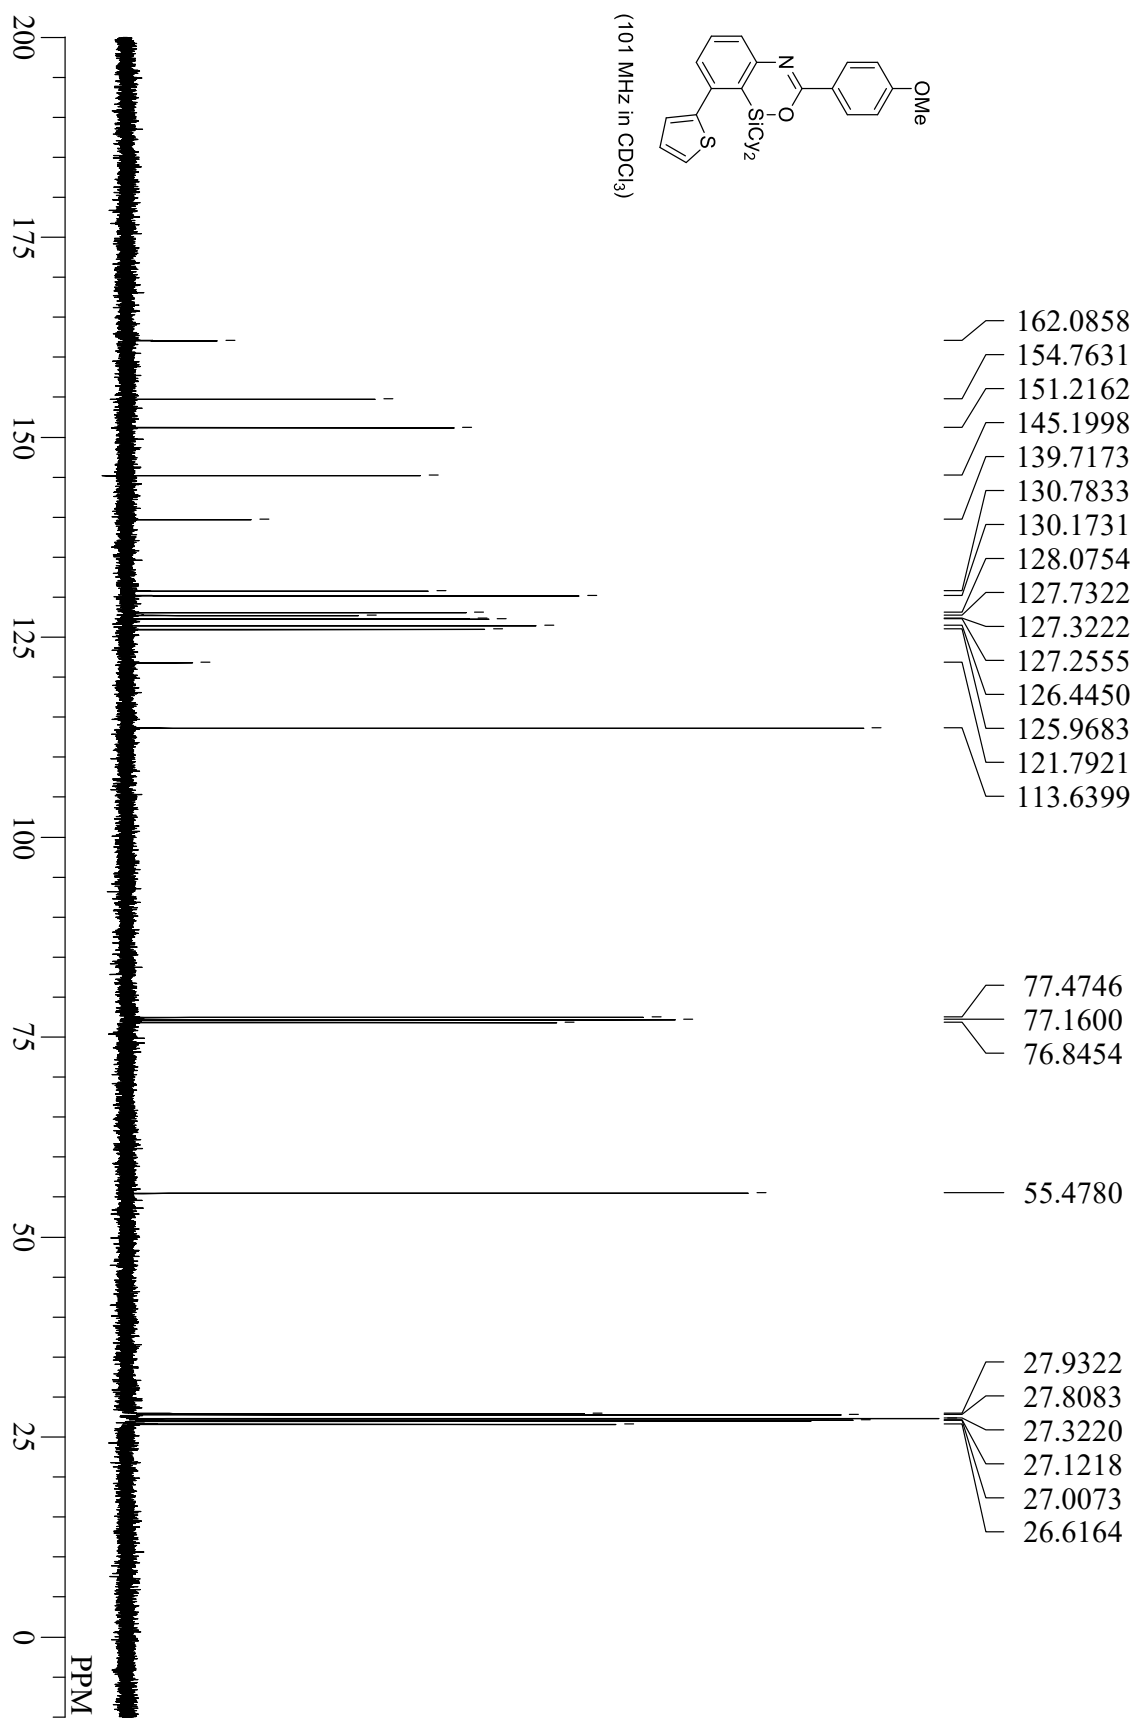

compound **3q**

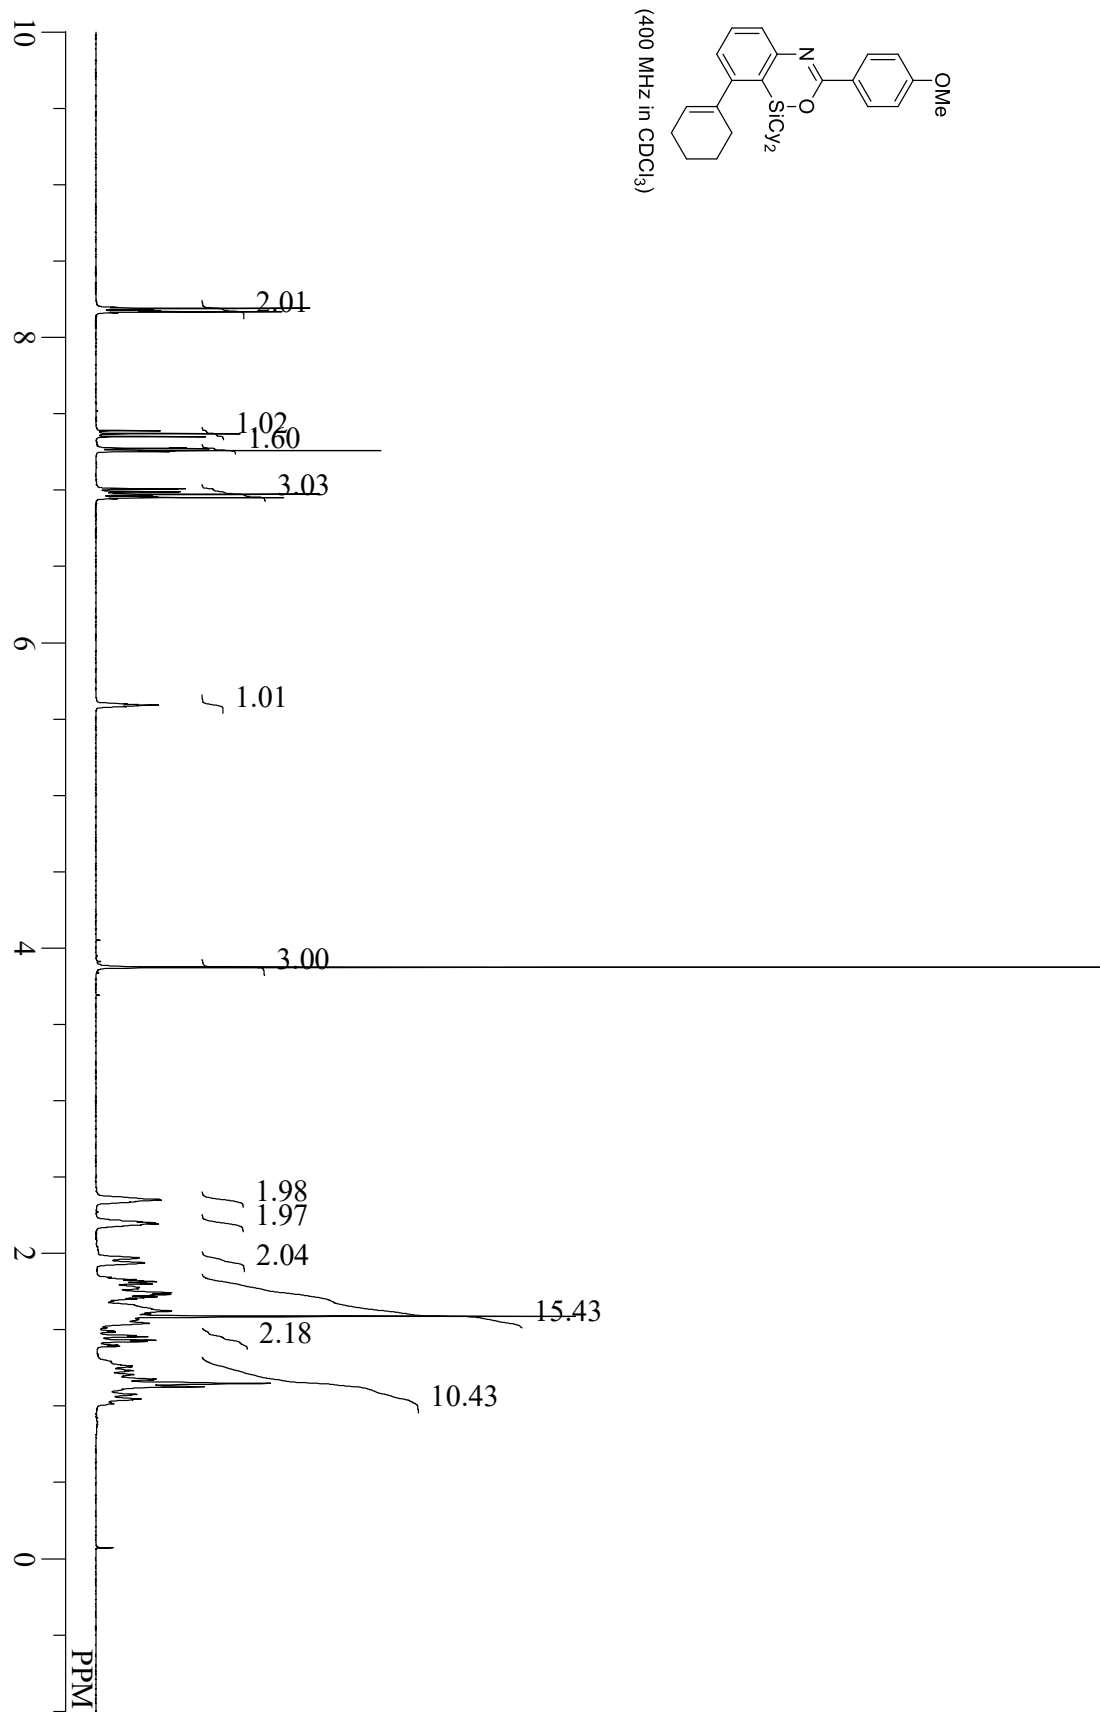

compound 3q

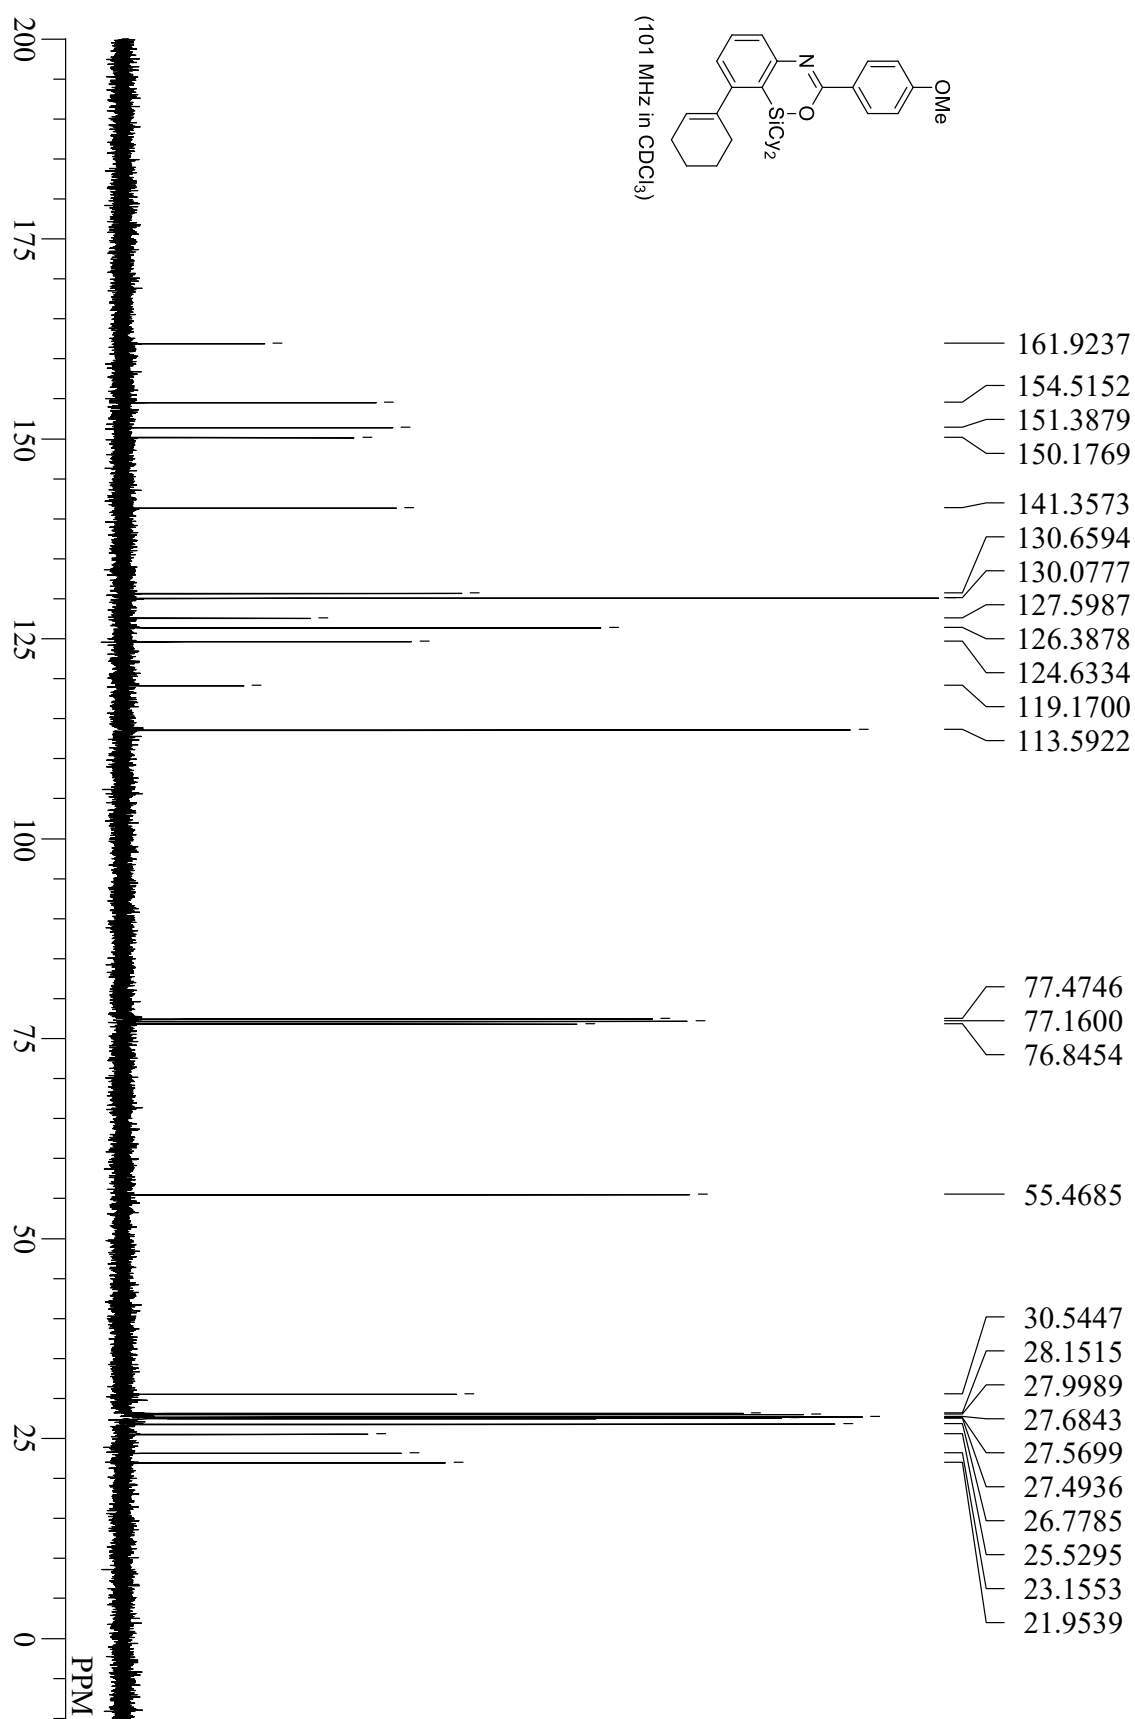



compound **3r**

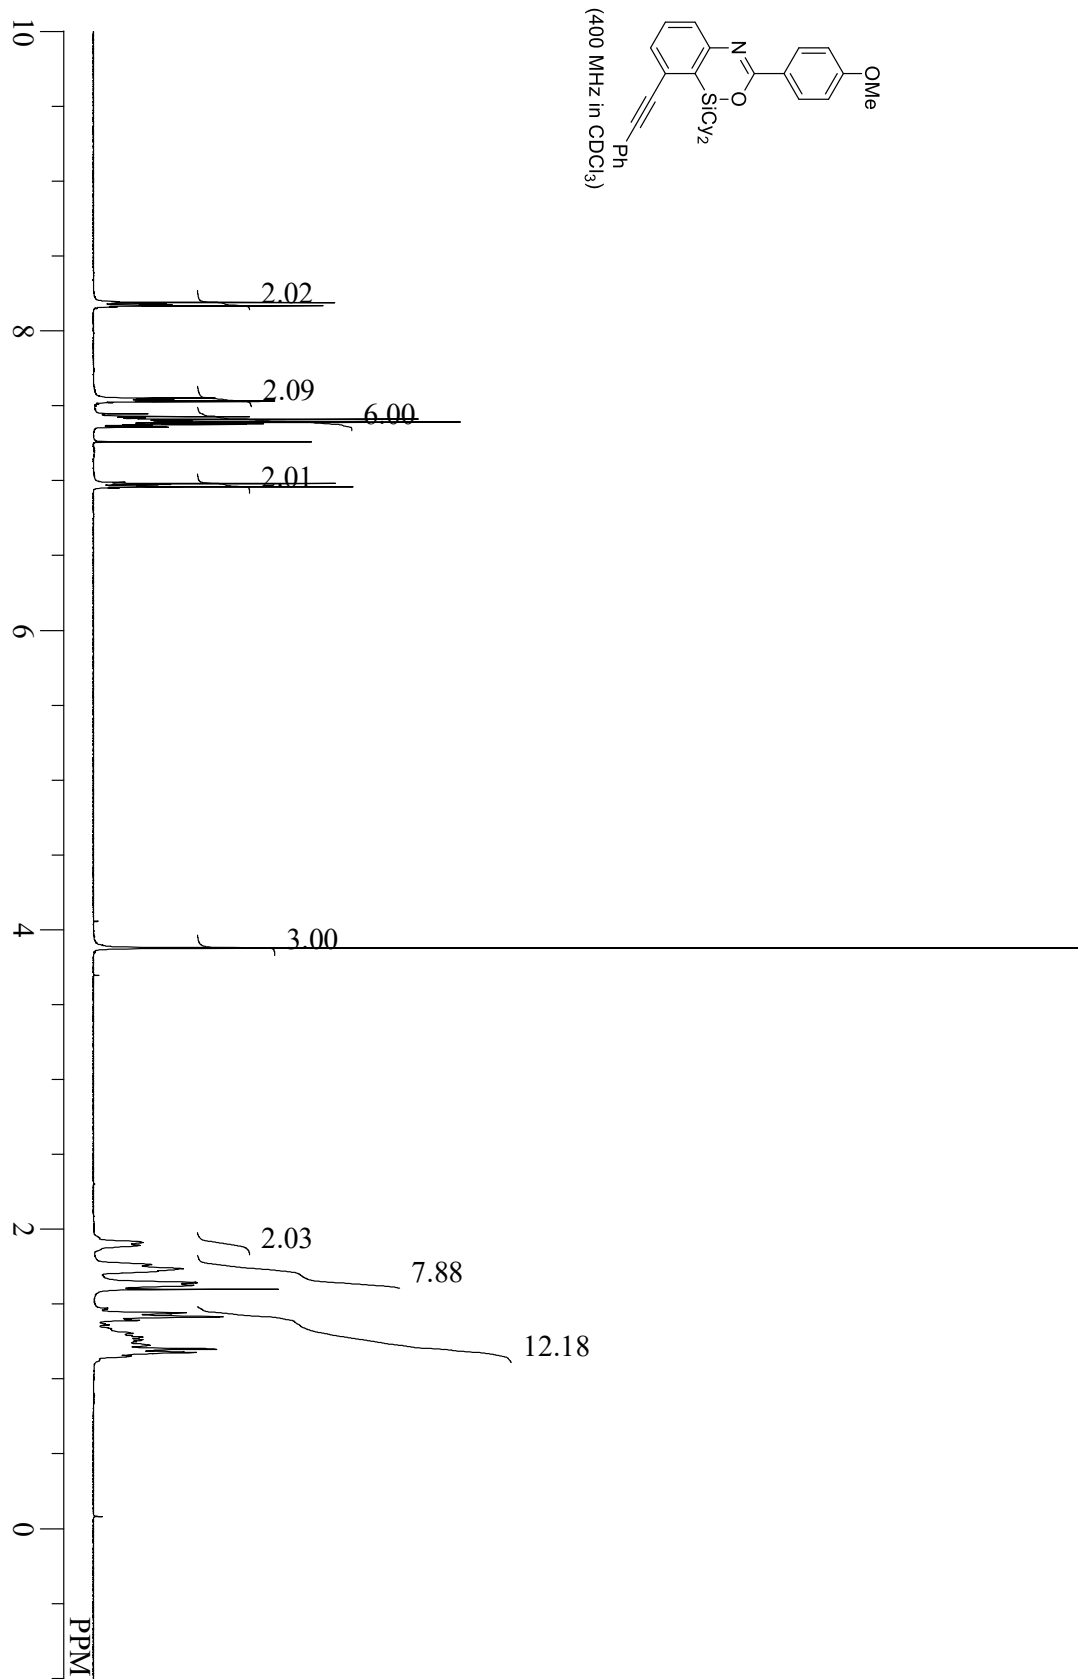

compound 3r

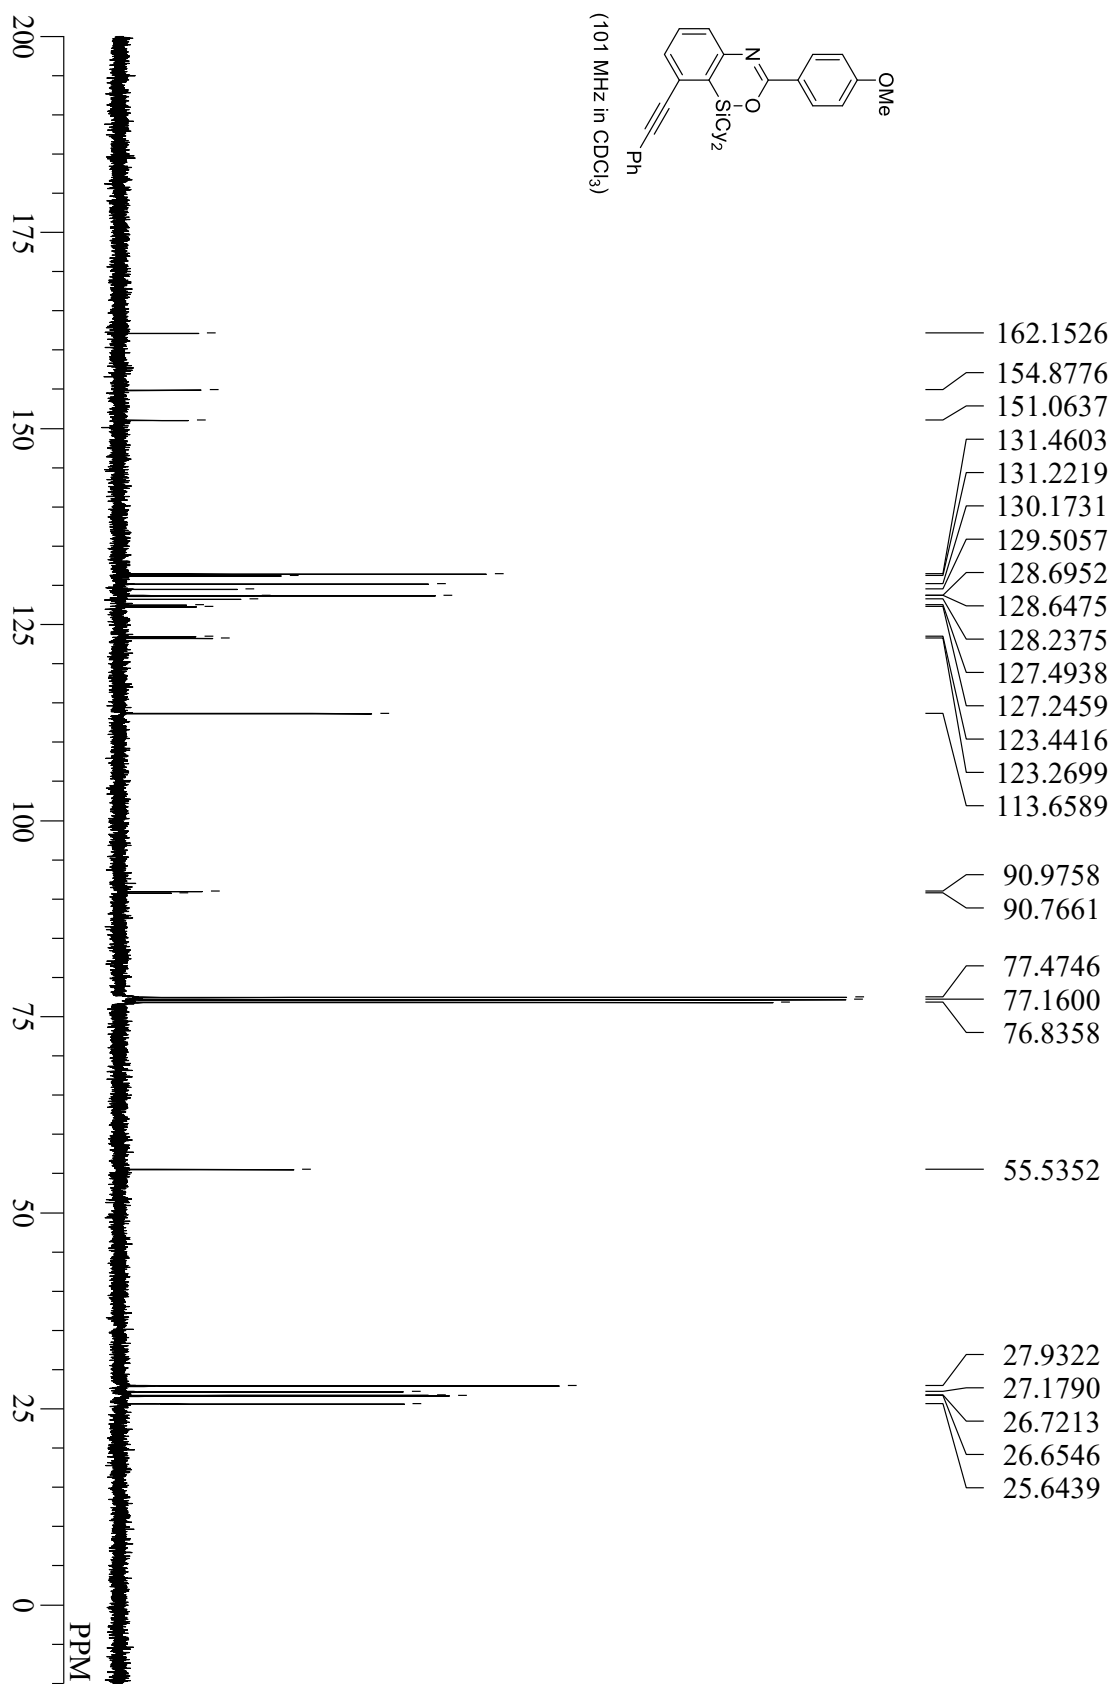

compound 3s

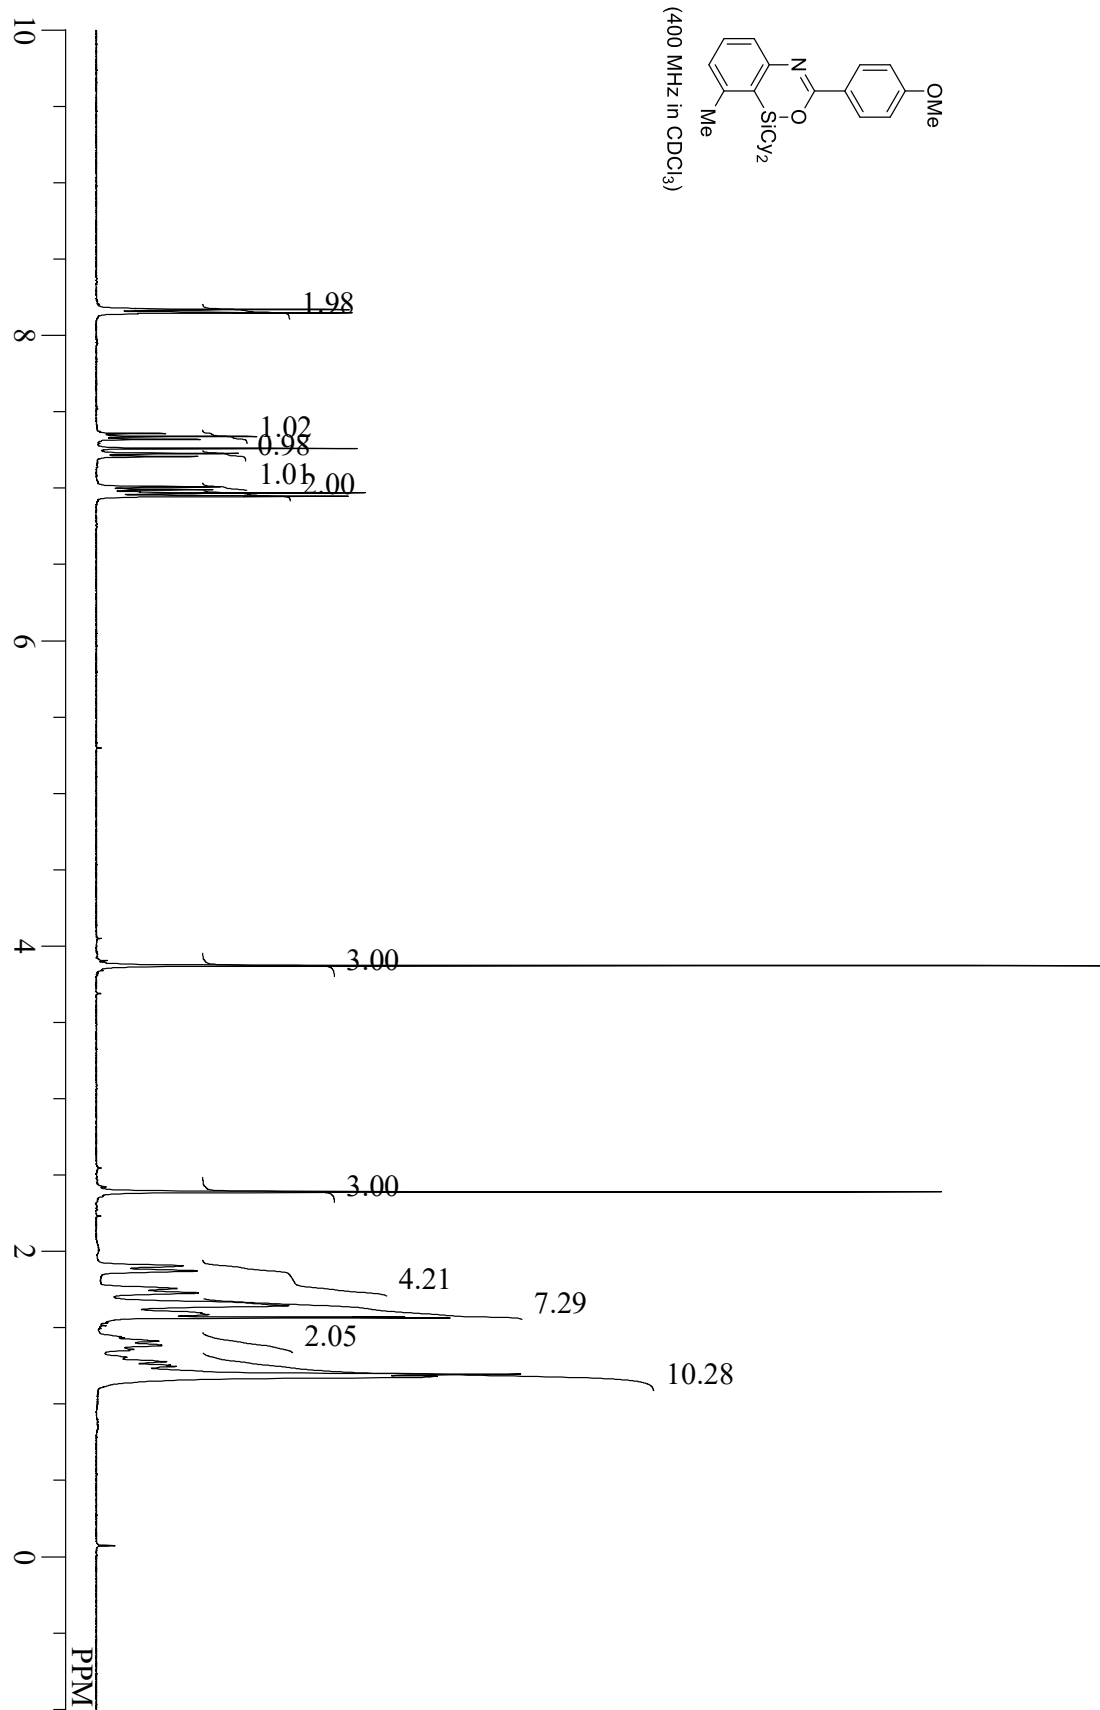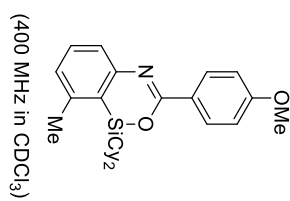

compound 3s

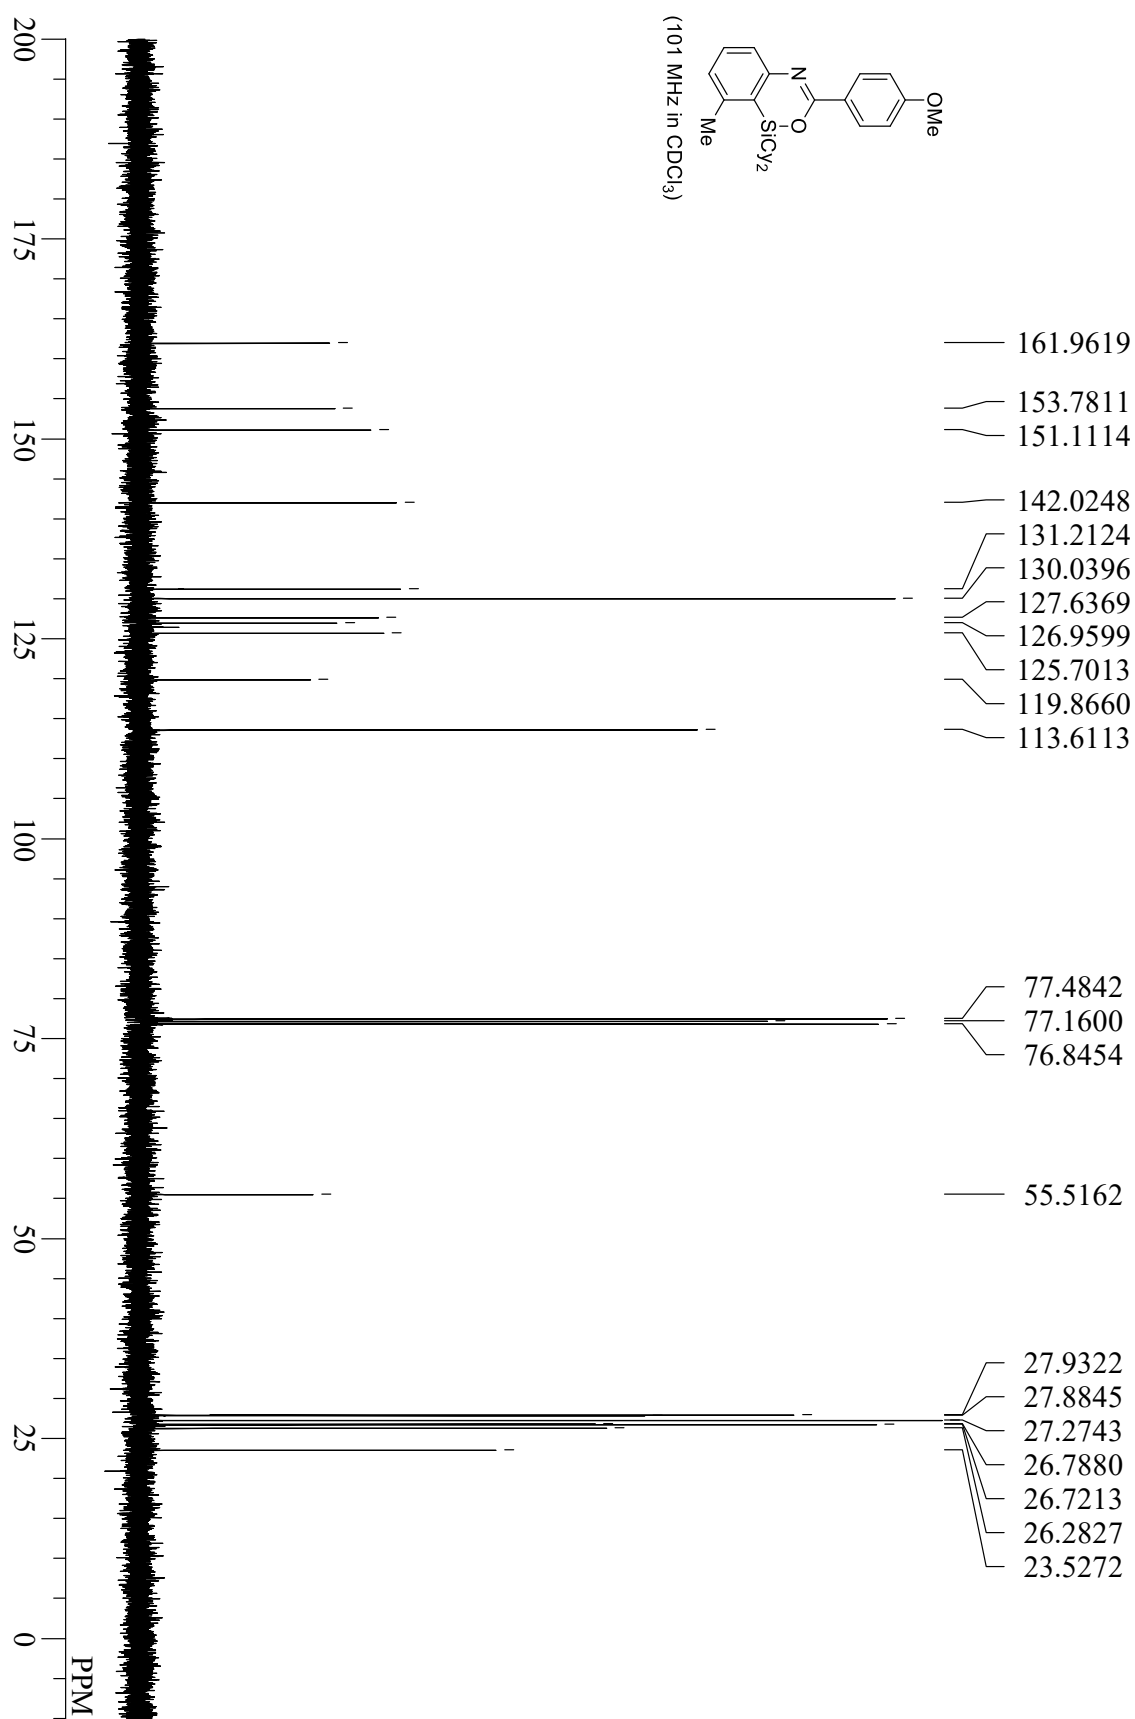

compound **3t**

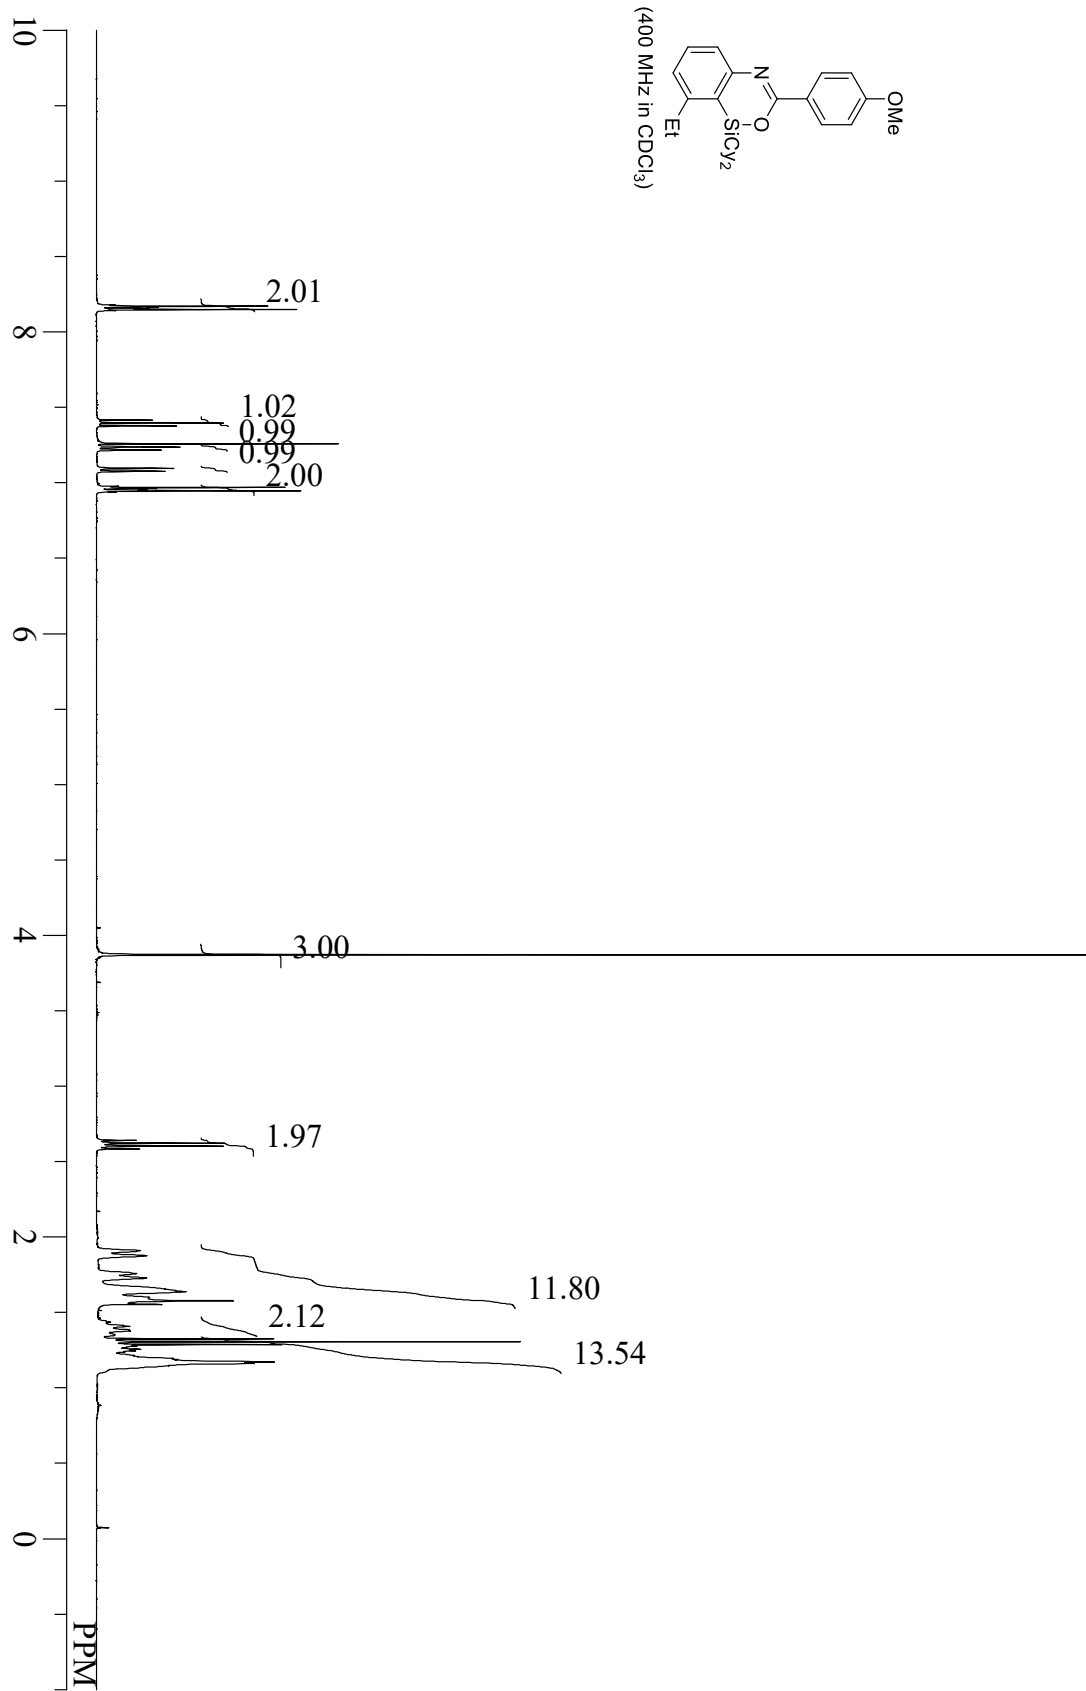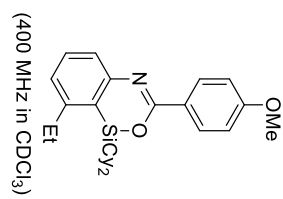

compound 3t

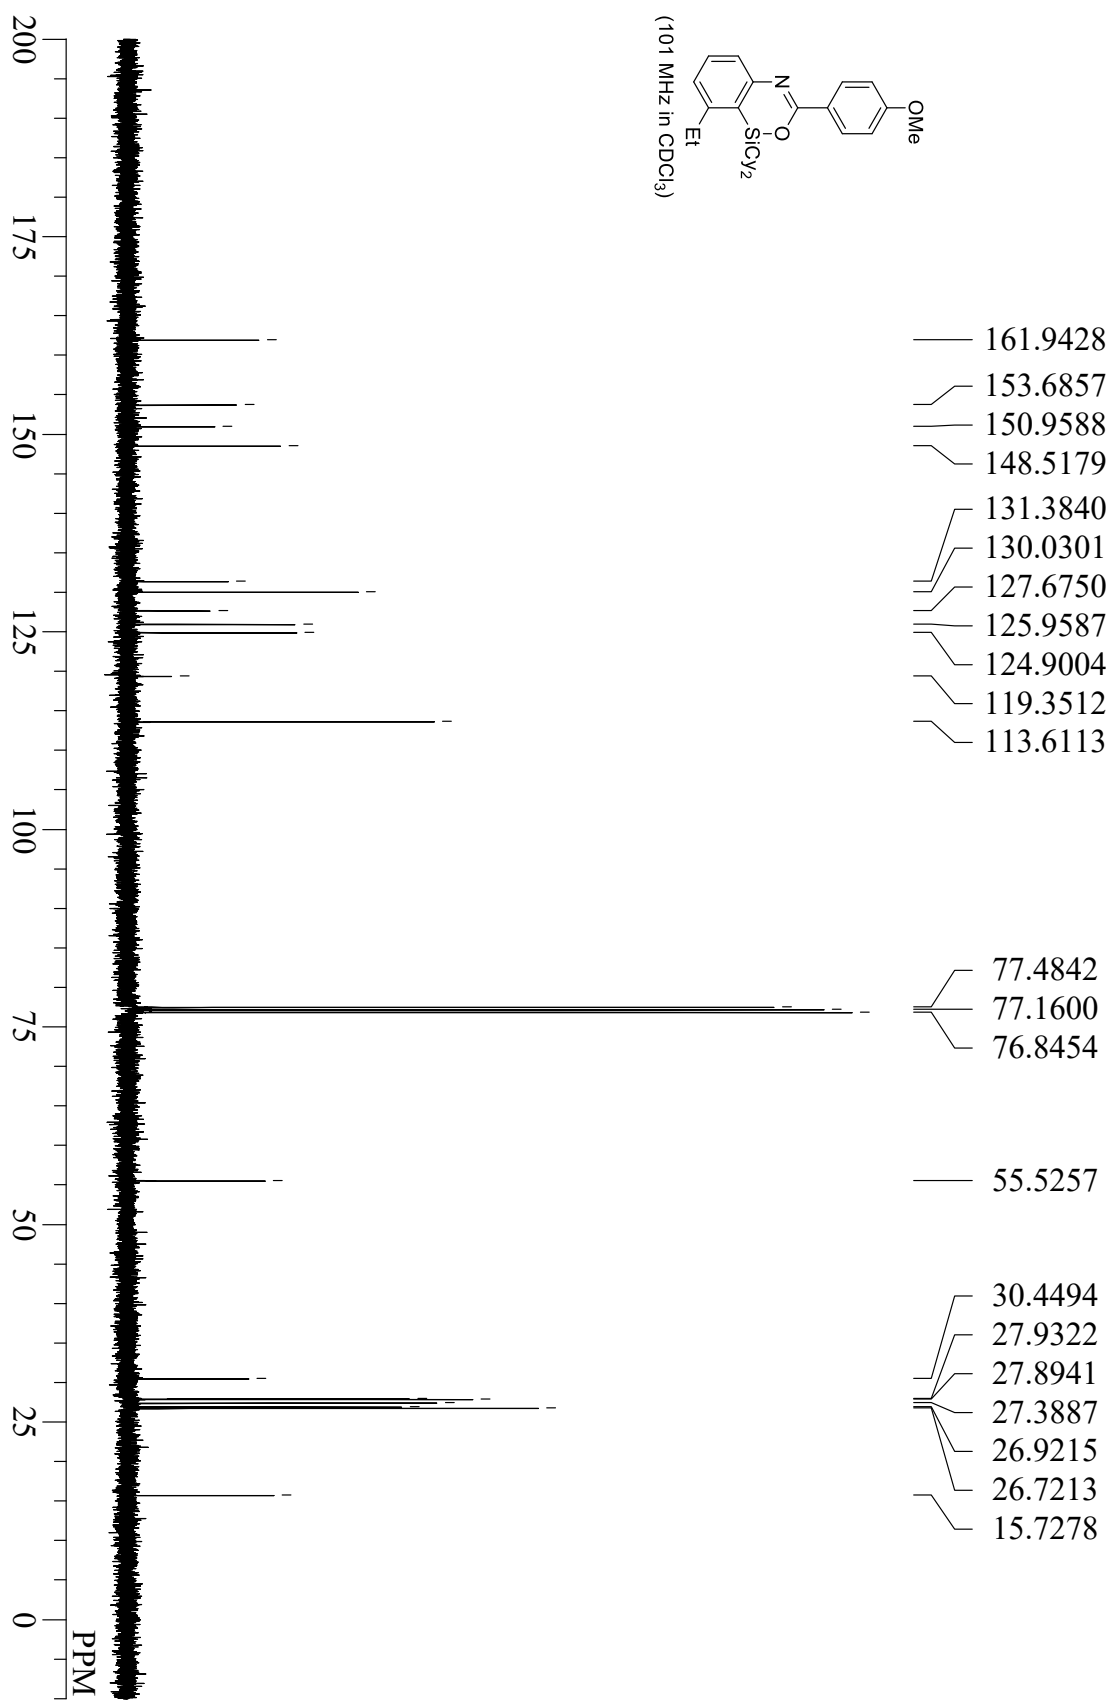

compound **3u**

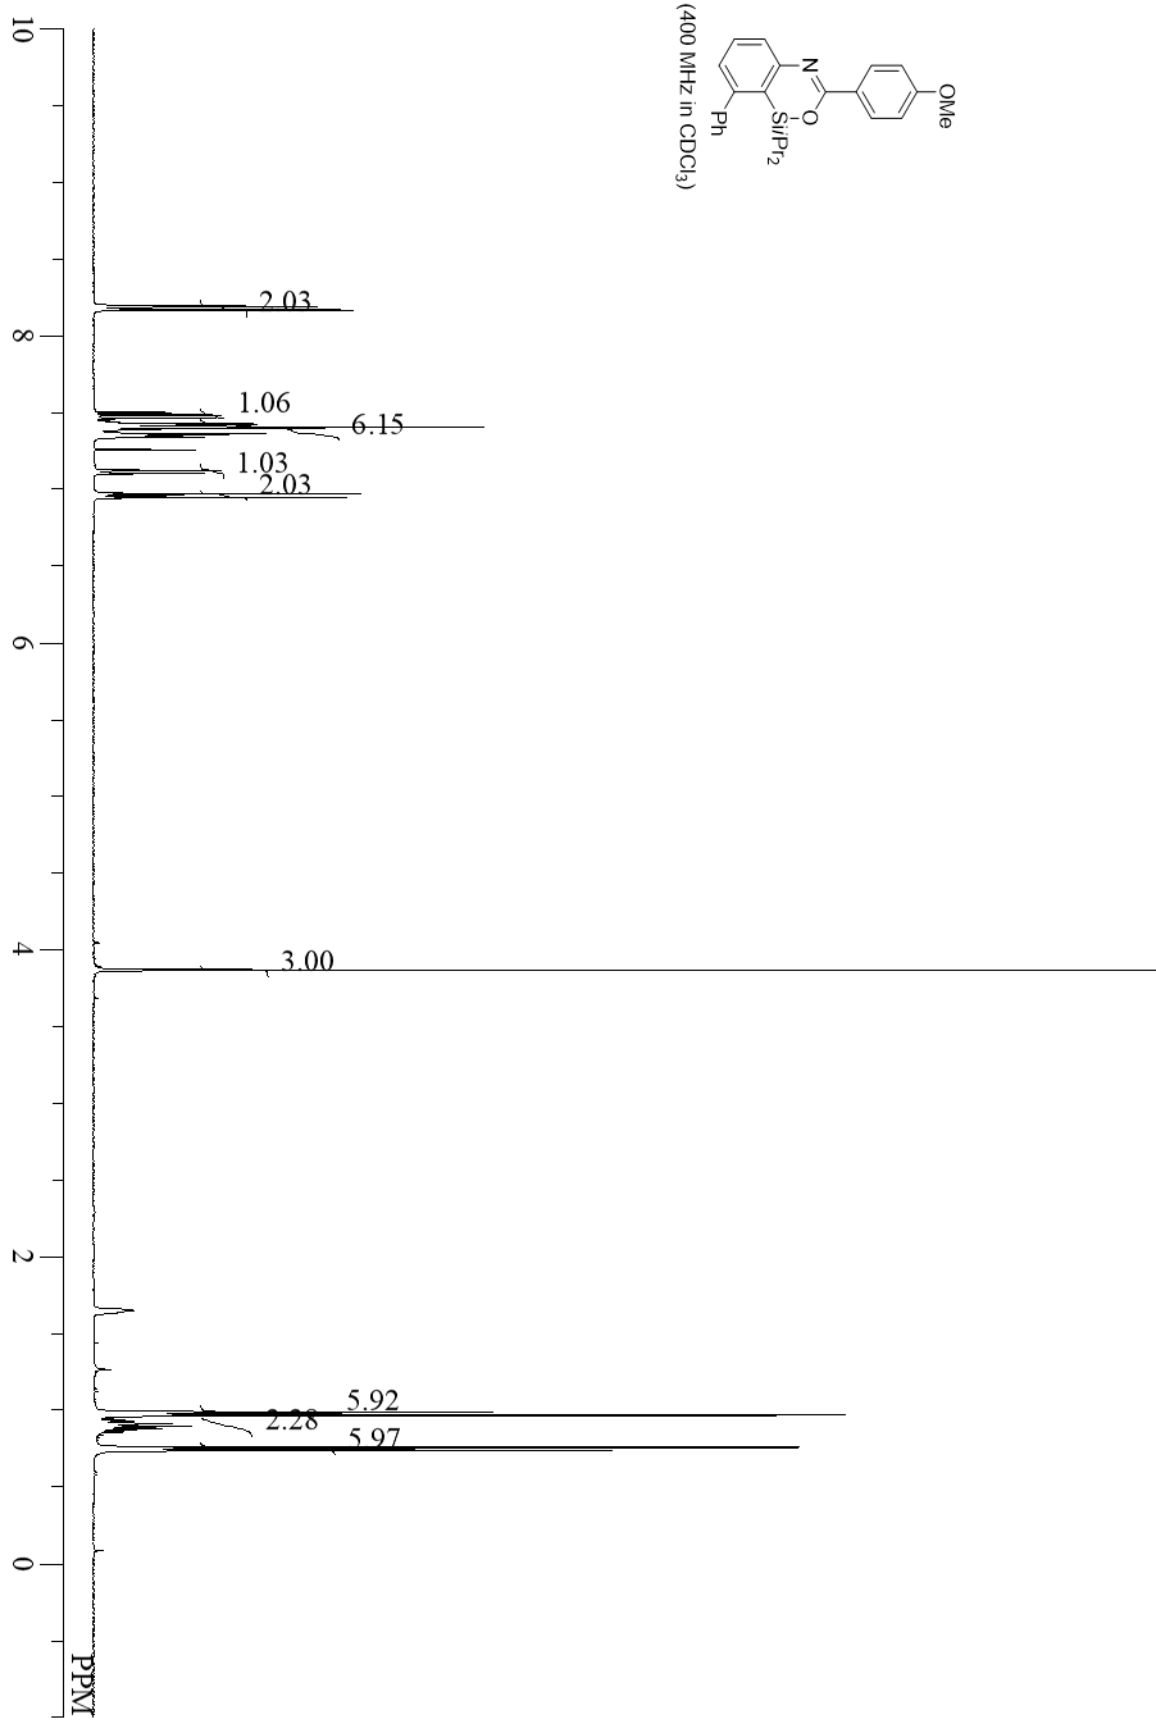

compound **3u**

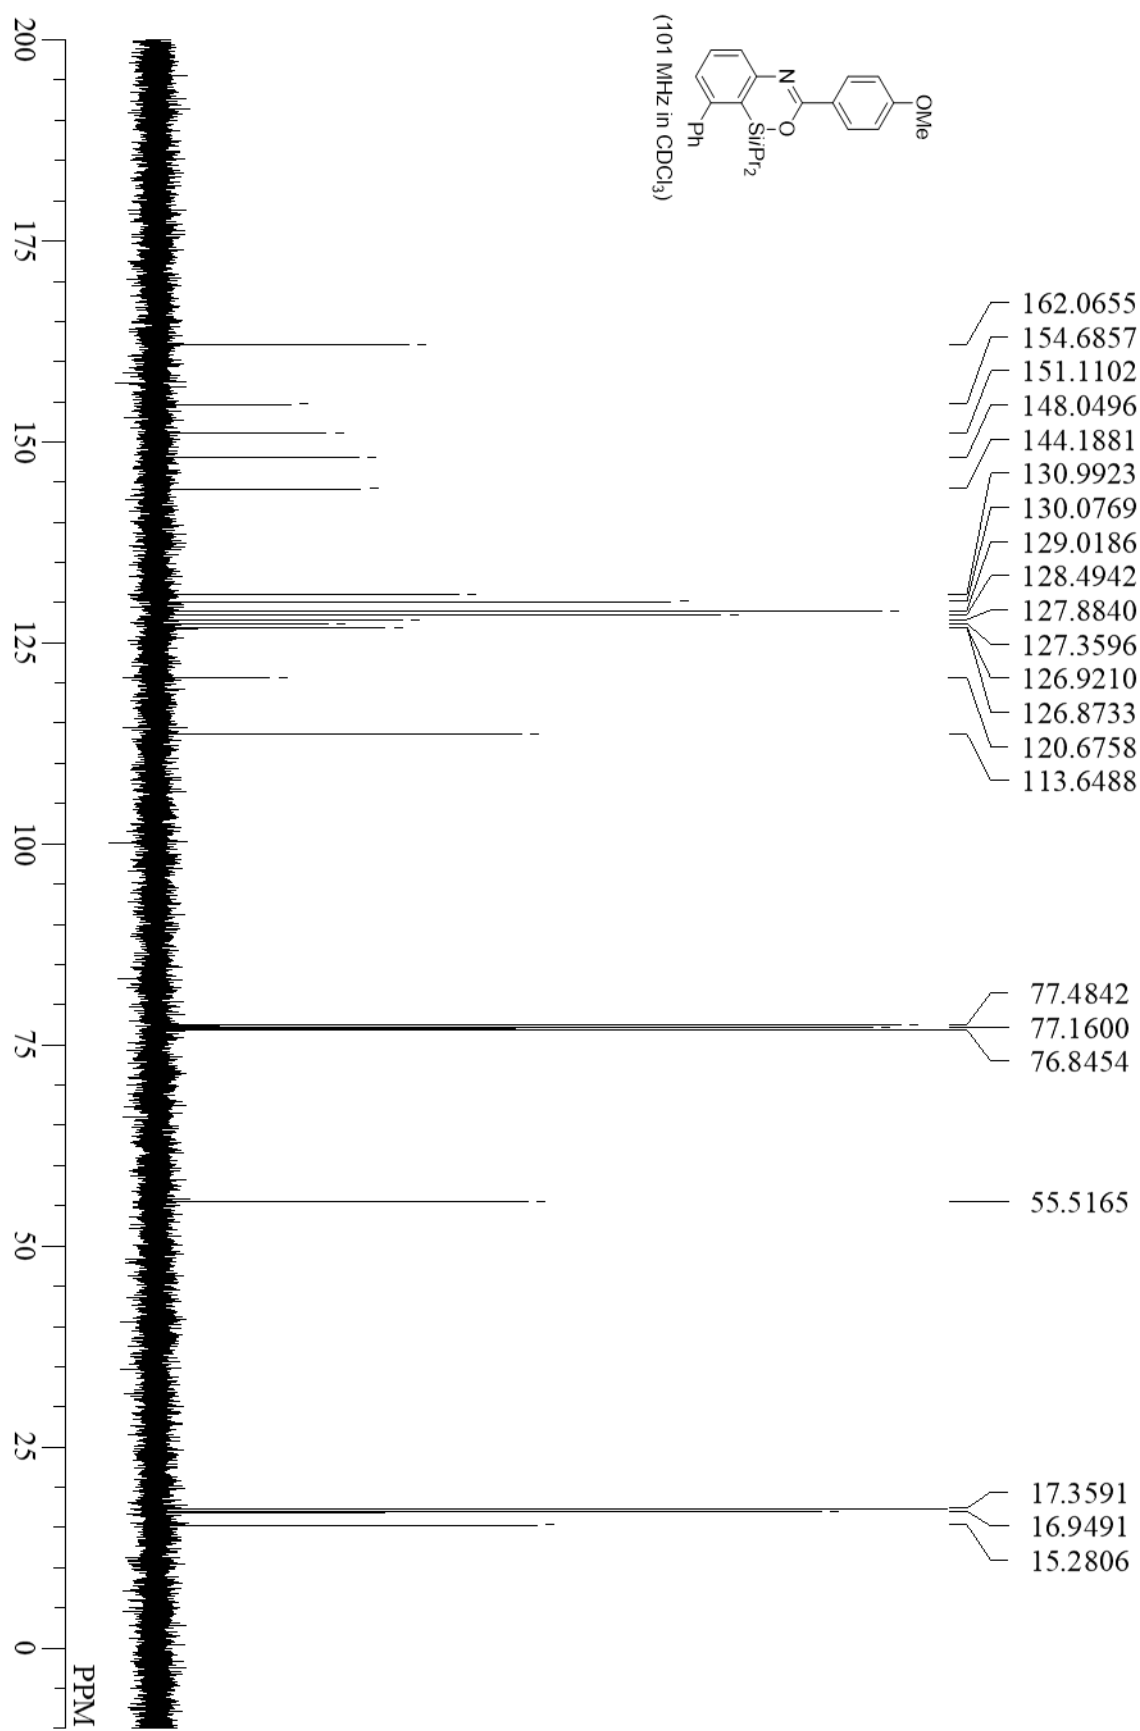



compound 3w

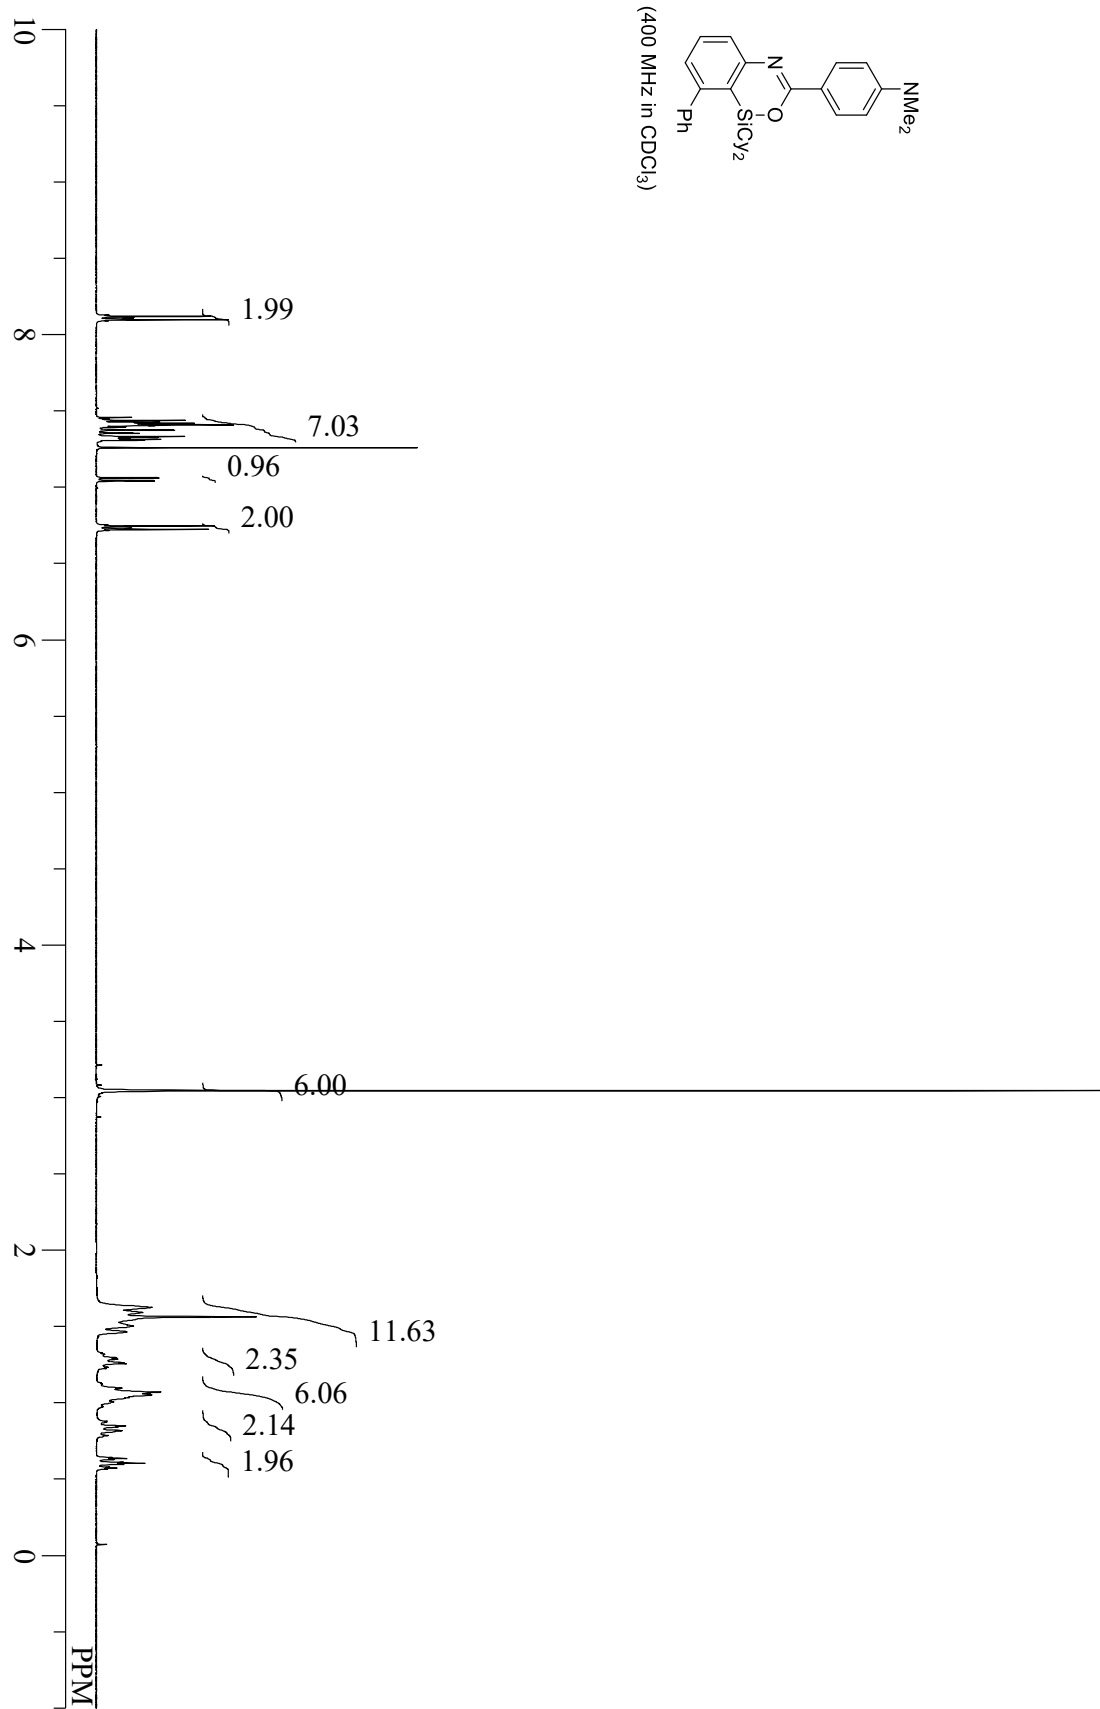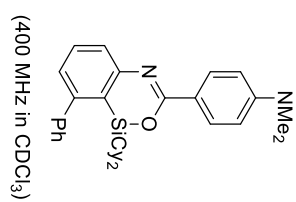

compound 3w

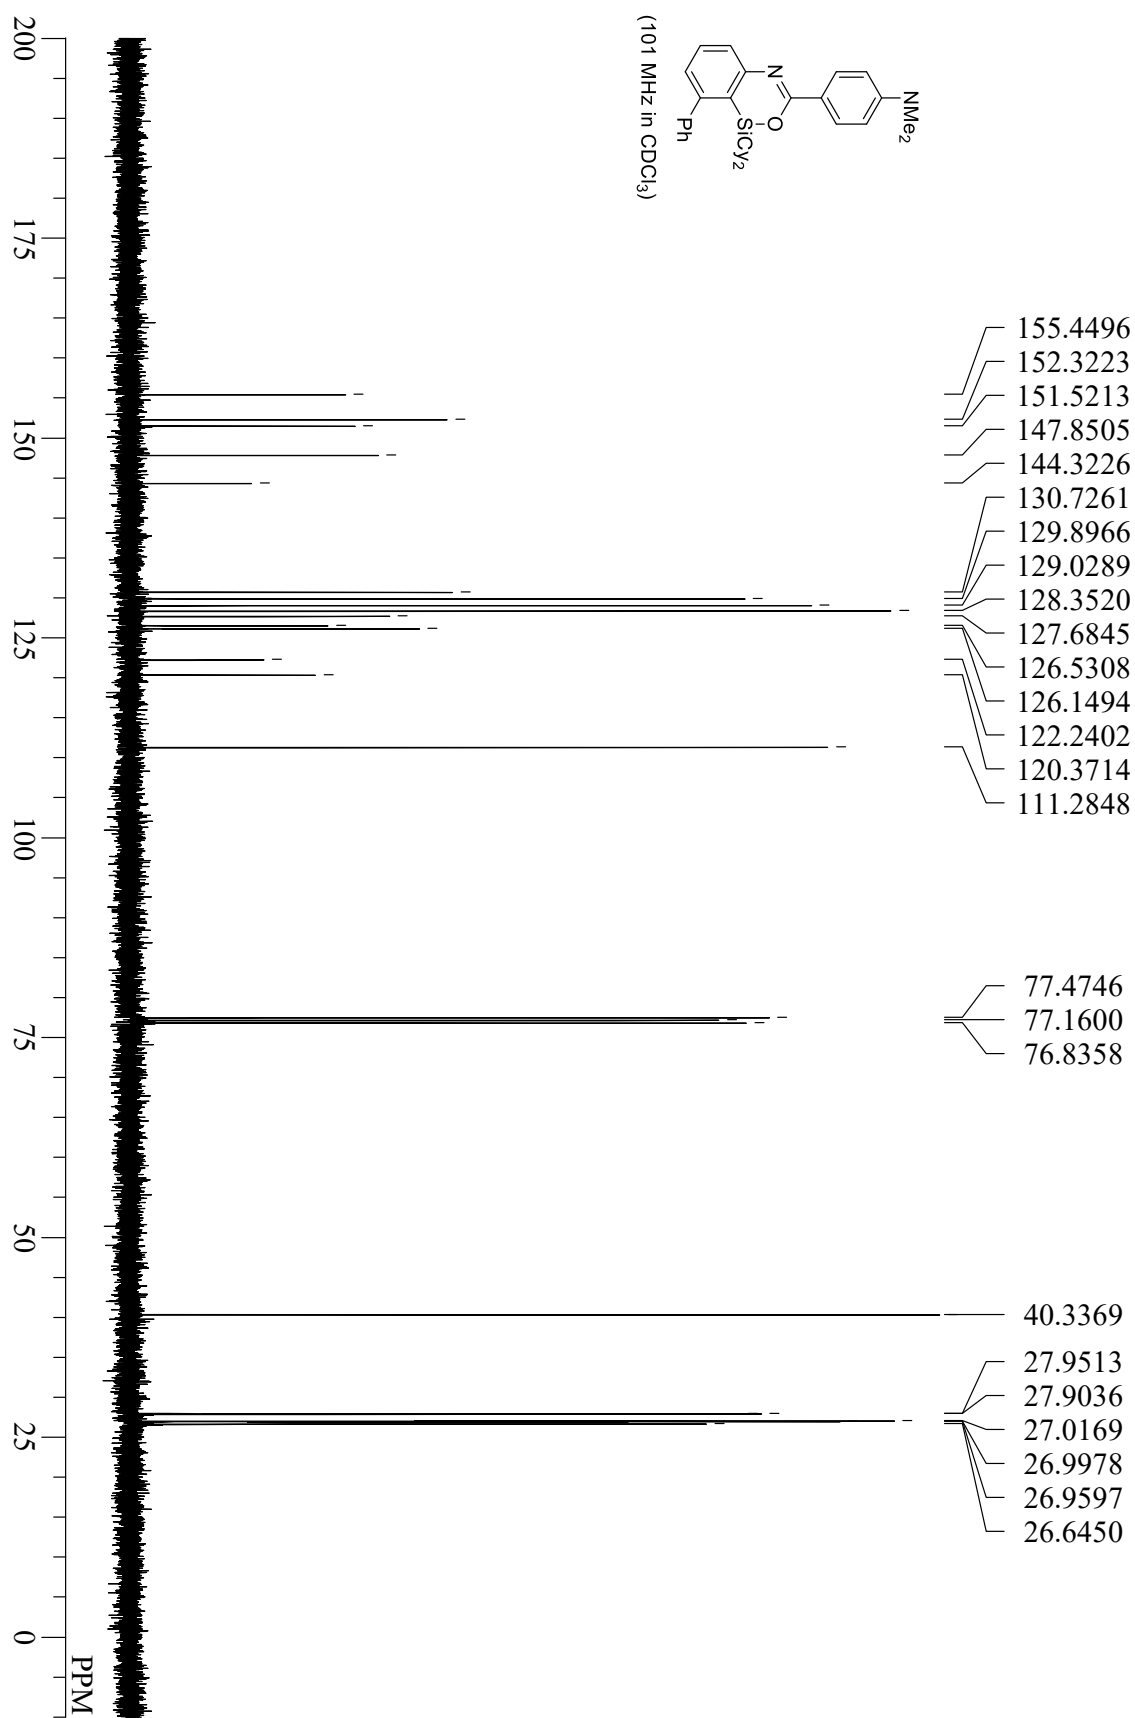

compound 3x

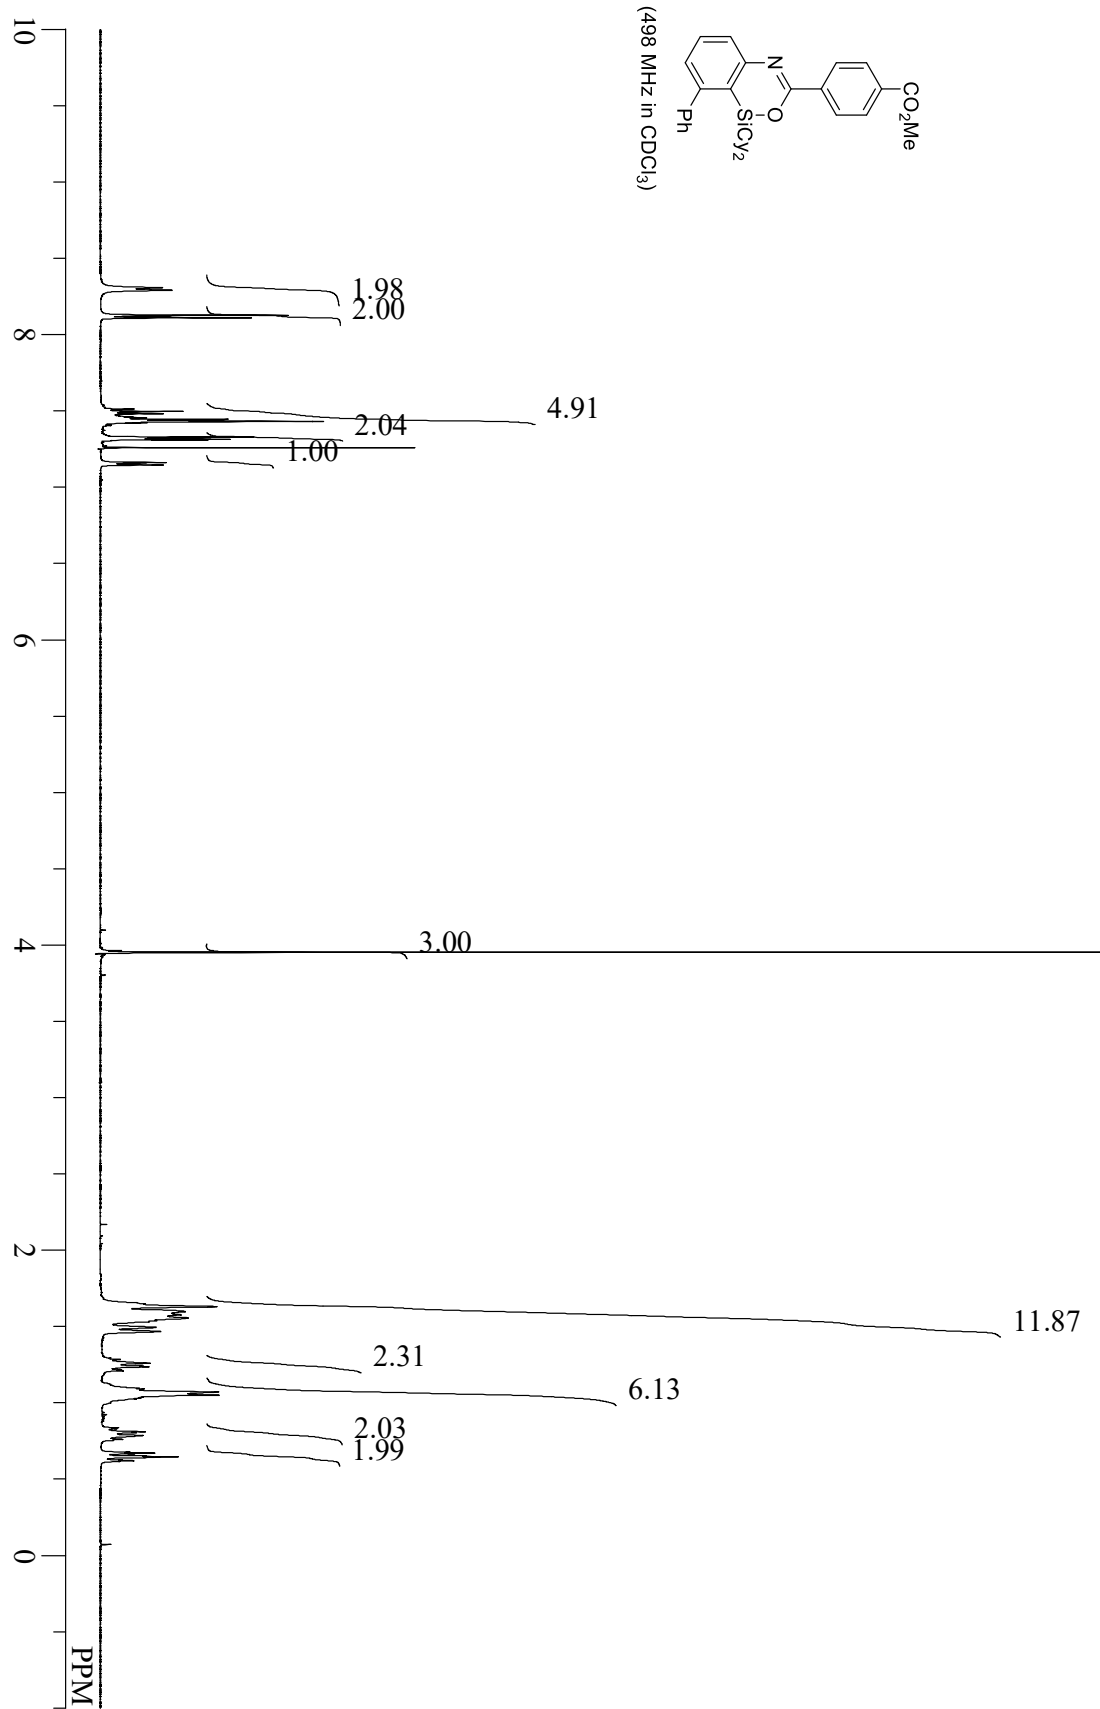

compound 3x

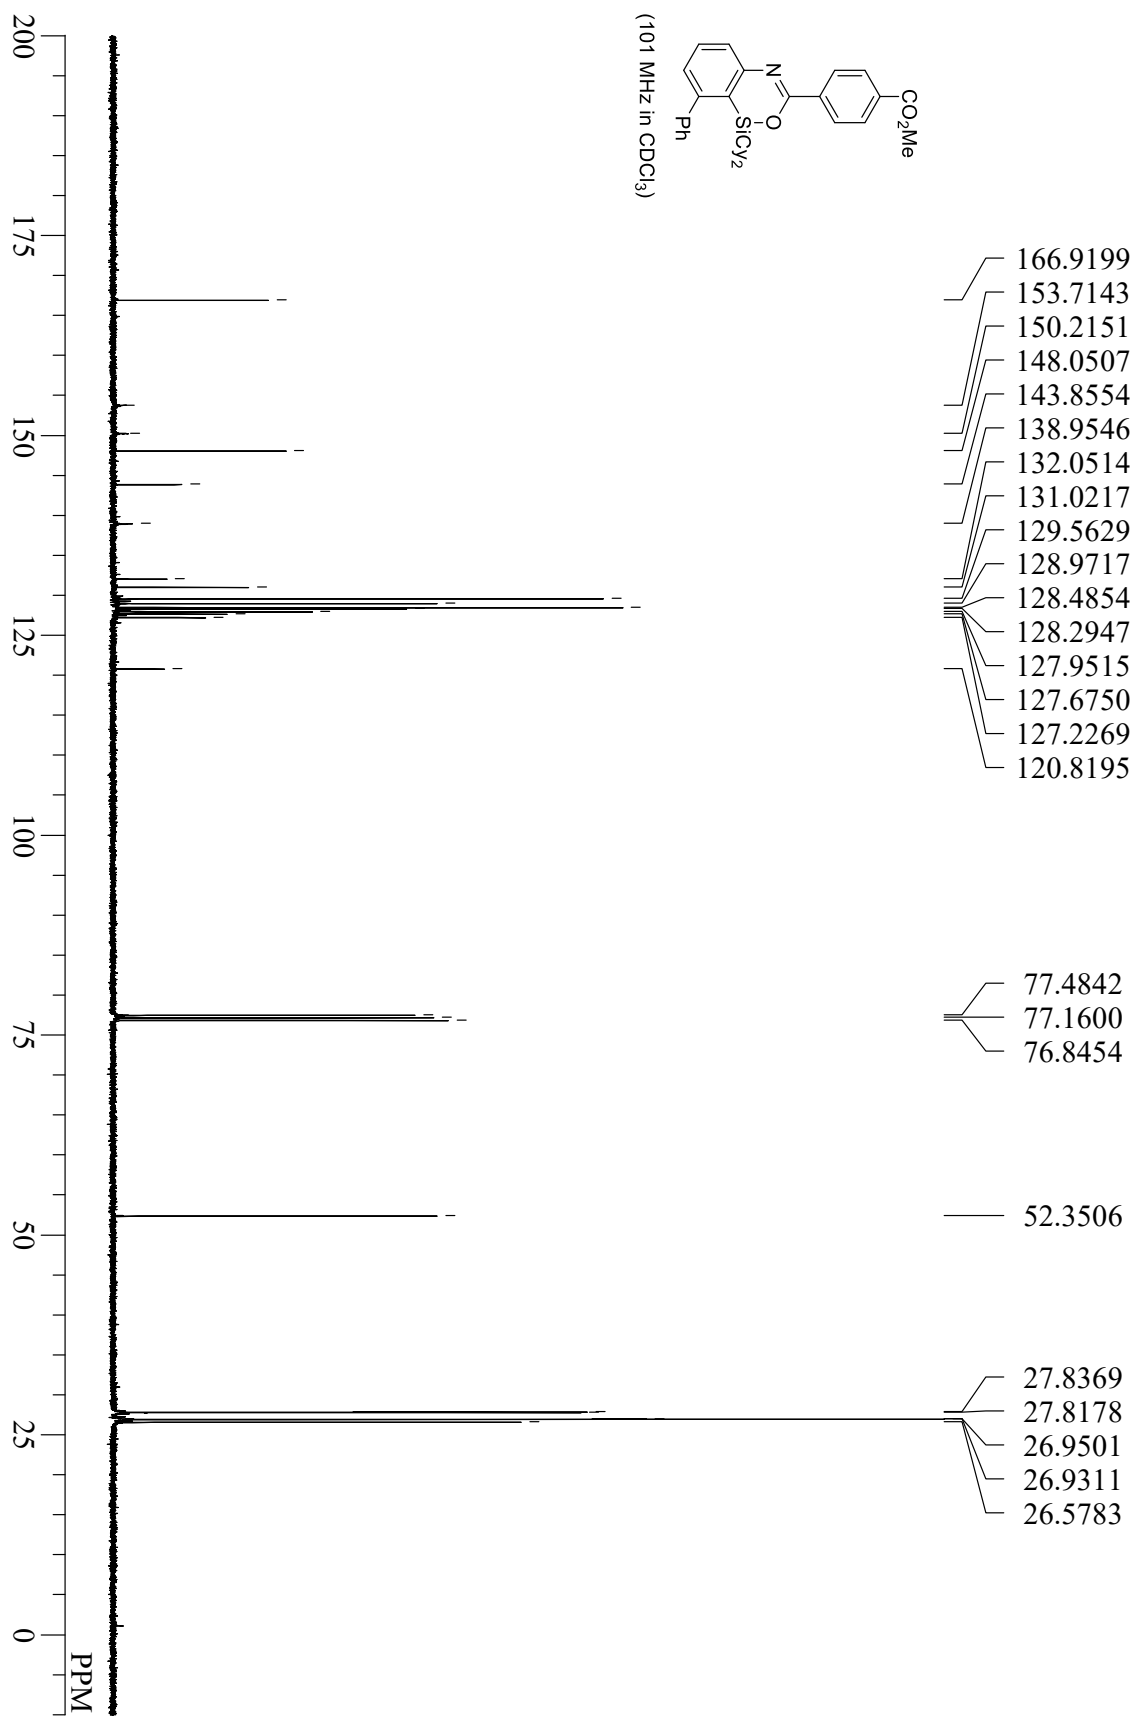

compound **3y**

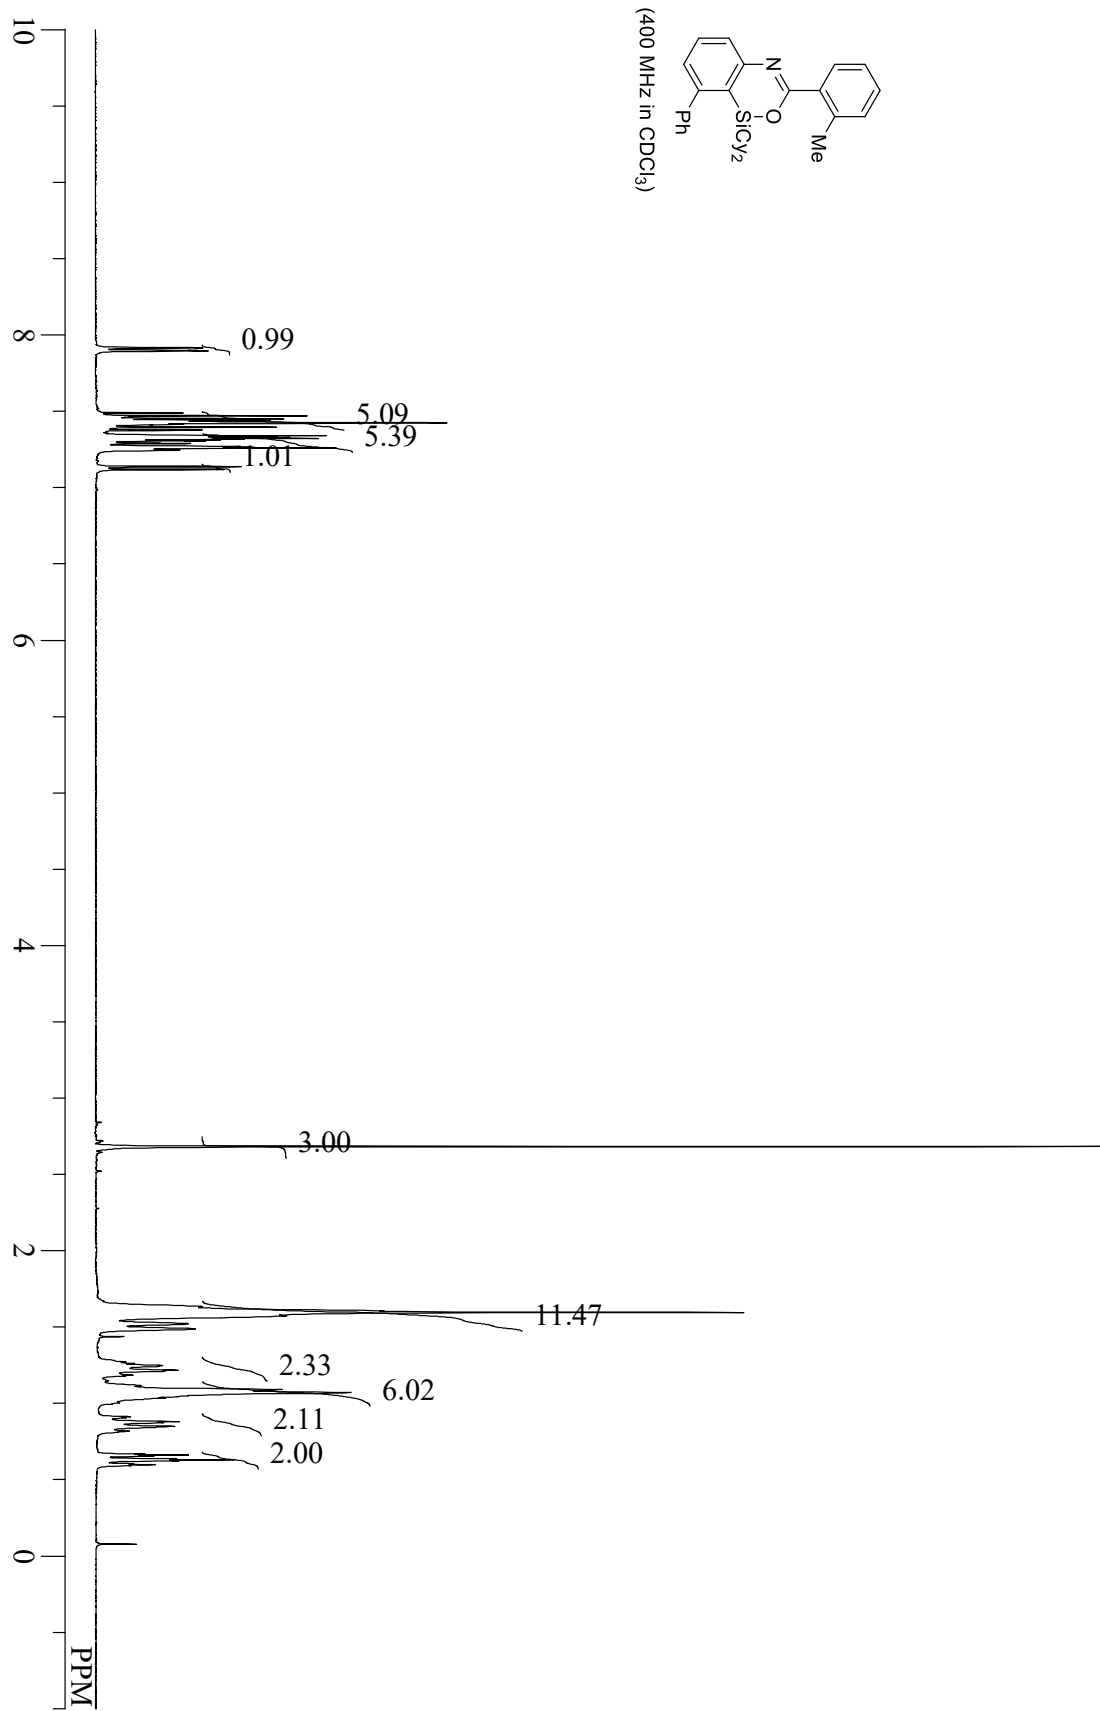

compound 3y

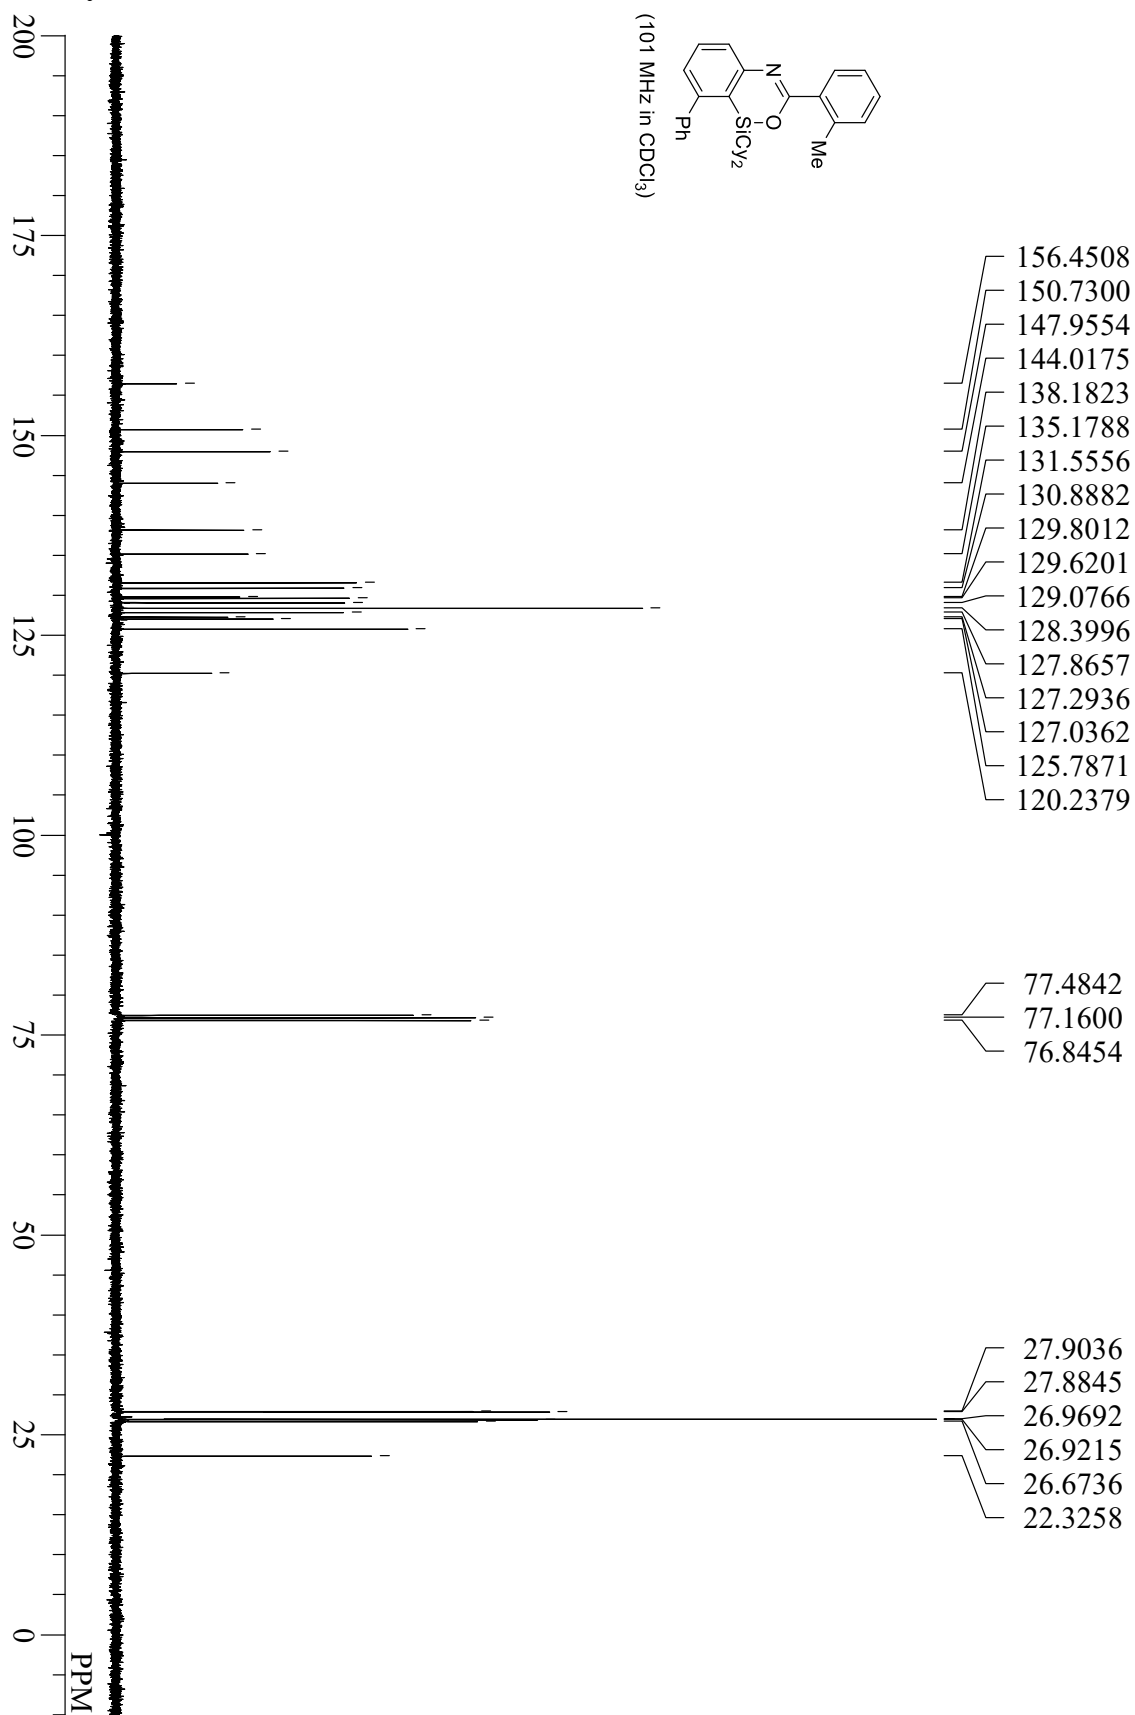

compound **3z**

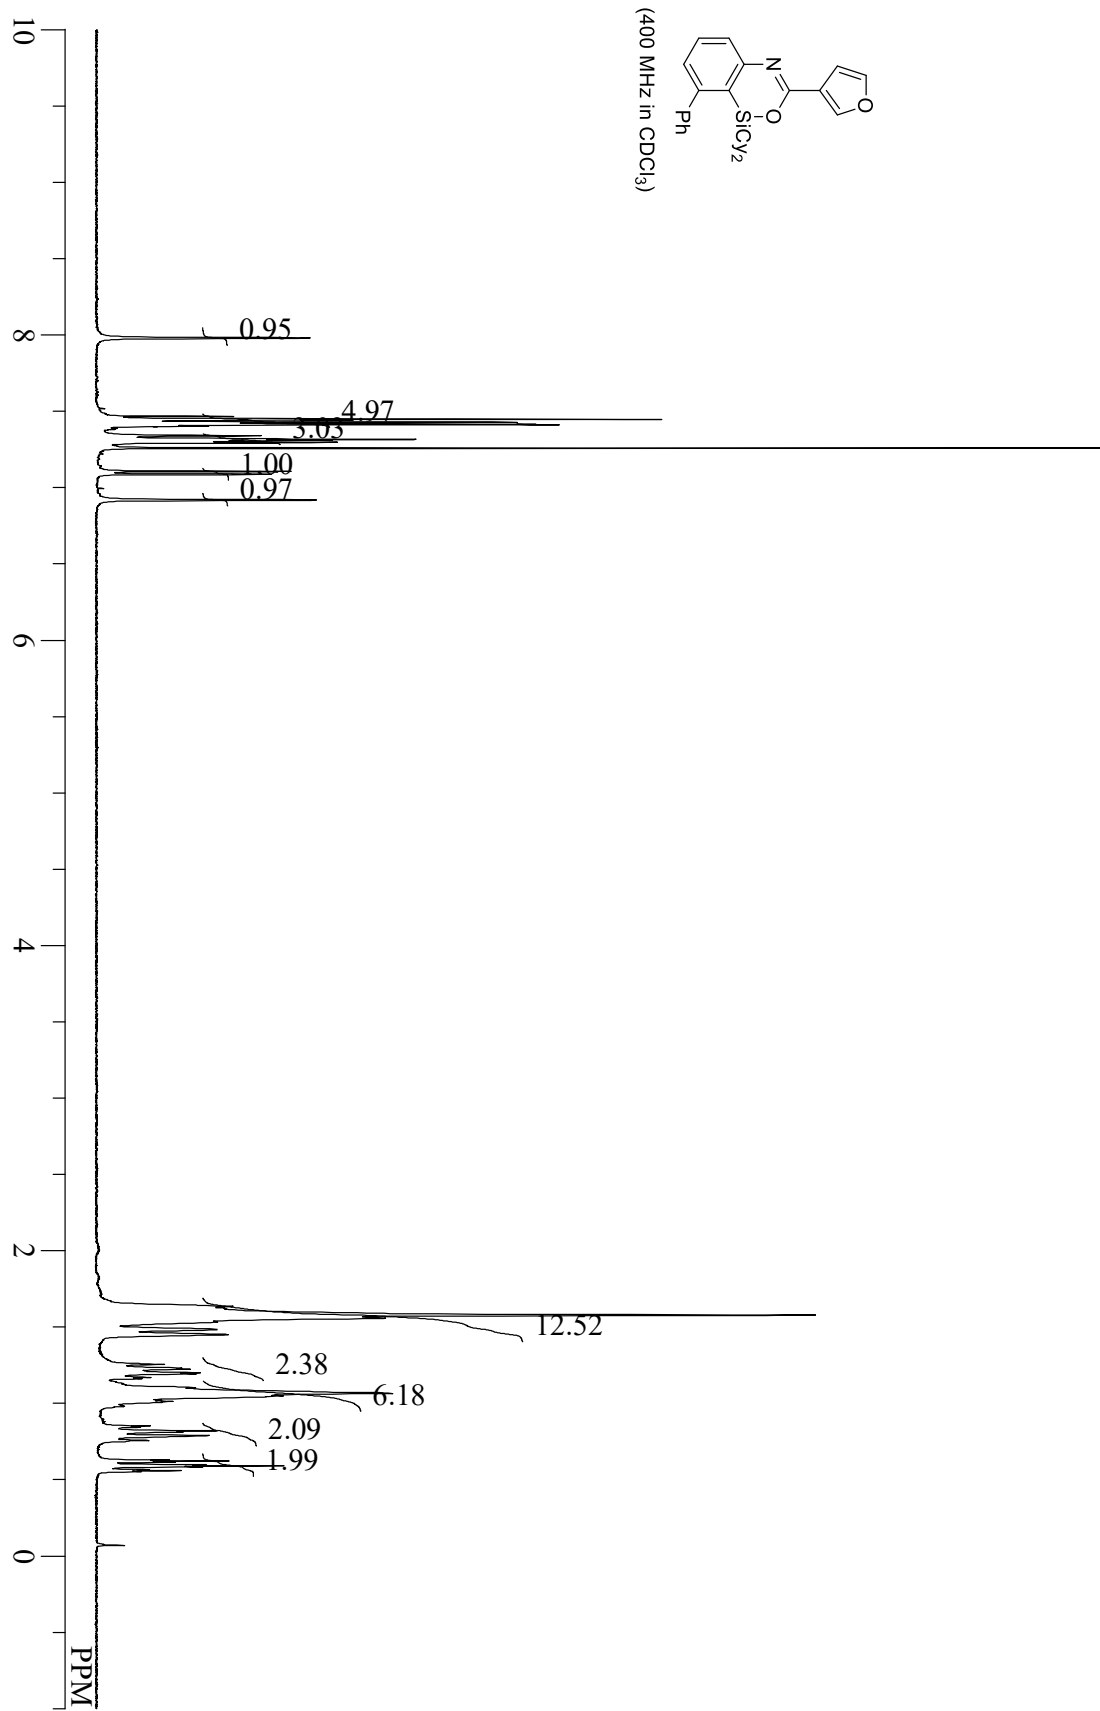

compound 3z

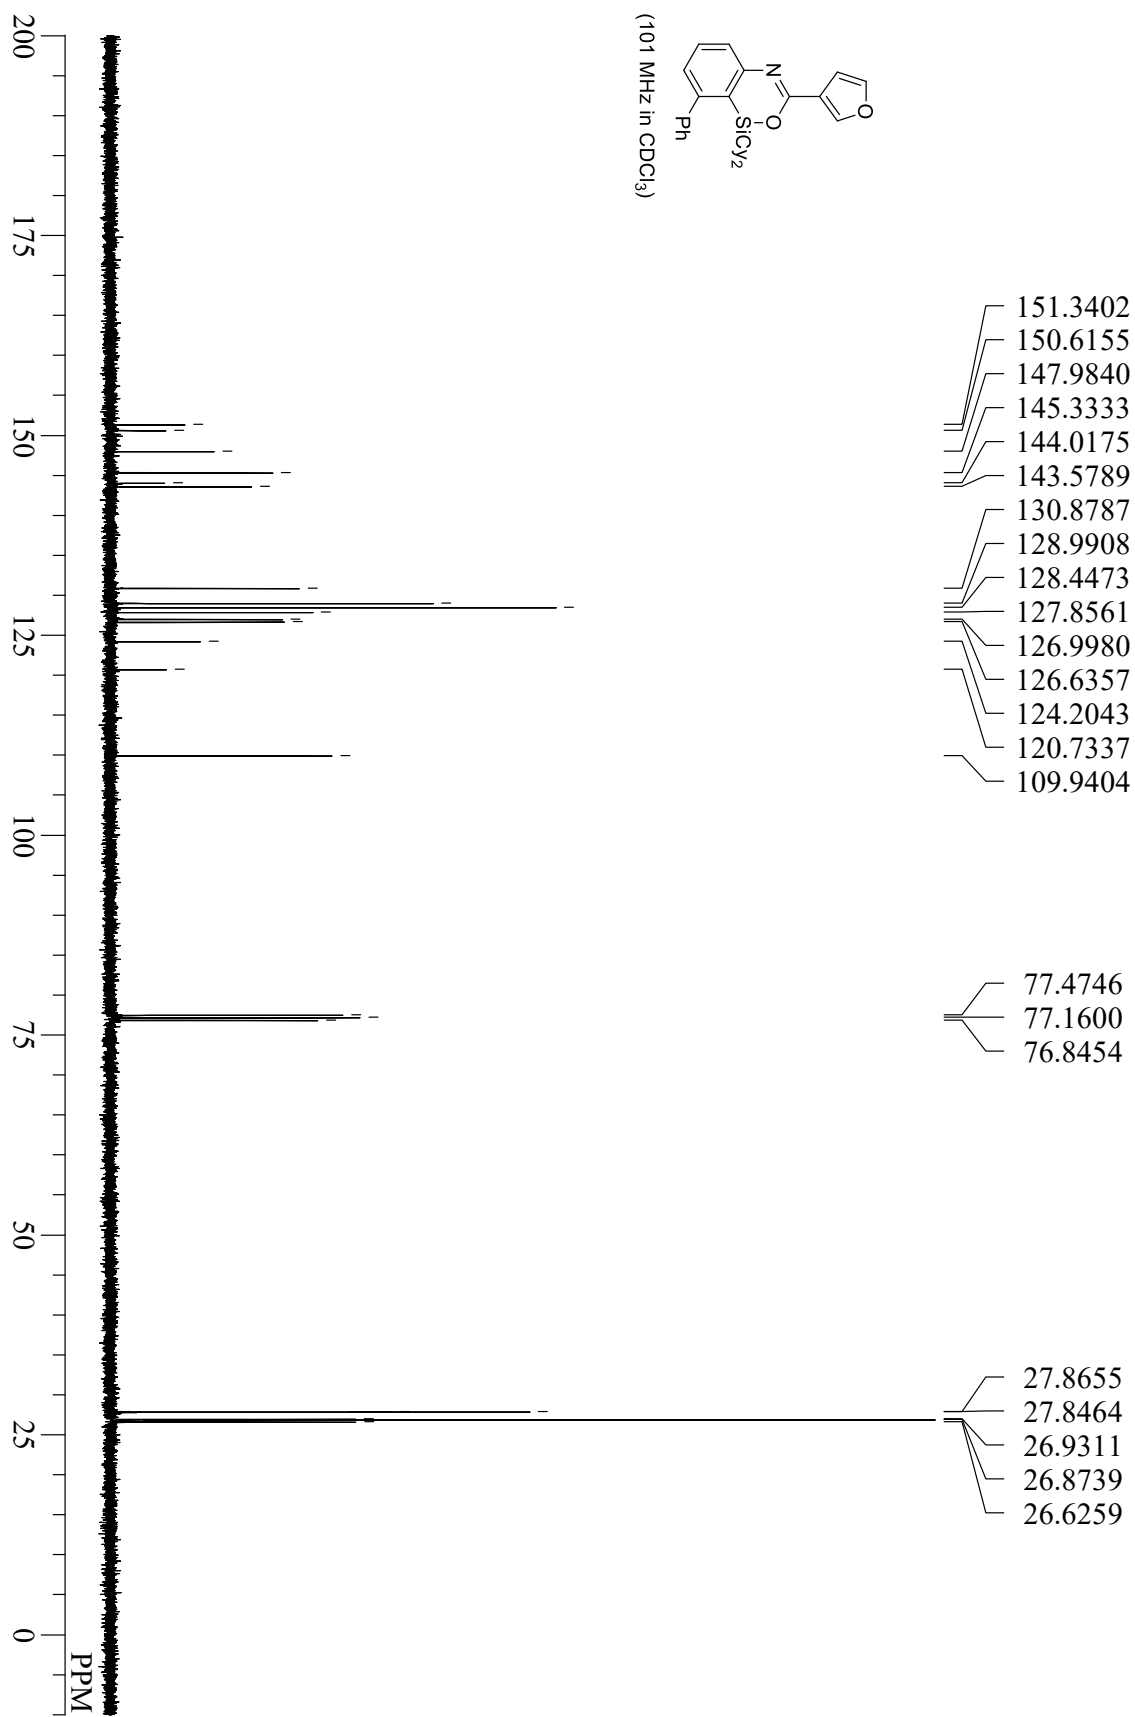



compound **3aa**

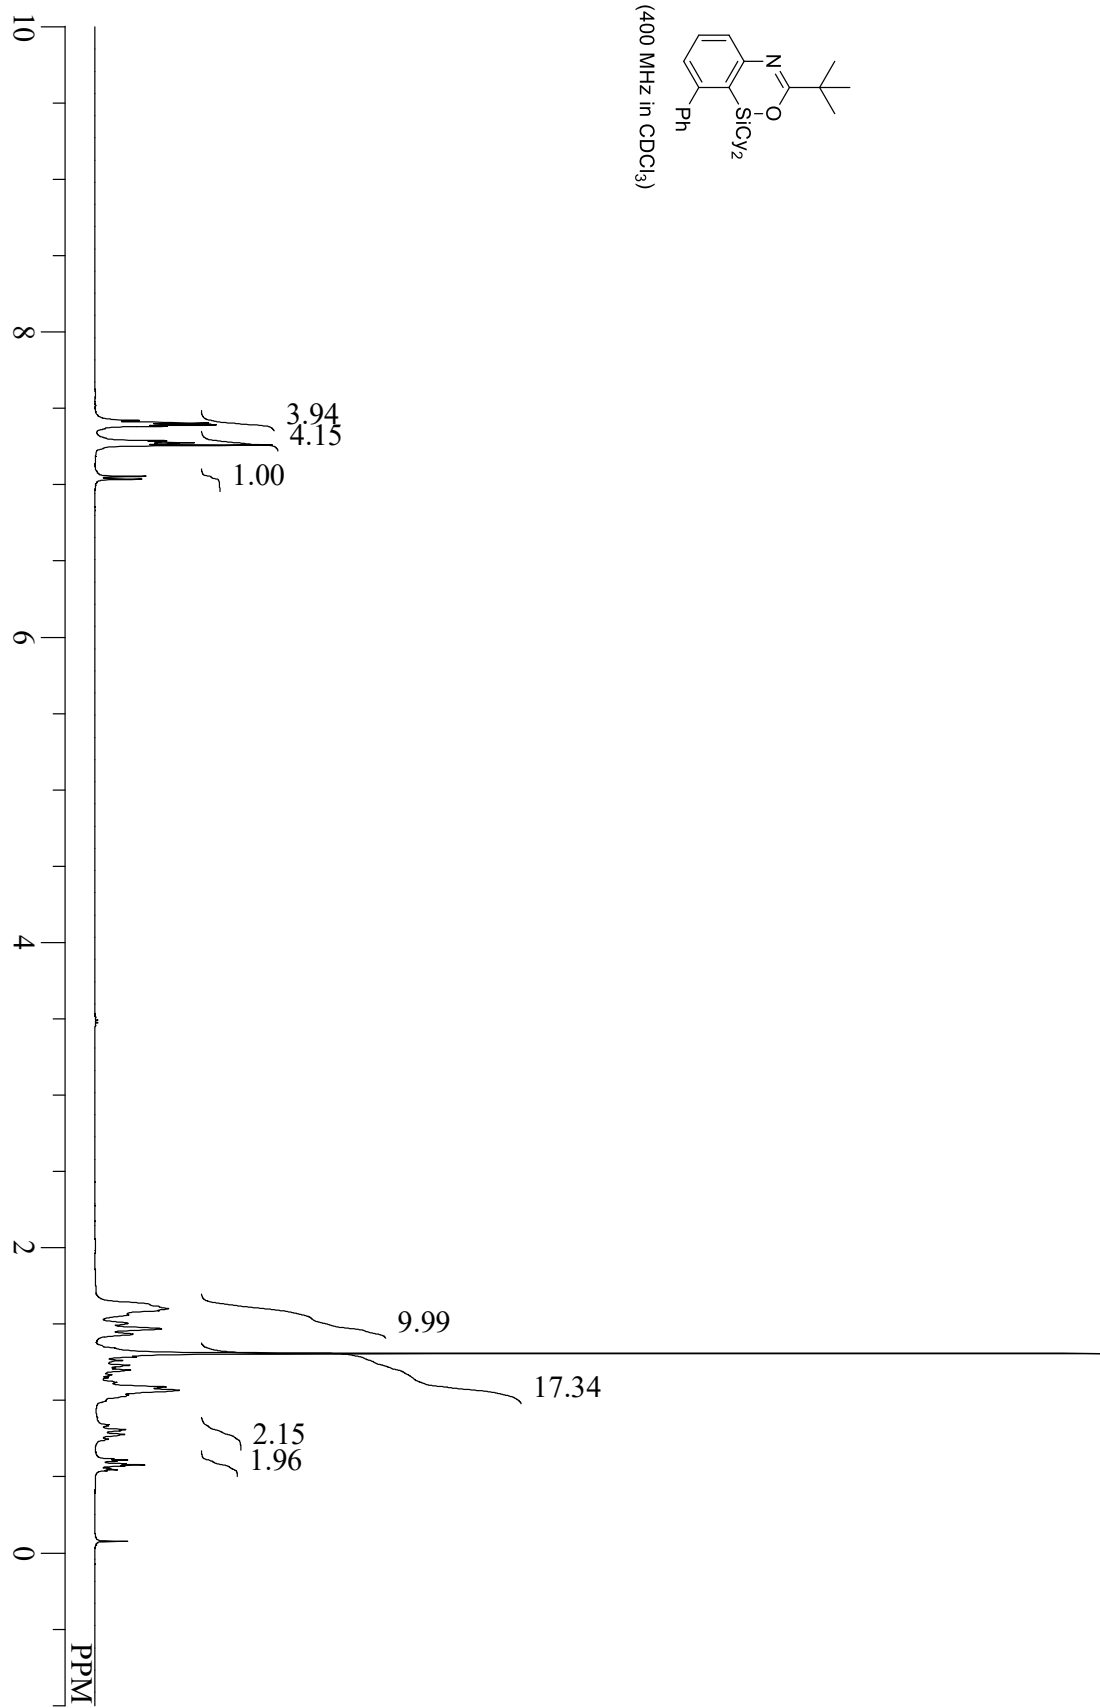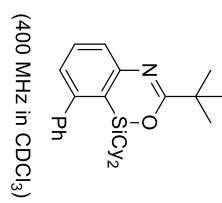

compound 3aa

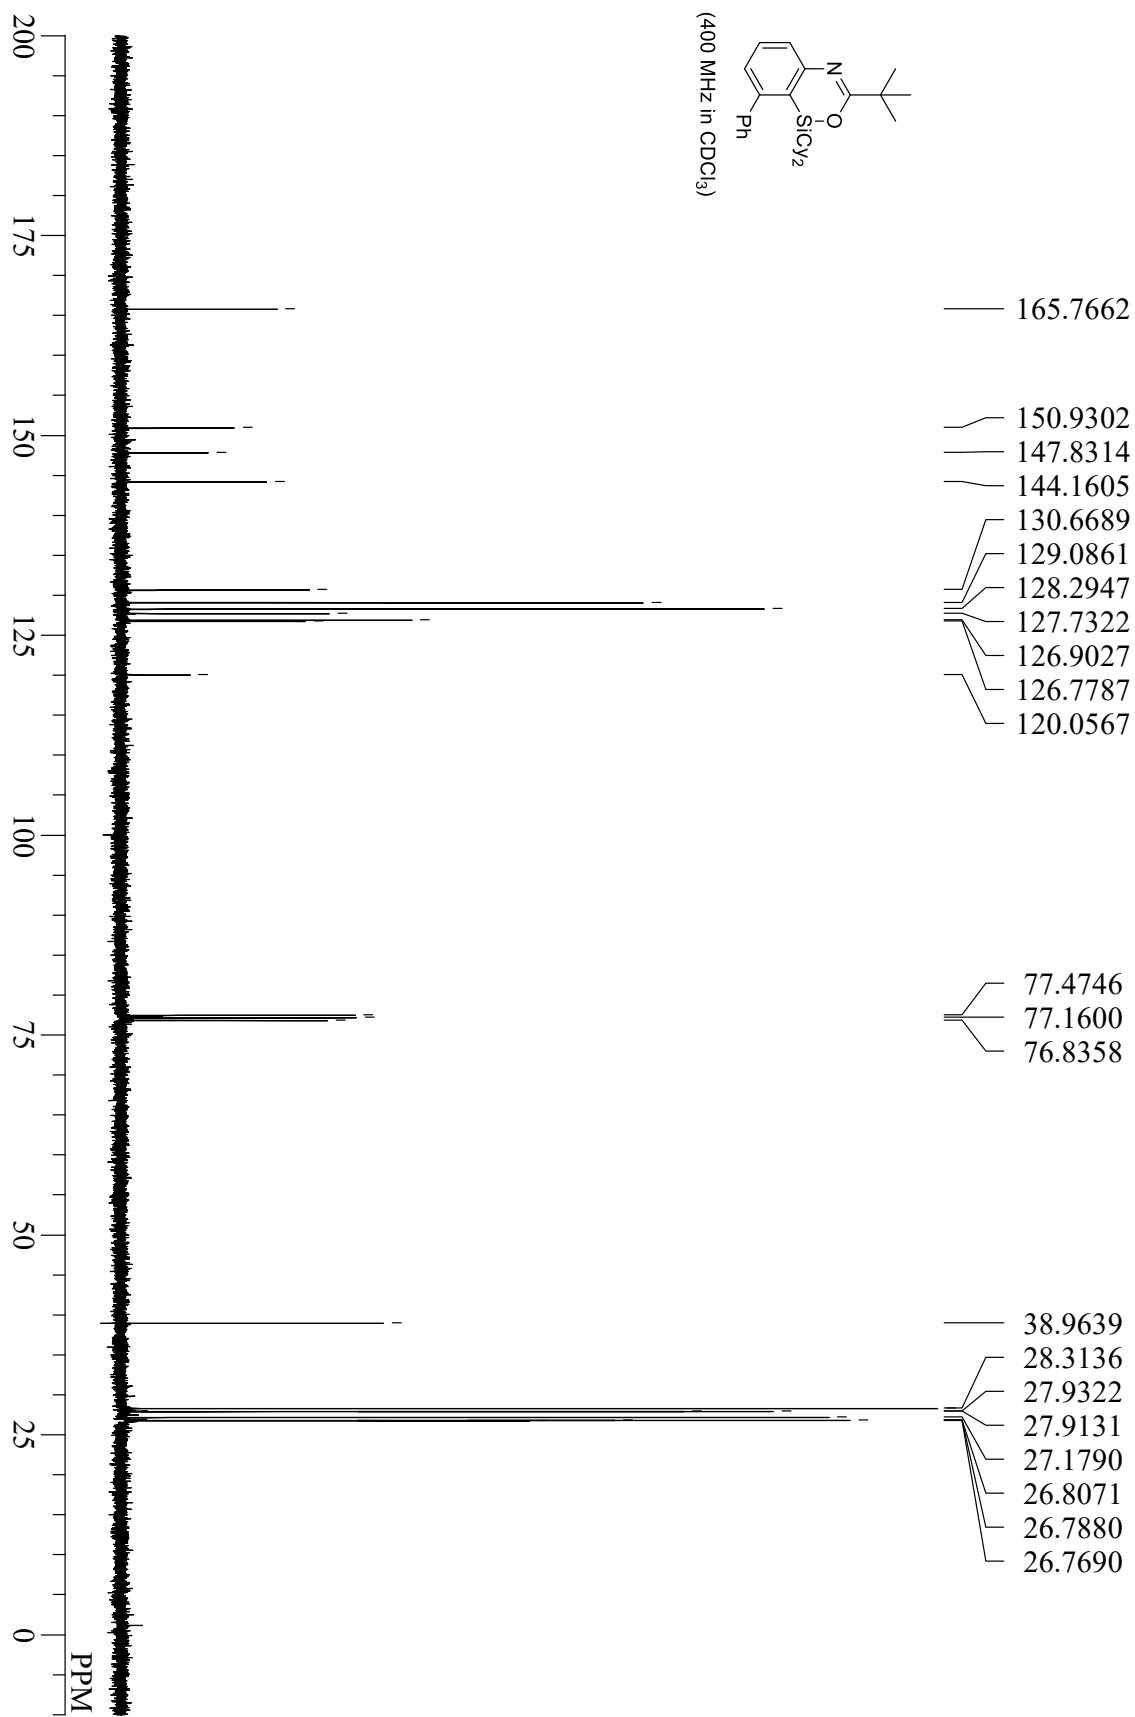

compound **3bb**

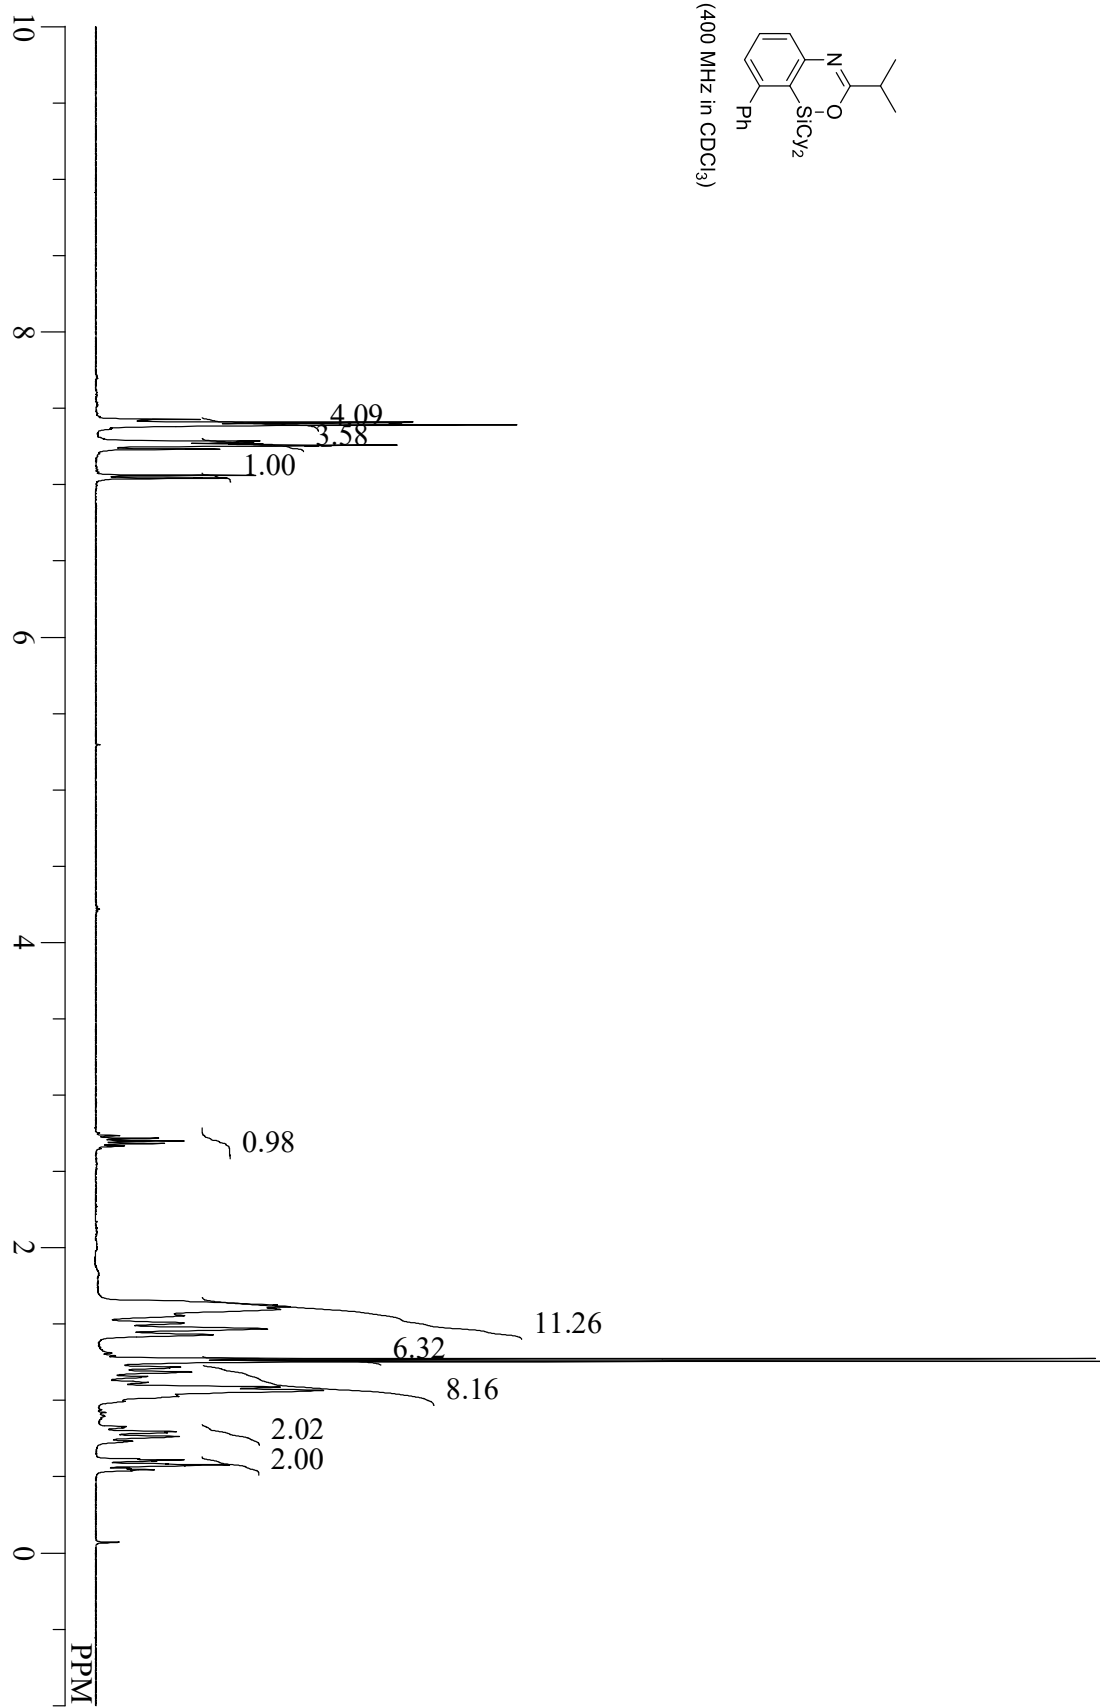

(400 MHz in CDCl<sub>3</sub>)

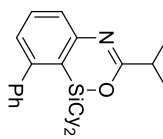

compound **3bb**

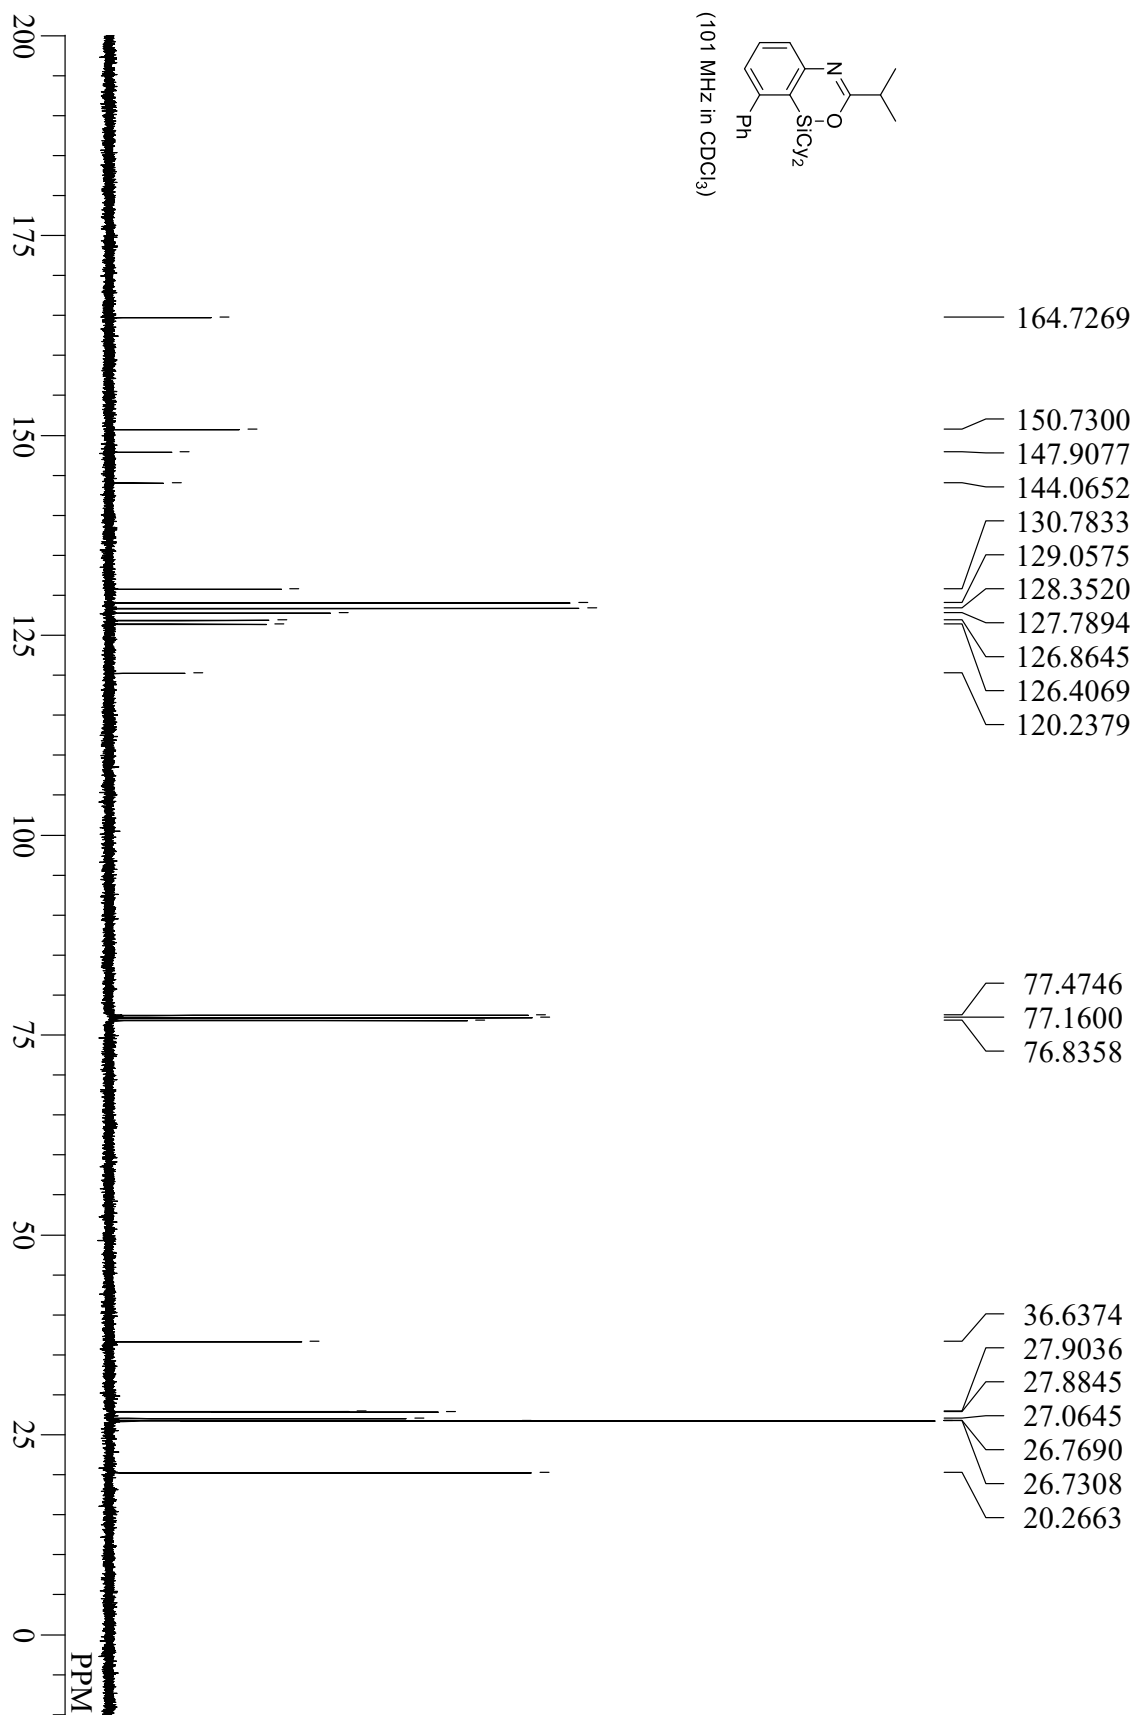

compound **3cc**

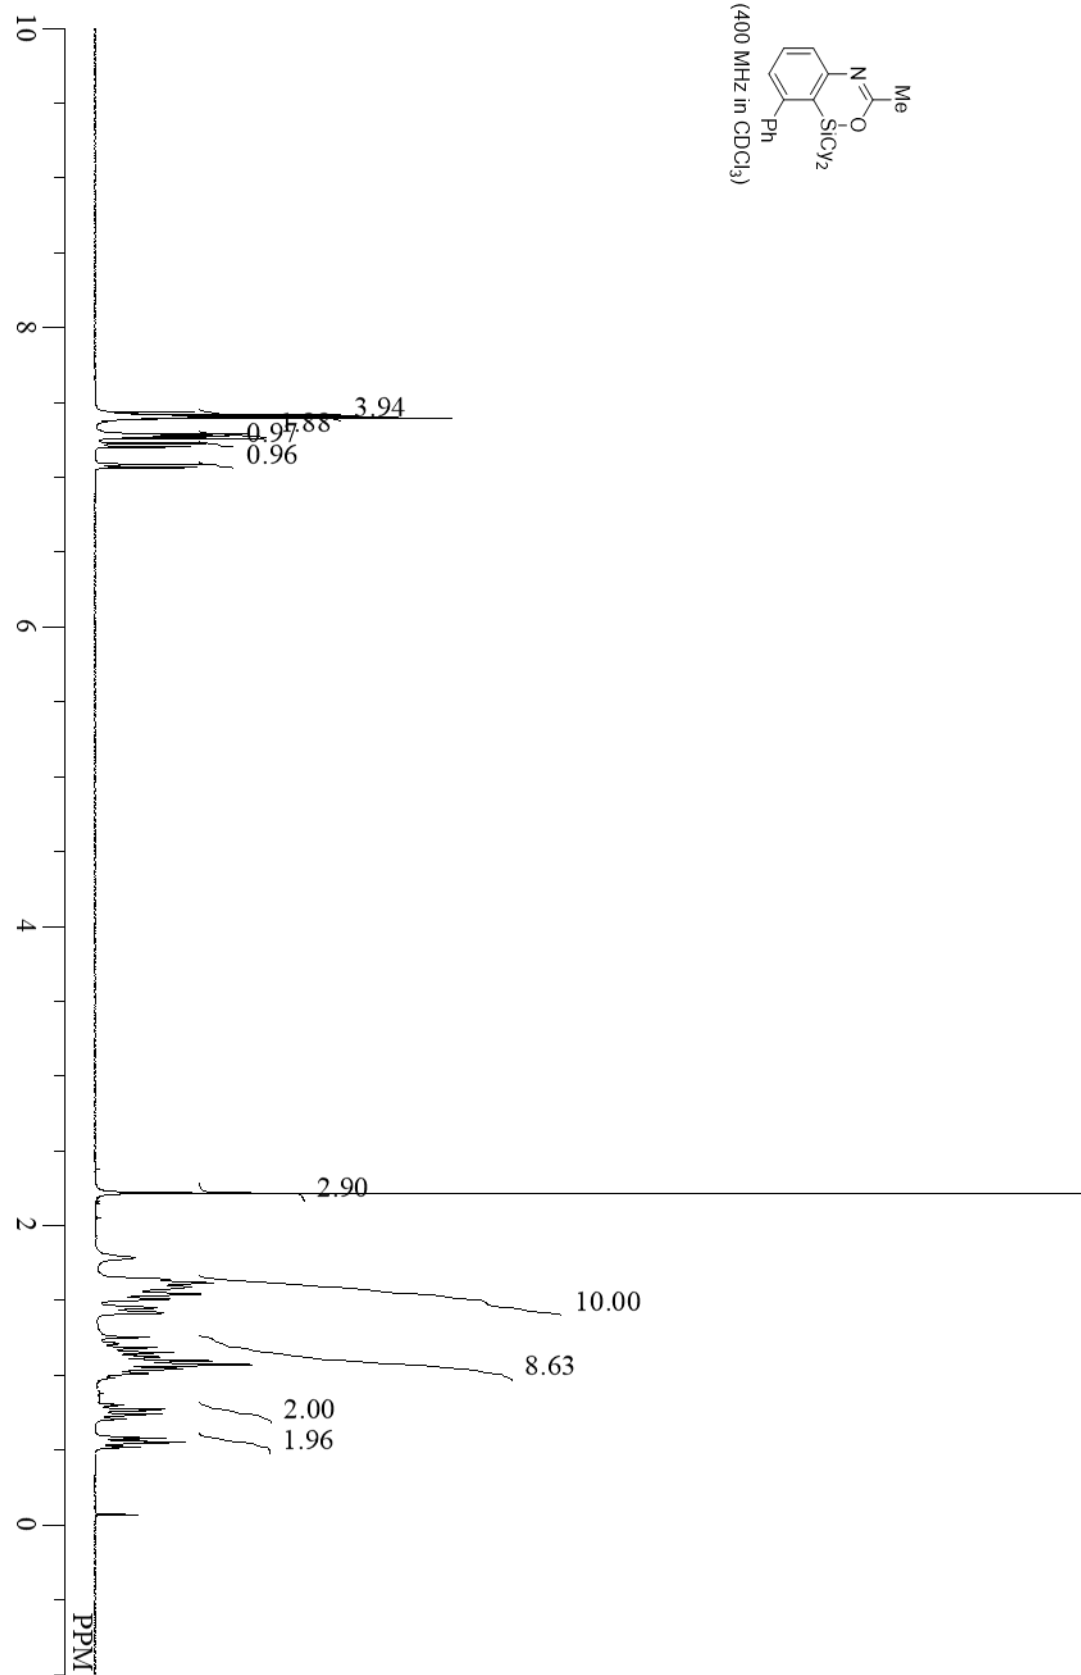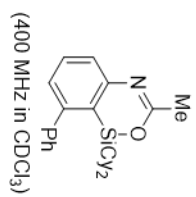

compound 3cc

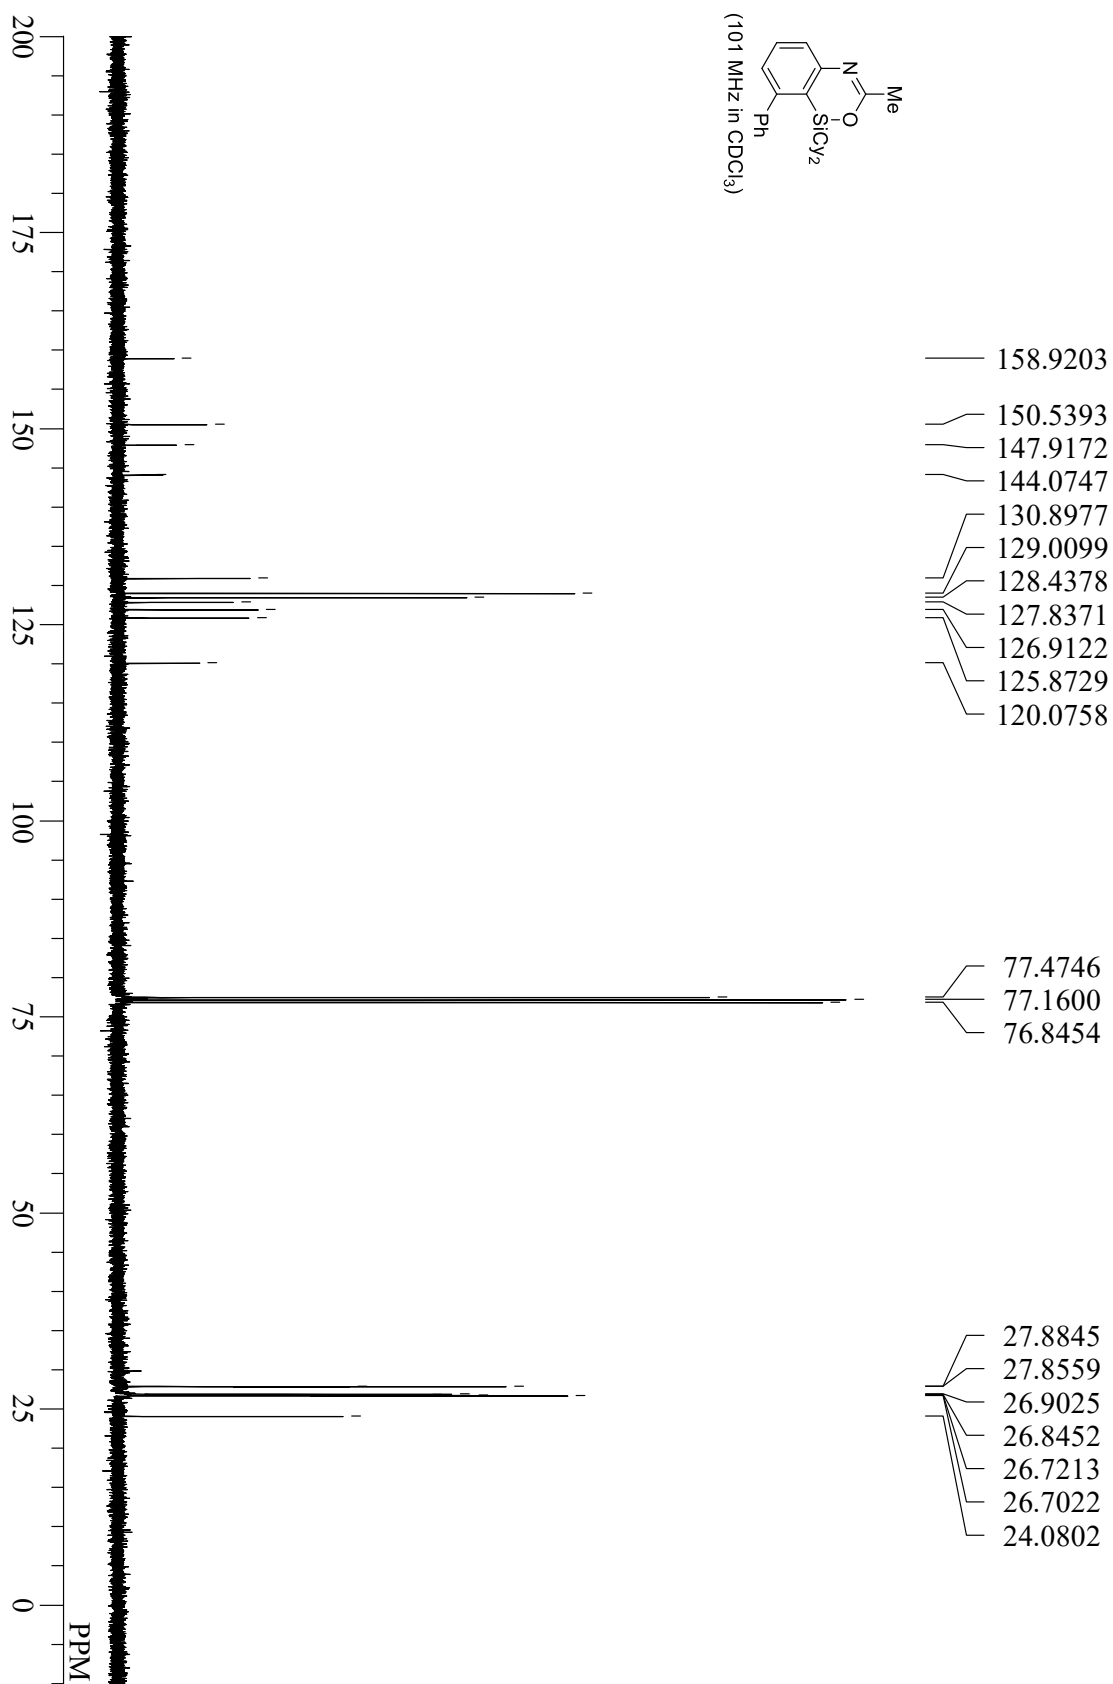

compound **3dd**

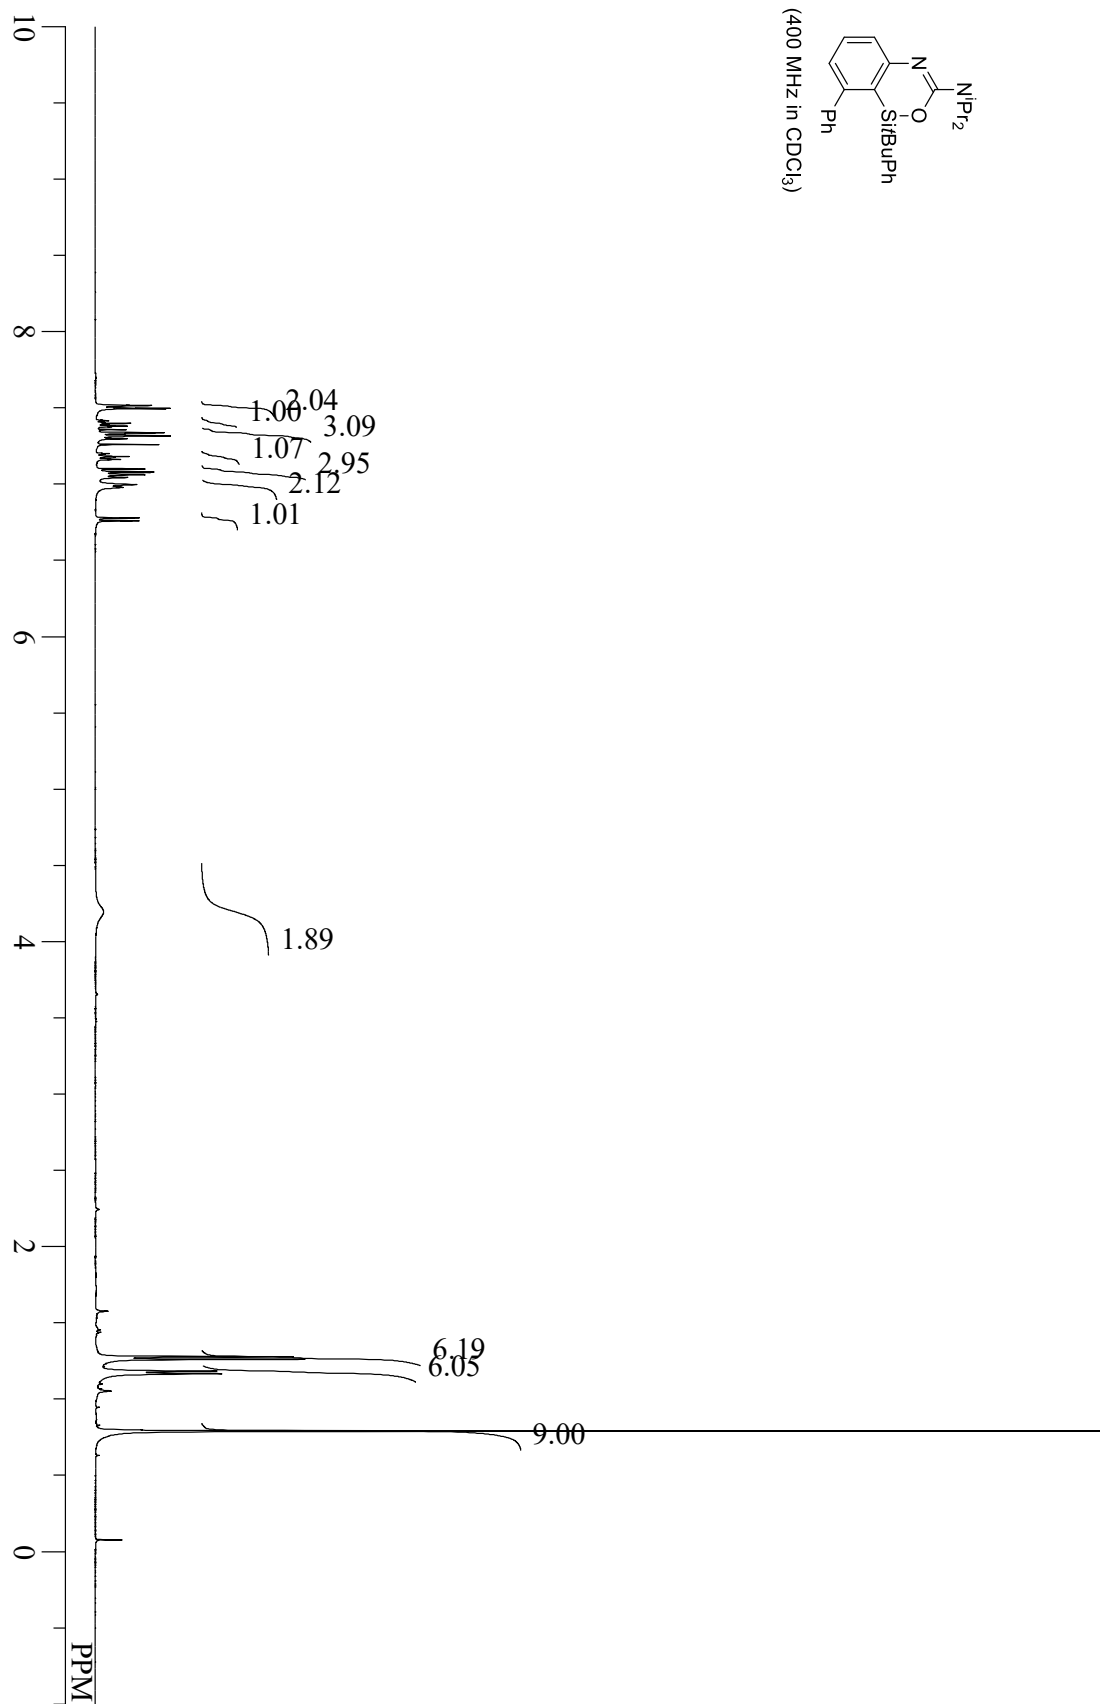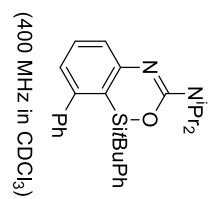

compound **3dd**

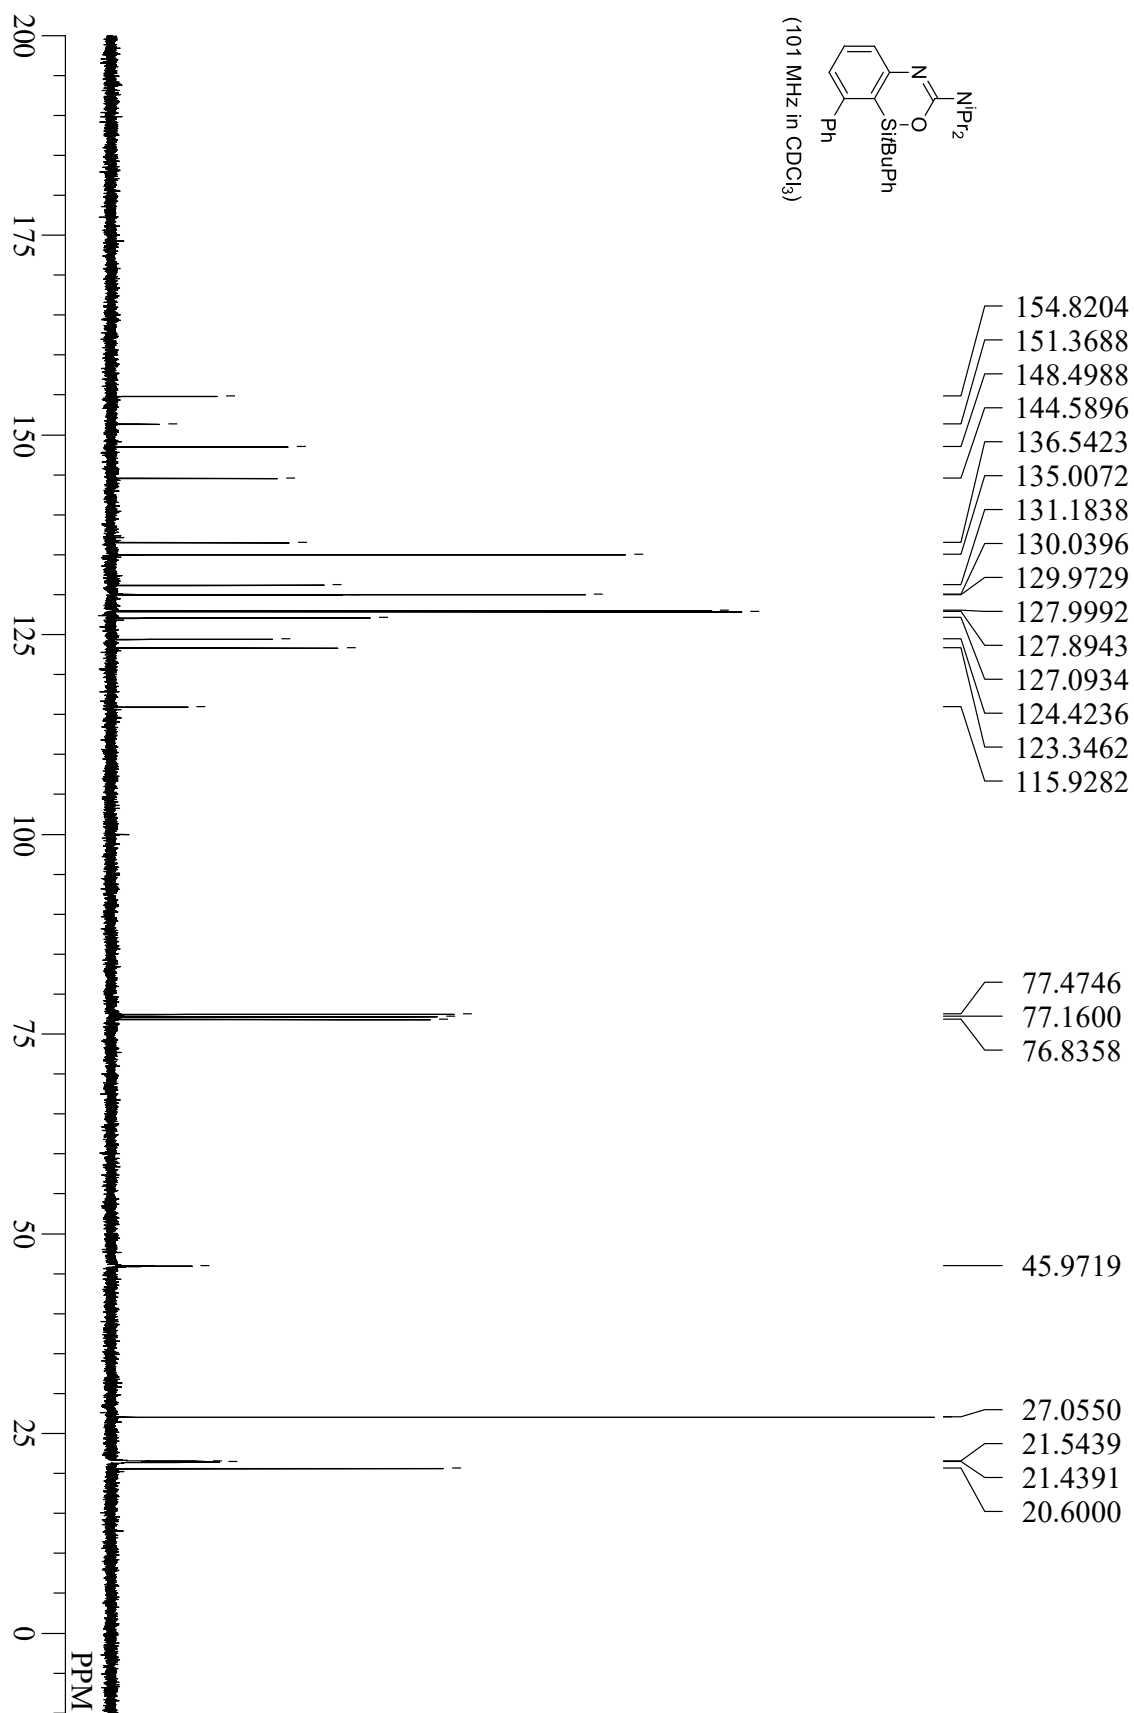



compound **3ee**

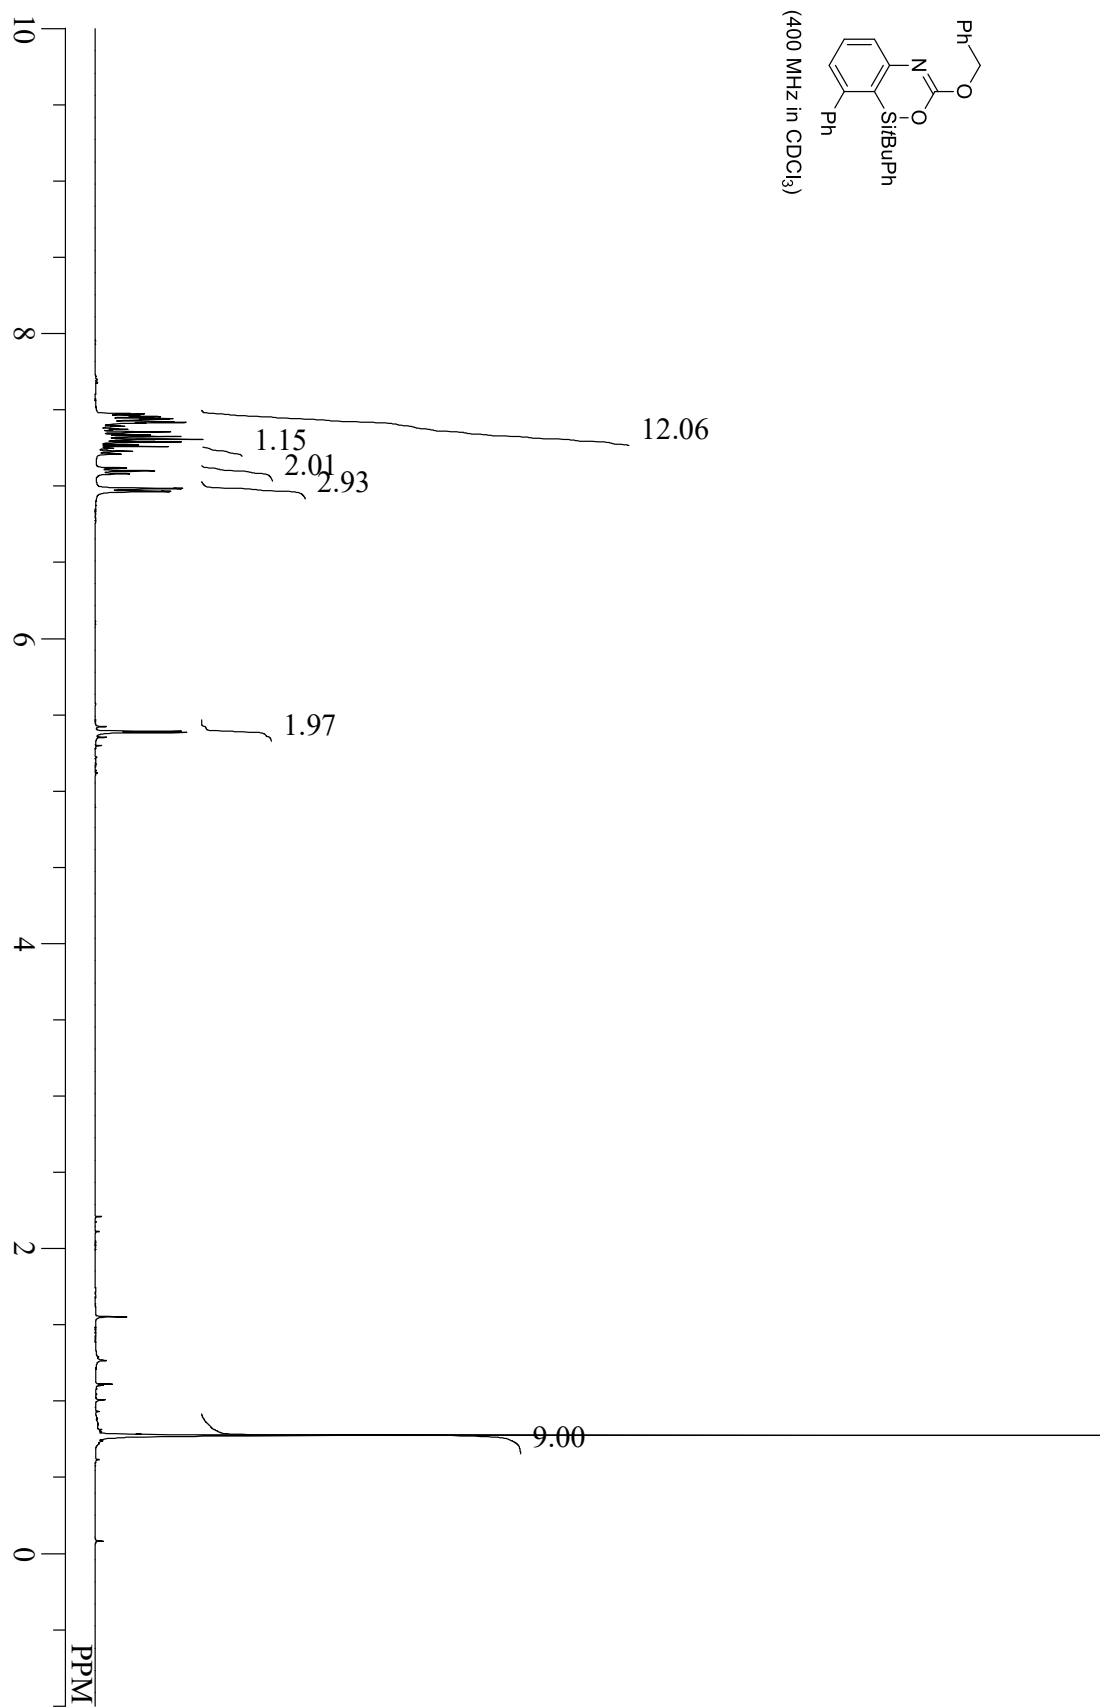

compound 3ee

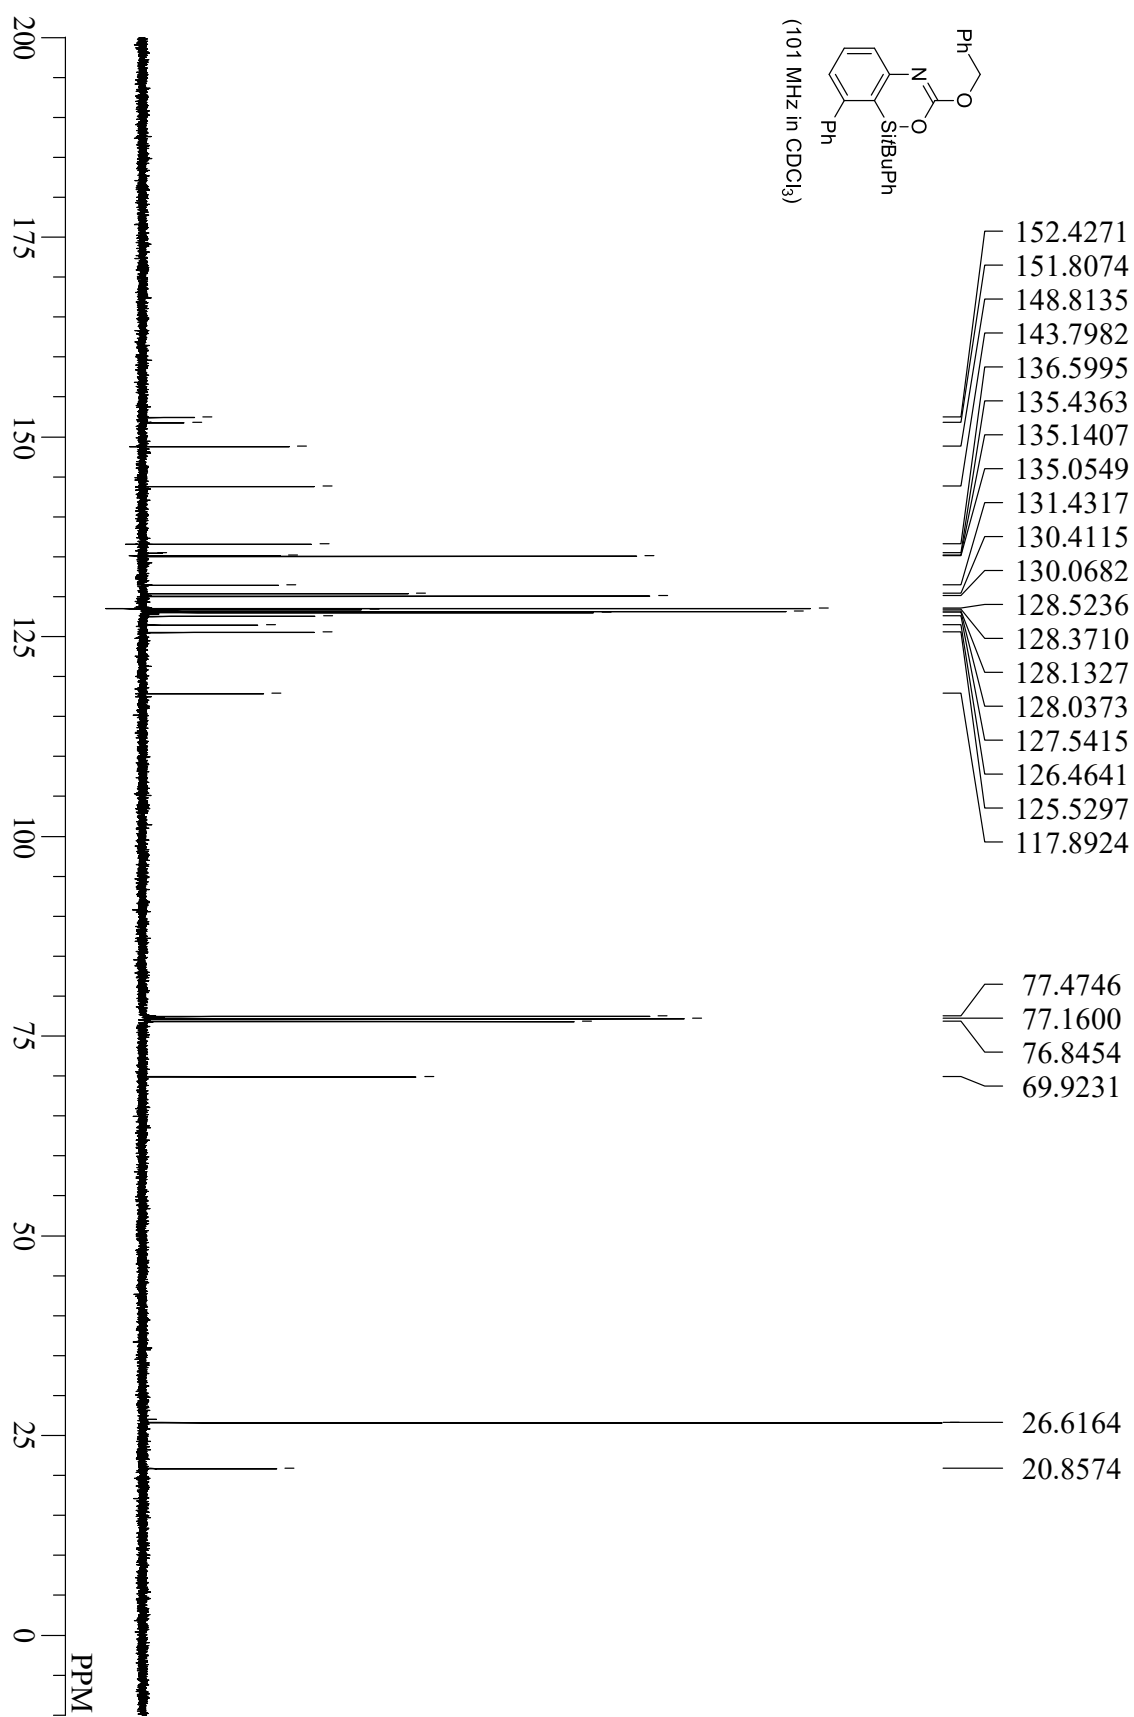

compound **3gg**

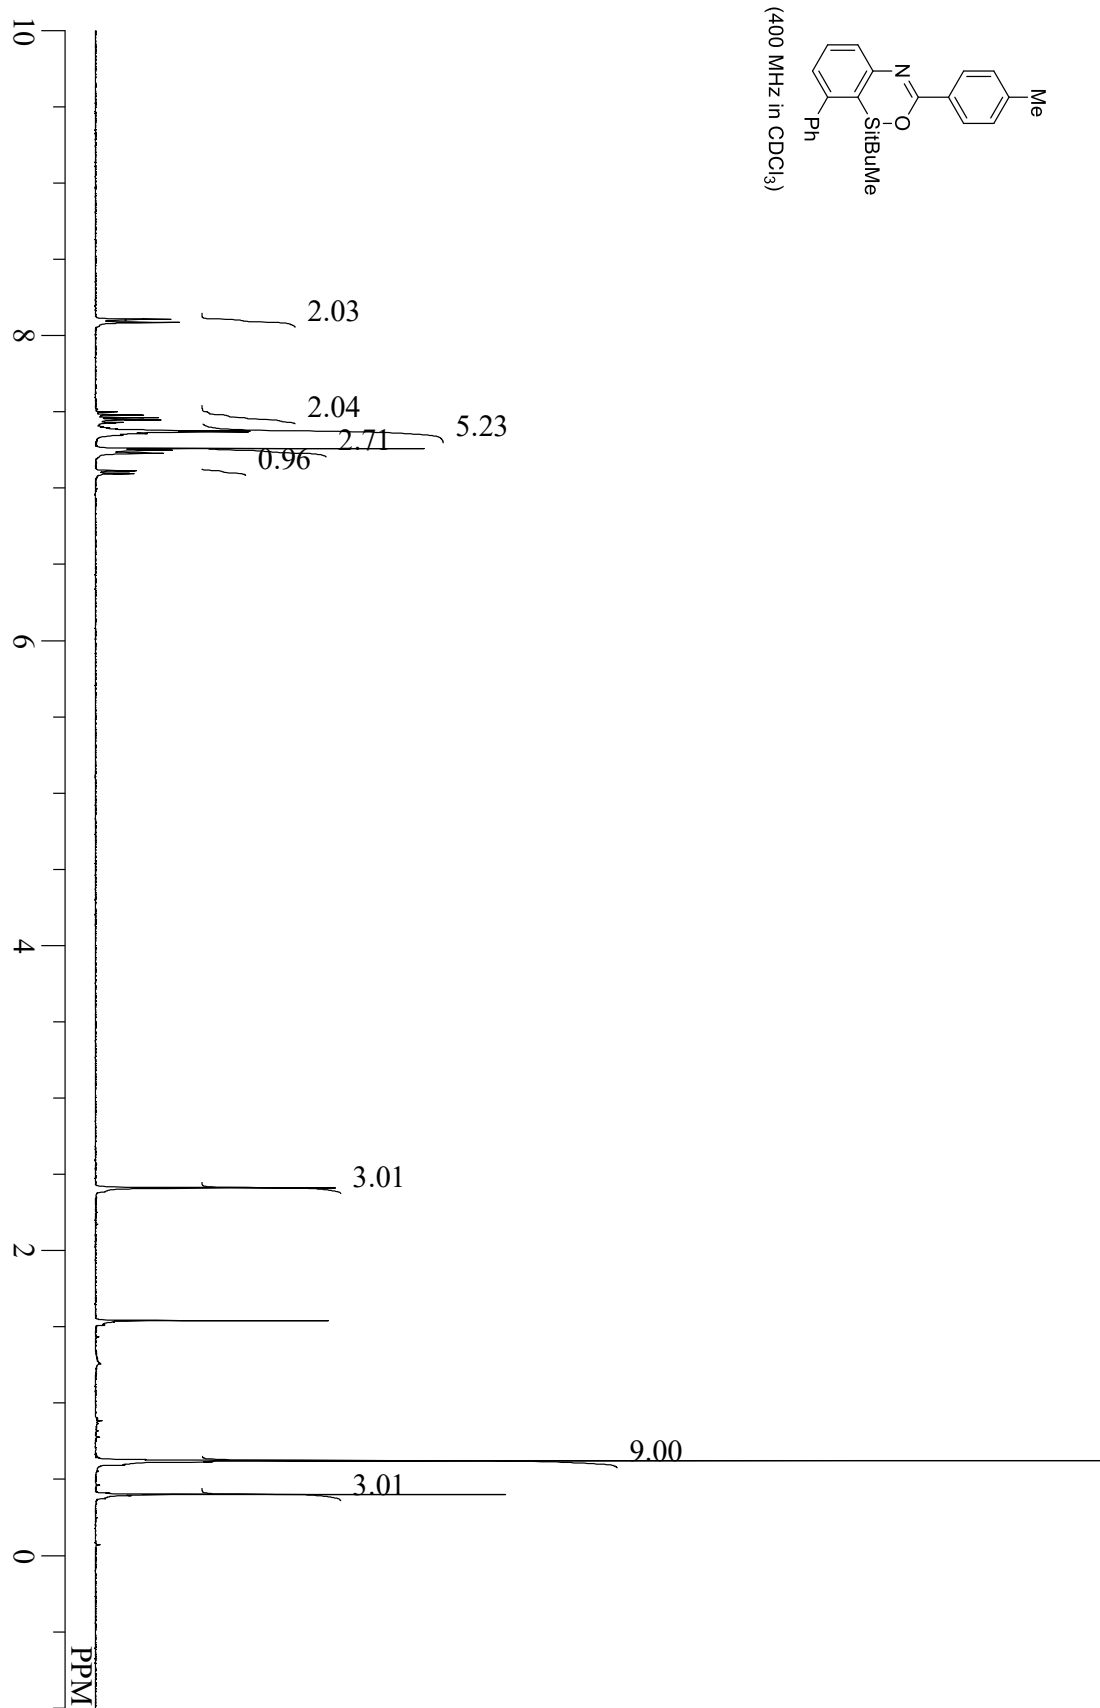

compound **3gg**

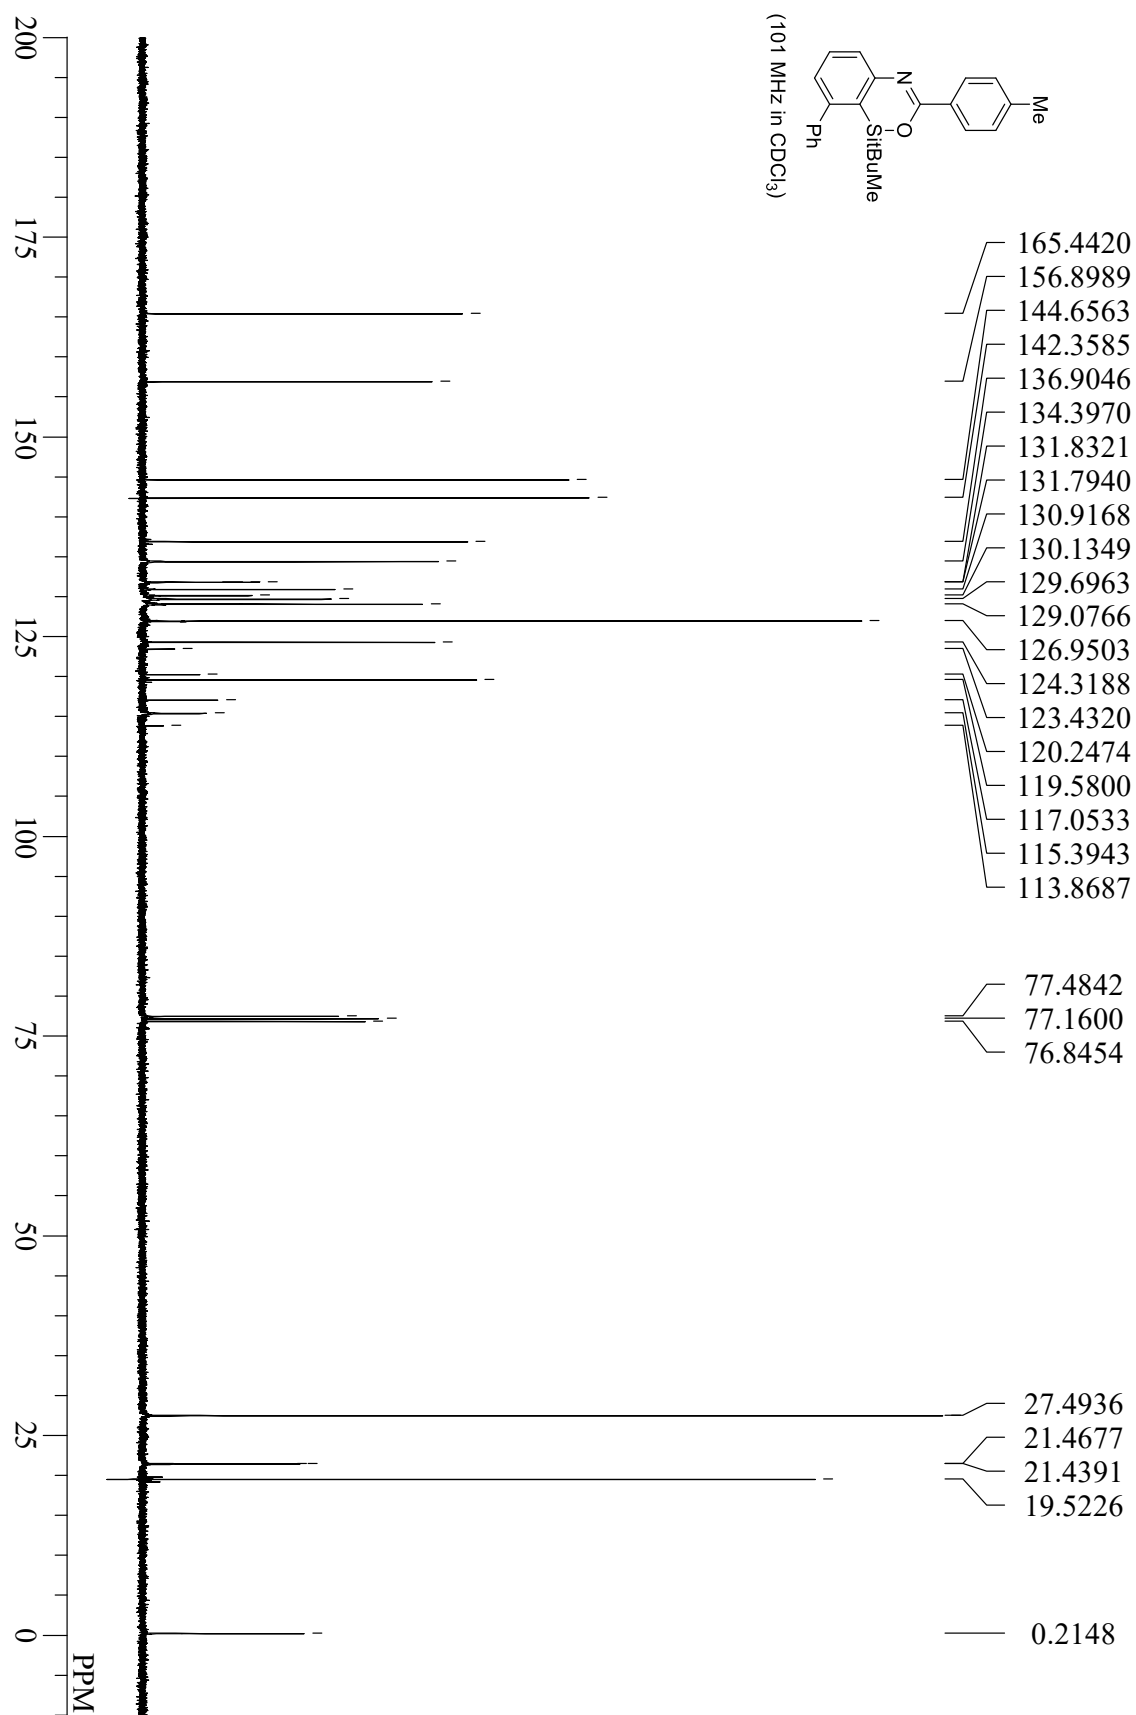



compound **3hh**

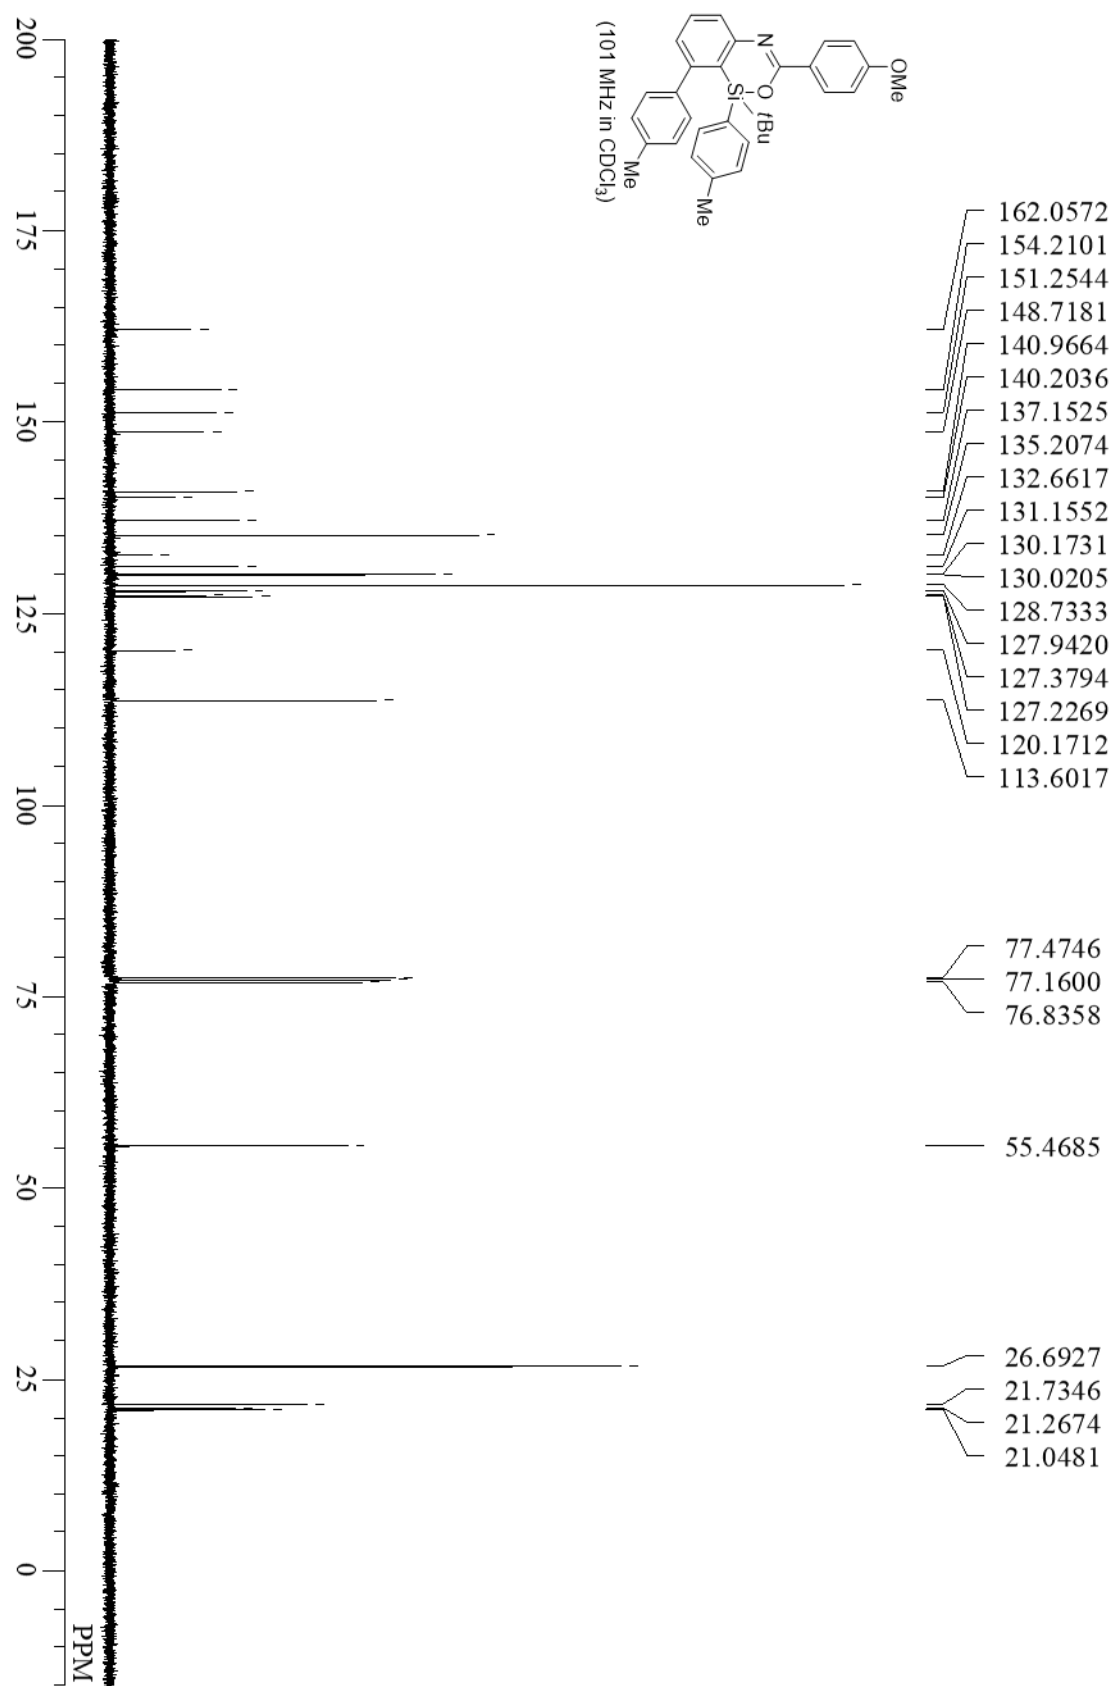

compound **3ii**

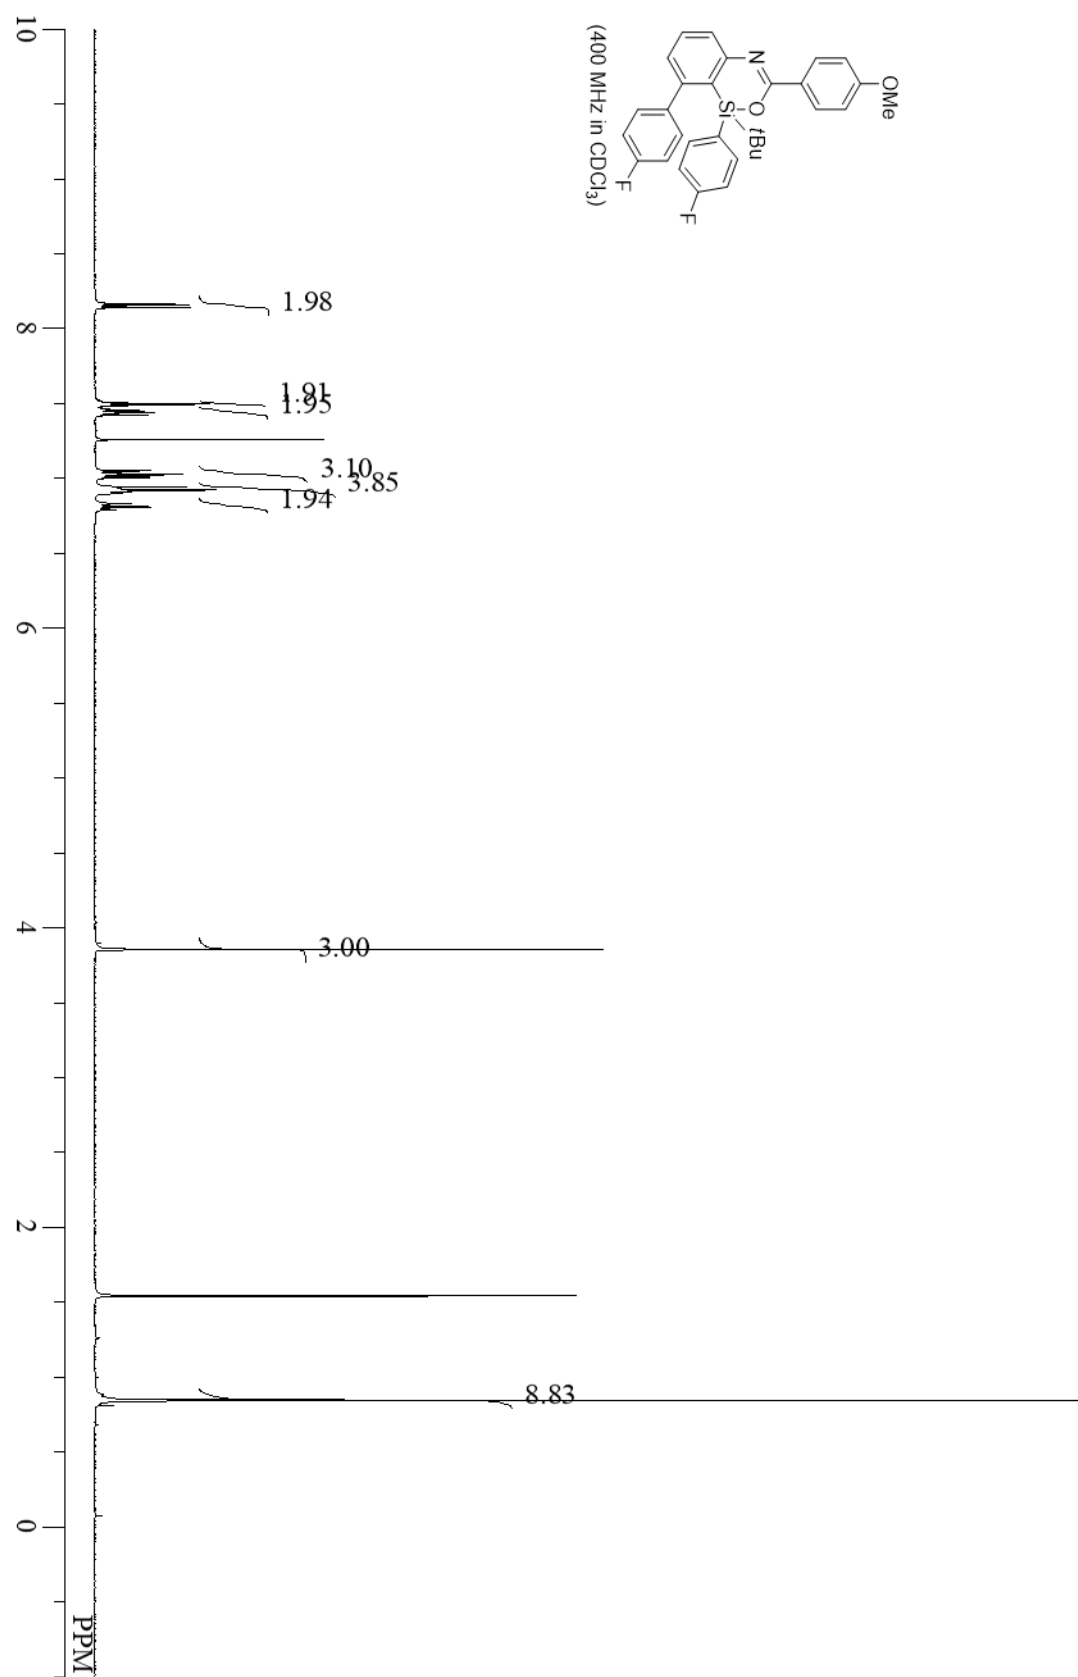

compound **3ii**

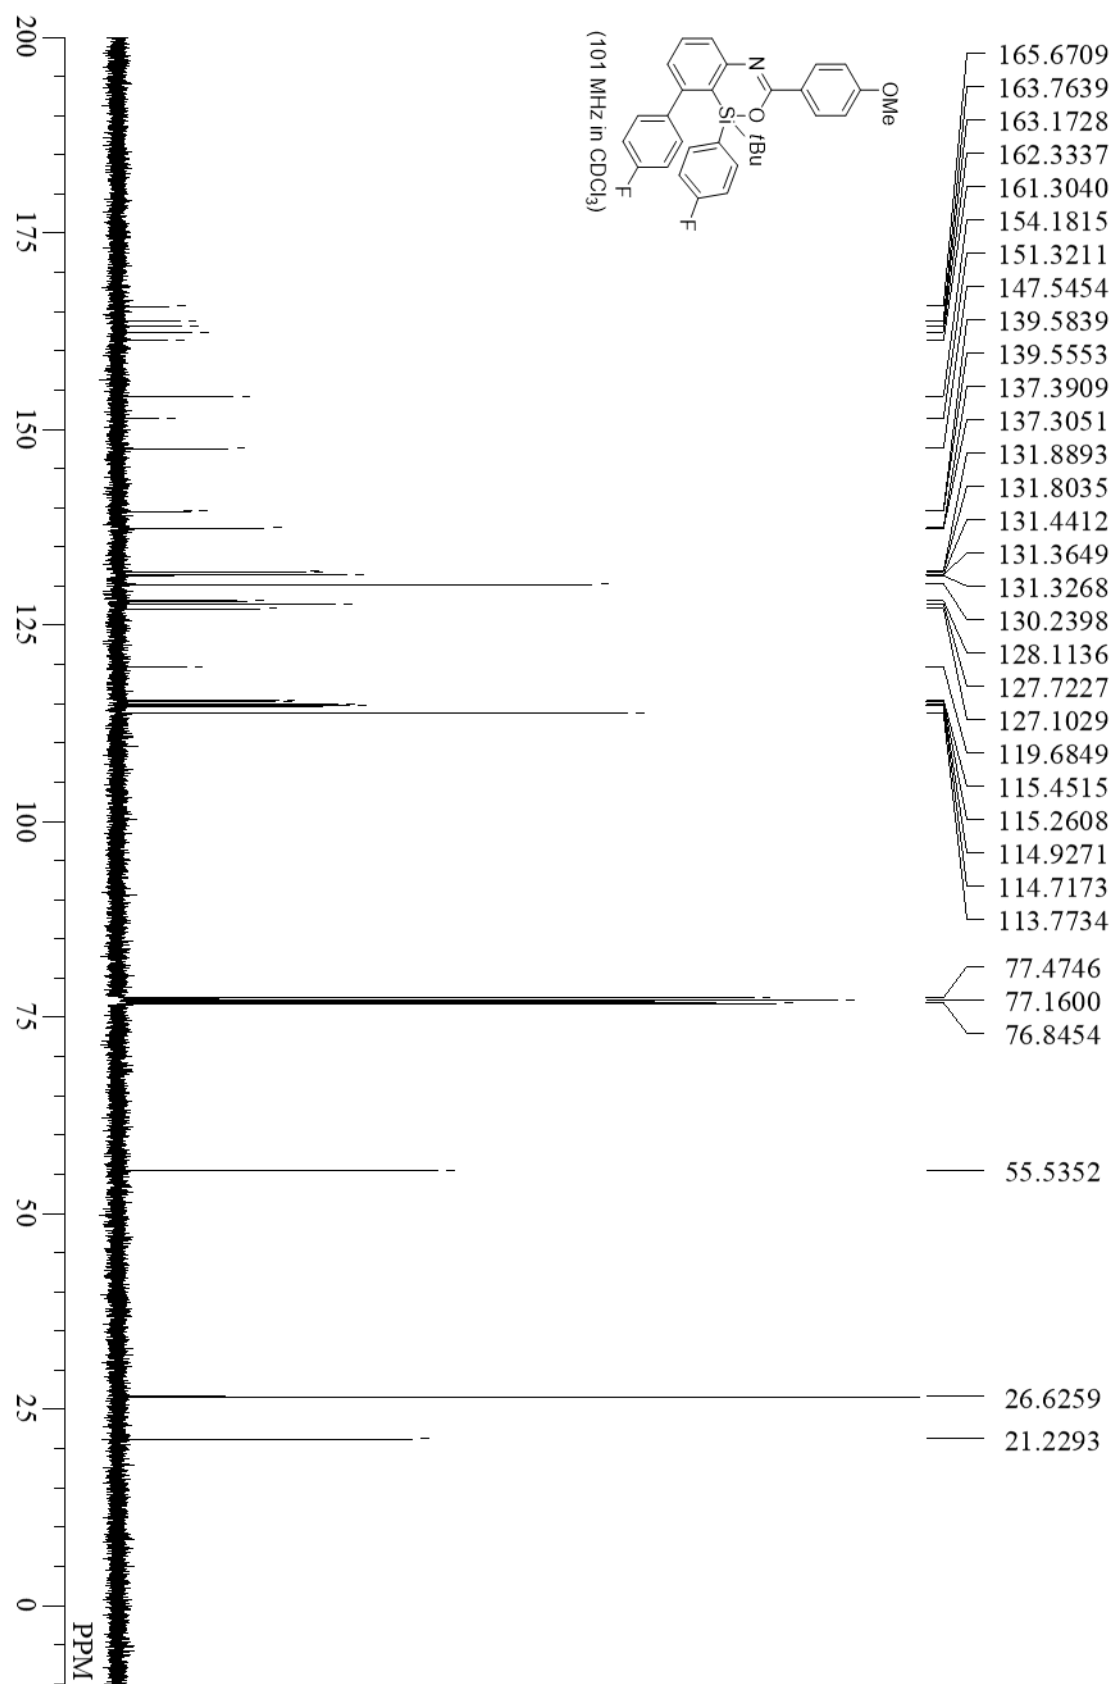



compound **3jj**

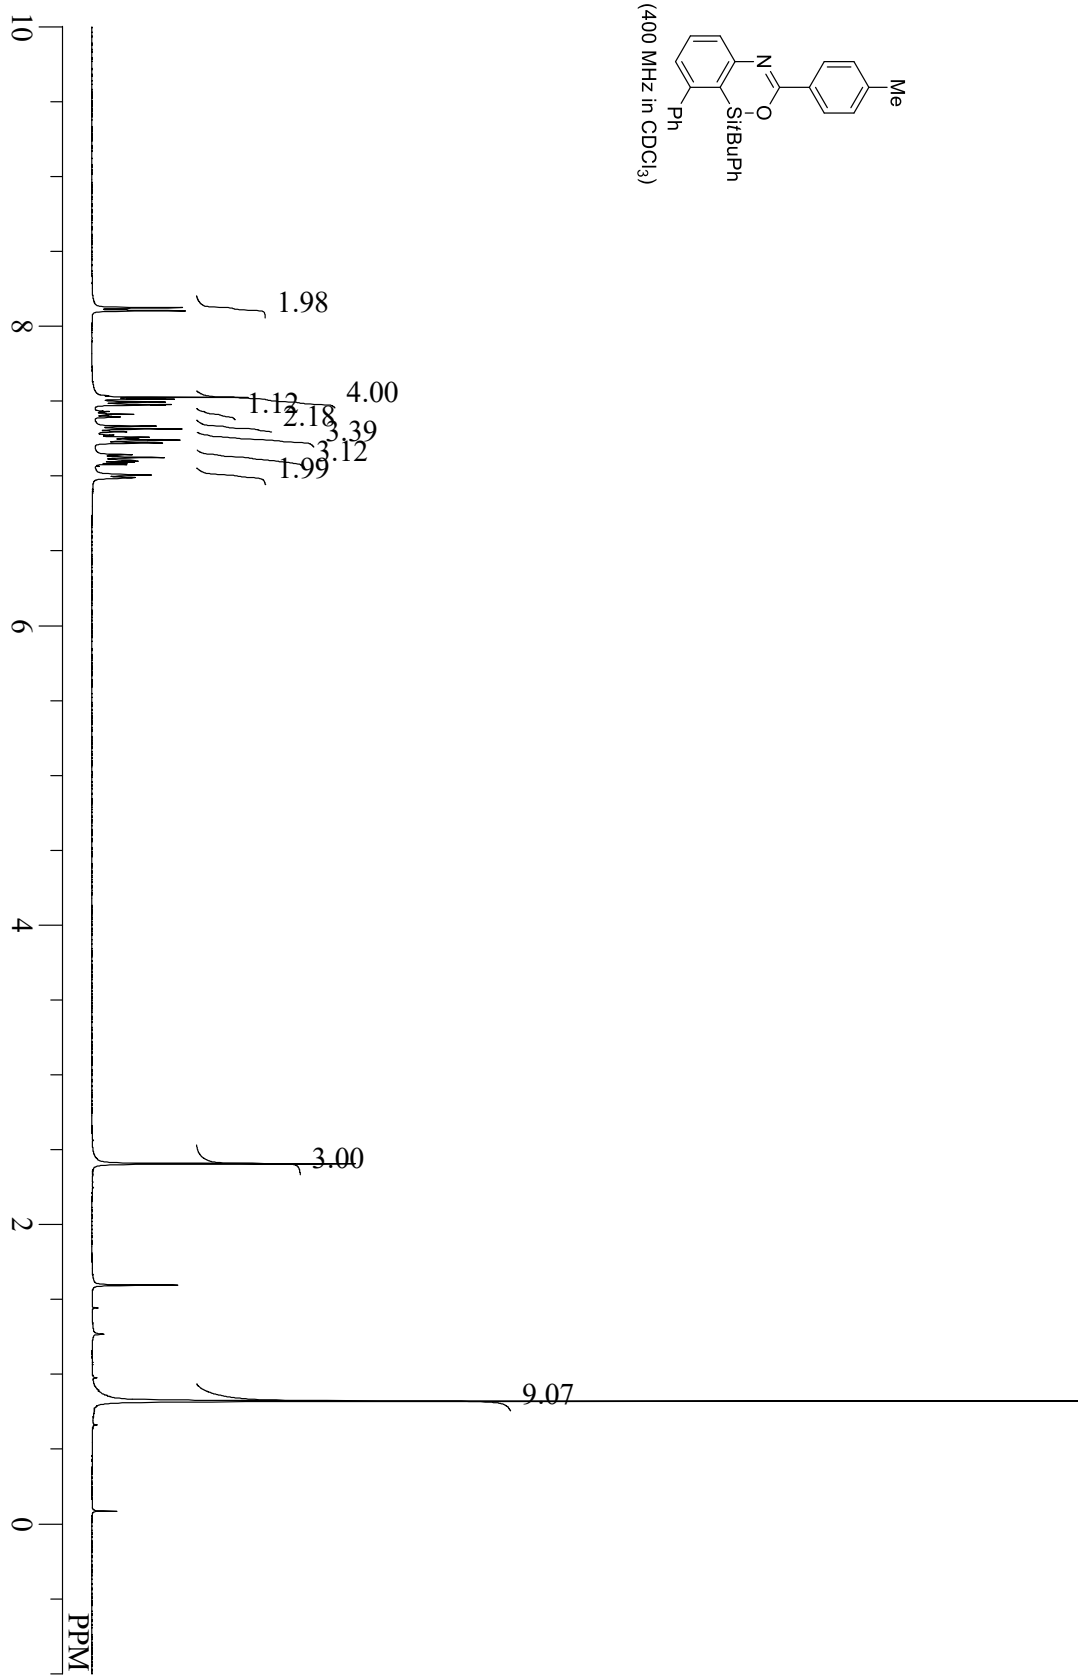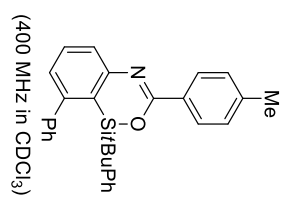

compound 3jj

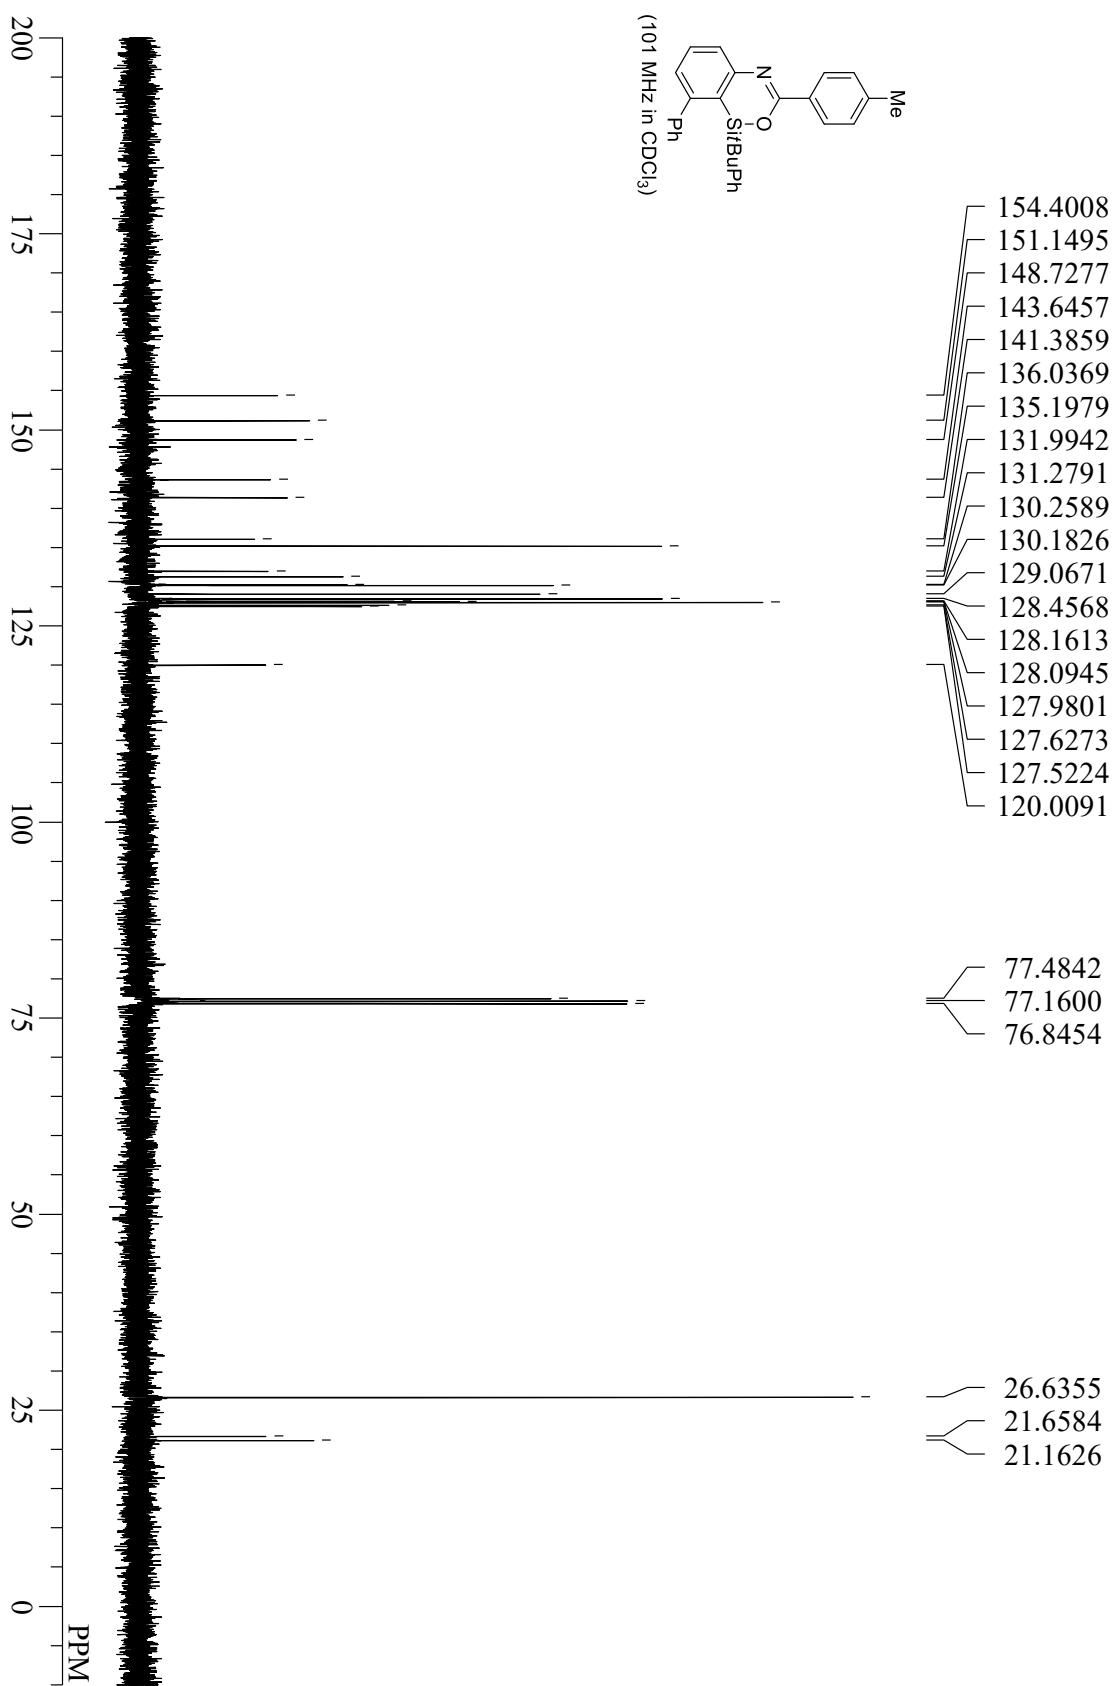

compound **3kk**

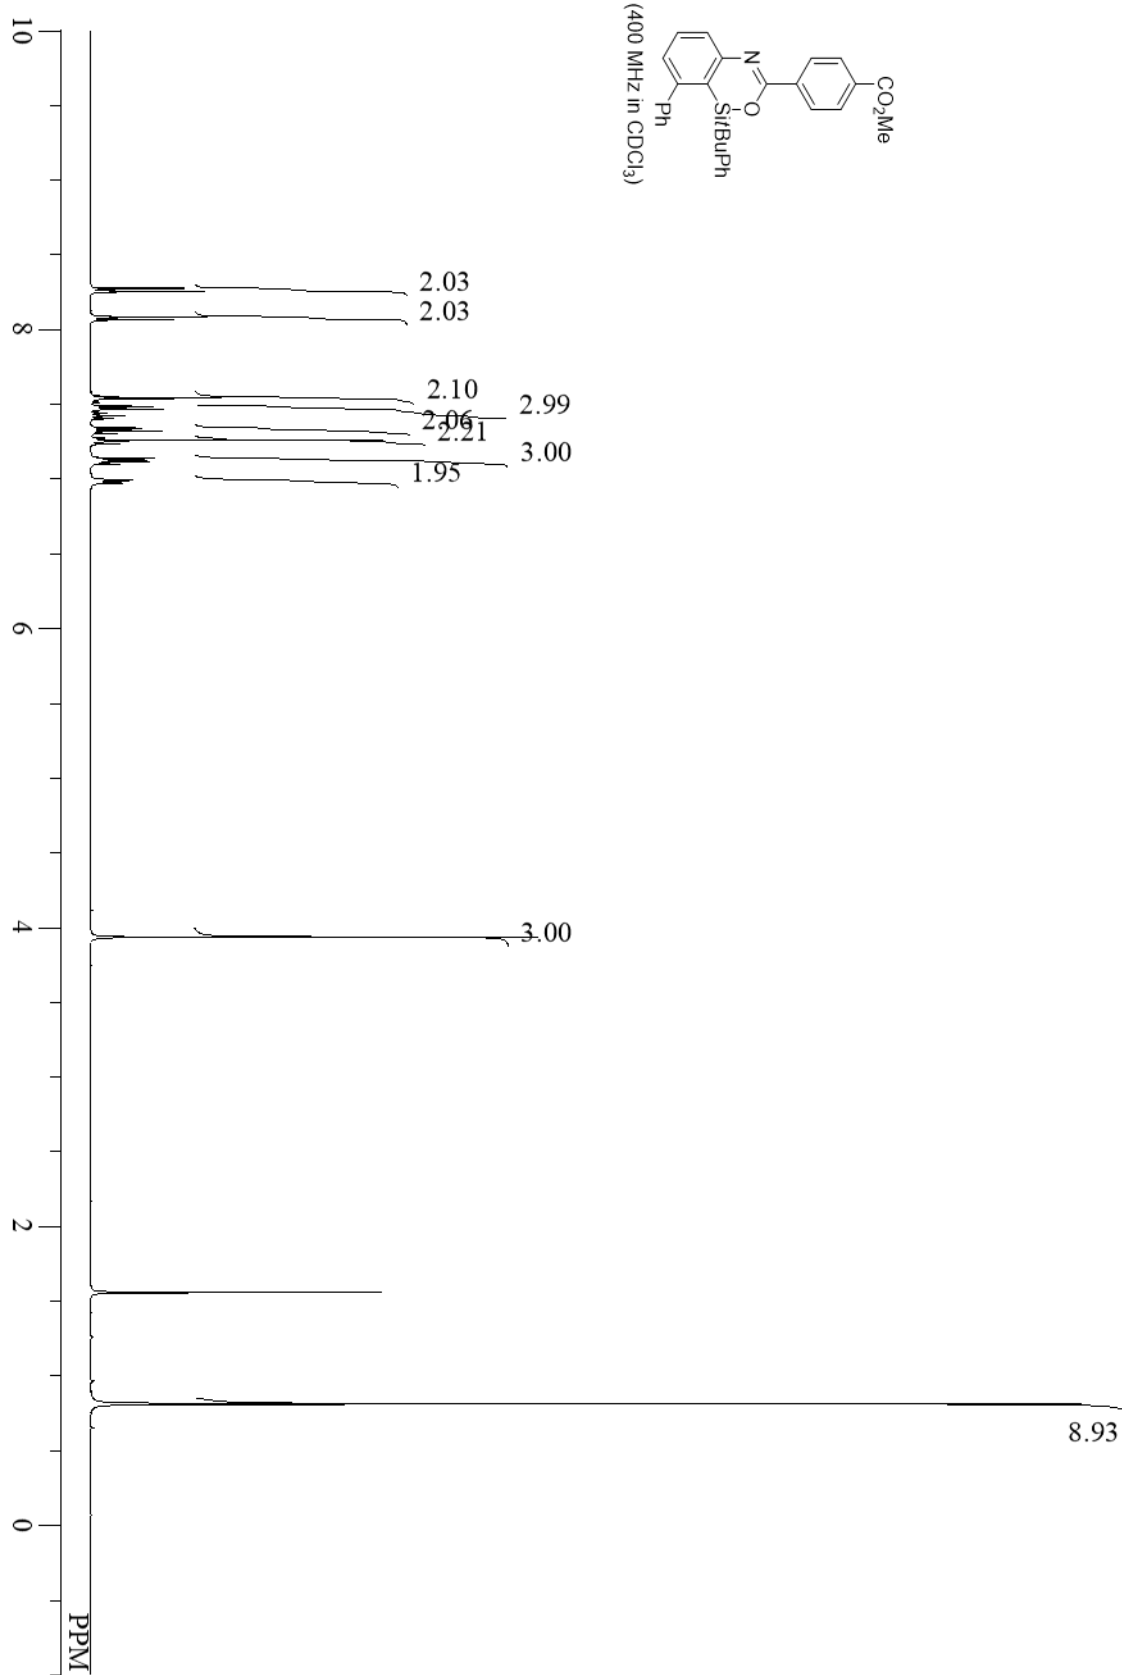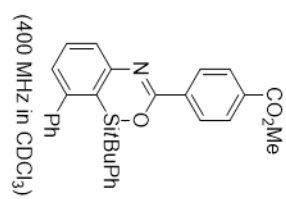

compound **3kk**

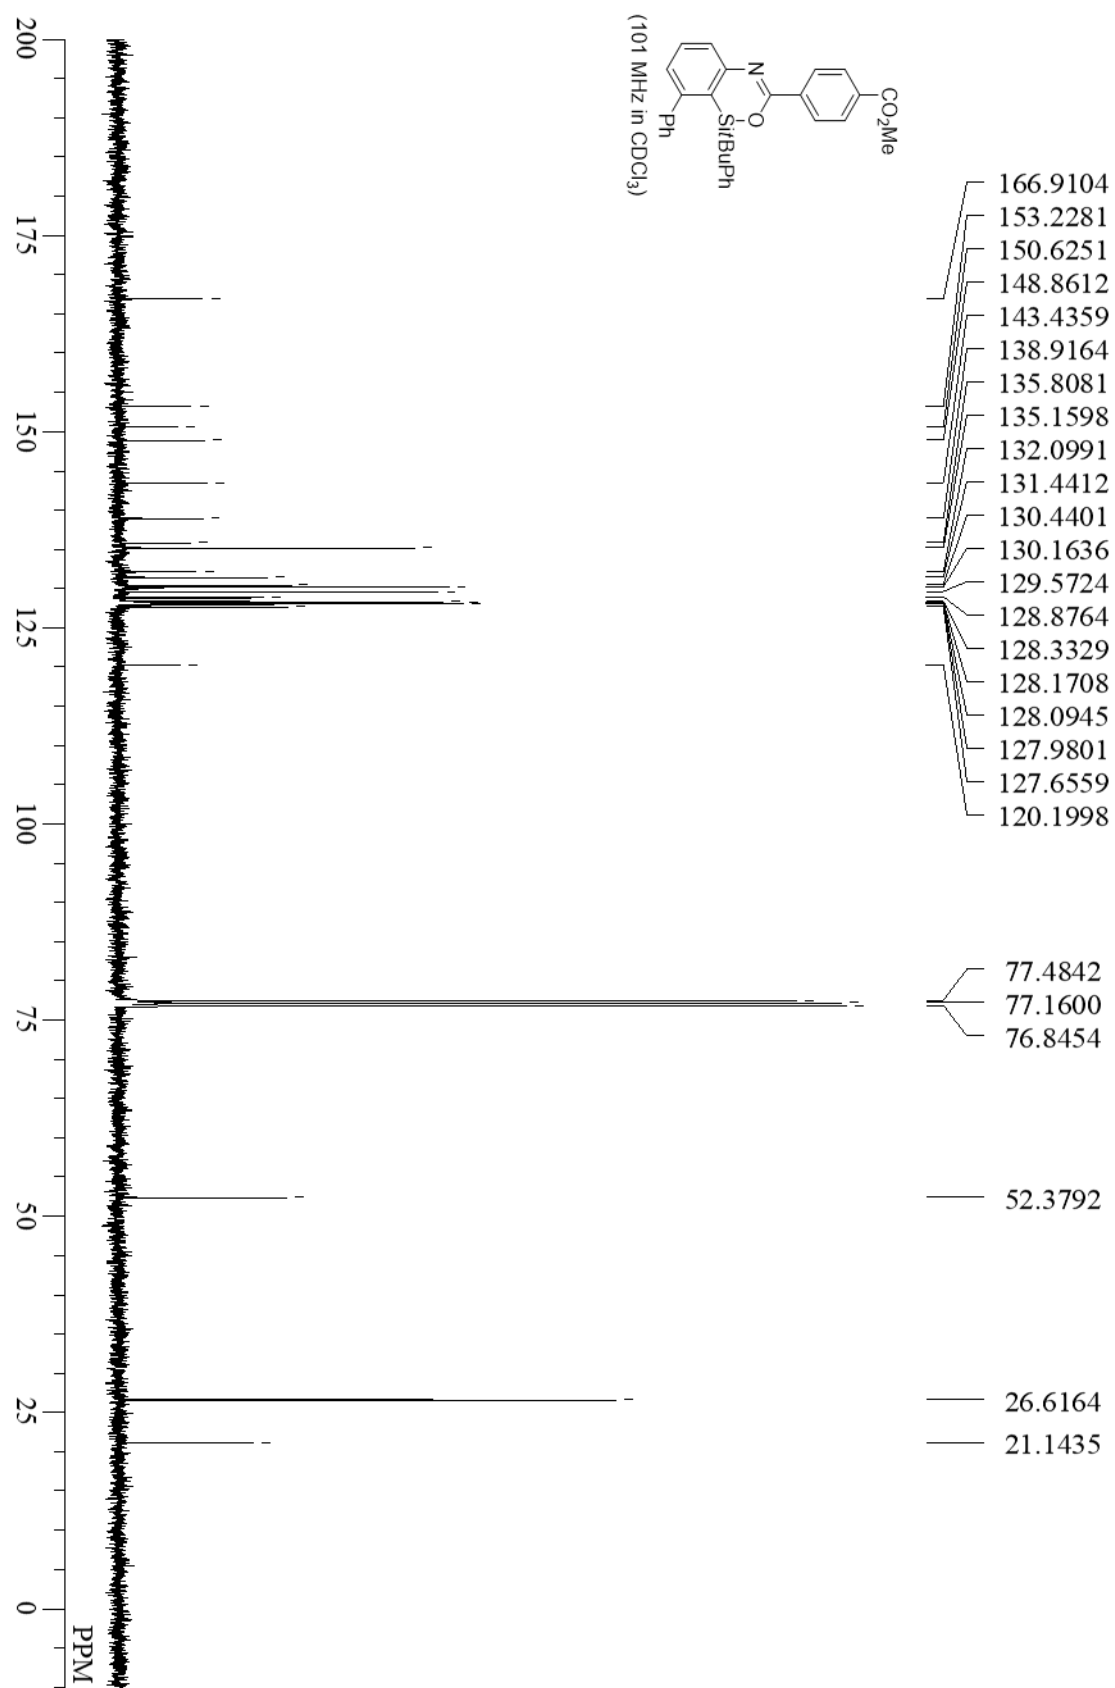

compound **3II**

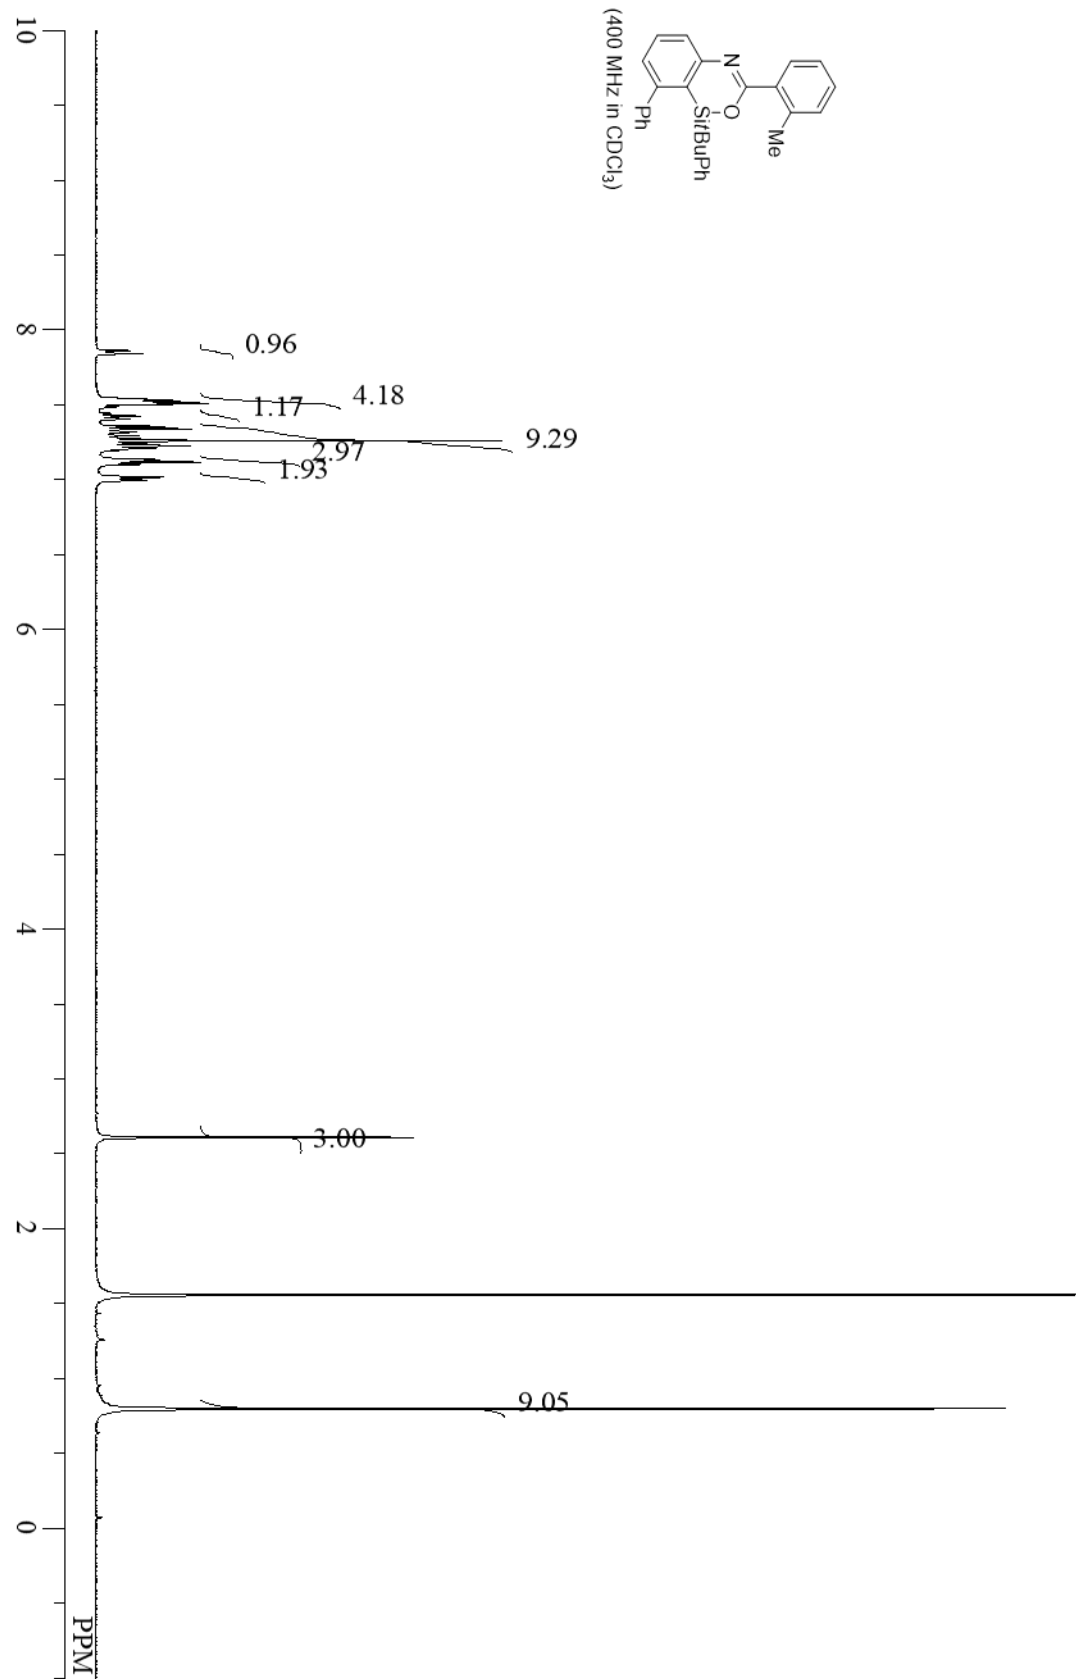

compound 3II

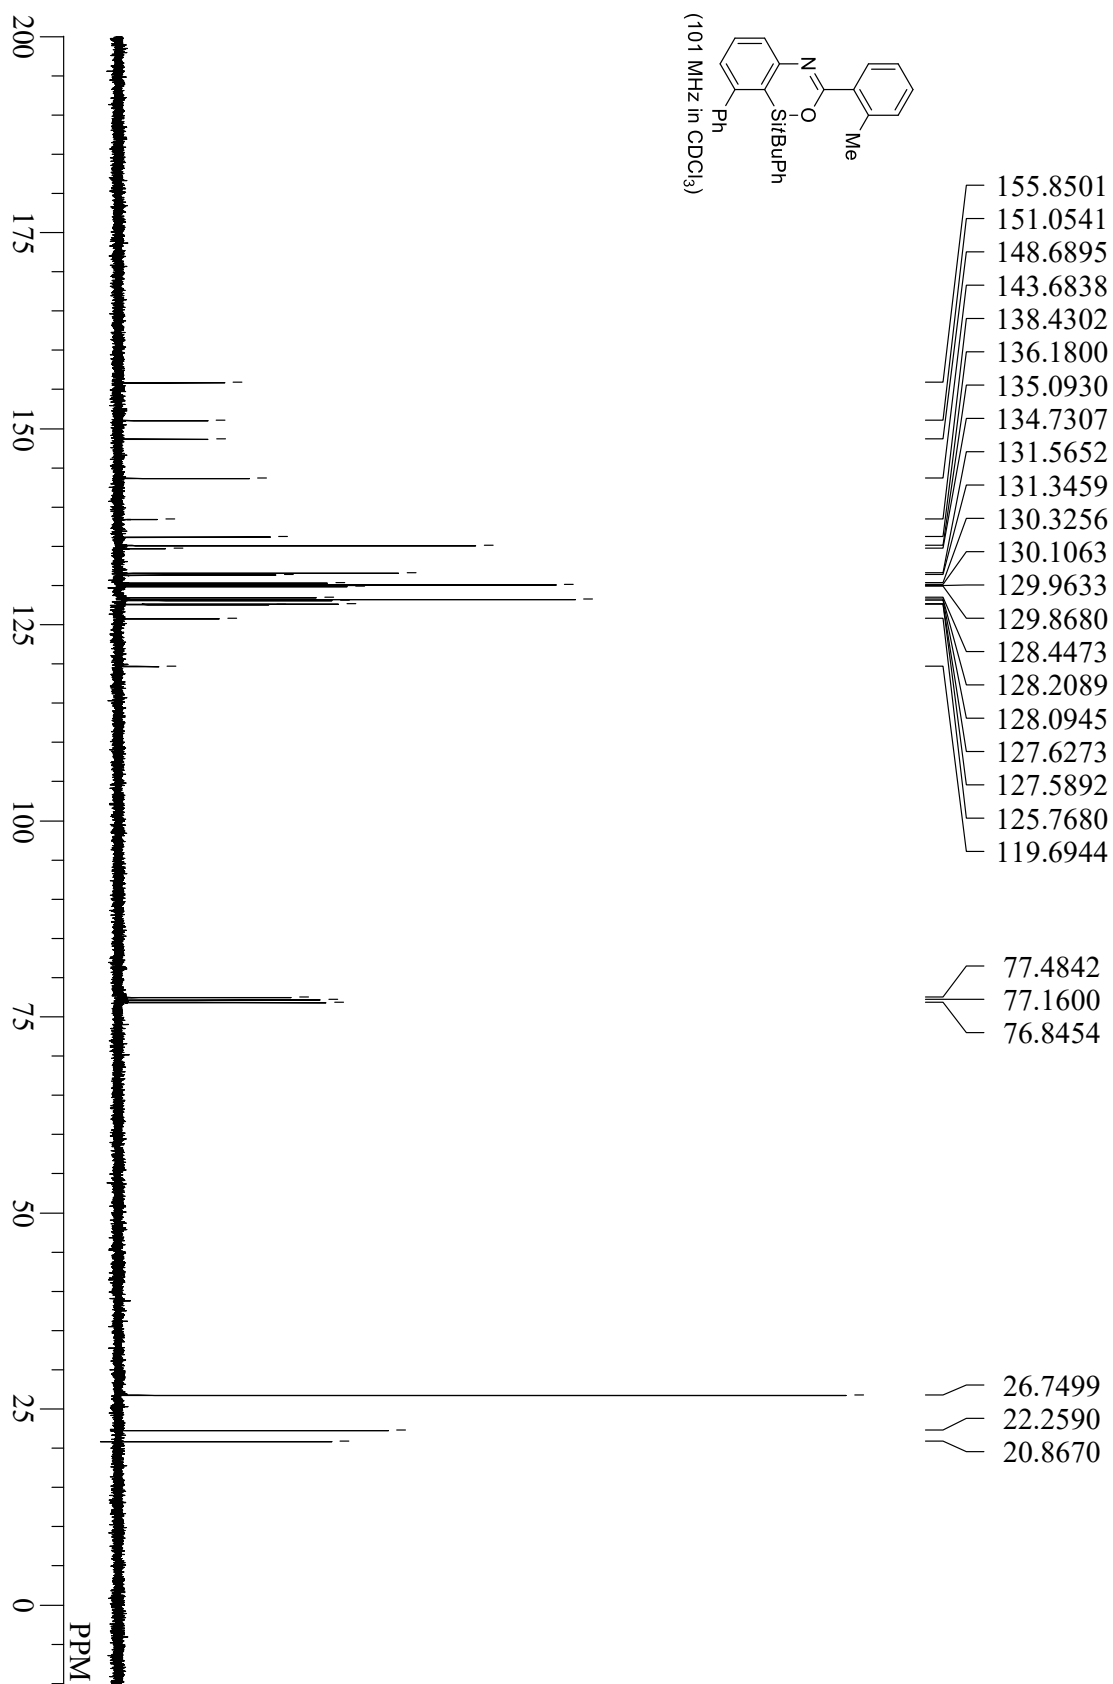

compound 4v

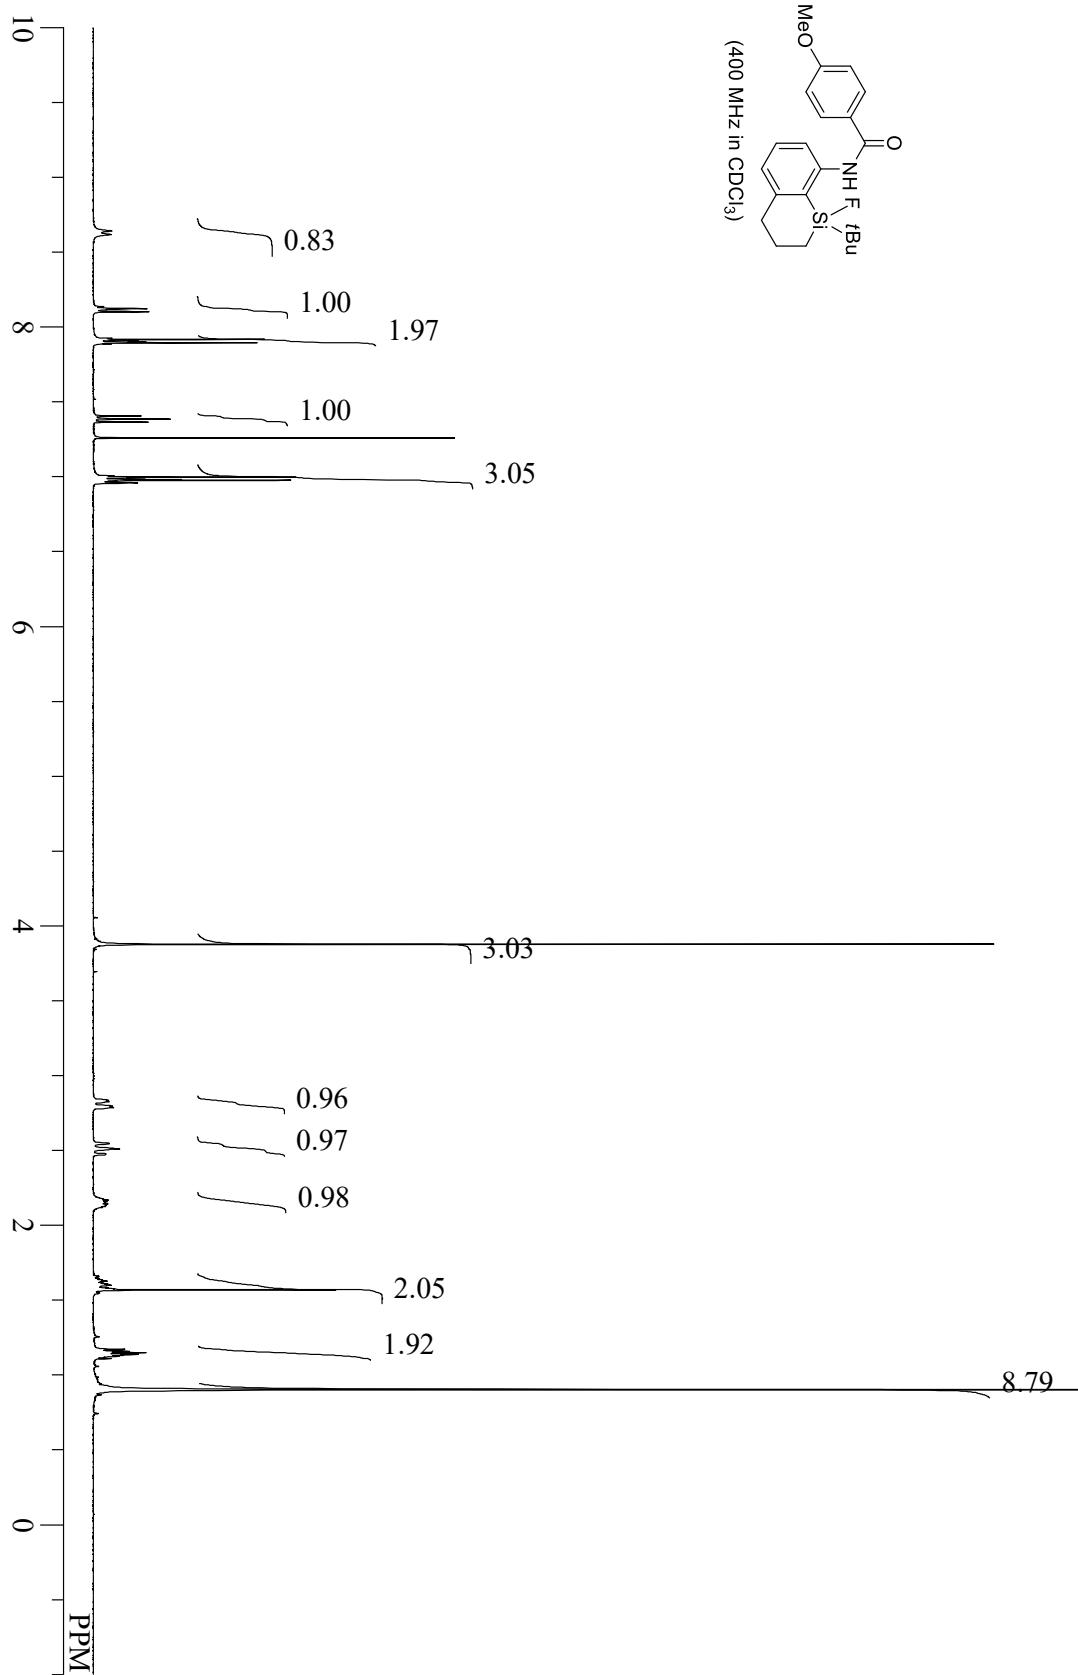

compound 4v

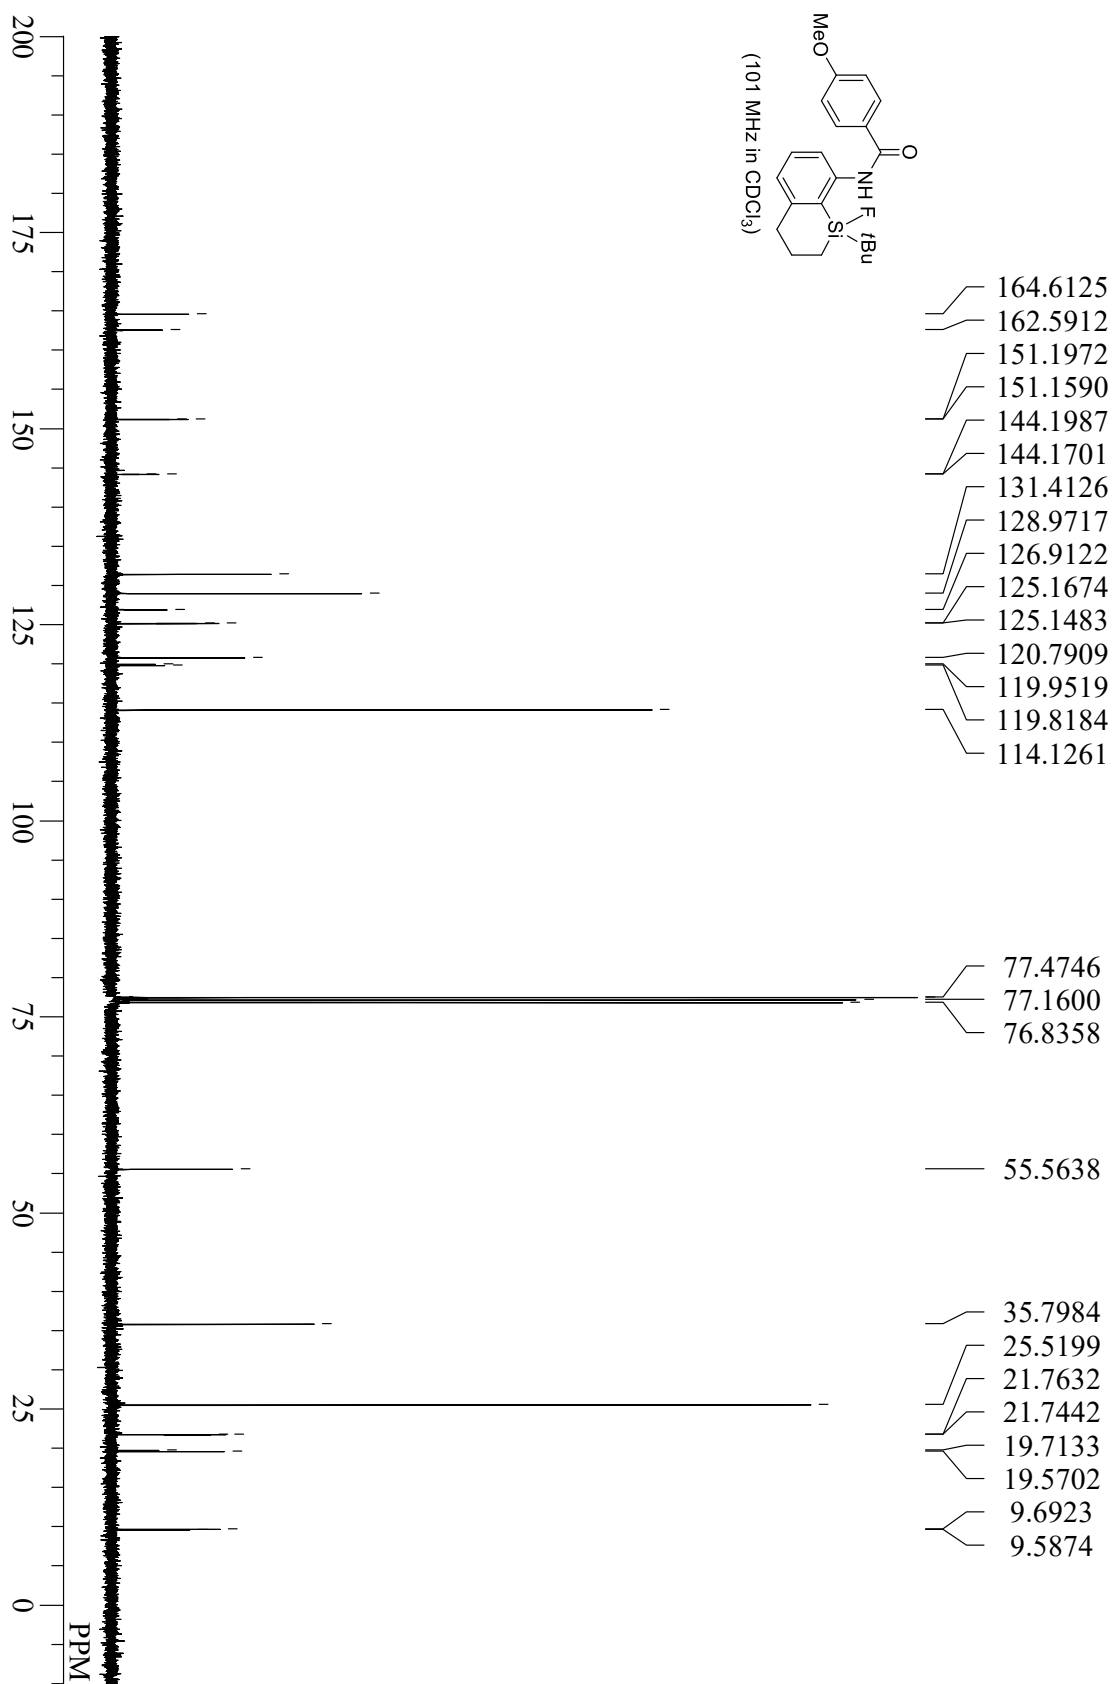



compound **5ff**

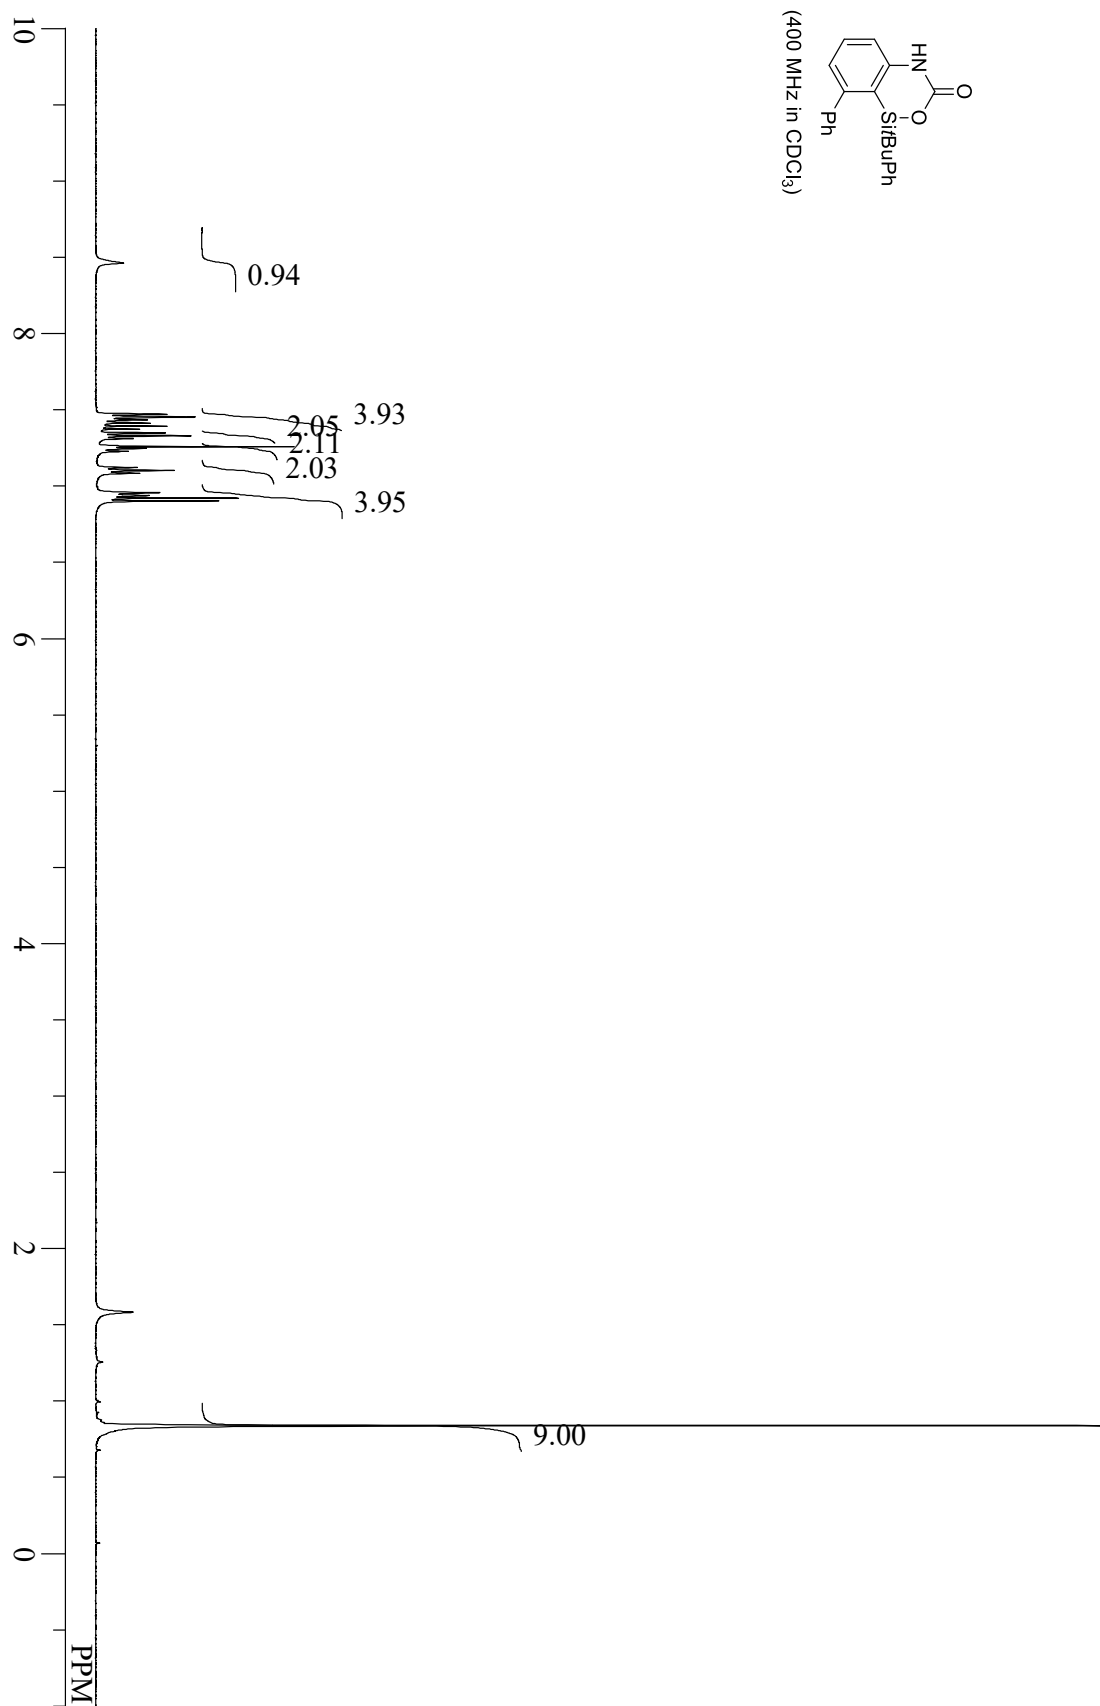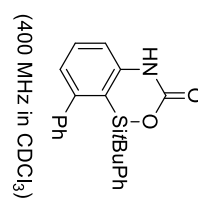

compound 5ff

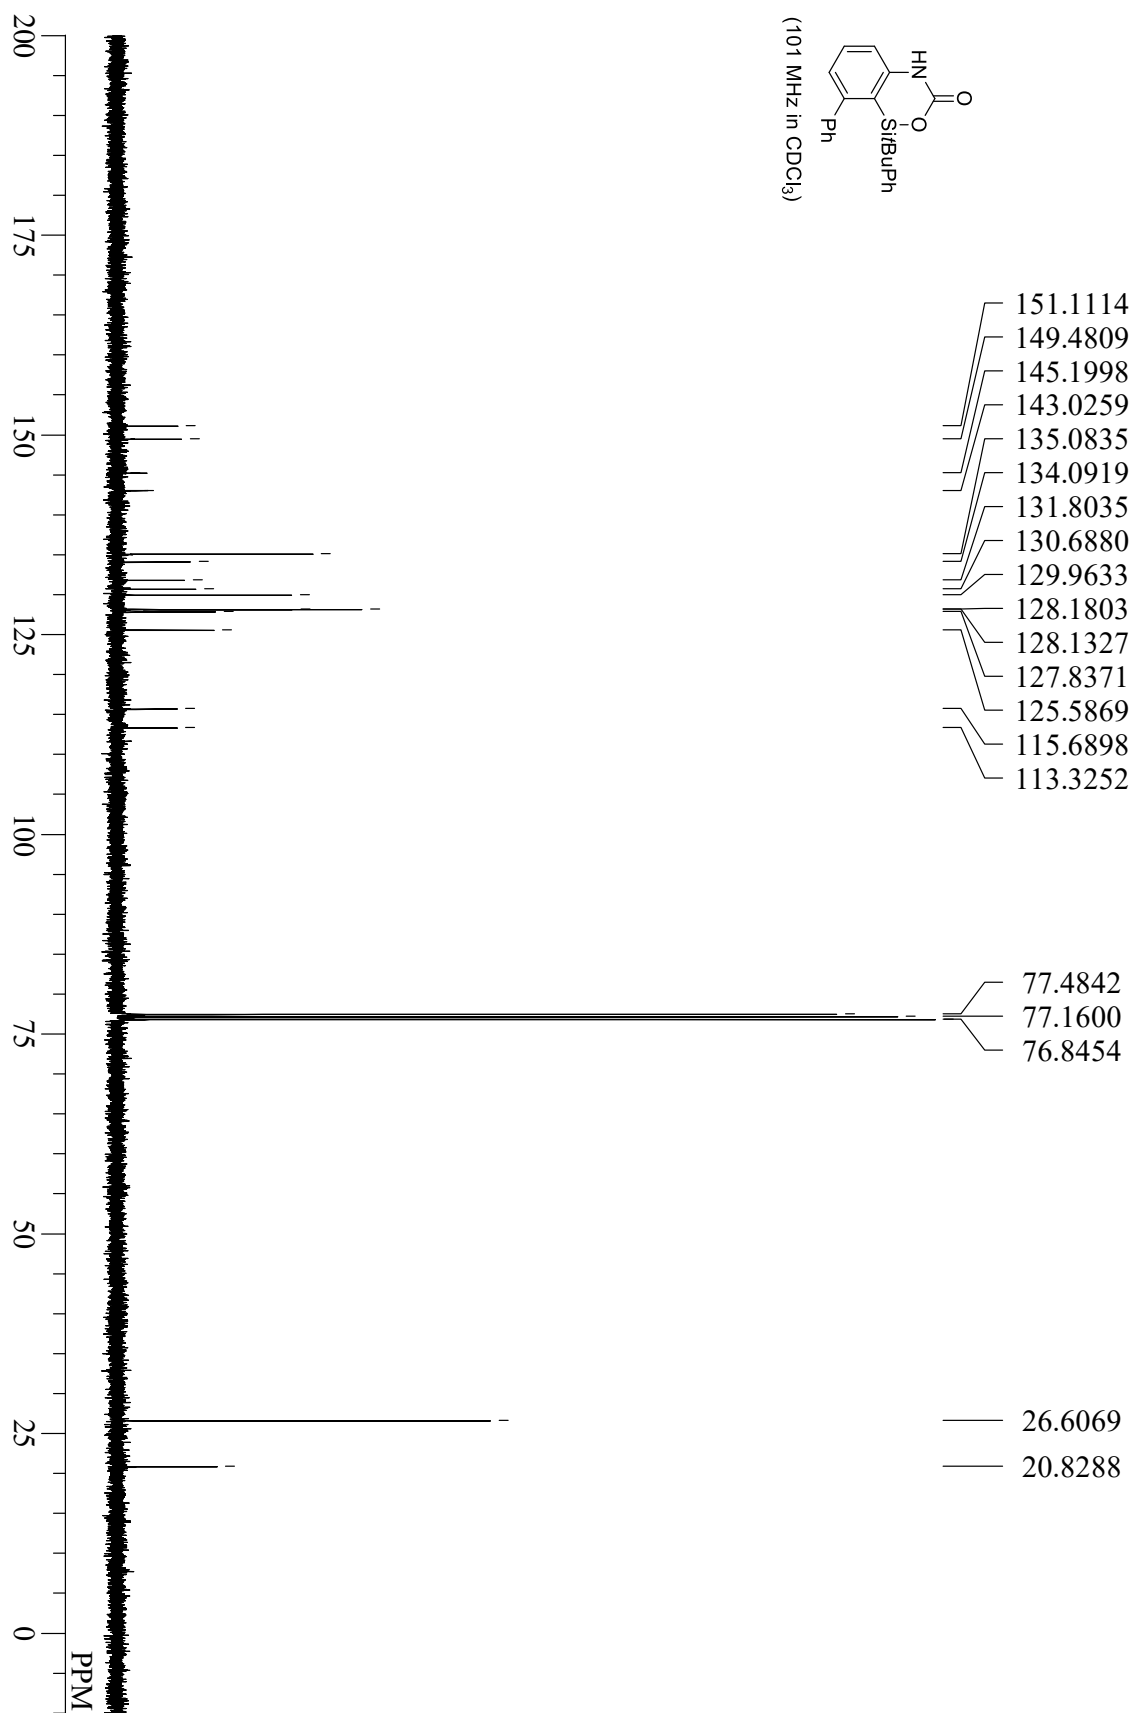

compound 6

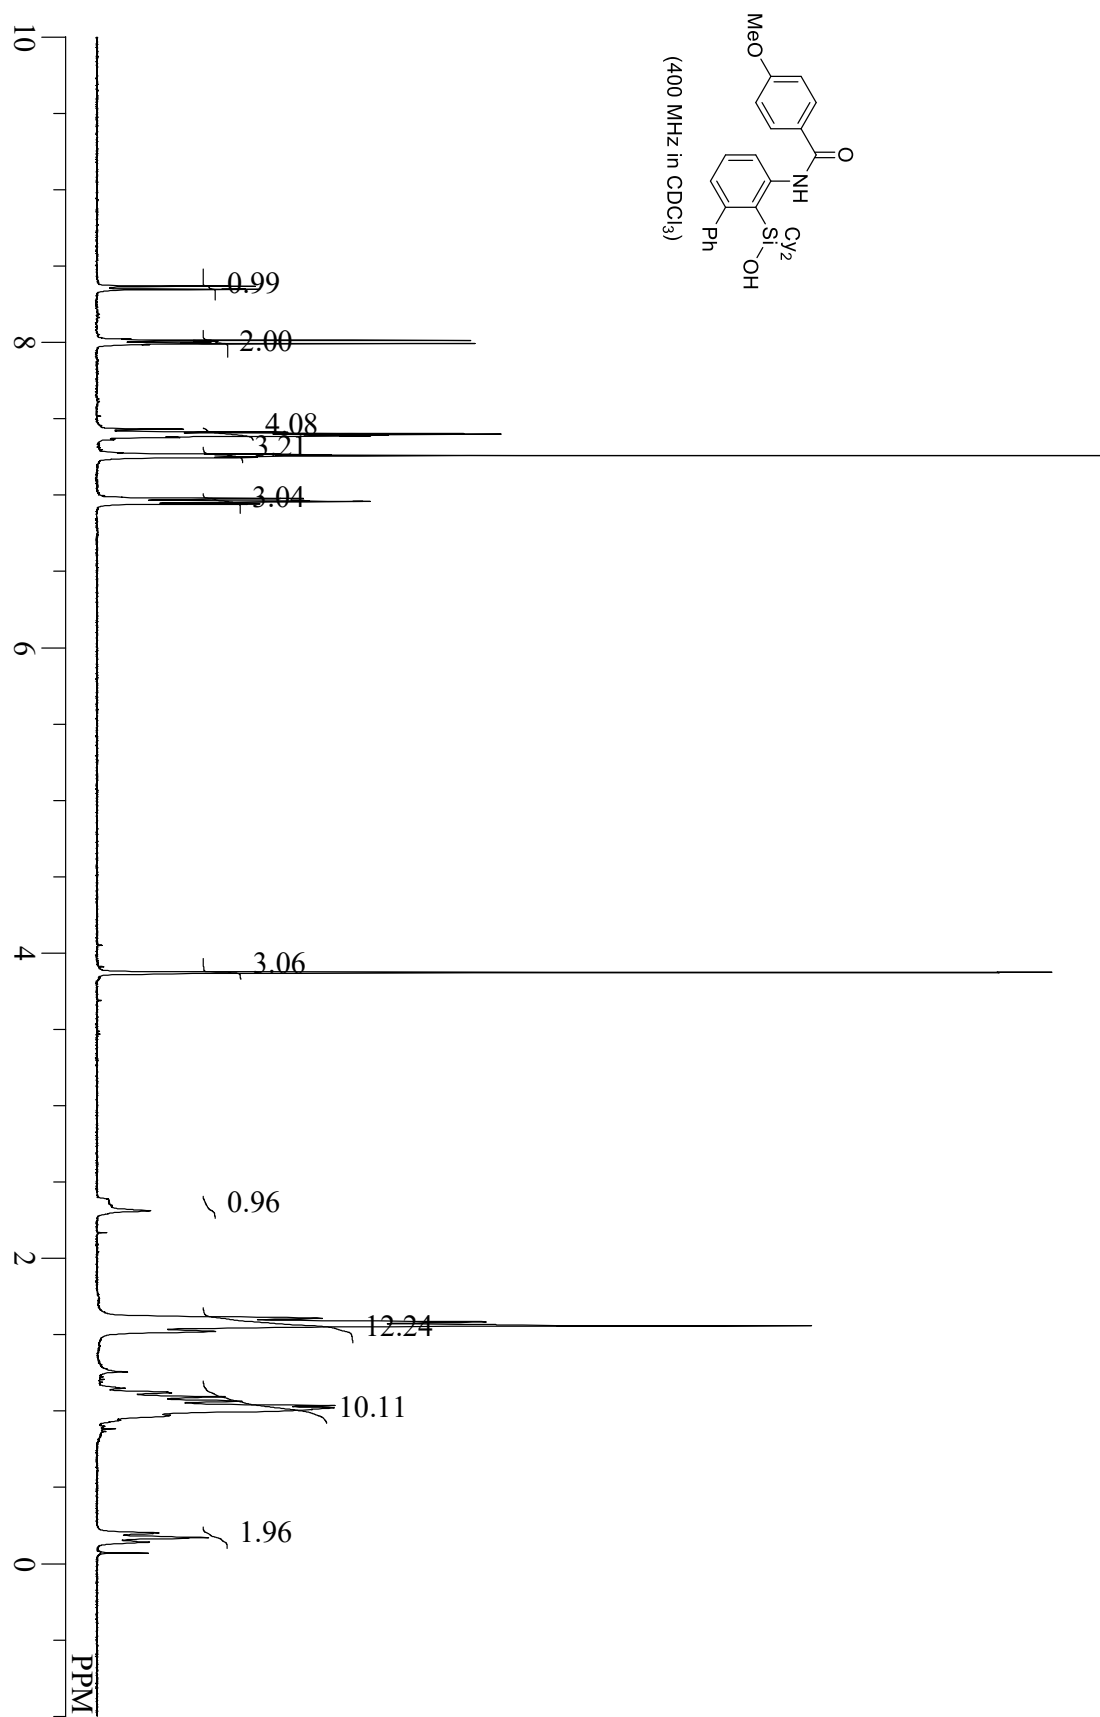

compound 6

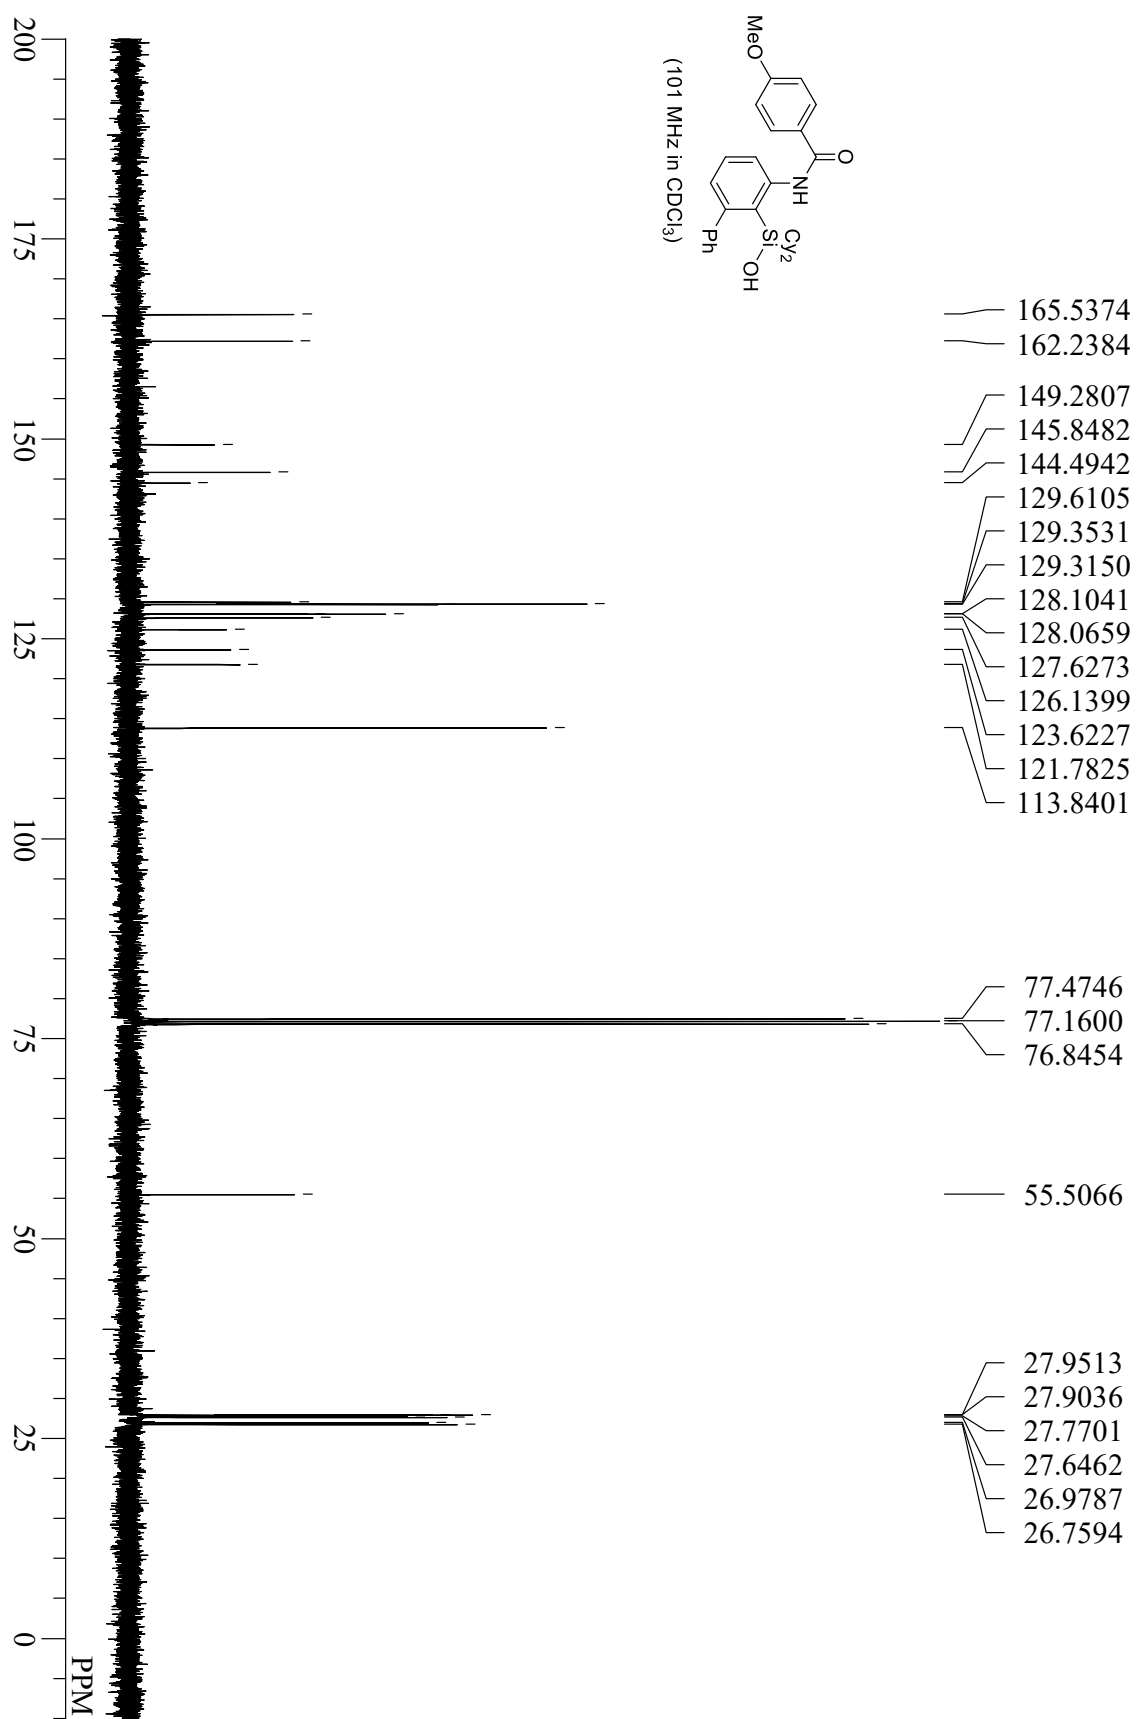

compound 7

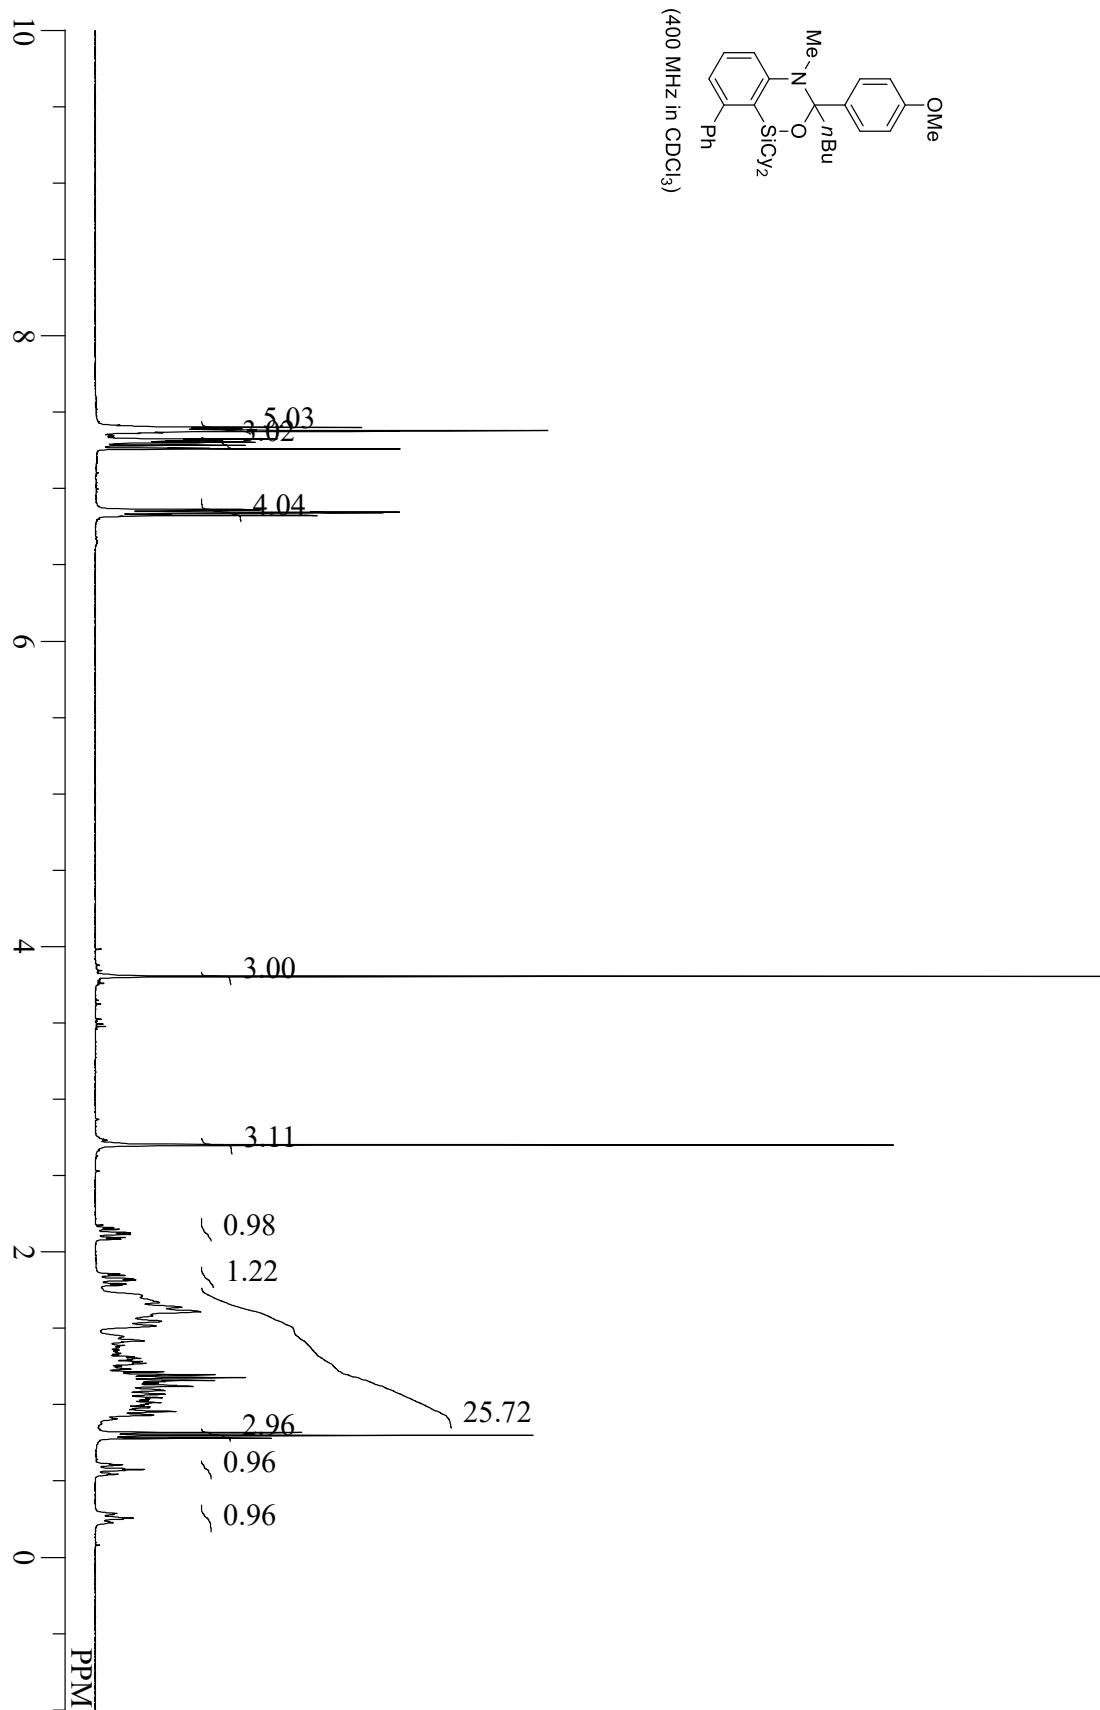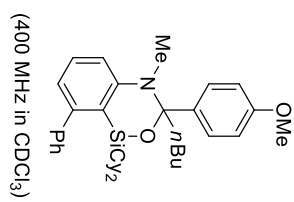

compound 7

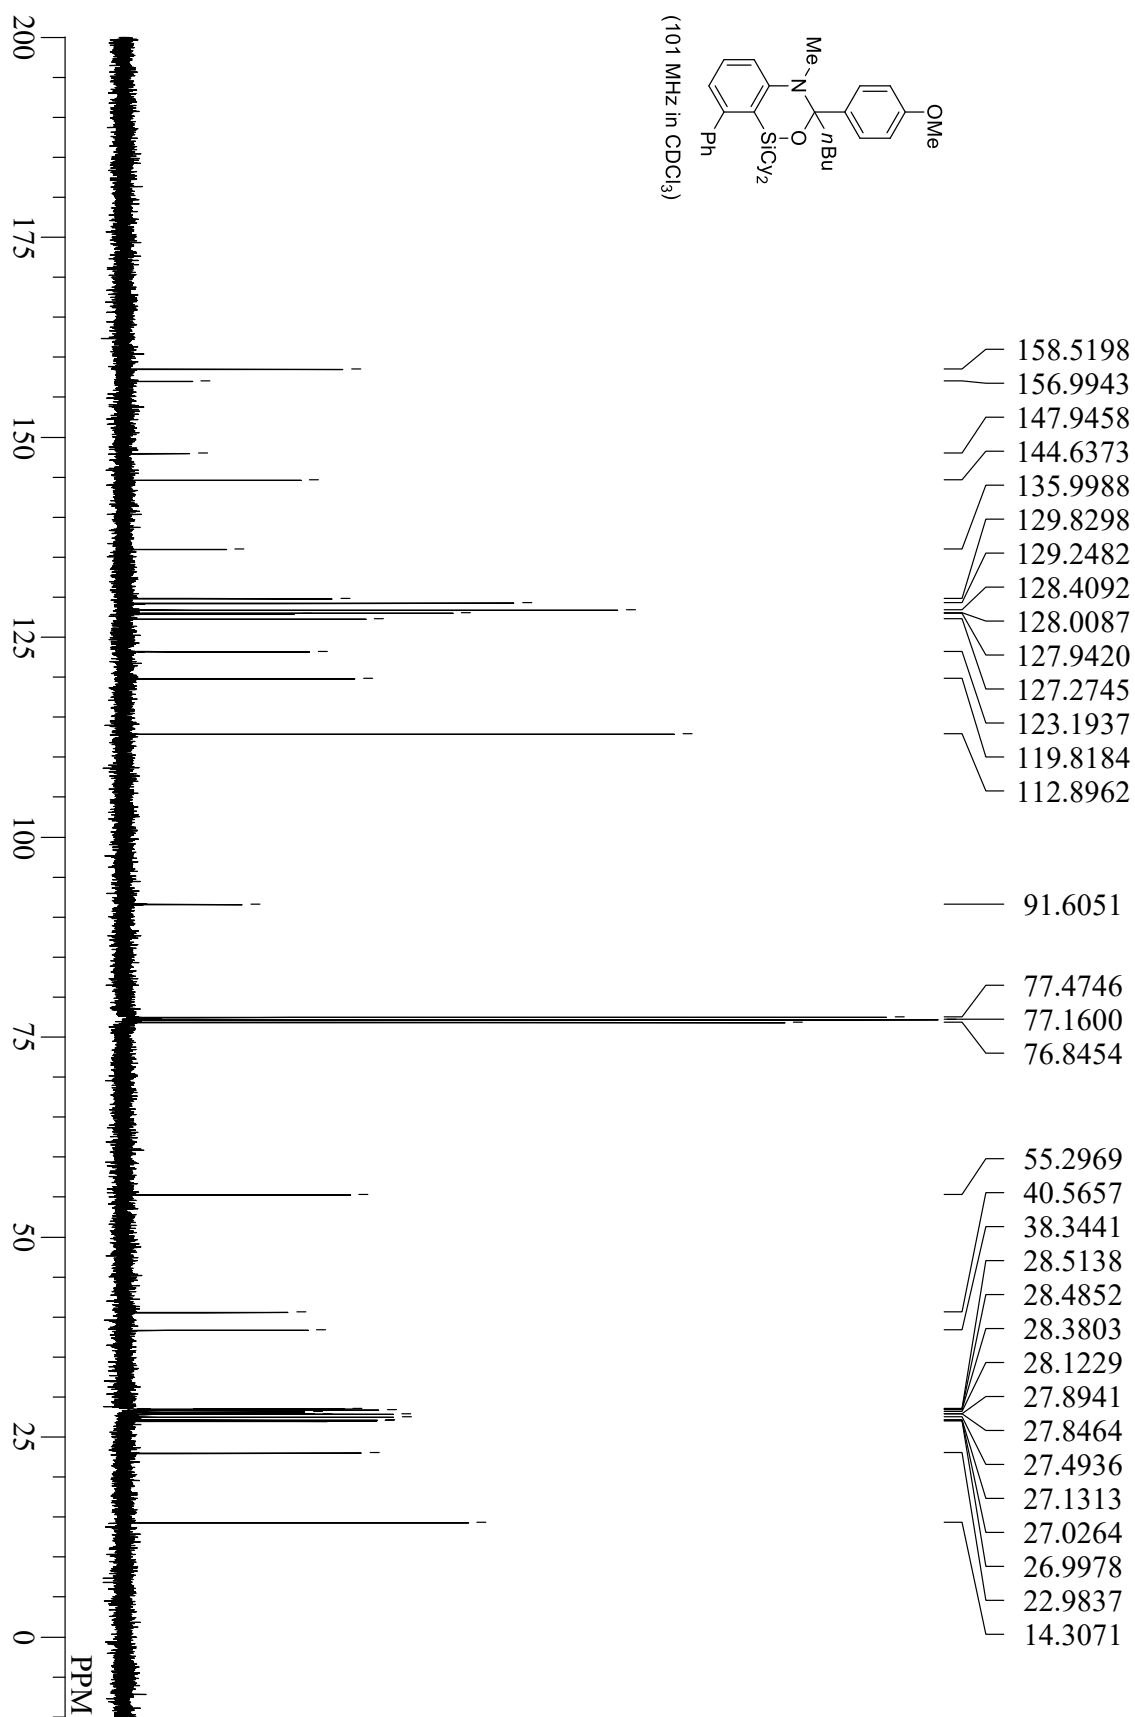

compound 8

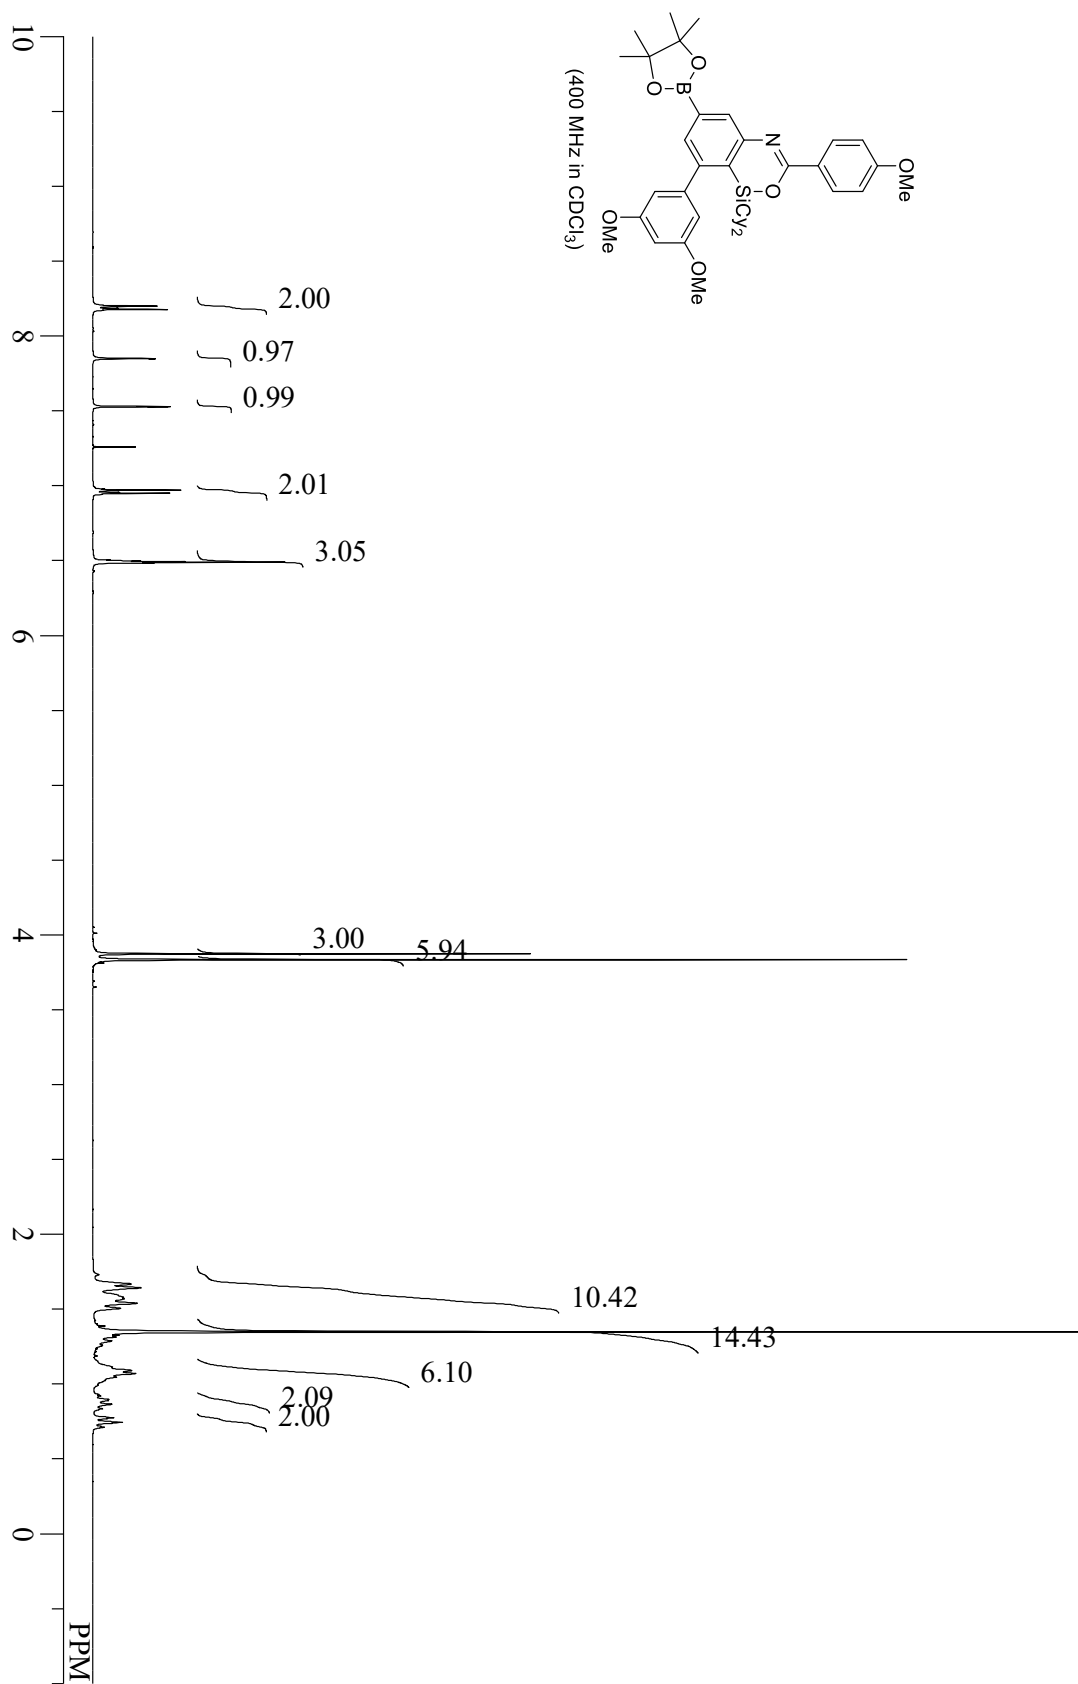

compound 8

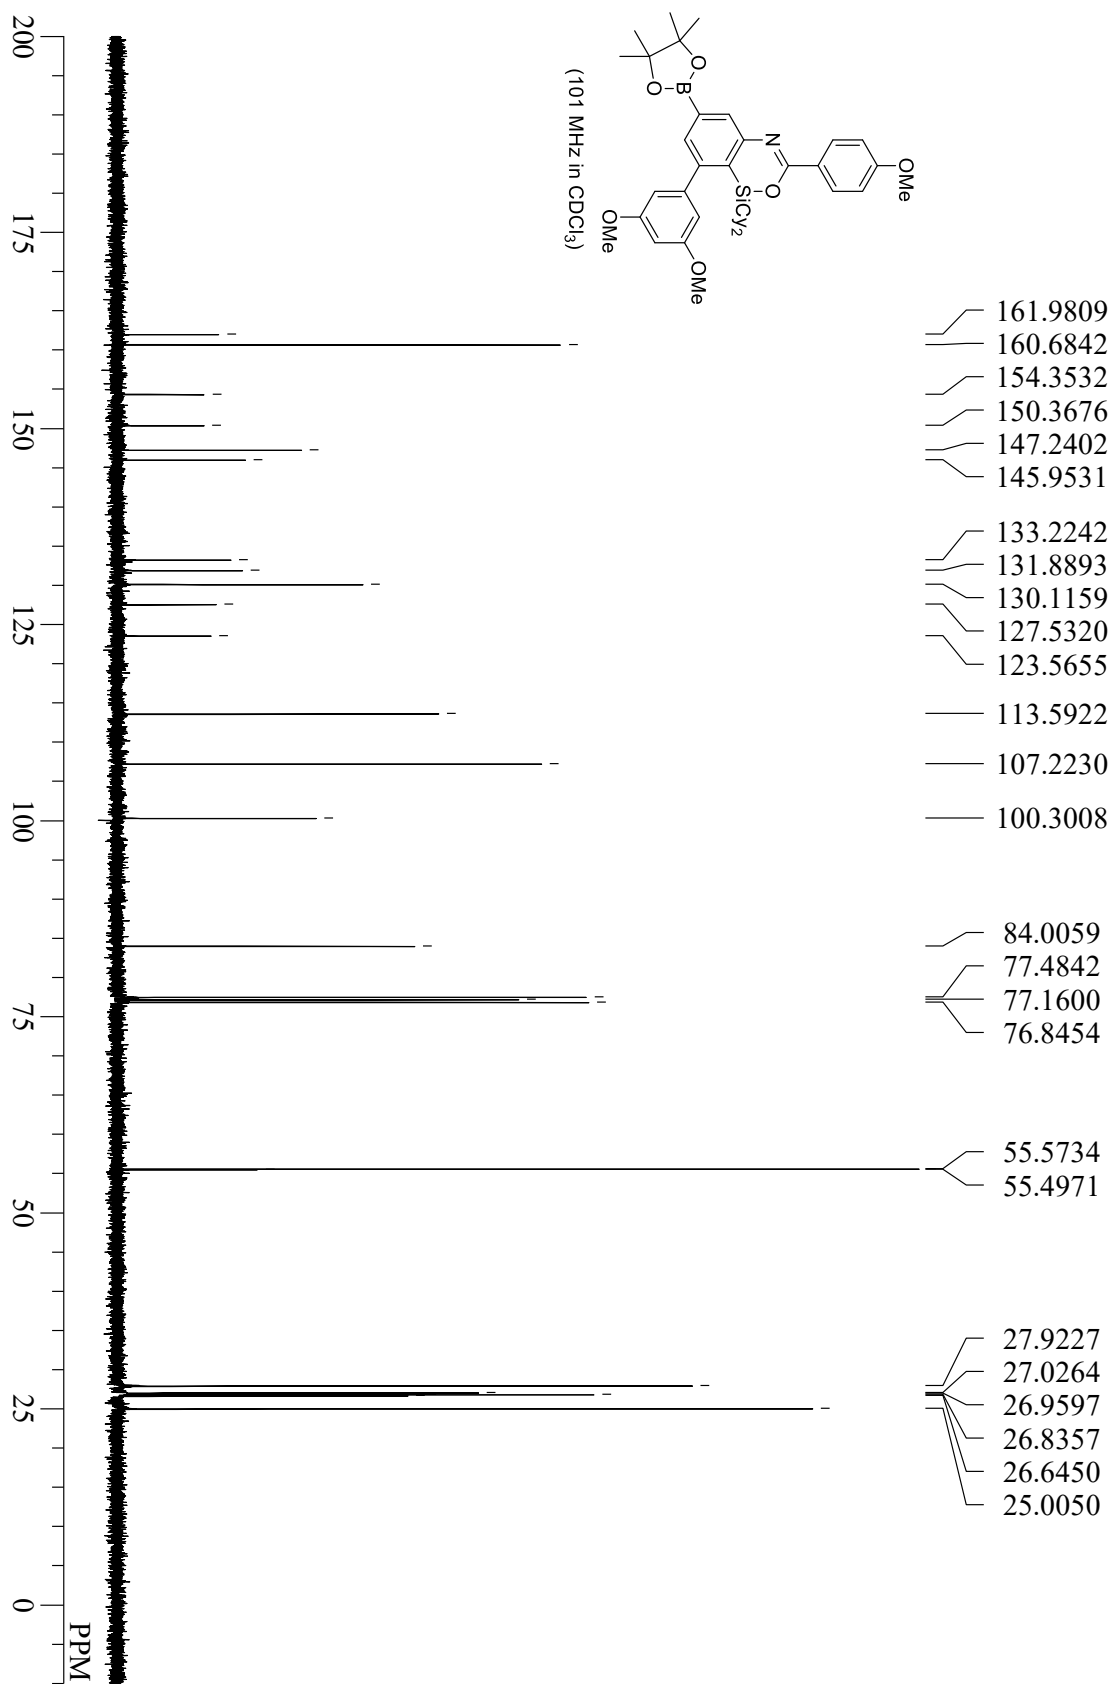



## VI. References

1. M. E. Krolski, A. F. Renaldo, D. E. Rudisill, J. K. Stille, *J. Org. Chem.* **1988**, *53*, 1170.
2. Y. Sato, C. Takagi, R. Shintani, K. Nozaki, *Angew. Chem. Int. Ed.* **2017**, *56*, 9211.
3. D. R. Coulson, L. C. Satek, S. O. Grim, *Inorg. Synth.* **1972**, *13*, 121.
4. S. Yoshida, K. Shimomori, T. Nonaka, T. Hosoya, *Chem. Lett.* **2015**, *44*, 1324.
